# Supplementary material for: Bacterial Colonization in the Airways and Intestines of Twin and Singleton Preterm Neonates: A Single‐Center Study
Source: Hindawi journal article supplement (doi:10.1155/2023/2973605), 2023-01-01
Supplement: f1 [file 2973605.f1.zip]

Sample gene sequences were annotated using the KEGG database on metabolic pathways based on their metabolic function prediction using PICRUSt2.

| KEGGLevel1                           | description                          | A1          | A10         |
|--------------------------------------|--------------------------------------|-------------|-------------|
| Genetic Information Processing       | Genetic Information Processing       | 33936384.75 | 24727898.53 |
| Unclassified                         | Unclassified                         | 29152591.17 | 22824867.12 |
| Cellular Processes                   | Cellular Processes                   | 7992618.08  | 6967753.85  |
| Organismal Systems                   | Organismal Systems                   | 1580022.68  | 1315423.83  |
| Environmental Information Processing | Environmental Information Processing | 26930613.05 | 19546303.31 |
| Human Diseases                       | Human Diseases                       | 2822849.71  | 2243678     |
| Metabolism                           | Metabolism                           | 85411583.05 | 64989596.14 |

| A11         | A12         | A13         | A14         | A15         | A16         | A17         | A18         |
|-------------|-------------|-------------|-------------|-------------|-------------|-------------|-------------|
| 25133060.22 | 23850292.27 | 28252823.64 | 17253773.49 | 16639555.44 | 19235445.16 | 30303085.41 | 18874169.04 |
| 15223611.51 | 21849359.91 | 26055497.67 | 15581367.02 | 14524341.79 | 16013047.17 | 27939304.88 | 17467533.56 |
| 1646013.14  | 6951222.10  | 7830102.24  | 4810913.92  | 3772614.51  | 3989543.25  | 8210143.91  | 5084889.07  |
| 532759.85   | 1269191.62  | 1481093.58  | 890845.68   | 780407.07   | 830220.09   | 1583403.29  | 992739.67   |
| 22868246.48 | 19374347.82 | 22095493.86 | 13629485.34 | 13030969.38 | 15561940.20 | 23177863.24 | 14429314.82 |
| 1213336.89  | 2188794.95  | 2624943.30  | 1594315.94  | 1354956.36  | 1483764.47  | 2716034.35  | 1704875.10  |
| 51691794.67 | 63146357.85 | 73942557.19 | 44640836.89 | 41582315.58 | 47032970.18 | 78979495.82 | 48897901.69 |

| A19         | A2          | A20         | A3           | A4          | A5          | A6          | A7           |
|-------------|-------------|-------------|--------------|-------------|-------------|-------------|--------------|
| 19029715.73 | 16855246.96 | 15289300.12 | 39309375.92  | 17126598.94 | 29407818.24 | 37340765.21 | 38722411.21  |
| 17644499.07 | 15840847.78 | 12297225.89 | 36294698.94  | 17066491.47 | 18618572.72 | 28855141.19 | 35796650.41  |
| 5024297.79  | 4427325.56  | 2541293.51  | 10613722.31  | 4621808.38  | 2209911.41  | 6641043.89  | 10718769.02  |
| 1002555.36  | 747795.08   | 528271.92   | 2047053.77   | 809718.71   | 789505.33   | 1402501.33  | 2047507.05   |
| 14464904.15 | 18909600.00 | 11038231.63 | 30433469.75  | 14319067.96 | 18727139.98 | 31262072.97 | 30576665.06  |
| 1684363.47  | 1133464.20  | 1147338.62  | 3495800.01   | 1493204.50  | 1614693.74  | 2673101.12  | 3473406.24   |
| 49498394.92 | 42667567.96 | 37430635.57 | 102905155.01 | 44370340.46 | 63545638.12 | 87694096.30 | 102331618.93 |

| A8           | A9          | B1          | B10         | B11         | B12         | B13         | B14         |
|--------------|-------------|-------------|-------------|-------------|-------------|-------------|-------------|
| 39713111.86  | 30079185.96 | 36021670.37 | 22401422.90 | 25114908.92 | 29151016.41 | 19383705.39 | 22935467.22 |
| 36676638.24  | 27758654.48 | 21524215.01 | 20701159.93 | 23334677.94 | 27048936.96 | 17912801.87 | 21228252.97 |
| 10854839.64  | 8773885.55  | 2253722.99  | 6221246.37  | 6467743.86  | 7595794.90  | 5315962.94  | 6319787.03  |
| 2107668.01   | 1602755.62  | 762779.40   | 1174332.27  | 1328606.86  | 1523192.87  | 1018247.45  | 1206037.51  |
| 30846240.68  | 24636209.61 | 32625133.20 | 17426415.20 | 18751988.16 | 22092372.38 | 15060927.63 | 17917335.24 |
| 3537316.08   | 2870597.34  | 1705558.66  | 2078976.86  | 2168631.50  | 2575658.03  | 1718596.09  | 2077714.78  |
| 104354529.75 | 80112717.75 | 73615257.90 | 58301590.39 | 65216579.12 | 75908188.63 | 50448543.50 | 60001285.60 |

| B15         | B16         | B17         | B18         | B19         | B2          | B20         | B3           |
|-------------|-------------|-------------|-------------|-------------|-------------|-------------|--------------|
| 14157125.61 | 17872119.66 | 6308887.71  | 17776787.53 | 17194384.15 | 34525988.54 | 17994976.86 | 40682489.53  |
| 9396033.81  | 16524853.65 | 5480819.83  | 16456601.54 | 16005968.97 | 31080678.34 | 16619115.78 | 37435748.84  |
| 1408678.90  | 4906201.37  | 1524088.24  | 4813691.42  | 4682522.74  | 10550443.26 | 5012397.34  | 11393984.81  |
| 465244.60   | 939418.42   | 263982.72   | 930535.66   | 902503.85   | 1814766.54  | 948673.40   | 2150708.18   |
| 8343459.17  | 13829659.88 | 5479621.37  | 13727761.65 | 13425033.23 | 29510748.36 | 14095311.87 | 31932974.18  |
| 725711.25   | 1611560.81  | 514283.85   | 1590912.66  | 1569544.23  | 3111831.07  | 1663526.57  | 3696612.60   |
| 28260059.48 | 46630886.78 | 16296746.62 | 46291244.16 | 44725819.57 | 91353988.96 | 46733184.43 | 106774185.92 |

| B4           | B5          | B6           | B7           | B8           | B9          | C1          | C10         |
|--------------|-------------|--------------|--------------|--------------|-------------|-------------|-------------|
| 38199559.50  | 15178833.30 | 38497138.60  | 39445043.52  | 40724981.08  | 11606053.75 | 18408062.23 | 17113368.68 |
| 35378999.85  | 14096553.10 | 35588634.72  | 36754138.72  | 37567820.30  | 9356882.67  | 12359909.41 | 15133270.54 |
| 10115173.55  | 4177346.01  | 10308227.61  | 10503213.99  | 11053901.15  | 2230854.97  | 2191261.51  | 5307974.18  |
| 1997098.95   | 791917.07   | 2023224.24   | 2064811.36   | 2127580.12   | 465783.61   | 438732.74   | 846276.24   |
| 29419553.25  | 11832704.41 | 29354651.92  | 30159973.85  | 31026611.61  | 9383178.21  | 14346535.77 | 16900187.54 |
| 3363217.63   | 1353626.83  | 3441339      | 3577320.17   | 3725554.21   | 857002.80   | 1342166.23  | 1928430.99  |
| 100476798.97 | 39032277.41 | 100854418.11 | 102233667.36 | 105922356.64 | 27838539.09 | 41905547.87 | 47268306.32 |

| C11         | C12         | C13         | C14         | C15         | C16         | C17         | C18         |
|-------------|-------------|-------------|-------------|-------------|-------------|-------------|-------------|
| 9784486.10  | 14239801.73 | 27677435.58 | 9728466.44  | 9767823.54  | 8911981.37  | 8867403.05  | 27008875.09 |
| 5605041.95  | 13028524.58 | 18034155.86 | 5471332.36  | 5453932.61  | 4937661.23  | 4995035.53  | 23548872.04 |
| 712797.09   | 4765096.47  | 1264359.44  | 594855.75   | 615859.40   | 568493.60   | 597780.61   | 5479513.20  |
| 228978.64   | 776527.58   | 347469.17   | 213167.76   | 221808.78   | 198985.21   | 206722.40   | 1219763.83  |
| 7990647.39  | 14383744.46 | 18201207.68 | 7673623.10  | 7824750.59  | 7209698.97  | 7168746.92  | 23774244.63 |
| 439770.30   | 1663961.35  | 1509505.19  | 420363.78   | 414108.26   | 381191.88   | 390141.79   | 2118862.88  |
| 19398480.91 | 41246444.33 | 62394405.99 | 19185106.90 | 19056549.97 | 17357162.05 | 17401766.17 | 71571575.31 |

| C19         | C2          | C20         | C3          | C4          | C5          | C6          | C7          |
|-------------|-------------|-------------|-------------|-------------|-------------|-------------|-------------|
| 13324089.90 | 15189667.80 | 10463814.95 | 17481183.26 | 9694939.10  | 9442003.20  | 17409076.61 | 13817679.79 |
| 7112772.11  | 12595224.30 | 5758467.70  | 15049932.06 | 7101320.74  | 5480470.40  | 13023074.96 | 9225228.05  |
| 909637.20   | 4654417.67  | 838088.75   | 4157554.93  | 1940580.18  | 754639.93   | 3241673.77  | 1036643.65  |
| 372438.67   | 672790.06   | 331092.21   | 874087.17   | 323826.90   | 227239.80   | 845141.92   | 266518.82   |
| 8920815.88  | 14930612.56 | 7349687.20  | 15378405.80 | 8642919.30  | 7716852.36  | 16489935.64 | 10773147.87 |
| 579690.84   | 1438793.53  | 498159.75   | 1424591.57  | 803545.26   | 450381.36   | 1145301.61  | 996712.51   |
| 25509337.80 | 39890255.84 | 20569390.51 | 46884750.55 | 23668187.72 | 19193185.21 | 46423837.76 | 31865710.58 |



| C8          | C9          | D1          | D10         | D11         | D12         | D13         | D14         |
|-------------|-------------|-------------|-------------|-------------|-------------|-------------|-------------|
| 14075959.81 | 16032775.17 | 11466178.73 | 9666512.28  | 9087168.98  | 25113795.84 | 18761607.90 | 15768593.44 |
| 12472105.34 | 14852339.35 | 7066790.00  | 5514718.49  | 5083279.57  | 16613251.80 | 15376798.40 | 14224340.81 |
| 4689891.39  | 5889596.67  | 1421975.39  | 665151.79   | 582955.58   | 1359751.06  | 4603681.45  | 5126821.93  |
| 727938.48   | 824291.03   | 379535.04   | 224587.28   | 204782.13   | 339179.65   | 873489.21   | 867438.08   |
| 14771997.01 | 17868006.88 | 8753946.40  | 7814550.80  | 7293694.97  | 16870227.66 | 17095582.71 | 16271545.51 |
| 1605730.67  | 1935558.80  | 659460.28   | 416827.80   | 391414.48   | 1417374.56  | 1775500.24  | 1727750.36  |
| 40463472.64 | 46501910.25 | 24312296.91 | 19044118.26 | 17712377.26 | 57105436.75 | 50093834.53 | 47213869.84 |

| D15         | D16         | D17         | D18         | D19         | D2          | D20         | D3          |
|-------------|-------------|-------------|-------------|-------------|-------------|-------------|-------------|
| 14801264.38 | 19077321.95 | 13516581.02 | 9973353.54  | 9429343.85  | 20162106.13 | 9541776.11  | 29165598.96 |
| 12185313.10 | 12087821.49 | 9348068.40  | 5538705.71  | 5147491.29  | 17118234.34 | 5584043.02  | 19223435.66 |
| 3892070.07  | 979463.94   | 688409.86   | 606428.37   | 536461.45   | 6373781.41  | 804577.93   | 1583178.57  |
| 673513.24   | 282051.04   | 204400      | 219075.83   | 206250.21   | 1080856.24  | 236076.34   | 399055.66   |
| 13898163.40 | 13133215.02 | 10311591.70 | 7953997.05  | 7536453.47  | 19616649.21 | 7780883.50  | 19482782.73 |
| 1406506.84  | 1007778.77  | 1182084.20  | 425998.47   | 385162.30   | 2188358.30  | 463610.89   | 1637993.22  |
| 38694211.64 | 41943864.35 | 32373950.13 | 19485441.07 | 18143970.88 | 56259789.33 | 19332421.71 | 66244311.31 |

| D4          | D5          | D6          | D7          | D8          | D9          |
|-------------|-------------|-------------|-------------|-------------|-------------|
| 9515225.00  | 24233113.99 | 17929306.62 | 18751146.62 | 8913790.08  | 18259797.72 |
| 8874277.65  | 23600284.84 | 15860095    | 16526110.17 | 5190103.53  | 17118759.72 |
| 3630231.06  | 4124198.91  | 5866374.55  | 6268668.60  | 729547.79   | 5369721.92  |
| 515659.57   | 745138.68   | 907402.07   | 989077.01   | 220982.89   | 812619.33   |
| 10767533.31 | 23625273.03 | 19696462.83 | 19840323.87 | 7284402.26  | 18897044.58 |
| 1247017.74  | 1575011.19  | 1983177.47  | 2079095.80  | 416670.90   | 1762495.60  |
| 28011339.52 | 55175820.54 | 51212933.08 | 52916516.77 | 17967094.16 | 48639554.62 |
