# Supplementary material for: Bacterial Colonization in the Airways and Intestines of Twin and Singleton Preterm Neonates: A Single‐Center Study
Source: Hindawi journal article supplement (doi:10.1155/2023/2973605), 2023-01-01
Supplement: f1 [file 2973605.f1.zip]

Sample gene sequences were annotated using the KEGG database on metabolic pathways based on their metabolic function prediction using PICRUST2.

| KEGGLevel2                                  | description                                 | A1          |
|---------------------------------------------|---------------------------------------------|-------------|
| Poorly Characterized                        | Poorly Characterized                        | 11012812.82 |
| Replication and Repair                      | Replication and Repair                      | 14889870.48 |
| Glycan Biosynthesis and Metabolism          | Glycan Biosynthesis and Metabolism          | 3507318.28  |
| Digestive System                            | Digestive System                            | 79018.26    |
| Nervous System                              | Nervous System                              | 85528       |
| Metabolism                                  | Metabolism                                  | 3951396.28  |
| Cardiovascular Diseases                     | Cardiovascular Diseases                     | 78330       |
| Metabolism of Other Amino Acids             | Metabolism of Other Amino Acids             | 3557521.44  |
| Cell Growth and Death                       | Cell Growth and Death                       | 1115302.76  |
| Environmental Adaptation                    | Environmental Adaptation                    | 321151.36   |
| Carbohydrate Metabolism                     | Carbohydrate Metabolism                     | 16097980.18 |
| Immune System Diseases                      | Immune System Diseases                      | 114115.24   |
| Folding, Sorting and Degradation            | Folding, Sorting and Degradation            | 5032069.88  |
| Circulatory System                          | Circulatory System                          | 92341.50    |
| Lipid Metabolism                            | Lipid Metabolism                            | 6833540.65  |
| Infectious Diseases                         | Infectious Diseases                         | 1092862.97  |
| Metabolism of Cofactors and Vitamins        | Metabolism of Cofactors and Vitamins        | 7079792.93  |
| Nucleotide Metabolism                       | Nucleotide Metabolism                       | 6464959.08  |
| Amino Acid Metabolism                       | Amino Acid Metabolism                       | 17737688.56 |
| Translation                                 | Translation                                 | 9305689.06  |
| Energy Metabolism                           | Energy Metabolism                           | 10223582.61 |
| Sensory System                              | Sensory System                              | 0           |
| Transport and Catabolism                    | Transport and Catabolism                    | 606179.88   |
| Signaling Molecules and Interaction         | Signaling Molecules and Interaction         | 334636.92   |
| Enzyme Families                             | Enzyme Families                             | 3999026.81  |
| Excretory System                            | Excretory System                            | 88077.77    |
| Xenobiotics Biodegradation and Metabolism   | Xenobiotics Biodegradation and Metabolism   | 5723608.20  |
| Cell Motility                               | Cell Motility                               | 6271135.44  |
| Endocrine System                            | Endocrine System                            | 804409.99   |
| Membrane Transport                          | Membrane Transport                          | 21503455.27 |
| Genetic Information Processing              | Genetic Information Processing              | 5330113.72  |
| Biosynthesis of Other Secondary Metabolites | Biosynthesis of Other Secondary Metabolites | 1119350.92  |
| Transcription                               | Transcription                               | 4708755.33  |

Cancers  
Signal Transduction  
Metabolism of Terpenoids and Polyketides  
Cellular Processes and Signaling  
Neurodegenerative Diseases  
Metabolic Diseases  
Immune System

|                                          |            |
|------------------------------------------|------------|
| Cancers                                  | 425276.62  |
| Signal Transduction                      | 5092520.86 |
| Metabolism of Terpenoids and Polyketides | 3067213.39 |
| Cellular Processes and Signaling         | 8858268.35 |
| Neurodegenerative Diseases               | 997167.11  |
| Metabolic Diseases                       | 115097.77  |
| Immune System                            | 109495.80  |

| A10         | A11         | A12         | A13         | A14         | A15         | A16         | A17         |
|-------------|-------------|-------------|-------------|-------------|-------------|-------------|-------------|
| 8486813.77  | 6360419.63  | 8126190.39  | 9677337.77  | 5784477.08  | 5463807.41  | 6113958.67  | 10401555.83 |
| 10783405.26 | 11310671.06 | 10415429.78 | 12327980.97 | 7550188     | 7290340.07  | 8459592.47  | 13218378.78 |
| 2682831.16  | 1982035.70  | 2575102.52  | 3083786.08  | 1860856.04  | 1756080.98  | 1932105.47  | 3280737.84  |
| 61145.82    | 54373.06    | 59203.95    | 68414.81    | 42568.72    | 40728.37    | 45869.35    | 73008.62    |
| 64888.36    | 54876.96    | 61297.09    | 75847.46    | 45653.87    | 43766.76    | 47672.93    | 82884.87    |
| 3047897.01  | 2298892.81  | 2980975.37  | 3486121.11  | 2121225.85  | 1937287.69  | 2168794.88  | 3692672.83  |
| 66967.08    | 7981        | 66975.66    | 82934.68    | 50022.66    | 35744.34    | 36629.66    | 80006.48    |
| 2760619.71  | 1928552.63  | 2711789.18  | 3114663.80  | 1879691.72  | 1712780.89  | 1923107.31  | 3324675.18  |
| 855983.10   | 620546.69   | 843309.35   | 1000593     | 603111.39   | 540426.74   | 600757.16   | 1033064.61  |
| 260198.86   | 172211.34   | 251549.88   | 291710.77   | 175599.07   | 160677.90   | 179030.73   | 313228.21   |
| 11173718.59 | 14922660.60 | 10949616.70 | 12759925.46 | 7774431.61  | 7726448.68  | 9369440.39  | 13597691.57 |
| 78123.55    | 103688.46   | 75900.64    | 87404.38    | 53190.71    | 55566.17    | 65863.37    | 95707.58    |
| 3869428.59  | 2782512.17  | 3719816.12  | 4415706.30  | 2683181.27  | 2482062.08  | 2765354.43  | 4740230.32  |
| 80955.54    | 8786        | 85489.49    | 89460.01    | 57447.49    | 38907.01    | 41860.99    | 92720.68    |
| 5365416.07  | 3463396.21  | 5228611.47  | 6051277.93  | 3617962.55  | 3295352.19  | 3673675.48  | 6488072.06  |
| 802644.93   | 712580.05   | 773928.05   | 941719.65   | 574204.29   | 525778.61   | 600767.20   | 989637.11   |
| 5578008.15  | 3316234.40  | 5371057.43  | 6392025.00  | 3866575.02  | 3515262.27  | 3842445.21  | 6814208.42  |
| 4644460.92  | 5044789.74  | 4485627.95  | 5317914.91  | 3251009.31  | 3184749.59  | 3693895.78  | 5682525.27  |
| 13882820.06 | 8585125.06  | 13521842.75 | 15741964.20 | 9497790.19  | 8571633.14  | 9493436.00  | 16816375.43 |
| 6682019.77  | 7186433.37  | 6418176.24  | 7651301.90  | 4680253.03  | 4579814.46  | 5310792.58  | 8214166.14  |
| 7911093.13  | 5760108.38  | 7670251.80  | 9045952.81  | 5456978.57  | 5024596.40  | 5624612.12  | 9604530.21  |
| 0           | 8           | 0           | 0           | 0           | 0           | 9           | 0           |
| 507696.03   | 201065.17   | 485128.76   | 571558.37   | 338836.82   | 300671.73   | 319645.75   | 611513.32   |
| 239347.94   | 262690.65   | 242849.37   | 263487.83   | 165852.51   | 153775.91   | 181561.31   | 287432.28   |
| 3028636.83  | 2439937.78  | 2942312.91  | 3445182.11  | 2109297.98  | 1925588.97  | 2186574.63  | 3689497.71  |
| 76860.61    | 9031.56     | 74266.68    | 86047.11    | 52532.91    | 43655.32    | 44143.76    | 90680.13    |
| 4749400.72  | 1791964.49  | 4563356.94  | 5341187.47  | 3130076.08  | 2832894.46  | 3000207.76  | 5768343.03  |
| 5604074.72  | 824401.28   | 5622783.99  | 6257950.87  | 3868965.71  | 2931516.04  | 3069140.34  | 6565565.98  |
| 671178.15   | 221485.47   | 644961.91   | 756204.35   | 451856.16   | 391693.86   | 412539.79   | 808009.48   |
| 15149792.39 | 20419380.13 | 15057443.23 | 17143671.82 | 10591816.16 | 10423376.87 | 12668799.36 | 17940493.64 |
| 4001057.33  | 3415520.30  | 3822930.05  | 4593657.78  | 2756170.22  | 2655150.33  | 2976039.68  | 4926404.58  |
| 873691.83   | 622404.37   | 844935.29   | 993634.36   | 588375.52   | 548103.66   | 612222.37   | 1077606.90  |
| 3393044.91  | 3853443.62  | 3296870.13  | 3857834.47  | 2340151.19  | 2287338.83  | 2699705.68  | 4130310.17  |

|            |            |            |            |            |            |            |            |
|------------|------------|------------|------------|------------|------------|------------|------------|
| 372953.48  | 44744.15   | 361800.68  | 443554.16  | 264826     | 209792.10  | 213160.16  | 448121.85  |
| 4157162.98 | 2186175.70 | 4074055.22 | 4688334.21 | 2871816.67 | 2453816.60 | 2711579.53 | 4949937.32 |
| 2338898.97 | 1834585.31 | 2281852.91 | 2655043.06 | 1607792.30 | 1488824.35 | 1681247.66 | 2835232.20 |
| 7289099.01 | 3148778.77 | 6919264.10 | 8298381.01 | 4919493.87 | 4468096.36 | 4754253.94 | 8918671.64 |
| 844369.80  | 240476.04  | 832410.62  | 978552.93  | 593836.61  | 472294.49  | 501453.02  | 1006657.24 |
| 78619.16   | 103867.19  | 77779.30   | 90777.50   | 58235.67   | 55780.65   | 65891.06   | 95904.09   |
| 100196.49  | 11987.46   | 92422.62   | 113409.07  | 65187.46   | 60977.85   | 59093.54   | 122871.30  |

| A18         | A19         | A2          | A20        | A3          | A4          | A5          | A6          |
|-------------|-------------|-------------|------------|-------------|-------------|-------------|-------------|
| 6487325.21  | 6569577.44  | 5962578.58  | 4781602.22 | 13525352.81 | 6111737.53  | 7568937.46  | 11198237.96 |
| 8222193.48  | 8288423.91  | 7183207.72  | 6753768.32 | 17148167.72 | 7394878.62  | 13323664.04 | 16539005.28 |
| 2065883.84  | 2081395.43  | 2374122.10  | 1406826.99 | 4266905.68  | 2434244.20  | 2058699.44  | 3552061.82  |
| 45692.53    | 46280.11    | 30359.84    | 35988.38   | 96099.21    | 42563.10    | 69085.42    | 84997.75    |
| 47446.53    | 49448.96    | 48955.36    | 36997.39   | 103962.61   | 50079.50    | 113303.84   | 92858.86    |
| 2290123.65  | 2295212.96  | 2414749.96  | 1562927.96 | 4803096.25  | 2545373.40  | 2383410.48  | 4041984.01  |
| 50608.34    | 48456.56    | 14402.32    | 22316.34   | 102384.34   | 38156.50    | 9811.02     | 62045.02    |
| 2048866.23  | 2080134.21  | 1771882.38  | 1504863.33 | 4365581.02  | 1815022.25  | 2335668.27  | 3531669.42  |
| 638303.63   | 644354.83   | 399553.64   | 440143.05  | 1357418.13  | 520799.67   | 726833.72   | 1124536.15  |
| 195407.22   | 196270.90   | 224678.06   | 118764.81  | 401968.40   | 169009.90   | 159321.34   | 324535.21   |
| 8308716.52  | 8398278.56  | 9014613.38  | 7443720.12 | 17681204.48 | 8058675.01  | 14194771.40 | 19263812.42 |
| 58928.89    | 60681.98    | 52126.24    | 42023.42   | 126663.28   | 50843.70    | 71936.94    | 132900.17   |
| 2968891.89  | 2993583.35  | 2483912.46  | 2246247.71 | 6148250.86  | 2627656.43  | 4079410.80  | 5033648.13  |
| 57060.51    | 55171.87    | 16857.48    | 25277.50   | 121717.02   | 39663.50    | 12002.02    | 69750.02    |
| 4003587.50  | 4065601.37  | 3023317     | 2824894.56 | 8479451.85  | 3427505.24  | 4158466.65  | 6655237.08  |
| 617719.86   | 610533.92   | 597610.58   | 522832.05  | 1260082.71  | 603937.67   | 860487.23   | 1155152.03  |
| 4249394.10  | 4297623.26  | 3583404.44  | 3393039.59 | 8866112.66  | 3797373.87  | 6308183.98  | 6776456.82  |
| 3529024.72  | 3570600.52  | 3222054.98  | 2999250.58 | 7390037.38  | 3236318.59  | 5937392.13  | 7274991.36  |
| 10420865.16 | 10556765.38 | 8519453.70  | 7890236.92 | 21962173.13 | 8943534.74  | 13089631.13 | 16971623.89 |
| 5130826.41  | 5180055.52  | 4235970.26  | 4260071.78 | 10648668.50 | 4478743.28  | 8504614.91  | 10378799.52 |
| 5986165.50  | 6041551.29  | 4599700.32  | 4550249.30 | 12521267.28 | 5402721.24  | 7702489.50  | 10302729.32 |
| 0           | 0           | 0           | 0          | 0           | 0           | 0           | 0           |
| 381175.72   | 387040.29   | 214396.74   | 220923.33  | 791708.85   | 311857.59   | 303716.20   | 536769.38   |
| 168350.42   | 170526.70   | 136368.44   | 133784.21  | 369199.78   | 142954.67   | 241965.47   | 369784.18   |
| 2279200.38  | 2284099.25  | 2273842.50  | 1699269.23 | 4750414.06  | 2149305.50  | 2951295.57  | 4123944.38  |
| 58563.72    | 59578.24    | 51151.68    | 26919.04   | 120746.81   | 50039.24    | 55986.03    | 67380.46    |
| 3601069.49  | 3681249.52  | 2223667.94  | 1996464.08 | 7545042.09  | 3062307.03  | 1959921.16  | 4984368.06  |
| 4065409.72  | 3992902.67  | 3813375.18  | 1880227.13 | 8464595.33  | 3789151.12  | 1179361.49  | 4979738.36  |
| 510661.66   | 516213.62   | 302811.52   | 248773.06  | 1043802.20  | 392068.33   | 363696.51   | 675101.34   |
| 11159294.82 | 11210276.03 | 15941915.62 | 8920235.86 | 23652874.55 | 11237273.35 | 15890641.03 | 26073720.61 |
| 3087914.18  | 3109994.15  | 2569731.76  | 2168581.09 | 6362710.29  | 3010182.52  | 3441666.80  | 5590820.48  |
| 645100.96   | 657488.21   | 717324.72   | 462789.42  | 1370403.21  | 590269.93   | 709101.74   | 1125994.20  |
| 2552257.26  | 2567652.95  | 2952156.52  | 2029212.31 | 5364288.84  | 2625320.61  | 3500128.49  | 5389312.28  |

|            |            |            |            |             |            |            |            |
|------------|------------|------------|------------|-------------|------------|------------|------------|
| 285695.47  | 281337.31  | 165821.96  | 158690.22  | 577734.95   | 234611.91  | 175212.26  | 339218.16  |
| 3101669.58 | 3084101.42 | 2831315.94 | 1984211.56 | 6411395.42  | 2938839.94 | 2594533.48 | 4818568.18 |
| 1760027.29 | 1783607.92 | 1344184.50 | 1259031.45 | 3706562.17  | 1453062.86 | 2140017.15 | 3131207.53 |
| 5602170.52 | 5669714.52 | 4893787.48 | 3784114.62 | 11603539.59 | 5399198.02 | 5224557.98 | 8024098.74 |
| 633898.37  | 624809.15  | 235110.08  | 344912.28  | 1304168.25  | 498987.32  | 343751.67  | 846162.50  |
| 58024.17   | 58544.55   | 68393.02   | 56564.31   | 124766.48   | 66667.40   | 153494.62  | 137623.24  |
| 77907.50   | 79591.66   | 72981.14   | 35551.74   | 158757.52   | 66295.14   | 16110.17   | 87877.69   |

| A7          | A8          | A9          | B1          | B10         | B11         | B12         | B13         |
|-------------|-------------|-------------|-------------|-------------|-------------|-------------|-------------|
| 13342449.58 | 13681574.23 | 10301957.04 | 9006883.83  | 7679798.27  | 8712050.02  | 10076371.77 | 6662517.91  |
| 16898287.87 | 17307615.92 | 13137678.92 | 16234244.24 | 9761471.87  | 10925782.12 | 12688239.83 | 8451746.78  |
| 4208744.95  | 4310333.05  | 3255339.05  | 2807637.92  | 2470662.29  | 2740746.78  | 3190691.27  | 2115158.42  |
| 96400.25    | 95956.36    | 74353.92    | 77856.41    | 53861.68    | 60471.28    | 70513.56    | 47823.59    |
| 103001.42   | 105033.08   | 83964.91    | 82433.61    | 57957.29    | 63878.06    | 78530.61    | 49007.26    |
| 4766210.50  | 4855242.75  | 3817792.16  | 3266561.07  | 2757466.59  | 3002488.96  | 3517049.20  | 2367667.66  |
| 102855.34   | 103514.68   | 93875.48    | 9802.32     | 64532.34    | 59521       | 75138.53    | 49092.32    |
| 4372138.46  | 4445032.12  | 3407449.42  | 2734826.88  | 2443611.29  | 2745699.52  | 3181414.94  | 2133924.24  |
| 1367538.71  | 1370488.58  | 1104349.40  | 884724.51   | 775751.13   | 828152.88   | 1004753.37  | 649183.24   |
| 401662.03   | 413729.34   | 315151.84   | 243073.41   | 233802.67   | 258201.20   | 298445.37   | 201686.37   |
| 17600084.50 | 17912116.92 | 13969735.65 | 21327484.89 | 10029341.37 | 11022344.12 | 12911925.69 | 8622748.04  |
| 126014.52   | 127223.44   | 94026.35    | 148351.89   | 68198.25    | 81246.14    | 92277.86    | 61641.01    |
| 6062542.42  | 6217142.13  | 4682838.52  | 3979450.24  | 3513025.83  | 3957873.84  | 4577668.26  | 3038227.70  |
| 125742.51   | 125891.51   | 103911.48   | 11397.99    | 70692.50    | 71272.50    | 81088.52    | 61738.99    |
| 8457155     | 8641961.74  | 6595599.98  | 4889115.39  | 4763669.62  | 5387357.26  | 6207225.06  | 4156103.12  |
| 1235676.45  | 1272829.30  | 1012503.52  | 1007556.40  | 753725.40   | 793207.90   | 936188.15   | 622207.28   |
| 8769823.89  | 8937239.42  | 6840701.98  | 4750895.85  | 5055646.83  | 5643828.30  | 6612543.68  | 4346753.89  |
| 7300647.79  | 7447306.10  | 5685242.92  | 7247013.06  | 4189334.46  | 4688041.28  | 5489090.34  | 3618059.98  |
| 21887237.76 | 22303253.22 | 17093472.41 | 12213589.12 | 12394443.90 | 13936051.22 | 16177833.39 | 10778449.95 |
| 10466663.35 | 10748035.46 | 8106631.54  | 10318993.90 | 6065508.25  | 6834956.84  | 7948204.07  | 5239956.50  |
| 12434712.33 | 12646651.36 | 9772163.47  | 8195716.54  | 7133517.04  | 7908310.72  | 9272331.46  | 6138652.46  |
| 0           | 0           | 0           | 0           | 0           | 0           | 0           | 0           |
| 792729.59   | 813864.17   | 618937.04   | 284368.05   | 451869.36   | 514669.12   | 587164.61   | 391886.76   |
| 375610.78   | 382919.57   | 297458.40   | 377858.35   | 204876.26   | 225537.40   | 255874.63   | 182847.36   |
| 4697023.46  | 4846209.52  | 3713579.58  | 3482178.74  | 2747520.60  | 3023763.86  | 3492284.04  | 2356371.55  |
| 122221.79   | 124246.97   | 92886.09    | 14847.22    | 67389.76    | 79549.28    | 90114.23    | 60009.42    |
| 7534782.53  | 7695055.27  | 5812389.98  | 2467369.87  | 4205131.37  | 4901407.02  | 5630184.87  | 3698223.48  |
| 8558500.72  | 8670486.89  | 7050599.11  | 1084630.43  | 4993625.88  | 5124921.86  | 6003876.92  | 4274892.94  |
| 1043480.73  | 1083342.15  | 815073.95   | 318405.97   | 600232.12   | 691644.12   | 783473.65   | 519049.98   |
| 23789097.62 | 23924772.50 | 19197991.66 | 29177378.39 | 13477540.30 | 14503831.30 | 17180624.07 | 11663217.09 |
| 6268601.97  | 6434027.40  | 4878561.16  | 4855107.15  | 3649207.38  | 4109128.92  | 4772197.25  | 3138442.27  |
| 1366686.89  | 1410314.01  | 1081483.27  | 882556.45   | 784396.63   | 871994.18   | 1014772.11  | 671119.53   |
| 5294917.57  | 5440318.35  | 4152036.98  | 5488981.99  | 3061416.95  | 3396296.12  | 3936904.25  | 2653774.41  |

|             |             |            |            |            |            |            |            |
|-------------|-------------|------------|------------|------------|------------|------------|------------|
| 575987.56   | 583041.53   | 487842.15  | 58291.22   | 348603.52  | 355711.56  | 432852.83  | 281536.13  |
| 6411956.66  | 6538548.61  | 5140759.55 | 3069896.46 | 3743998.64 | 4022619.46 | 4655873.68 | 3214863.18 |
| 3702581.37  | 3759057.02  | 2885560.04 | 2616873.19 | 2084314.99 | 2347034.86 | 2727891.78 | 1812978.84 |
| 11419388.36 | 11705793.86 | 8760344.12 | 4395662.96 | 6614687.69 | 7511010.04 | 8683318.74 | 5744174.03 |
| 1309258.62  | 1325563.96  | 1082405.91 | 329188.23  | 772395.06  | 803752.62  | 948906.76  | 643823.77  |
| 123613.75   | 125143.17   | 99943.93   | 152368.60  | 71522.29   | 75192.28   | 90293.90   | 60295.58   |
| 154998.32   | 159468.60   | 117413.43  | 14764.79   | 90396.25   | 103590.42  | 121026.93  | 78931.84   |



| B14         | B15        | B16         | B17        | B18         | B19         | B2          | B20         |
|-------------|------------|-------------|------------|-------------|-------------|-------------|-------------|
| 7895260.83  | 3359041.72 | 6147646.98  | 1966458.32 | 6121611.53  | 5943871.67  | 11516153.28 | 6161190.07  |
| 10002559.03 | 6423367.73 | 7797842.29  | 2730960.11 | 7755325.49  | 7491592.73  | 15154041.84 | 7848230.93  |
| 2508523.87  | 1557124.06 | 1946479.76  | 581652.16  | 1944049.42  | 1900842.61  | 3695732.06  | 1977735.58  |
| 56266.51    | 50081      | 43972.17    | 11672.78   | 43757.56    | 42769.78    | 90725.50    | 44071.27    |
| 59791.28    | 51152.80   | 45842.97    | 18426.48   | 46062.74    | 45421.85    | 85425.51    | 45446.06    |
| 2818836.08  | 1482362.38 | 2183640.29  | 814954.50  | 2163757.09  | 2112094.41  | 4364999.63  | 2214722.85  |
| 61962.34    | 2533       | 47705.66    | 10992      | 46576.34    | 46853.68    | 91474.34    | 50782.02    |
| 2542687.40  | 1066086.35 | 1974059.92  | 637892.65  | 1953956.31  | 1877377.15  | 3939199.04  | 1965789.21  |
| 790500.19   | 361904.19  | 612342.13   | 190647.57  | 607676.07   | 590724.76   | 1204067.14  | 613943.53   |
| 238278.69   | 106249.92  | 185226.16   | 63796.56   | 183655.73   | 180449.83   | 364477.72   | 188249.31   |
| 10297022.34 | 5804739.16 | 7966005.57  | 3404331.36 | 7905923.35  | 7649929.55  | 16120834.66 | 8003130.54  |
| 72582.45    | 52321.60   | 56731.33    | 20879.48   | 56634.99    | 53101.45    | 113809.78   | 55150.04    |
| 3593029.65  | 1799692.29 | 2802406.81  | 894408.77  | 2787325.73  | 2698842.83  | 5334453.83  | 2823518.52  |
| 73261.51    | 2979       | 56973.99    | 11900      | 54906.51    | 51794.01    | 136220      | 58385.52    |
| 4944669.46  | 1773358.41 | 3845147.05  | 1182124.43 | 3805728.33  | 3652823.75  | 7529098.75  | 3826270.40  |
| 748465.66   | 395282.86  | 579193.06   | 239410.20  | 573627.56   | 569698.78   | 1084052.59  | 599911.09   |
| 5169114.94  | 2646468.82 | 4021636.77  | 1363584.18 | 4001646.65  | 3886295.67  | 7673756.84  | 4044719.31  |
| 4297067.72  | 3066286.62 | 3346139.21  | 1236894.84 | 3333086.90  | 3228934.81  | 6523526.44  | 3363969.10  |
| 12802958.18 | 5153339.87 | 9953449.47  | 3396541.35 | 9875458.74  | 9500721.61  | 19577152.35 | 9956978.47  |
| 6199357.42  | 4166533.43 | 4839700.84  | 1731978.05 | 4817752.75  | 4661082.48  | 9237685.86  | 4869605.08  |
| 7304984.07  | 3407813.55 | 5687347.77  | 1920220.83 | 5646233.25  | 5468240.50  | 11132236.42 | 5715890.55  |
| 0           | 0          | 0           | 0          | 0           | 0           | 0           | 0           |
| 467367.61   | 164862.57  | 363835.83   | 97419.13   | 360560.17   | 350480.54   | 686211.24   | 365226.80   |
| 216672.31   | 176966.45  | 167996.52   | 85410.91   | 164379.55   | 156520.56   | 372734.14   | 167057.04   |
| 2794119.64  | 1478038.07 | 2168605.95  | 815347.41  | 2145793.31  | 2089382.65  | 4221638.69  | 2197119.75  |
| 70272.56    | 9092.66    | 55011       | 14897.54   | 54763.49    | 52257.02    | 108616.29   | 54888.48    |
| 4380038.69  | 906333.07  | 3420947.14  | 945036.69  | 3397672.09  | 3268056.83  | 6423898.94  | 3382768.56  |
| 5061919.23  | 881912.14  | 3930023.41  | 1236021.54 | 3845455.18  | 3741317.44  | 8660164.88  | 4033227.01  |
| 614959.95   | 180107.22  | 479096.47   | 121168.88  | 473994.09   | 457356.34   | 898992.95   | 484021.31   |
| 13890593.10 | 7099305.13 | 10701497.42 | 4496313.23 | 10641986.27 | 10407536.39 | 23086784.52 | 10900996.30 |
| 3719517.95  | 2085861.03 | 2898053.03  | 967243.15  | 2888270.21  | 2804721.11  | 5444284.61  | 2926590.81  |
| 802535.83   | 451021.62  | 620068.40   | 257631.34  | 614280.01   | 602471.19   | 1187300.73  | 621565.75   |
| 3140521.12  | 1767532.16 | 2432169.72  | 951540.78  | 2416383.56  | 2342866.11  | 4799807.01  | 2453622.33  |

|            |            |            |            |            |            |            |            |
|------------|------------|------------|------------|------------|------------|------------|------------|
| 344218.74  | 72903.49   | 267261.81  | 69500.59   | 264029.70  | 263879.31  | 505005.57  | 278621.16  |
| 3810069.83 | 1067187.59 | 2960165.94 | 897897.23  | 2921395.83 | 2860976.28 | 6051229.70 | 3027258.53 |
| 2157563.46 | 949449.88  | 1680999.77 | 555489.38  | 1667415.80 | 1600743.25 | 3329614.04 | 1677247.21 |
| 6794638.11 | 2468768.68 | 5295513.35 | 1732163.86 | 5282962.71 | 5145281.78 | 9755240.82 | 5316612.05 |
| 778095.86  | 124808.53  | 604831.45  | 150655.99  | 594480.83  | 582216.12  | 1199764.41 | 622498.03  |
| 72389.73   | 77861.77   | 55837.50   | 22845.59   | 55563.24   | 53794.89   | 117724.38  | 56564.23   |
| 93207.01   | 65582      | 73295.66   | 22120.48   | 73395.54   | 72455.02   | 130308.57  | 73611.45   |

| B3          | B4          | B5         | B6          | B7          | B8          | B9         | C1          |
|-------------|-------------|------------|-------------|-------------|-------------|------------|-------------|
| 13926417.64 | 13196670.50 | 5243120.95 | 13264009.54 | 13666850.08 | 13983100    | 3608835.14 | 4800855.82  |
| 17760431.07 | 16649484.47 | 6617396.42 | 16776585.05 | 17184277.33 | 17751462.78 | 5141197.01 | 8266761.79  |
| 4408563.95  | 4156900.67  | 1679328.29 | 4178883.80  | 4358132.88  | 4443073.08  | 1123155.99 | 1944793.96  |
| 98641.04    | 92948.56    | 38660.83   | 91892.32    | 95715.72    | 95997.36    | 24809.06   | 42502.34    |
| 104673.90   | 103197.79   | 39224.66   | 99576.29    | 101834.22   | 105487.28   | 28076.81   | 49217.74    |
| 5001059.15  | 4664736.98  | 1851258.42 | 4679944.58  | 4824568.50  | 4971169.16  | 1275751.91 | 1684434.92  |
| 111703.02   | 97568.49    | 37492      | 102442.32   | 106258      | 114778.82   | 20184.98   | 17003.07    |
| 4549868.24  | 4260195.76  | 1634291.80 | 4277415.22  | 4280453.28  | 4465058.04  | 1129323.72 | 1516491.43  |
| 1411628.25  | 1327253.54  | 494076.12  | 1331406.45  | 1328660.83  | 1404623.62  | 352482.97  | 505004.16   |
| 421853.57   | 387620.38   | 161749.47  | 391610.55   | 406022.38   | 418502.72   | 101902.70  | 83974.66    |
| 18355197.81 | 17224456.44 | 6663863.07 | 17214321.32 | 17416191.50 | 18188035.67 | 5725589.03 | 9144465.47  |
| 129688.29   | 125031.17   | 46528.33   | 124311      | 123987.76   | 126475.33   | 41162      | 74421.70    |
| 6364187.48  | 5989932.25  | 2376604.52 | 6046908.72  | 6202151.49  | 6376005.38  | 1615693.41 | 2345262.98  |
| 136743.03   | 113758      | 46982      | 118634.99   | 116508.50   | 127476.98   | 23043.98   | 16716.24    |
| 8845136.71  | 8288315.80  | 3184230.24 | 8338776.44  | 8385571.71  | 8709248.19  | 2158185    | 2784733.71  |
| 1317736.34  | 1210337.21  | 502868.70  | 1235276.43  | 1300759.74  | 1351039.05  | 355213.51  | 794240.94   |
| 9138834.02  | 8665088.81  | 3392158.71 | 8698655.51  | 8888940.07  | 9157472.99  | 2229831.37 | 3262205.80  |
| 7618608.28  | 7202779.98  | 2822205.81 | 7215546.39  | 7361432.58  | 7604873.98  | 2259472.04 | 4027914.39  |
| 22850864.81 | 21449874.15 | 8294777.40 | 21556886.97 | 21755505.87 | 22567500.20 | 5553685.02 | 8850421.66  |
| 10984739.14 | 10368167.69 | 4096571.66 | 10449382.41 | 10697816.76 | 11032842.18 | 3212410.87 | 5403109.39  |
| 12987357.41 | 12222500.58 | 4741677.75 | 12280511.91 | 12454839.63 | 12895049.63 | 3296526.75 | 4251719.61  |
| 0           | 0           | 0          | 0           | 0           | 0           | 0          | 0           |
| 831604.06   | 771066.02   | 303858.81  | 781156.83   | 805335.90   | 821566.05   | 180641.32  | 206928.39   |
| 394699.64   | 352473.54   | 143279.88  | 354279.98   | 351841.26   | 377877.99   | 108162.31  | 298047.83   |
| 4966143.05  | 4588197.30  | 1859867.38 | 4644913.15  | 4769659.38  | 4975562.50  | 1293154.54 | 2205504.02  |
| 125861.31   | 119740.29   | 44731.99   | 120570.40   | 120104.69   | 122068.76   | 24086.75   | 16036.84    |
| 7775627.33  | 7451159.53  | 2844034.16 | 7471135.68  | 7539914.98  | 7693617.83  | 1707996.75 | 2023125.87  |
| 9150752.50  | 8016853.99  | 3379411.08 | 8195664.33  | 8369217.26  | 8827711.48  | 1697730.68 | 1479328.96  |
| 1100909.88  | 1025472.22  | 395901.46  | 1046667.82  | 1059183.62  | 1095111.72  | 231893.14  | 214012.23   |
| 24742195.34 | 22918806.77 | 9138036.33 | 22752624.72 | 23330832.84 | 23969628.60 | 7733018.39 | 11997494.02 |
| 6575229.16  | 6216309.72  | 2447206.97 | 6271578.22  | 6440387.25  | 6608506.77  | 1758512.03 | 2537965.89  |
| 1419474.90  | 1335564.39  | 534329.06  | 1331197.85  | 1365000.01  | 1428057.96  | 357491.71  | 616715.59   |
| 5573131.84  | 5191975.09  | 2088260.70 | 5224262.42  | 5360797.94  | 5564670.74  | 1636752.46 | 2392928.07  |

|             |             |            |             |             |             |            |            |
|-------------|-------------|------------|-------------|-------------|-------------|------------|------------|
| 611184.12   | 558677.17   | 220008.49  | 572063.39   | 598672.86   | 618926.88   | 115605.37  | 104811.42  |
| 6796079.20  | 6148272.94  | 2551388.20 | 6247747.22  | 6477299.75  | 6679105.02  | 1541997.51 | 2050993.92 |
| 3858509.41  | 3631765.56  | 1381513.74 | 3646173.87  | 3658025.47  | 3794806.57  | 1004127.17 | 1277456.36 |
| 11933042.89 | 11301282.65 | 4554966.76 | 11373102.38 | 11822332.89 | 12005044.37 | 2713783.59 | 3336652.78 |
| 1397122.50  | 1250836.98  | 499559.82  | 1287801.55  | 1326545.35  | 1386323.43  | 284374.70  | 254630.15  |
| 129178.33   | 120766.61   | 47169.49   | 119444.31   | 121096.46   | 128010.70   | 40462.24   | 97058.95   |
| 162025.45   | 154361.71   | 64666.66   | 154271.87   | 165442.23   | 162935.30   | 31971.17   | 16272.69   |

| C10         | C11        | C12         | C13         | C14        | C15        | C16        | C17        | C18         |
|-------------|------------|-------------|-------------|------------|------------|------------|------------|-------------|
| 5600273.26  | 2275330.21 | 4835422.51  | 7558776.35  | 2237628.38 | 2218899.98 | 2020696.18 | 2033279.31 | 8401204.64  |
| 7571471.84  | 4503104.06 | 6310726.88  | 12437126.23 | 4477211.72 | 4503238.53 | 4113072.69 | 4086930.51 | 11676217.03 |
| 1883118.57  | 884609.98  | 1526016.34  | 1959655.76  | 860087.16  | 879696.28  | 798558.97  | 795733.01  | 3147704.48  |
| 35498.06    | 23759.07   | 24949.76    | 61017.66    | 23266.46   | 23601.66   | 21775.38   | 21446.67   | 94221.41    |
| 38758.20    | 26122.15   | 40399.35    | 64555.07    | 26262.36   | 26842.18   | 23614.23   | 24364.67   | 143991.01   |
| 2526929.52  | 803132.67  | 2203728.20  | 2221567.35  | 766367.94  | 779700.02  | 700662.01  | 716394.93  | 3711528.24  |
| 70384.66    | 3643.32    | 65167       | 2509.18     | 2252.43    | 2420       | 2543       | 2861.50    | 24917.15    |
| 1839803.32  | 733106.85  | 1634829.49  | 2362553.78  | 722812.58  | 718375.82  | 654944.32  | 656000.86  | 2812370.69  |
| 626235.10   | 258087.15  | 589436.11   | 630174.58   | 250920.61  | 253602.89  | 233616     | 232565.56  | 769207.63   |
| 135496.22   | 53837.52   | 114556.36   | 127794.83   | 51627.94   | 51968.48   | 47729.34   | 47690.86   | 216645.76   |
| 9207082.69  | 4459998.91 | 7817726.80  | 14949943.99 | 4448277.35 | 4409499.38 | 4019033.38 | 4014381.89 | 13591496.67 |
| 62165.76    | 25348.40   | 43406.76    | 62865.82    | 24996.85   | 25307.41   | 22988.93   | 23095.11   | 102606.14   |
| 2586788.35  | 1068734.95 | 2195017.79  | 3720675.26  | 1068908.20 | 1055400.18 | 957282.73  | 967212.45  | 4348410.02  |
| 58994       | 3184.50    | 48604       | 2498.37     | 2227.54    | 2197.36    | 2332       | 2517.78    | 31291.24    |
| 3850920.98  | 1298174.13 | 3517233.89  | 4132882.49  | 1272474.60 | 1253513.47 | 1148438.84 | 1154867.30 | 4479733.71  |
| 711536.41   | 260976.19  | 598402.92   | 922949.16   | 256907.67  | 253431.12  | 232084.53  | 233979.66  | 990366.29   |
| 3646380.12  | 1521597.57 | 3159974.96  | 5988421.96  | 1533442.17 | 1495812.77 | 1359467.63 | 1371053.66 | 6963794.26  |
| 3282700.71  | 2267758.71 | 2696989.79  | 5690561.40  | 2252525.43 | 2276436.72 | 2084925.12 | 2058456.30 | 5463351.69  |
| 9738434.94  | 3709146.25 | 8480227.66  | 12926217.69 | 3690990.74 | 3641825.32 | 3312297.14 | 3319939.30 | 13070861.50 |
| 4238159.62  | 3057630.38 | 3434011.11  | 7904686.56  | 3048361.33 | 3076432.64 | 2812949.46 | 2779745.91 | 7266774.80  |
| 5568861.20  | 1878764.30 | 4883410.57  | 7581496.07  | 1873695.34 | 1828364.84 | 1650400.32 | 1675762.84 | 11675519.36 |
| 0           | 0          | 0           | 0           | 0          | 0          | 0          | 0          | 50          |
| 286164.11   | 105395.54  | 260418.52   | 195054.50   | 100223.39  | 103708.22  | 93609.12   | 94236.72   | 361409.58   |
| 183081.43   | 226964.45  | 165940.73   | 190719.80   | 216701.02  | 228222.42  | 212211.29  | 205498.50  | 222127.11   |
| 2237690.27  | 1109541.19 | 1906713.99  | 2754307.09  | 1083210.29 | 1096910.65 | 1003110.57 | 1000383.54 | 3858463.00  |
| 48610.19    | 2931.91    | 47335.93    | 2457.48     | 2168.36    | 2388.79    | 1808.77    | 3085.44    | 97323.86    |
| 3858449.34  | 730490.76  | 3750472.74  | 1476550.14  | 651344.62  | 664441.91  | 612352.46  | 634123.09  | 3312396.68  |
| 4395574.97  | 349314.40  | 3915241.84  | 439130.36   | 243711.75  | 258548.29  | 241268.48  | 270978.33  | 4348895.99  |
| 480827.17   | 72456.81   | 454526.66   | 84774.01    | 64118.67   | 68494.26   | 58583.59   | 65842.76   | 533102.64   |
| 13701742.13 | 6830756.30 | 11605647.03 | 15607291.27 | 6580574.02 | 6715333.27 | 6182871.97 | 6141929.98 | 19810614.48 |
| 2580329.91  | 1266118.41 | 2162649.20  | 3129045.28  | 1234112.01 | 1260173.27 | 1139067.74 | 1140322.60 | 4678594.22  |
| 631988.24   | 242721.08  | 532441.79   | 697316.23   | 237294.09  | 241208.12  | 214887.24  | 216310.61  | 959837.53   |
| 2716948.87  | 1155016.71 | 2300045.95  | 3614947.53  | 1133985.19 | 1132752.19 | 1028676.49 | 1033514.18 | 3717473.24  |

|            |            |            |            |            |            |            |            |            |
|------------|------------|------------|------------|------------|------------|------------|------------|------------|
| 340971.64  | 19886.18   | 313004.02  | 133189.32  | 16438.48   | 14253.91   | 13217.37   | 16371.82   | 294112.30  |
| 3015363.98 | 932926.64  | 2612156.70 | 2403196.61 | 876348.06  | 881194.90  | 814615.71  | 821318.44  | 3741503.04 |
| 1522875.94 | 562571.18  | 1340406.31 | 1874499.39 | 558952.53  | 550464.69  | 498746.06  | 504753.77  | 2236045.74 |
| 4425737.85 | 1260460.66 | 3826724.67 | 5124766.88 | 1233224.03 | 1195159.34 | 1077235.30 | 1105038.69 | 6757544.94 |
| 617494.62  | 78631.94   | 540091.88  | 262361.55  | 70081.53   | 67836.45   | 64215.24   | 66980.26   | 516667.91  |
| 125877.90  | 51284.27   | 103888.77  | 125630.16  | 49686.82   | 50859.37   | 46142.81   | 46853.44   | 190193.09  |
| 48092.40   | 46686.68   | 46155.52   | 4371.75    | 43496.43   | 46316.05   | 43141.90   | 41774.22   | 103137.91  |

| C19        | C2          | C20        | C3          | C4         | C5         | C6          | C7         | C8          |
|------------|-------------|------------|-------------|------------|------------|-------------|------------|-------------|
| 2931826.98 | 4644262.67  | 2321042.75 | 5488044.22  | 2706835.10 | 2216465.97 | 4794653.69  | 3688438.23 | 4562254.93  |
| 6107963.05 | 6799261.79  | 4819535.47 | 7857722.21  | 4334388.61 | 4355159.92 | 7887907.32  | 6237511.70 | 6222119.97  |
| 1196603.21 | 1615045.40  | 853490.17  | 2366522.66  | 1071239.54 | 885005.74  | 1602570.45  | 1102194.09 | 1466181.57  |
| 32039.37   | 37238.14    | 25196.23   | 57421.65    | 21156.23   | 23423.86   | 41324.43    | 30715.89   | 25575.02    |
| 54172.12   | 40327.29    | 46900.88   | 80595.39    | 26107.39   | 27221.63   | 92626.41    | 33622.86   | 49952.26    |
| 1038001.91 | 2024549.78  | 831839.72  | 2418719.91  | 1132080.53 | 780828.10  | 2308210.91  | 1169414.70 | 2088702.30  |
| 3338       | 46097.68    | 4810.64    | 34328.34    | 21787.82   | 4870.18    | 21961.15    | 6400.18    | 60004.68    |
| 895042.05  | 1598697.38  | 723632.73  | 1847391.16  | 889283.17  | 722661.73  | 1824851.15  | 1176436.27 | 1594990.03  |
| 342799.07  | 515553.93   | 278432.72  | 544126.38   | 306000.05  | 262857.43  | 482286.97   | 342538.13  | 551837.18   |
| 67961.51   | 133478.55   | 52738.22   | 139171.81   | 55618.94   | 51807.73   | 109277.42   | 70598.41   | 119498.71   |
| 5798787.27 | 8059086.50  | 4555467.38 | 9716324.11  | 5020003.20 | 4375303.43 | 10089756.69 | 7387685.31 | 7927099.60  |
| 40937.56   | 51216.72    | 32004.35   | 57944.19    | 39582.65   | 25383.81   | 48967.98    | 34589.46   | 41981.76    |
| 1620124.22 | 2158868.38  | 1309408.27 | 2621156.64  | 1303902.13 | 1049040.90 | 2400503.56  | 1755040.65 | 2148061.47  |
| 3620       | 54577.01    | 4093.98    | 38828       | 19835.49   | 5004.51    | 30455.99    | 5897.51    | 50205.01    |
| 1554517.34 | 3139945.74  | 1268156.11 | 3362744.14  | 1682163.94 | 1277218.26 | 3372867.52  | 2227322.96 | 3261706.38  |
| 317742.18  | 537463.75   | 255404.56  | 602505      | 361093.02  | 254546.10  | 476872.21   | 653279.98  | 582210.65   |
| 2113109.59 | 3190669.46  | 1840818.88 | 3913456.50  | 1795263    | 1501972.73 | 3632024.85  | 2811740.78 | 3193287.83  |
| 2920109.12 | 3011371.57  | 2264851.94 | 3513868.32  | 2023337.95 | 2193655.45 | 3468527.59  | 2984837.50 | 2736244.91  |
| 4985005.20 | 8164899.26  | 4089109.81 | 9446576.58  | 4948130.25 | 3730704.26 | 9728261.66  | 6494734.78 | 8500281.51  |
| 4114041.76 | 3962343.66  | 3182765.48 | 4482577.04  | 2661430.23 | 2932798.96 | 4672209.51  | 4030581.05 | 3450404.23  |
| 2629697.23 | 4551022.88  | 2176700.98 | 5525201.63  | 2531085.69 | 1884816.45 | 4968750.53  | 3514502.25 | 4792907.43  |
| 0          | 0           | 0          | 0           | 417        | 0          | 11          | 15         | 0           |
| 136405.87  | 253500.11   | 118504.83  | 383060.81   | 124503.38  | 105237.54  | 346069.52   | 142529.60  | 252275.54   |
| 193432.19  | 223401.98   | 154816.88  | 246561.82   | 113622.70  | 207651.42  | 256380.31   | 280992.23  | 158482.12   |
| 1394415.94 | 1966060.01  | 1127581.42 | 2166552.82  | 1231924.04 | 1071495.78 | 2016694.85  | 1526652.38 | 1851188.57  |
| 21668.75   | 32601.56    | 22856.72   | 49526.29    | 14661.91   | 3094.51    | 57665.44    | 4972.94    | 37273.29    |
| 824039.44  | 2768129.98  | 733148.83  | 2749262.99  | 1407620.38 | 725882.94  | 3557770.31  | 1232183.15 | 3297874.43  |
| 430432.26  | 3885363.63  | 441151.20  | 3230367.74  | 1510076.75 | 386544.96  | 2413317.28  | 551575.92  | 3885778.67  |
| 176100.52  | 319659.05   | 158034.64  | 440671.23   | 170022.42  | 72627.77   | 472120.75   | 99586      | 401975.33   |
| 7756591.95 | 12048920.31 | 6311569.68 | 12614647.78 | 7191732.93 | 6613029.10 | 14010492.54 | 9044103.47 | 12136888.12 |
| 1538480.48 | 2213515.99  | 1247996.54 | 2663786.94  | 1337534.77 | 1227400.35 | 2257091.67  | 1795311.85 | 2147851.68  |
| 349818.64  | 557825.23   | 254112.81  | 807922.86   | 349364.36  | 259657.94  | 619434.80   | 400066.50  | 572344.64   |
| 1481960.87 | 2269193.97  | 1152105.73 | 2519727.37  | 1395218.13 | 1105003.42 | 2448456.22  | 1794546.39 | 2255374.14  |

|            |            |            |            |            |            |            |            |            |
|------------|------------|------------|------------|------------|------------|------------|------------|------------|
| 37857.14   | 226730.30  | 43294.57   | 213537.98  | 105728.97  | 27189.60   | 144587.24  | 72961.78   | 294535.13  |
| 970791.74  | 2658290.27 | 883300.64  | 2517196.20 | 1337563.67 | 896171.84  | 2223062.79 | 1448052.17 | 2476626.77 |
| 848192.77  | 1267502.43 | 682319.45  | 1468926.78 | 718772.20  | 564810.50  | 1542327.36 | 1007354.61 | 1269365.74 |
| 1604462.74 | 3712895.86 | 1357588.69 | 4479380.99 | 1924870.34 | 1255775.98 | 3663118.69 | 2572063.27 | 3673296.43 |
| 102815.03  | 489673.28  | 98172.31   | 403862.57  | 214873.44  | 89503.69   | 338134.22  | 161672.64  | 524556.30  |
| 77000.93   | 87611.80   | 64473.32   | 112413.49  | 60479.36   | 48887.98   | 114778.81  | 67808.47   | 102442.15  |
| 16876.40   | 54908.46   | 21271.54   | 67872.80   | 16007.52   | 44059.79   | 41660.48   | 21110.21   | 43458.86   |



| C9          | D1         | D10        | D11        | D12         | D13         | D14         | D15         |
|-------------|------------|------------|------------|-------------|-------------|-------------|-------------|
| 5427248.04  | 2761798.11 | 2228422.87 | 2073576.37 | 6923801.36  | 5772277.23  | 5294505.40  | 4468438.79  |
| 7054867.24  | 5226948.02 | 4449703.34 | 4190430.97 | 11278650.30 | 8290395.98  | 7022616.09  | 6615974.93  |
| 1867954.72  | 999830.53  | 870304.23  | 814499.66  | 1802705.96  | 1916524.16  | 1762447.99  | 1559359.01  |
| 29097.50    | 25916.45   | 23616.10   | 22417.79   | 55510.08    | 47557.55    | 26477.37    | 28012.46    |
| 38113.22    | 45122.62   | 26788.56   | 23769.36   | 58295.87    | 69767.60    | 55637.38    | 40391.82    |
| 2574242.03  | 1051920.17 | 789317.77  | 716983.01  | 2082279.51  | 2409770.25  | 2450542.82  | 2033388.43  |
| 73818.34    | 12592.16   | 2522       | 2499.66    | 5280.34     | 47079.36    | 65159.02    | 45240.64    |
| 1787449.29  | 876211.35  | 717989.15  | 667946.25  | 2166324.68  | 1946113.52  | 1834347.46  | 1538628.39  |
| 614398.75   | 328362.63  | 251130.18  | 237214.88  | 582040.62   | 618418.23   | 629441.60   | 487930.64   |
| 135268.15   | 66151.65   | 52488.40   | 48817.36   | 118421.22   | 151128.05   | 123837.19   | 120583.99   |
| 9142728.21  | 5289938.47 | 4392746.42 | 4081608.70 | 13612933.35 | 9754024.26  | 9289672.57  | 8115179.52  |
| 58209.13    | 32675.91   | 24783.12   | 23118.81   | 57751.45    | 68922.72    | 53752.21    | 55274.79    |
| 2463898.75  | 1454299.44 | 1052008.38 | 983934.07  | 3386188.88  | 2832728.20  | 2373274.77  | 2160027.68  |
| 64176       | 10384      | 2301.20    | 2687.49    | 4433.51     | 50428.02    | 49997       | 41437.98    |
| 3851161.39  | 1630086.50 | 1255620.95 | 1174469.09 | 3814088.67  | 3745102.29  | 4000467.51  | 3036552.47  |
| 690122.22   | 310483.66  | 253110.54  | 237270.84  | 847679.43   | 725113.65   | 619257.99   | 567880.88   |
| 3643941.05  | 2077818.83 | 1503776.53 | 1397511.84 | 5441257.48  | 4231301.06  | 3652339.34  | 2931915.37  |
| 2979718.57  | 2461555.05 | 2241410.76 | 2116957.10 | 5148002.94  | 3747584.55  | 3049981.53  | 2937552.25  |
| 9507518.49  | 4880694.14 | 3650118.04 | 3384893.09 | 11823450.79 | 9980296.70  | 9556165.53  | 7643588.38  |
| 3778387.57  | 3374518.86 | 3025059.63 | 2862701.58 | 7128456.47  | 4995564.39  | 3821086.97  | 3769729.91  |
| 5481992.69  | 2650936.09 | 1851153.74 | 1704152.11 | 6934403.27  | 6639261.78  | 5485131.74  | 4485599.27  |
| 0           | 0          | 0          | 0          | 0           | 0           | 0           | 0           |
| 273957.55   | 138814.35  | 104577.40  | 96402.28   | 183566.36   | 293968      | 284642.11   | 226080.07   |
| 164570.18   | 171606.60  | 222361.94  | 214200.04  | 175356.14   | 246796.21   | 174453.44   | 180333.98   |
| 2240229.25  | 1293974.14 | 1091325.02 | 1022666.38 | 2529119.08  | 2452139.06  | 2120335.14  | 1885411.94  |
| 48228.67    | 20669.98   | 2668.21    | 1764.69    | 4050.71     | 54544.16    | 52026.37    | 36248.94    |
| 3896318.51  | 1056940.55 | 676127.62  | 618680.94  | 1473226.19  | 3346207.37  | 4201212     | 2755409.59  |
| 5001240.37  | 954798.41  | 309444.21  | 249338.42  | 594144.08   | 3691295.22  | 4212738.22  | 3178059.36  |
| 459261.44   | 179854.57  | 71368.45   | 61241.45   | 92991.88    | 443981.97   | 511255.30   | 363527.74   |
| 14473709.70 | 7428787.76 | 6696011.25 | 6244275.19 | 14426626.81 | 14019187.07 | 13253594.96 | 11407667.56 |
| 2383376.27  | 1452816.93 | 1258125.93 | 1169998.24 | 2873652.03  | 2793345.46  | 2345094.37  | 2230191.01  |
| 644557.58   | 320191.97  | 243689.94  | 218356.16  | 643866.13   | 682434.39   | 676208.28   | 533855.60   |
| 2735621.61  | 1410412.41 | 1139740.93 | 1050102.36 | 3320500.19  | 2642919.33  | 2551615.61  | 2255531.86  |

|            |            |            |            |            |            |            |            |
|------------|------------|------------|------------|------------|------------|------------|------------|
| 353192     | 76850.85   | 15938.37   | 14250.14   | 132243.91  | 280382.70  | 317359.21  | 229970.47  |
| 3229727    | 1153552.04 | 896177.61  | 835219.74  | 2268244.71 | 2829599.43 | 2843497.11 | 2310161.86 |
| 1458340.50 | 774119.29  | 549855.86  | 510635.94  | 1716058.21 | 1652845.39 | 1585560.75 | 1271159.85 |
| 4467473.01 | 1800254.79 | 1238851.92 | 1122721.95 | 4733518.90 | 4401405.46 | 4134198.22 | 3453294.87 |
| 635880.13  | 157188.74  | 70073.44   | 67529.08   | 258222.04  | 532152.80  | 550499.02  | 415060.20  |
| 124336.98  | 69668.96   | 50400.33   | 46745.95   | 116197.39  | 121849.01  | 121722.91  | 93079.86   |
| 50146.05   | 31435.77   | 45356.36   | 44083.99   | 5476.38    | 56081.86   | 48207.47   | 43310.31   |

| D16         | D17        | D18        | D19        | D2          | D20        | D3          | D4         | D5          |
|-------------|------------|------------|------------|-------------|------------|-------------|------------|-------------|
| 5040732.09  | 3675181.14 | 2272281    | 2113118.75 | 6380348.40  | 2249228.04 | 8007886.95  | 3235862.37 | 7970505.02  |
| 8619818.40  | 6068228.22 | 4599262.57 | 4356217.63 | 8954840.63  | 4385594.07 | 13098640.54 | 4213027.97 | 10394961.26 |
| 1426386.29  | 1005226.59 | 887364.65  | 841116.23  | 2142684.31  | 863355.35  | 2087391.04  | 1081574.19 | 3168638.47  |
| 42863.51    | 30285.41   | 24083.02   | 23080.21   | 43776       | 21907.29   | 64178.16    | 17385.67   | 63920.82    |
| 45800.43    | 32064.41   | 26402.83   | 25008.57   | 66249.76    | 25966.85   | 68944.10    | 17918      | 104646.39   |
| 1532866.67  | 1049117.34 | 779464.87  | 723795.37  | 2759278.90  | 819349.42  | 2398059.91  | 1602451.94 | 4264477.22  |
| 2928        | 1119.68    | 2432.27    | 1576.14    | 82392.16    | 5628.14    | 6372.68     | 50202.32   | 2958.68     |
| 1589760.05  | 1157814.66 | 734766.51  | 682273.12  | 2265608.86  | 730218.38  | 2506999.44  | 1096317.02 | 2159573.60  |
| 448648.72   | 309723.49  | 258980.62  | 243308.41  | 775820.74   | 257029.92  | 679008.34   | 381781.11  | 476308.58   |
| 91304.55    | 63049.93   | 52818.76   | 49779.51   | 178078.89   | 53012.71   | 138434.09   | 80310.99   | 172203.78   |
| 9968769.28  | 7652939.81 | 4522320.29 | 4217206.34 | 11074856.04 | 4420570.31 | 15772229.70 | 5471881.85 | 13205733.94 |
| 45053.76    | 30988.98   | 25726.40   | 24120.65   | 64018.55    | 25775.80   | 66547.05    | 34850.83   | 68650.77    |
| 2469227.57  | 1749369.35 | 1081620.97 | 1006078.09 | 3038125.93  | 1067048.56 | 3932179.43  | 1479656.49 | 3304818.55  |
| 3144        | 1153.01    | 2286.25    | 1467.48    | 79550.51    | 4555.48    | 5387.51     | 41592.99   | 3269.01     |
| 2782973.32  | 2267049.53 | 1287393.60 | 1189297.03 | 4601929.26  | 1314546.60 | 4416288.45  | 2350153.56 | 3389832.77  |
| 611787.25   | 880448.05  | 261527.04  | 241832.64  | 782000.98   | 261153.26  | 977367.70   | 440736.92  | 946167.97   |
| 3885609.07  | 2938134.60 | 1533165.69 | 1419744.34 | 4362139.78  | 1497644.62 | 6326961.96  | 2146493.92 | 4692249.84  |
| 4023857.76  | 2918559.79 | 2321122.44 | 2211370.84 | 3905327.14  | 2191431.75 | 5983678.11  | 1765226.39 | 4855106.97  |
| 8575050.83  | 6708043.46 | 3722236.96 | 3452121.30 | 11893564.26 | 3716345.30 | 13736516.31 | 5708483.59 | 9772352.58  |
| 5556904.07  | 3928710.51 | 3142482.52 | 2992262.66 | 5049446.91  | 2938603.36 | 8291604.33  | 2187099.95 | 6208967.69  |
| 4903841.64  | 3573238.68 | 1875560.77 | 1717534.89 | 6619455.93  | 1905149.31 | 8056894.90  | 3309511.21 | 6165410.36  |
| 0           | 6          | 0          | 0          | 2244        | 0          | 0           | 75         | 0           |
| 149079.85   | 143506.77  | 103287.56  | 97856.45   | 396182.28   | 105423.43  | 214499.35   | 168105.13  | 266910.08   |
| 194943.70   | 355946.29  | 231452.40  | 226904.83  | 263623.44   | 210523.51  | 203252.33   | 105167.32  | 220578.09   |
| 1948861.90  | 1492136.49 | 1113926.38 | 1054812.05 | 2662572.28  | 1085419.68 | 2934613.67  | 1351329    | 3041437.95  |
| 2830.82     | 1496.34    | 2030.13    | 1500.85    | 63907.30    | 4343.99    | 4577.21     | 29735.66   | 60191.64    |
| 1108522.42  | 1170442.63 | 684188.75  | 613941.02  | 4060207.37  | 799243.73  | 1681982.28  | 2479160.65 | 2370610.40  |
| 381735.37   | 235179.60  | 244160.19  | 195296.59  | 5201778.39  | 442124.58  | 689670.88   | 3080344.82 | 3380980.25  |
| 75763.01    | 73434.72   | 64865.83   | 59075.28   | 594418.37   | 83795.52   | 110601.77   | 298463.60  | 287217.79   |
| 11252295.22 | 8549079.41 | 6825230.33 | 6473034.99 | 15921044.81 | 6648720.67 | 16668233.55 | 8700383.23 | 19710487.08 |
| 2214875.74  | 1832446.95 | 1267858.13 | 1201063.49 | 2986115.55  | 1238014.59 | 3332363.94  | 1438231.40 | 4708457.51  |
| 476948.50   | 419557.03  | 240303.35  | 224507.04  | 817037.19   | 243327.61  | 749718.08   | 372505.59  | 747637.19   |
| 2431371.91  | 1770272.94 | 1149987.48 | 1074785.47 | 3119692.66  | 1150530.12 | 3843174.66  | 1635440.59 | 4324366.49  |

|            |            |            |            |            |            |            |            |            |
|------------|------------|------------|------------|------------|------------|------------|------------|------------|
| 81500.77   | 64734.90   | 14785.20   | 9529.23    | 380036.67  | 30515.61   | 153740.86  | 233984.28  | 134215.07  |
| 1685976.10 | 1406566    | 897314.32  | 836513.65  | 3431980.96 | 921639.32  | 2611296.85 | 1961982.76 | 3694207.86 |
| 1253283.29 | 1070806.86 | 563091.68  | 520046.68  | 1854406.91 | 565169.07  | 1991037.37 | 878702.55  | 1607236.47 |
| 3299346.99 | 2791322.97 | 1219101.71 | 1109513.68 | 4992491.49 | 1277450.97 | 5485124.86 | 2597731.94 | 6656845.09 |
| 177249.53  | 142884.09  | 70172.85   | 59733.01   | 751134.65  | 88471.46   | 299578.26  | 407419.07  | 243998.70  |
| 89259.46   | 61908.50   | 51354.71   | 48370.63   | 128775.29  | 52066.62   | 134386.67  | 79824.32   | 179020     |
| 20344.72   | 2910.18    | 46589.01   | 46338.31   | 52631.41   | 42494.50   | 6932.82    | 30177.66   | 53689.25   |

| D6          | D7          | D8         | D9          |
|-------------|-------------|------------|-------------|
| 5837235.59  | 6017283.28  | 2086672.94 | 5999616.32  |
| 7945811.61  | 8338683.18  | 4098161.43 | 7941101.82  |
| 2037273.90  | 2044536.24  | 814918.64  | 2252015.80  |
| 34132.87    | 46029.09    | 21443      | 38476.36    |
| 54216.76    | 66178.32    | 24854.65   | 58488.36    |
| 2732641.90  | 2783734.80  | 755014.55  | 2996555.83  |
| 73560.38    | 74190.02    | 4436.18    | 50216.14    |
| 2014367.70  | 2133086.86  | 677967.95  | 1866174.36  |
| 702688.77   | 725187.07   | 239109.88  | 562687.67   |
| 152611.11   | 178494.37   | 49422.95   | 148011.63   |
| 10333621.48 | 10175815.88 | 4094274    | 10222307.83 |
| 68224.19    | 60751.59    | 23219.96   | 58541.57    |
| 2657572.13  | 2840794.15  | 988640.86  | 2688488.67  |
| 62239.57    | 71785.01    | 3920.01    | 44749.91    |
| 4101158.40  | 4224357.65  | 1207892.86 | 3594731.20  |
| 727102.68   | 751861.49   | 239192.99  | 748131.17   |
| 3947769.64  | 4301370.88  | 1419210.53 | 3889142.56  |
| 3459317.31  | 3670134.71  | 2050879.81 | 3521066.51  |
| 10248915.52 | 11127657.48 | 3466220.48 | 9640911.25  |
| 4422054.60  | 4629268.22  | 2761900.58 | 4476849.44  |
| 5931972.06  | 6415805.62  | 1767412.09 | 5710344.40  |
| 0           | 0           | 0          | 0           |
| 286674.04   | 322567.37   | 100180.66  | 270721.48   |
| 201307.55   | 226640.54   | 200170.61  | 182379.70   |
| 2400383.13  | 2477575.17  | 1014498.56 | 2414825.49  |
| 52978.94    | 58979.59    | 3470.48    | 50776.62    |
| 4391925.79  | 3921280.87  | 697569.36  | 3347425.93  |
| 4877011.74  | 5220914.16  | 390257.25  | 4536312.77  |
| 493721.66   | 505681.01   | 76775.73   | 410467.27   |
| 16235723.53 | 16267317.44 | 6223270.68 | 15474603.88 |
| 2681304.15  | 2827337.57  | 1164744.09 | 3051830.80  |
| 716365.02   | 722675.80   | 233527.17  | 708208.96   |
| 2903868.28  | 2942401.07  | 1065087.21 | 3153357.79  |

|            |            |            |            |
|------------|------------|------------|------------|
| 363550.61  | 377275.19  | 23706.71   | 282266.08  |
| 3259431.75 | 3346365.89 | 860960.97  | 3240061    |
| 1629863.13 | 1702219.61 | 522722.71  | 1472400.33 |
| 4608913.36 | 4897754.52 | 1183671.95 | 5070756.77 |
| 623007.50  | 685890.60  | 78586.07   | 489447.24  |
| 127732.11  | 129126.91  | 47528.99   | 133893.40  |
| 57501.16   | 61929.62   | 41096.07   | 61649.18   |
