# Supplementary material for: Bacterial Colonization in the Airways and Intestines of Twin and Singleton Preterm Neonates: A Single‐Center Study
Source: Hindawi journal article supplement (doi:10.1155/2023/2973605), 2023-01-01
Supplement: f1 [file 2973605.f1.zip]

Sample gene sequences were annotated using the KEGG database on metabolic pathways based on their metabolic function prediction using PICRUSt2.

KEGGLevel3

Vasopressin-regulated water reabsorption

Transcription machinery

DNA repair and recombination proteins

Pantothenate and CoA biosynthesis

Primary immunodeficiency

NOD-like receptor signaling pathway

Drug metabolism - other enzymes

Phototransduction

Transporters

Biosynthesis of ansamycins

Biosynthesis of unsaturated fatty acids

Citrate cycle (TCA cycle)

Influenza A

Xylene degradation

Systemic lupus erythematosus

Prostate cancer

Starch and sucrose metabolism

Glycosyltransferases

Drug metabolism - cytochrome P450

Bacterial invasion of epithelial cells

Sulfur metabolism

Olfactory transduction

One carbon pool by folate

Other ion-coupled transporters

Bisphenol degradation

Glycosphingolipid biosynthesis - lacto and neolacto series

Glycerolipid metabolism

Tropane, piperidine and pyridine alkaloid biosynthesis

Lipid metabolism

Histidine metabolism

Benzoate degradation

G protein-coupled receptors

Renin-angiotensin system

Tryptophan metabolism  
Gastric acid secretion  
Secondary bile acid biosynthesis  
D-Arginine and D-ornithine metabolism  
Nitrotoluene degradation  
Other glycan degradation  
Steroid hormone biosynthesis  
Peptidases  
Transcription factors  
Salivary secretion  
Electron transfer carriers  
Stilbenoid, diarylheptanoid and gingerol biosynthesis  
Viral myocarditis  
mRNA surveillance pathway  
Other transporters  
Biotin metabolism  
Prenyltransferases  
D-Glutamine and D-glutamate metabolism  
Leishmaniasis  
Proteasome  
Melanogenesis  
Photosynthesis - antenna proteins  
Toluene degradation  
Chaperones and folding catalysts  
Protein processing in endoplasmic reticulum  
Valine, leucine and isoleucine biosynthesis  
Phenylpropanoid biosynthesis  
Folate biosynthesis  
Glycosphingolipid biosynthesis - ganglio series  
Cell motility and secretion  
Pathways in cancer  
Transcription related proteins  
Phosphatidylinositol signaling system  
p53 signaling pathway

GnRH signaling pathway  
C5-Branched dibasic acid metabolism  
Lysine biosynthesis  
Pertussis  
Butirosin and neomycin biosynthesis  
Type II diabetes mellitus  
Ascorbate and aldarate metabolism  
Apoptosis  
Oocyte meiosis  
Neuroactive ligand-receptor interaction  
Butanoate metabolism  
Styrene degradation  
Alzheimer's disease  
Carbon fixation in photosynthetic organisms  
Vibrio cholerae pathogenic cycle  
Glyoxylate and dicarboxylate metabolism  
Secretion system  
Insulin signaling pathway  
Methane metabolism  
Aminobenzoate degradation  
Retinol metabolism  
Zeatin biosynthesis  
Pores ion channels  
Isoflavonoid biosynthesis  
Fc gamma R-mediated phagocytosis  
ABC transporters  
Fluorobenzoate degradation  
RIG-I-like receptor signaling pathway  
Renal cell carcinoma  
Lysine degradation  
Germination  
Ribosome  
Pancreatic secretion  
Amino acid metabolism

Protein export  
Hypertrophic cardiomyopathy (HCM)  
DNA replication proteins  
Betalain biosynthesis  
Notch signaling pathway  
Photosynthesis proteins  
Aldosterone-regulated sodium reabsorption  
Primary bile acid biosynthesis  
Colorectal cancer  
Cellular antigens  
Bile secretion  
Protein digestion and absorption  
Chloroalkane and chloroalkene degradation  
Protein folding and associated processing  
Energy metabolism  
Oxidative phosphorylation  
African trypanosomiasis  
Amino sugar and nucleotide sugar metabolism  
Nitrogen metabolism  
Restriction enzyme  
Limonene and pinene degradation  
General function prediction only  
Purine metabolism  
Amoebiasis  
Bladder cancer  
Biosynthesis of type II polyketide products  
Staphylococcus aureus infection  
Pentose and glucuronate interconversions  
Spliceosome  
Ethylbenzene degradation  
Ubiquinone and other terpenoid-quinone biosynthesis  
Basal transcription factors  
Endocytosis  
Sphingolipid metabolism

Glutathione metabolism  
Hematopoietic cell lineage  
Chagas disease (American trypanosomiasis)  
Cytochrome P450  
Linoleic acid metabolism  
Base excision repair  
Homologous recombination  
Plant-pathogen interaction  
Glycine, serine and threonine metabolism  
Fatty acid biosynthesis  
Inositol phosphate metabolism  
Chromosome  
Various types of N-glycan biosynthesis  
Lipoic acid metabolism  
N-Glycan biosynthesis  
Amino acid related enzymes  
Phosphonate and phosphinate metabolism  
Nicotinate and nicotinamide metabolism  
Pyruvate metabolism  
Tuberculosis  
Non-homologous end-joining  
Peroxisome  
Pyrimidine metabolism  
Flagellar assembly  
Glycosphingolipid biosynthesis - globo series  
Metabolism of xenobiotics by cytochrome P450  
Huntington's disease  
Ion channels  
Glycerophospholipid metabolism  
Lipopolysaccharide biosynthesis proteins  
PPAR signaling pathway  
Sesquiterpenoid biosynthesis  
Tyrosine metabolism  
Glutamatergic synapse

Vascular smooth muscle contraction  
alpha-Linolenic acid metabolism  
Penicillin and cephalosporin biosynthesis  
Mineral absorption  
Chlorocyclohexane and chlorobenzene degradation  
Sulfur relay system  
Polyketide sugar unit biosynthesis  
beta-Alanine metabolism  
Cysteine and methionine metabolism  
Ubiquitin system  
Pentose phosphate pathway  
Thiamine metabolism  
Riboflavin metabolism  
Bacterial toxins  
Proximal tubule bicarbonate reclamation  
Atrazine degradation  
Biosynthesis of vancomycin group antibiotics  
Prion diseases  
Arginine and proline metabolism  
Cardiac muscle contraction  
Signal transduction mechanisms  
Caprolactam degradation  
Alanine, aspartate and glutamate metabolism  
Phenylalanine, tyrosine and tryptophan biosynthesis  
Glycosaminoglycan degradation  
Caffeine metabolism  
Others  
Two-component system  
Parkinson's disease  
Taurine and hypotaurine metabolism  
Ribosome biogenesis in eukaryotes  
Carotenoid biosynthesis  
Ribosome Biogenesis  
Nucleotide metabolism

Aminoacyl-tRNA biosynthesis  
RNA polymerase  
Biosynthesis of siderophore group nonribosomal peptides  
RNA transport  
Toxoplasmosis  
Ether lipid metabolism  
Epithelial cell signaling in Helicobacter pylori infection  
DNA replication  
Cytoskeleton proteins  
Lipid biosynthesis proteins  
Biosynthesis of type II polyketide backbone  
Membrane and intracellular structural molecules  
Carbohydrate digestion and absorption  
Meiosis - yeast  
Cyanoamino acid metabolism  
Chronic myeloid leukemia  
Glioma  
beta-Lactam resistance  
Synthesis and degradation of ketone bodies  
Adipocytokine signaling pathway  
Neurotrophin signaling pathway  
Novobiocin biosynthesis  
Wnt signaling pathway  
Biosynthesis and biodegradation of secondary metabolites  
Selenocompound metabolism  
Cell division  
Isoquinoline alkaloid biosynthesis  
Progesterone-mediated oocyte maturation  
Arachidonic acid metabolism  
Bacterial chemotaxis  
Nucleotide excision repair  
Geraniol degradation  
Lipopolysaccharide biosynthesis  
Mismatch repair

Sporulation  
Flavonoid biosynthesis  
Small cell lung cancer  
Endocrine and other factor-regulated calcium reabsorption  
Translation proteins  
Flavone and flavonol biosynthesis  
Peptidoglycan biosynthesis  
Inorganic ion transport and metabolism  
RNA degradation  
Galactose metabolism  
Indole alkaloid biosynthesis  
Amyotrophic lateral sclerosis (ALS)  
Glycan biosynthesis and metabolism  
Cell cycle - Caulobacter  
Antigen processing and presentation  
Carbon fixation pathways in prokaryotes  
Protein kinases  
Metabolism of cofactors and vitamins  
Function unknown  
Dioxin degradation  
D-Alanine metabolism  
Translation factors  
Steroid biosynthesis  
Type I diabetes mellitus  
Polycyclic aromatic hydrocarbon degradation  
Bacterial motility proteins  
Vibrio cholerae infection  
Fatty acid metabolism  
Terpenoid backbone biosynthesis  
Long-term potentiation  
Fatty acid elongation in mitochondria  
Porphyrin and chlorophyll metabolism  
Phototransduction - fly  
Cholinergic synapse



Vitamin B6 metabolism  
Photosynthesis  
Fructose and mannose metabolism  
Shigellosis  
Streptomycin biosynthesis  
Glycolysis / Gluconeogenesis  
Replication, recombination and repair proteins  
Phenylalanine metabolism  
Bacterial secretion system  
Carbohydrate metabolism  
Phosphotransferase system (PTS)  
Lysosome  
VEGF signaling pathway  
Valine, leucine and isoleucine degradation  
Tetracycline biosynthesis  
Naphthalene degradation  
Biosynthesis of 12-, 14- and 16-membered macrolides  
ErbB signaling pathway  
Propanoate metabolism  
Calcium signaling pathway  
MAPK signaling pathway - yeast

| description                                                | A1         | A10        | A11         |
|------------------------------------------------------------|------------|------------|-------------|
| Vasopressin-regulated water reabsorption                   |            | 0          | 0           |
| Transcription machinery                                    | 1362324.66 | 1054213.06 | 786408.33   |
| DNA repair and recombination proteins                      | 5013687.86 | 3625689.87 | 3835134.36  |
| Pantothenate and CoA biosynthesis                          | 962729.61  | 718600.21  | 606141.06   |
| Primary immunodeficiency                                   | 114033.24  | 78037.28   | 103653.46   |
| NOD-like receptor signaling pathway                        | 54224.65   | 49342.61   | 5941.23     |
| Drug metabolism - other enzymes                            | 316430.13  | 212517.69  | 309013.30   |
| Phototransduction                                          |            | 0          | 0           |
| Transporters                                               | 9333113.97 | 6079954.70 | 11373606.80 |
| Biosynthesis of ansamycins                                 | 76222.08   | 55767.98   | 54112.25    |
| Biosynthesis of unsaturated fatty acids                    | 483450.77  | 403545.36  | 143407.30   |
| Citrate cycle (TCA cycle)                                  | 1448594.27 | 1152211.16 | 610211.04   |
| Influenza A                                                | 68027      | 58369.08   | 7018        |
| Xylene degradation                                         | 52792.47   | 33930.61   | 50928.23    |
| Systemic lupus erythematosus                               | 82         | 86.27      | 35          |
| Prostate cancer                                            | 54215.65   | 49339.94   | 5941.23     |
| Starch and sucrose metabolism                              | 696453.45  | 342288.09  | 1269528.16  |
| Glycosyltransferases                                       | 447760.01  | 315536.28  | 322178.60   |
| Drug metabolism - cytochrome P450                          | 543858.92  | 468529.22  | 102834.61   |
| Bacterial invasion of epithelial cells                     | 5035.64    | 15         | 185         |
| Sulfur metabolism                                          | 689047.80  | 527553.53  | 440454.35   |
| Olfactory transduction                                     |            | 0          | 4           |
| One carbon pool by folate                                  | 821533.08  | 614262.40  | 499035.22   |
| Other ion-coupled transporters                             | 2816847.28 | 2262411.58 | 1175464.28  |
| Bisphenol degradation                                      | 155700.04  | 135935.29  | 16489.83    |
| Glycosphingolipid biosynthesis - lacto and neolacto series |            | 0          | 0           |
| Glycerolipid metabolism                                    | 593975.07  | 414228.83  | 521408.86   |
| Tropane, piperidine and pyridine alkaloid biosynthesis     | 236941.86  | 207472.44  | 24434.91    |
| Lipid metabolism                                           | 253051.11  | 204029.45  | 165893.44   |
| Histidine metabolism                                       | 882112.67  | 731399.78  | 180526.82   |
| Benzoate degradation                                       | 1127401.04 | 938489.10  | 300254.98   |
| G protein-coupled receptors                                |            | 0          | 0           |
| Renin-angiotensin system                                   | 34041.50   | 29626      | 3716        |

|                                                       |            |            |            |
|-------------------------------------------------------|------------|------------|------------|
| Tryptophan metabolism                                 | 928556.68  | 783704.60  | 230011.23  |
| Gastric acid secretion                                | 0          | 0          | 4          |
| Secondary bile acid biosynthesis                      | 25767.17   | 5329       | 95132      |
| D-Arginine and D-ornithine metabolism                 | 8385.06    | 7350.27    | 988.50     |
| Nitrotoluene degradation                              | 84311.24   | 78565.69   | 9484.56    |
| Other glycan degradation                              | 44746      | 22604.96   | 97221.96   |
| Steroid hormone biosynthesis                          | 27067.65   | 19754.67   | 2010.33    |
| Peptidases                                            | 2988124.51 | 2220431.36 | 1964650.84 |
| Transcription factors                                 | 3064351.69 | 2146842.74 | 2807595.37 |
| Salivary secretion                                    | 0          | 0          | 0          |
| Electron transfer carriers                            | 2587.61    | 1439.35    | 448.79     |
| Stilbenoid, diarylheptanoid and gingerol biosynthesis | 1451       | 1556.81    | 189        |
| Viral myocarditis                                     | 68027      | 58369.08   | 7018       |
| mRNA surveillance pathway                             | 0          | 0          | 0          |
| Other transporters                                    | 552265.19  | 442375.82  | 241737.88  |
| Biotin metabolism                                     | 294920.40  | 244227.23  | 76575.38   |
| Prenyltransferases                                    | 399608.47  | 279029     | 364117.38  |
| D-Glutamine and D-glutamate metabolism                | 284145.80  | 214591.71  | 167147.75  |
| Leishmaniasis                                         | 10         | 0          | 0          |
| Proteasome                                            | 55756.65   | 49498.94   | 5945.23    |
| Melanogenesis                                         | 99.50      | 24         | 18.50      |
| Photosynthesis - antenna proteins                     | 0          | 0          | 0          |
| Toluene degradation                                   | 375956.92  | 317937.86  | 85378.90   |
| Chaperones and folding catalysts                      | 2322445.69 | 1828637.85 | 1164818.98 |
| Protein processing in endoplasmic reticulum           | 82585.09   | 65004.94   | 55029.73   |
| Valine, leucine and isoleucine biosynthesis           | 1184426.65 | 898104.06  | 626449.02  |
| Phenylpropanoid biosynthesis                          | 112285.62  | 78346.61   | 103343.46  |
| Folate biosynthesis                                   | 750696.17  | 620598.86  | 169396.68  |
| Glycosphingolipid biosynthesis - ganglio series       | 20271.50   | 8449.67    | 48234.73   |
| Cell motility and secretion                           | 692883.83  | 584572.33  | 212492.90  |
| Pathways in cancer                                    | 176356.11  | 154517.23  | 18593.46   |
| Transcription related proteins                        | 6202.67    | 3610.01    | 510.19     |
| Phosphatidylinositol signaling system                 | 208702.49  | 163167.37  | 114017.92  |
| p53 signaling pathway                                 | 68027      | 58369.08   | 7018       |

|                                             |            |            |            |
|---------------------------------------------|------------|------------|------------|
| GnRH signaling pathway                      | 10         | 0          | 4          |
| C5-Branched dibasic acid metabolism         | 455429.42  | 357818.92  | 183992.49  |
| Lysine biosynthesis                         | 1004323.77 | 726108.04  | 748404.41  |
| Pertussis                                   | 135797     | 122432.18  | 15695.83   |
| Butirosin and neomycin biosynthesis         | 44141.34   | 31548.61   | 50775.23   |
| Type II diabetes mellitus                   | 46669.21   | 30459.55   | 50649.46   |
| Ascorbate and aldarate metabolism           | 281704.61  | 195891.36  | 304086.65  |
| Apoptosis                                   | 109082.25  | 95913.02   | 11380.33   |
| Oocyte meiosis                              | 0          | 0          | 4          |
| Neuroactive ligand-receptor interaction     | 0          | 0          | 0          |
| Butanoate metabolism                        | 1647818.75 | 1326984.56 | 626552.19  |
| Styrene degradation                         | 177845.92  | 153689.50  | 64967.56   |
| Alzheimer's disease                         | 266378.80  | 210799.90  | 119369.06  |
| Carbon fixation in photosynthetic organisms | 803153.04  | 579170.86  | 636502.09  |
| Vibrio cholerae pathogenic cycle            | 201736.88  | 154733.96  | 114102.38  |
| Glyoxylate and dicarboxylate metabolism     | 1494879.07 | 1266345.39 | 428087.96  |
| Secretion system                            | 4250410.53 | 3491117.61 | 1412456.27 |
| Insulin signaling pathway                   | 119572.69  | 85490.22   | 104935.69  |
| Methane metabolism                          | 1587303.76 | 1187776.27 | 1225688.59 |
| Aminobenzoate degradation                   | 509515.35  | 421662.10  | 189802.01  |
| Retinol metabolism                          | 134702     | 104848.90  | 60322.46   |
| Zeatin biosynthesis                         | 67425.26   | 47907.61   | 53038.23   |
| Pores ion channels                          | 1196978.11 | 1012219.15 | 264905.57  |
| Isoflavonoid biosynthesis                   | 1722       | 1961       | 237        |
| Fc gamma R-mediated phagocytosis            | 10         | 0          | 0          |
| ABC transporters                            | 5298480.90 | 4004222.74 | 3946492.67 |
| Fluorobenzoate degradation                  | 216199.80  | 188388.75  | 23664.23   |
| RIG-I-like receptor signaling pathway       | 1001.50    | 1483.94    | 105        |
| Renal cell carcinoma                        | 54103.46   | 46808.21   | 5630.23    |
| Lysine degradation                          | 684996.96  | 580677.83  | 113510.04  |
| Germination                                 | 5272.52    | 7718       | 782.50     |
| Ribosome                                    | 3685604.40 | 2601931.27 | 3007649.55 |
| Pancreatic secretion                        | 0          | 0          | 0          |
| Amino acid metabolism                       | 167060.77  | 126531.71  | 109412.84  |

|                                                     |            |            |            |
|-----------------------------------------------------|------------|------------|------------|
| Protein export                                      | 1056921.65 | 775394.42  | 707901.64  |
| Hypertrophic cardiomyopathy (HCM)                   | 10303      | 8598       | 963        |
| DNA replication proteins                            | 1778399.77 | 1260569.25 | 1427441.74 |
| Betalain biosynthesis                               | 109.50     | 80.27      | 45.50      |
| Notch signaling pathway                             | 0          | 0          | 4          |
| Photosynthesis proteins                             | 599410.03  | 438328.71  | 430501.07  |
| Aldosterone-regulated sodium reabsorption           | 0          | 0          | 0          |
| Primary bile acid biosynthesis                      | 32958.67   | 10816.27   | 95689      |
| Colorectal cancer                                   | 68027      | 58369.08   | 7018       |
| Cellular antigens                                   | 125415.76  | 114624.69  | 12395.96   |
| Bile secretion                                      | 2.50       | 8.27       | 0          |
| Protein digestion and absorption                    | 7185.50    | 7485       | 874        |
| Chloroalkane and chloroalkene degradation           | 383898.27  | 304829.02  | 178146.69  |
| Protein folding and associated processing           | 1714437.53 | 1366273.52 | 731582.46  |
| Energy metabolism                                   | 1483108.38 | 1158225.68 | 847249.54  |
| Oxidative phosphorylation                           | 2519304.79 | 2023795.73 | 1185790.03 |
| African trypanosomiasis                             | 40712.90   | 34523.94   | 4239.73    |
| Amino sugar and nucleotide sugar metabolism         | 1593624.89 | 878096.79  | 2517385.23 |
| Nitrogen metabolism                                 | 1463542.62 | 1145027.78 | 657080.85  |
| Restriction enzyme                                  | 312685.52  | 236670.03  | 171809.50  |
| Limonene and pinene degradation                     | 285977.08  | 246091.92  | 28297.69   |
| General function prediction only                    | 7304557.89 | 5533195.18 | 4632688.25 |
| Purine metabolism                                   | 3784886.66 | 2766013.24 | 2787657.95 |
| Amoebiasis                                          | 21076.39   | 20448.27   | 2033       |
| Bladder cancer                                      | 4537.40    | 5549.94    | 535.23     |
| Biosynthesis of type II polyketide products         | 69         | 0          | 12         |
| Staphylococcus aureus infection                     | 89501.15   | 5764.35    | 284294     |
| Pentose and glucuronate interconversions            | 467234.45  | 276195.54  | 693107.15  |
| Spliceosome                                         | 0          | 0          | 7          |
| Ethylbenzene degradation                            | 168456.75  | 142932.03  | 18139.19   |
| Ubiquinone and other terpenoid-quinone biosynthesis | 543777.66  | 400556.03  | 427830.24  |
| Basal transcription factors                         | 156.50     | 128        | 14         |
| Endocytosis                                         | 10         | 0          | 0          |
| Sphingolipid metabolism                             | 38434.52   | 14486.22   | 96052.06   |

|                                               |            |            |            |
|-----------------------------------------------|------------|------------|------------|
| Glutathione metabolism                        | 1108355.14 | 908820.79  | 437268.10  |
| Hematopoietic cell lineage                    | 44         | 30         | 0          |
| Chagas disease (American trypanosomiasis)     | 27290.90   | 22099.94   | 2431.23    |
| Cytochrome P450                               | 44         | 30         | 0          |
| Linoleic acid metabolism                      | 119355.14  | 105954.21  | 13514.23   |
| Base excision repair                          | 757991.33  | 541733.06  | 630902.99  |
| Homologous recombination                      | 1475582.93 | 1069503.70 | 1074866.31 |
| Plant-pathogen interaction                    | 321151.36  | 260198.86  | 172211.34  |
| Glycine, serine and threonine metabolism      | 1522842.25 | 1190450.79 | 755445.92  |
| Fatty acid biosynthesis                       | 991332.95  | 739320.06  | 700999.47  |
| Inositol phosphate metabolism                 | 218570.79  | 168931.14  | 114388.73  |
| Chromosome                                    | 2994188.63 | 2269118.89 | 1880082.70 |
| Various types of N-glycan biosynthesis        | 0          | 0          | 0          |
| Lipoic acid metabolism                        | 131605.87  | 94346.22   | 105931.19  |
| N-Glycan biosynthesis                         | 6482.14    | 6001.94    | 879        |
| Amino acid related enzymes                    | 2398526.54 | 1789870.32 | 1539711.87 |
| Phosphonate and phosphinate metabolism        | 125705.18  | 90827.43   | 105407.02  |
| Nicotinate and nicotinamide metabolism        | 801012.22  | 632806.67  | 407688.64  |
| Pyruvate metabolism                           | 2158367.72 | 1596343.26 | 1510478.21 |
| Tuberculosis                                  | 299247.70  | 218254.58  | 215602.42  |
| Non-homologous end-joining                    | 26120      | 22695.54   | 2642.50    |
| Peroxisome                                    | 572865.48  | 485526.75  | 151216.94  |
| Pyrimidine metabolism                         | 2680072.42 | 1878447.68 | 2257131.79 |
| Flagellar assembly                            | 1199864.31 | 1080933.43 | 118235.28  |
| Glycosphingolipid biosynthesis - globo series | 42842.92   | 10989.67   | 142996.73  |
| Metabolism of xenobiotics by cytochrome P450  | 537020.70  | 462904.22  | 102301.61  |
| Huntington's disease                          | 319165.25  | 269849.84  | 78899.29   |
| Ion channels                                  | 26506.44   | 12323.35   | 48704.96   |
| Glycerophospholipid metabolism                | 987129.75  | 757698.57  | 609071.29  |
| Lipopolysaccharide biosynthesis proteins      | 934371.70  | 792367.91  | 192774.77  |
| PPAR signaling pathway                        | 448262.42  | 377854.11  | 92050.59   |
| Sesquiterpenoid biosynthesis                  | 0          | 0          | 0          |
| Tyrosine metabolism                           | 736087.12  | 625090.03  | 169787.17  |
| Glutamatergic synapse                         | 85528      | 64888.36   | 54864.96   |

|                                                     |            |            |            |
|-----------------------------------------------------|------------|------------|------------|
| Vascular smooth muscle contraction                  | 0          | 0          | 0          |
| alpha-Linolenic acid metabolism                     | 111364.81  | 95471.01   | 11346.69   |
| Penicillin and cephalosporin biosynthesis           | 51891.90   | 45245.01   | 5392.23    |
| Mineral absorption                                  | 69534.19   | 53365.54   | 53362.50   |
| Chlorocyclohexane and chlorobenzene degradation     | 153279.77  | 126401.56  | 62255.23   |
| Sulfur relay system                                 | 607751.77  | 479921.04  | 247882.41  |
| Polyketide sugar unit biosynthesis                  | 171355.75  | 111176.76  | 201331.12  |
| beta-Alanine metabolism                             | 600186.17  | 515637.56  | 59371.07   |
| Cysteine and methionine metabolism                  | 1487352.68 | 1092209.27 | 1074932.44 |
| Ubiquitin system                                    | 34333.32   | 27590.94   | 3728.73    |
| Pentose phosphate pathway                           | 1030835.81 | 678873.08  | 1213880.75 |
| Thiamine metabolism                                 | 566486.94  | 429669.78  | 334864.99  |
| Riboflavin metabolism                               | 400092.65  | 316108.80  | 227157.50  |
| Bacterial toxins                                    | 182714.72  | 112399.90  | 201589.73  |
| Proximal tubule bicarbonate reclamation             | 88077.77   | 76860.61   | 9031.56    |
| Atrazine degradation                                | 107660.17  | 95164.75   | 11213.23   |
| Biosynthesis of vancomycin group antibiotics        | 44768.20   | 28453.94   | 50445.23   |
| Prion diseases                                      | 58024.62   | 51770.94   | 6110.73    |
| Arginine and proline metabolism                     | 1803630.05 | 1387809.39 | 1108627.83 |
| Cardiac muscle contraction                          | 92341.50   | 80955.54   | 8786       |
| Signal transduction mechanisms                      | 842229.15  | 647453.67  | 502349.99  |
| Caprolactam degradation                             | 201011.64  | 172739.19  | 19659.02   |
| Alanine, aspartate and glutamate metabolism         | 1489717.49 | 1118615.97 | 937686.10  |
| Phenylalanine, tyrosine and tryptophan biosynthesis | 1330483.22 | 1043512.38 | 550902.08  |
| Glycosaminoglycan degradation                       | 20408.40   | 8454.67    | 48263.73   |
| Caffeine metabolism                                 | 899        | 1460.27    | 109        |
| Others                                              | 1347648.28 | 977447.12  | 967494.64  |
| Two-component system                                | 4770440.43 | 3922271.79 | 1922004.82 |
| Parkinson's disease                                 | 160368.50  | 139324.62  | 15820      |
| Taurine and hypotaurine metabolism                  | 245865.75  | 177471.85  | 162487.15  |
| Ribosome biogenesis in eukaryotes                   | 121562.91  | 95179.28   | 58848.36   |
| Carotenoid biosynthesis                             | 50552.35   | 43043.16   | 4252       |
| Ribosome Biogenesis                                 | 2776632.22 | 2035261.17 | 1994893.88 |
| Nucleotide metabolism                               | 114230.52  | 76634.70   | 103131.21  |

|                                                            |            |            |            |
|------------------------------------------------------------|------------|------------|------------|
| Aminoacyl-tRNA biosynthesis                                | 1770968.69 | 1266795.77 | 1381067.44 |
| RNA polymerase                                             | 281922.48  | 191861.11  | 259418.92  |
| Biosynthesis of siderophore group nonribosomal peptides    | 57262.04   | 41667.02   | 52108.88   |
| RNA transport                                              | 103383.58  | 69233.68   | 103133.96  |
| Toxoplasmosis                                              | 68027      | 58369.08   | 7018       |
| Ether lipid metabolism                                     | 13168.17   | 11111      | 1282       |
| Epithelial cell signaling in Helicobacter pylori infection | 126236.41  | 99394.55   | 59094.46   |
| DNA replication                                            | 1043887.53 | 738567.25  | 844376.90  |
| Cytoskeleton proteins                                      | 459004.09  | 366814.55  | 186739.75  |
| Lipid biosynthesis proteins                                | 1515121.16 | 1203000.80 | 707687.31  |
| Biosynthesis of type II polyketide backbone                | 10         | 0          | 0          |
| Membrane and intracellular structural molecules            | 1739109.89 | 1489408.80 | 368465.95  |
| Carbohydrate digestion and absorption                      | 2296.07    | 287.01     | 132.56     |
| Meiosis - yeast                                            | 33497.50   | 31401.35   | 3316       |
| Cyanoamino acid metabolism                                 | 352061.38  | 260728.61  | 265383.44  |
| Chronic myeloid leukemia                                   | 0          | 0          | 4          |
| Glioma                                                     | 0          | 0          | 4          |
| beta-Lactam resistance                                     | 37751.25   | 29528.34   | 3772.23    |
| Synthesis and degradation of ketone bodies                 | 471838.48  | 393720.33  | 138680.66  |
| Adipocytokine signaling pathway                            | 148208.23  | 128843.88  | 14819.46   |
| Neurotrophin signaling pathway                             | 0          | 0          | 4          |
| Novobiocin biosynthesis                                    | 209794.38  | 172404.10  | 67696.25   |
| Wnt signaling pathway                                      | 0          | 0          | 8          |
| Biosynthesis and biodegradation of secondary metabolites   | 170770.71  | 135863.65  | 62595.44   |
| Selenocompound metabolism                                  | 632464.64  | 454209.65  | 525290.18  |
| Cell division                                              | 205597.51  | 170785.49  | 67192.42   |
| Isoquinoline alkaloid biosynthesis                         | 88933.81   | 78819.15   | 9509.46    |
| Progesterone-mediated oocyte maturation                    | 54215.65   | 49339.94   | 5941.23    |
| Arachidonic acid metabolism                                | 161271.97  | 134615.57  | 62541.19   |
| Bacterial chemotaxis                                       | 1031930.17 | 945812.51  | 104546.63  |
| Nucleotide excision repair                                 | 588732.37  | 406039.29  | 567958.84  |
| Geraniol degradation                                       | 672654.85  | 587065.59  | 69742.15   |
| Lipopolysaccharide biosynthesis                            | 693356.23  | 612743.71  | 75566.66   |
| Mismatch repair                                            | 1211280.06 | 849488.41  | 1047264.72 |



|                                                           |            |            |            |
|-----------------------------------------------------------|------------|------------|------------|
| Sporulation                                               | 62047.65   | 51386.94   | 52908.50   |
| Flavonoid biosynthesis                                    | 22951.50   | 20509.27   | 2684.50    |
| Small cell lung cancer                                    | 68037      | 58369.08   | 7018       |
| Endocrine and other factor-regulated calcium reabsorption | 0          | 0          | 0          |
| Translation proteins                                      | 1673611.09 | 1261870.17 | 1049507.49 |
| Flavone and flavonol biosynthesis                         | 110.90     | 5          | 17         |
| Peptidoglycan biosynthesis                                | 1297079.38 | 905682.35  | 1053919.52 |
| Inorganic ion transport and metabolism                    | 742449.61  | 619327.88  | 262029.99  |
| RNA degradation                                           | 872275.71  | 643380.46  | 597205.45  |
| Galactose metabolism                                      | 470238.20  | 212570.89  | 971154.65  |
| Indole alkaloid biosynthesis                              | 0          | 56.27      | 31         |
| Amyotrophic lateral sclerosis (ALS)                       | 193229.94  | 172624.50  | 20276.96   |
| Glycan biosynthesis and metabolism                        | 163008.72  | 144612.23  | 17057.01   |
| Cell cycle - Caulobacter                                  | 904696.01  | 670299.65  | 598828.36  |
| Antigen processing and presentation                       | 54215.65   | 49339.94   | 5941.23    |
| Carbon fixation pathways in prokaryotes                   | 2015902.16 | 1621322.10 | 759173.06  |
| Protein kinases                                           | 1010858.30 | 808175.47  | 475286.94  |
| Metabolism of cofactors and vitamins                      | 347852.28  | 283791.14  | 127694.46  |
| Function unknown                                          | 3708254.93 | 2953618.59 | 1727731.38 |
| Dioxin degradation                                        | 80683.06   | 46938.49   | 99599.96   |
| D-Alanine metabolism                                      | 200352.32  | 130981.84  | 205209.42  |
| Translation factors                                       | 847537.26  | 613618.60  | 640840.18  |
| Steroid biosynthesis                                      | 1297.50    | 1604.27    | 175.50     |
| Type I diabetes mellitus                                  | 68428.56   | 48159.61   | 53217.73   |
| Polycyclic aromatic hydrocarbon degradation               | 19919      | 19292.50   | 1968.16    |
| Bacterial motility proteins                               | 3580336.87 | 3210514.23 | 414879.62  |
| Vibrio cholerae infection                                 | 9888       | 8240       | 818        |
| Fatty acid metabolism                                     | 1260006.87 | 1054759.90 | 264398.32  |
| Terpenoid backbone biosynthesis                           | 973717.67  | 707639.28  | 745075.96  |
| Long-term potentiation                                    | 0          | 0          | 4          |
| Fatty acid elongation in mitochondria                     | 0          | 0          | 0          |
| Porphyrin and chlorophyll metabolism                      | 1290023.27 | 1113049.51 | 176753.64  |
| Phototransduction - fly                                   | 0          | 0          | 4          |
| Cholinergic synapse                                       | 0          | 0          | 4          |

|                                                     |            |            |            |
|-----------------------------------------------------|------------|------------|------------|
| Vitamin B6 metabolism                               | 382213.06  | 288933.54  | 224537.40  |
| Photosynthesis                                      | 545918.41  | 388118.15  | 424918.34  |
| Fructose and mannose metabolism                     | 893754.40  | 380243.33  | 1984881.58 |
| Shigellosis                                         | 276        | 0          | 48         |
| Streptomycin biosynthesis                           | 310366.86  | 204698.68  | 354167.60  |
| Glycolysis / Gluconeogenesis                        | 1674780.08 | 1088619.10 | 1877611.70 |
| Replication, recombination and repair proteins      | 1446650.01 | 1032186    | 1213393.22 |
| Phenylalanine metabolism                            | 652750.60  | 555452.44  | 158437.56  |
| Bacterial secretion system                          | 1766276.73 | 1438264.14 | 598245.90  |
| Carbohydrate metabolism                             | 81192.41   | 41208.93   | 147081.67  |
| Phosphotransferase system (PTS)                     | 855173.14  | 136233.20  | 3088578.49 |
| Lysosome                                            | 33304.40   | 22169.28   | 49848.23   |
| VEGF signaling pathway                              | 10         | 0          | 0          |
| Valine, leucine and isoleucine degradation          | 1631881.88 | 1359815.16 | 390692.57  |
| Tetracycline biosynthesis                           | 267590.64  | 191056.71  | 212052.42  |
| Naphthalene degradation                             | 511667.01  | 428553.15  | 145863.19  |
| Biosynthesis of 12-, 14- and 16-membered macrolides | 0          | 0          | 0          |
| ErbB signaling pathway                              | 0          | 0          | 4          |
| Propanoate metabolism                               | 1565694.27 | 1252305.98 | 617314.11  |
| Calcium signaling pathway                           | 0          | 0          | 8          |
| MAPK signaling pathway - yeast                      | 113367.94  | 71723.82   | 150128.96  |

| A12        | A13        | A14        | A15        | A16        | A17        | A18        | A19        | A2         |   |
|------------|------------|------------|------------|------------|------------|------------|------------|------------|---|
| 0          | 0          | 0          | 0          | 0          | 0          | 0          | 0          | 0          | 0 |
| 1021888.83 | 1197132.38 | 721326.62  | 663988.63  | 745050.13  | 1281616.39 | 791644.65  | 796923.54  | 609024.90  |   |
| 3515784.72 | 4129910.58 | 2542543.73 | 2447932.58 | 2848244.98 | 4431985.48 | 2755761.29 | 2781986.53 | 2447593.32 |   |
| 693358.78  | 824962.50  | 503659.12  | 470652.66  | 535138.41  | 875239.94  | 545254.09  | 553404.17  | 485029.52  |   |
| 75860.64   | 87188.38   | 53128.71   | 55530.17   | 65824.37   | 95498.58   | 58853.89   | 60625.80   | 52116.24   |   |
| 45606.25   | 55708.56   | 32232.67   | 29923.82   | 29017.02   | 60460.41   | 38547.75   | 39151.74   | 27910.32   |   |
| 203807.98  | 245213.82  | 148954.45  | 158083.96  | 187803.66  | 264053.30  | 159357.88  | 162762.30  | 200684.32  |   |
| 0          | 0          | 0          | 0          | 3          | 0          | 0          | 0          | 0          | 0 |
| 6127124.02 | 6902570.68 | 4335454.93 | 4514048.31 | 5768054.13 | 7127328.57 | 4420866.22 | 4433968.67 | 7337656.72 |   |
| 53485.82   | 68148.53   | 40435.71   | 40999.70   | 44252.37   | 70548.91   | 42889.71   | 43462.56   | 80133.68   |   |
| 379502.25  | 460133.97  | 265294.19  | 242388.16  | 254300.06  | 498922.08  | 308609.07  | 316833.05  | 245189.98  |   |
| 1109805.41 | 1312759.44 | 795218.94  | 708056.29  | 776124.55  | 1401984.37 | 875142.84  | 884207.53  | 600482.66  |   |
| 58450.66   | 73311.68   | 44343.66   | 31623.84   | 32286.66   | 68762.48   | 44586.34   | 42304.56   | 12383.32   |   |
| 35730.42   | 36943.37   | 23911.11   | 21360.08   | 26514.44   | 42114.24   | 21850.83   | 22075.82   | 24497.36   |   |
| 40         | 216        | 62         | 36         | 39         | 209        | 75         | 56.18      | 10         |   |
| 45606.25   | 55532.39   | 32060.67   | 29358.15   | 28989.02   | 60456.74   | 38547.75   | 39148.07   | 27905.32   |   |
| 333947.38  | 407199.84  | 251360.21  | 328368.61  | 460988.26  | 453714.05  | 243830.75  | 250213.39  | 616363.64  |   |
| 302689.90  | 369092.11  | 226011.01  | 219613.43  | 247534.66  | 393964.49  | 237984.19  | 241999.30  | 424295.44  |   |
| 445728.16  | 524573.81  | 304711.37  | 271520.62  | 280409.98  | 572185.38  | 355860.52  | 366296.66  | 226549.28  |   |
| 105.12     | 196.19     | 1227.11    | 836.79     | 126.85     | 416        | 55         | 200        | 16831.30   |   |
| 507815.56  | 602799.02  | 356811.79  | 343309.83  | 391375.06  | 641750.88  | 397919.27  | 407541.43  | 424337.58  |   |
| 0          | 0          | 0          | 0          | 3          | 0          | 0          | 0          | 0          | 0 |
| 594486.46  | 702660.49  | 430887.98  | 399310.62  | 448653.79  | 755084.09  | 468372.64  | 472248.39  | 360633.94  |   |
| 2113360.21 | 2580488.30 | 1520078.06 | 1458815.54 | 1573554.75 | 2797176.82 | 1773679.76 | 1814994.73 | 1558001.52 |   |
| 129180.04  | 151011.01  | 89049.56   | 78416.89   | 79196.91   | 166959.36  | 105270.23  | 107525.51  | 31843.86   |   |
| 0          | 0          | 0          | 0          | 0          | 0          | 0          | 0          | 0          | 0 |
| 404453.71  | 472575.39  | 285063.35  | 285876.57  | 345943.25  | 505440.89  | 311508.44  | 314490.87  | 313507.32  |   |
| 200892.74  | 233126.83  | 138260.29  | 118847.04  | 119704.49  | 251676.99  | 155665.26  | 157804.56  | 130800.60  |   |
| 188874.72  | 227364.86  | 132270.05  | 133027.45  | 149692.19  | 249980.36  | 152026.91  | 157745.32  | 279528.68  |   |
| 712220.80  | 823454.15  | 492401.57  | 414139.67  | 441993.38  | 886042.03  | 547072.66  | 553226.46  | 435602.80  |   |
| 907639.81  | 1056303.23 | 616099.20  | 550100.10  | 579222.44  | 1135697.36 | 715618.61  | 728017.08  | 335321.38  |   |
| 0          | 13.50      | 0          | 0          | 0          | 0          | 0          | 0          | 0          | 0 |
| 26640      | 33390      | 18466.50   | 17572      | 17692      | 38093.67   | 23607      | 24546      | 7201.50    |   |

|            |            |            |            |            |            |            |            |            |
|------------|------------|------------|------------|------------|------------|------------|------------|------------|
| 783133.13  | 870769.89  | 522740.51  | 432059.69  | 466496.04  | 925783.58  | 568199.62  | 576769.04  | 360971.30  |
| 0          | 0          | 0          | 0          | 3          | 0          | 0          | 0          | 0          |
| 4532       | 5733       | 3131.17    | 12189.93   | 23777.50   | 7567.87    | 4236       | 4383.50    | 1272.22    |
| 7240.31    | 9752.67    | 5661.67    | 4316.43    | 5110       | 8849.53    | 5724.89    | 5402.18    | 1480.66    |
| 72611.75   | 91345.09   | 51007.60   | 44602.62   | 44490.91   | 93966.07   | 59197.31   | 58303.38   | 66617.28   |
| 20829.29   | 28926.14   | 16243.30   | 26178.90   | 33319.46   | 34101.30   | 16294.66   | 17017.39   | 38857.96   |
| 24083      | 22563.17   | 15342.33   | 8214.17    | 8979.92    | 23483.53   | 12158.83   | 11840.92   | 4798.36    |
| 2168602.06 | 2523658.96 | 1545774.57 | 1426972.25 | 1635543.64 | 2713261.41 | 1658920.47 | 1666791    | 1694750.78 |
| 2090398.05 | 2440285.18 | 1482875.54 | 1486310.60 | 1790187.72 | 2612176.61 | 1613718.16 | 1622255.53 | 2231176.70 |
| 0          | 0          | 0          | 0          | 3          | 0          | 0          | 0          | 0          |
| 1481.62    | 3215.37    | 1710.37    | 4330.31    | 1525.05    | 3050.53    | 869.02     | 857.95     | 50947.76   |
| 1162.20    | 2020       | 1852       | 1164       | 1017       | 3194.60    | 776        | 1334.54    | 453        |
| 58450.66   | 73311.68   | 44343.66   | 31620.34   | 32286.66   | 68762.48   | 44586.34   | 42304.56   | 12383.32   |
| 0          | 0          | 0          | 0          | 0          | 0          | 0          | 0          | 0          |
| 425947.89  | 501698.61  | 298589.40  | 268326.16  | 292107.51  | 541901.89  | 333345.59  | 337185.35  | 302363.56  |
| 235228.72  | 278189.14  | 166020.81  | 144952.98  | 151596.04  | 298836.62  | 186601.78  | 187805.45  | 173375.10  |
| 271234.53  | 323516.75  | 197901.22  | 195539.92  | 233360.22  | 341523.03  | 211226.67  | 213057.16  | 148659.80  |
| 207965.19  | 243686.02  | 148087.56  | 139498.24  | 155602.65  | 259135.68  | 162615.81  | 165872.81  | 134395.38  |
| 0          | 0          | 7          | 0          | 0          | 134        | 0          | 0          | 0          |
| 45895.25   | 55887.39   | 35668.67   | 29387.65   | 29063.02   | 61640.74   | 38562.75   | 39268.07   | 27998.32   |
| 31.83      | 61.50      | 12.83      | 50.67      | 11.33      | 51.33      | 19.17      | 64.17      | 7.16       |
| 0          | 24         | 492        | 0          | 0          | 0          | 0          | 108        | 0          |
| 306407.14  | 359000.55  | 215074.29  | 186488.69  | 194602.48  | 385866.63  | 242575.58  | 246410.28  | 190926.56  |
| 1759302.82 | 2074589.27 | 1254056.24 | 1154828.91 | 1265079.86 | 2226416.94 | 1404411.37 | 1413573.08 | 1137870.30 |
| 61663.89   | 73510.90   | 42903.50   | 40801.82   | 46695.85   | 81129.54   | 49332.56   | 49260.24   | 30960.66   |
| 875033.64  | 1024282.98 | 633660.49  | 557981.96  | 631474.53  | 1088599.94 | 673512.74  | 681174.66  | 574918.68  |
| 80089.26   | 89660.63   | 51949.79   | 49038.99   | 61758.12   | 99587.08   | 54966.06   | 56133.88   | 51830.78   |
| 592311.75  | 708564.77  | 431151.03  | 371365.58  | 387707.99  | 760804.05  | 474604.75  | 480881.38  | 394125.34  |
| 8376.25    | 10333.05   | 5766.84    | 9709.15    | 14550.27   | 10984.14   | 5890.83    | 6038.64    | 18713.74   |
| 556843.39  | 658168.38  | 390459.03  | 346815.75  | 367848.32  | 708514.19  | 451030.85  | 453753.87  | 299177.66  |
| 149127.30  | 182121.46  | 108828.50  | 87523.14   | 88890.28   | 186670.23  | 118942.15  | 117696.80  | 67854.92   |
| 4662.92    | 4938.73    | 3208.06    | 2798.32    | 2015.91    | 4884.59    | 2014.83    | 2030.25    | 51298.72   |
| 155338.40  | 187015.95  | 110625.65  | 104425.96  | 115699.76  | 199189.08  | 124676.28  | 126221.05  | 104239.98  |
| 58450.66   | 73311.68   | 44343.66   | 31620.34   | 32286.66   | 68762.48   | 44586.34   | 42304.56   | 12383.32   |

|            |            |            |            |            |            |            |            |            |
|------------|------------|------------|------------|------------|------------|------------|------------|------------|
| 0          | 0          | 7          | 0          | 3          | 134        | 0          | 0          | 0          |
| 351990.33  | 409273.30  | 254689.68  | 214206.59  | 237743.12  | 430600.81  | 266919.44  | 269065.23  | 282579.98  |
| 700932.70  | 831651     | 505728.69  | 486439.33  | 563888.01  | 888817.85  | 550872.78  | 555864.56  | 469273.88  |
| 109823.18  | 138654.12  | 77652.75   | 77051.52   | 74112.92   | 153739.65  | 96867.66   | 100463.35  | 195851.56  |
| 29276.06   | 34383.86   | 19390.44   | 21596.75   | 27729.27   | 38945.68   | 21650.64   | 22518.49   | 23306.74   |
| 31466.24   | 35323.80   | 23140.73   | 21930.90   | 27285.79   | 36025.98   | 21156.53   | 21200.56   | 40248.98   |
| 208062.48  | 214102.54  | 133013.26  | 131085.13  | 166046.43  | 220278.33  | 132118.49  | 133484.13  | 243381.34  |
| 93247.02   | 114695.85  | 67869.15   | 54552.35   | 54543.99   | 113754.24  | 73595.51   | 72621.75   | 21224.86   |
| 0          | 0          | 0          | 0          | 3          | 0          | 0          | 0          | 0          |
| 0          | 0          | 0          | 3.50       | 0          | 0          | 0          | 0          | 0          |
| 1305855.12 | 1498154.83 | 907575.84  | 782095.31  | 853706.10  | 1587029.86 | 985107.03  | 994756.40  | 720918.46  |
| 145777.07  | 172536.55  | 97668.95   | 92619.61   | 98599.68   | 182482.74  | 113694.08  | 118643.94  | 35010.94   |
| 210139.92  | 246794.05  | 152505.49  | 124215.25  | 138355     | 251710.65  | 158838.30  | 155137.18  | 63064.30   |
| 560181.23  | 673021.94  | 405048.37  | 403000.82  | 463162.57  | 712100.71  | 438794.15  | 444748.07  | 503934.34  |
| 148248.55  | 183041.21  | 113274.61  | 96496.49   | 109047.94  | 193077.96  | 121971.85  | 116099.37  | 133240.12  |
| 1258488.27 | 1422512.35 | 856177.06  | 722274.09  | 772217.51  | 1487753.53 | 930207.94  | 938645.26  | 635857.80  |
| 3342011.27 | 3948176.71 | 2362651.12 | 2071447.83 | 2211980.12 | 4258505.52 | 2654665.44 | 2666881.65 | 2358323.42 |
| 81456.84   | 98104.27   | 59167.88   | 60261.65   | 70240.73   | 104267.84  | 66277.11   | 66961.53   | 86550.54   |
| 1140302.65 | 1355528.40 | 802369.08  | 796240.61  | 924128.22  | 1435955.60 | 890598.01  | 910269.16  | 710026.86  |
| 417617.81  | 464793.49  | 281275     | 243531.80  | 265862.11  | 502272.95  | 307540.36  | 313529.16  | 161747.82  |
| 99557.82   | 118557.92  | 70848.95   | 66150.56   | 72192.79   | 132233.65  | 82178.78   | 83775.46   | 58326.04   |
| 46118.06   | 54950.86   | 33783.94   | 33492.75   | 38499.27   | 58976.35   | 36708.64   | 37097.49   | 27981.04   |
| 961104.74  | 1160235.26 | 679241.01  | 611196.72  | 624985.81  | 1243978.15 | 783924.10  | 798042.80  | 689019.68  |
| 2126       | 1690       | 1189       | 677        | 997        | 2231.34    | 1133       | 1056       | 244        |
| 0          | 0          | 7          | 0          | 0          | 134        | 0          | 0          | 0          |
| 4081828.12 | 4497691.39 | 2810960.64 | 2575013.99 | 3030373.37 | 4595140.32 | 2890443.89 | 2901710.65 | 4761568.36 |
| 170597.06  | 214357.08  | 118144.48  | 115825.84  | 114225.58  | 235035.26  | 151384.19  | 157721.55  | 79806.08   |
| 1199.12    | 2168.12    | 880.12     | 1695.88    | 1085.50    | 1686.15    | 812        | 1267.85    | 17162.50   |
| 45070.39   | 53277.39   | 32417.17   | 26544.65   | 27614.60   | 57317.01   | 35808.06   | 36244.17   | 27566.28   |
| 582374.20  | 650668.51  | 391895.54  | 316848.49  | 335662.72  | 688748.89  | 425422.05  | 429463.32  | 299703.88  |
| 4263.66    | 7123.50    | 2435       | 2052       | 1802       | 8356       | 3270.49    | 3040.50    | 1208       |
| 2502260.32 | 2982309.64 | 1829644.50 | 1809454.03 | 2116720.48 | 3203211.69 | 1994365.94 | 2016936.70 | 1547983.68 |
| 0          | 0          | 0          | 3.50       | 0          | 0          | 0          | 0          | 0          |
| 126070.84  | 143309.40  | 88155.23   | 82651.05   | 92348.03   | 153318.25  | 93684.66   | 93320.51   | 179186.38  |

|            |            |            |            |            |            |            |            |            |
|------------|------------|------------|------------|------------|------------|------------|------------|------------|
| 746133.71  | 887137.53  | 544541.72  | 513120.98  | 589164.20  | 952556.49  | 592191.79  | 598629.10  | 481982.02  |
| 8525       | 9623       | 5679       | 4124       | 4343       | 11244      | 6022       | 6152       | 2019       |
| 1220418.87 | 1449404.19 | 891380.92  | 869447.60  | 1014316.16 | 1548056.50 | 961866.02  | 966813.14  | 861605.96  |
| 31.83      | 131        | 19.83      | 50.67      | 17.33      | 247.33     | 19.17      | 64.35      | 7.16       |
| 0          | 0          | 0          | 0          | 0          | 0          | 0          | 0          | 0          |
| 421893.04  | 504644.44  | 307677.52  | 297875.82  | 340272.43  | 536765.35  | 333017.01  | 340433     | 254641.90  |
| 0          | 0          | 0          | 0          | 0          | 0          | 0          | 0          | 0          |
| 11176      | 11747.50   | 7067.17    | 14182.43   | 26234.50   | 14090.87   | 7429       | 7542.68    | 2513.22    |
| 58450.66   | 73311.68   | 44343.66   | 31620.34   | 32286.66   | 68762.48   | 44586.34   | 42304.56   | 12383.32   |
| 114926.30  | 122537.49  | 73131.25   | 59491.47   | 62168.77   | 134168.71  | 79940.95   | 82022.02   | 74996.16   |
| 0          | 7.50       | 0          | 0          | 0          | 49         | 0          | 0.18       | 12         |
| 6800.50    | 7861.50    | 4429       | 4560.50    | 4222.75    | 9773.50    | 5391       | 5500.75    | 1443.72    |
| 292778.58  | 343893.65  | 201927.16  | 187644.68  | 207254.70  | 372356.14  | 231466.59  | 235517.65  | 170777.46  |
| 1319251.07 | 1569399.24 | 947695.60  | 839781.30  | 910506.47  | 1668056.58 | 1048345.61 | 1049440    | 764274.36  |
| 1123397.51 | 1333846.49 | 803242.66  | 739265.16  | 818295.29  | 1400598.02 | 881298.26  | 878857.31  | 696347.78  |
| 1958395.44 | 2295547.13 | 1375766.93 | 1240796.58 | 1367341.46 | 2454870.43 | 1532048.07 | 1545801.53 | 1081765.44 |
| 32186.08   | 39806.29   | 23156.50   | 20410.53   | 20260.60   | 44107.24   | 26415.17   | 27712.49   | 25328.62   |
| 847298.28  | 1032145.49 | 638009.71  | 762784.32  | 1033695.19 | 1105264.59 | 664967.77  | 665999.81  | 807271.78  |
| 1127213.50 | 1326111.12 | 823035.54  | 696418.76  | 768175.53  | 1381735.35 | 871942.92  | 855698.51  | 556365.40  |
| 218087.74  | 272593.24  | 158359.59  | 163153.73  | 175751.14  | 298311.27  | 193402.37  | 194450.58  | 73792.36   |
| 244493.67  | 274298.87  | 163933.67  | 134511.21  | 139220.64  | 294739.90  | 181182.30  | 184622.85  | 123688.14  |
| 5306222.60 | 6299654.40 | 3768344.13 | 3609433.32 | 4090553.17 | 6771903.62 | 4220230.40 | 4276712.44 | 3590719.38 |
| 2667329.60 | 3164981.96 | 1925067.91 | 1874938.05 | 2154644.39 | 3382156.81 | 2100714.91 | 2131746.31 | 1916346.96 |
| 21045.51   | 20859.67   | 13052.67   | 9866.33    | 11416      | 22415.27   | 13628.89   | 13917.18   | 4123.86    |
| 5095.42    | 5999.56    | 2825.34    | 3125.48    | 3089.94    | 6018.91    | 3224.83    | 3639.15    | 17728.80   |
| 16.12      | 27.88      | 2.12       | 39         | 10         | 7          | 11         | 50         | 0          |
| 4889.53    | 7534.12    | 7878.02    | 35289.25   | 70977.83   | 14372.01   | 4476.95    | 4698.52    | 1716.16    |
| 282290.03  | 314954.49  | 189613.16  | 216932.95  | 294573.43  | 341592.51  | 193769.64  | 195131.44  | 497940.74  |
| 0          | 0          | 0          | 0          | 0          | 0          | 0          | 0          | 0          |
| 130423.22  | 166508.46  | 92406.78   | 88014.44   | 86203.91   | 179793.88  | 114856.61  | 118150.82  | 68523.18   |
| 379054.62  | 465096.02  | 280436.40  | 271609.72  | 318996.86  | 496648.87  | 312230.33  | 311651.94  | 291331.98  |
| 29.20      | 361        | 7          | 56.50      | 19         | 276        | 16         | 75         | 23         |
| 0          | 0          | 7          | 0          | 0          | 134        | 0          | 0          | 0          |
| 15875.15   | 20159.61   | 12301.79   | 18533.09   | 27699.11   | 23657.75   | 8531.55    | 9196.34    | 20725.30   |

|            |            |            |            |            |            |            |            |            |
|------------|------------|------------|------------|------------|------------|------------|------------|------------|
| 878360.35  | 1023064.26 | 607262.88  | 546195.59  | 591178.80  | 1097223.08 | 680853.64  | 694062.93  | 576220.48  |
| 11         | 0          | 7          | 0          | 2          | 134        | 0          | 24         | 3          |
| 22590.25   | 25626.79   | 16042.17   | 11072.86   | 11248.27   | 28424.24   | 14830      | 15480.32   | 22160.96   |
| 11         | 0          | 7          | 0          | 2          | 164        | 0          | 24         | 3          |
| 94226.94   | 119556.44  | 66241.26   | 65241.94   | 64875.45   | 132907.61  | 86563.89   | 88970.25   | 25218.84   |
| 529423.28  | 617789.59  | 382234.83  | 366514.37  | 435695.22  | 661138.75  | 406027.44  | 410272.16  | 375356.78  |
| 1024958.65 | 1227444.41 | 752572.77  | 729927.67  | 836738.27  | 1320680.28 | 825179.30  | 832808.27  | 685687.50  |
| 251549.88  | 291710.77  | 175599.07  | 160677.90  | 179030.73  | 313228.21  | 195407.22  | 196270.90  | 224678.06  |
| 1153644.94 | 1356522.66 | 816911.10  | 749840.68  | 829947.77  | 1447610.64 | 896795.30  | 912415.87  | 760822.72  |
| 720224.99  | 835695.91  | 504923.85  | 480340.73  | 556894.65  | 893955.76  | 549977.15  | 558277.12  | 437207.14  |
| 167576.09  | 194630.40  | 117605.78  | 103713.49  | 115083.34  | 206716.54  | 122745.48  | 124072.99  | 288867.64  |
| 2170914.34 | 2588764.82 | 1556747.59 | 1480655.18 | 1670575.81 | 2778003.41 | 1742319.94 | 1758067.67 | 1561157.68 |
| 0          | 0          | 0          | 0          | 0          | 0          | 6          | 0          | 6          |
| 90762.24   | 107799.97  | 66128.67   | 64075.87   | 76599.66   | 115549.24  | 72034.61   | 72918.53   | 72121.14   |
| 5103.61    | 7370.67    | 4870       | 4010.17    | 3471.50    | 9087.17    | 4593.64    | 4755.85    | 1321.52    |
| 1715243.99 | 2052240.15 | 1238796.80 | 1184826.14 | 1336715.33 | 2199975.81 | 1370741.38 | 1387439.78 | 1237193.08 |
| 87648.39   | 102158.54  | 61737.75   | 61908.78   | 74253.49   | 110261.32  | 68921.64   | 70707.40   | 54314.82   |
| 597724.22  | 722148.92  | 422804.53  | 411141.05  | 447075.23  | 778837.80  | 488036.54  | 499396.02  | 449377.56  |
| 1561392.14 | 1809710.36 | 1100607.73 | 1035598.42 | 1209879.46 | 1927005.57 | 1196078.55 | 1208230.75 | 1053016.82 |
| 211075.58  | 257127.01  | 157533.13  | 144654.63  | 166852.99  | 267780.81  | 167534.15  | 166005.42  | 116129.88  |
| 23070.26   | 26023.34   | 14917.66   | 10675.34   | 11531.66   | 29741.32   | 15629.84   | 15477.70   | 4832.32    |
| 464990.89  | 545765.10  | 324820.86  | 281841.24  | 297016.23  | 582103.34  | 365371.89  | 370311.38  | 192789.20  |
| 1818298.35 | 2152932.95 | 1325941.40 | 1309811.54 | 1539251.39 | 2300368.46 | 1428309.81 | 1438854.21 | 1305708.02 |
| 1120813.86 | 1190928.13 | 753052.32  | 528989.29  | 560966.26  | 1242987.30 | 750611.04  | 729461.75  | 841536.72  |
| 10954.48   | 13839.43   | 7156.96    | 20282.75   | 35852.27   | 14966.84   | 7413.72    | 7433.64    | 19354.62   |
| 439909.22  | 517822.64  | 301145.54  | 268770.45  | 277753.65  | 564179.78  | 352695.46  | 362638.49  | 225035.12  |
| 264657.20  | 309832.06  | 187879.09  | 152178.46  | 161127.04  | 322470.47  | 203076.10  | 201117.66  | 76067.28   |
| 12189.51   | 15136.75   | 11435.82   | 13160.74   | 17686.22   | 15927.34   | 8002.89    | 8621.04    | 19700.14   |
| 730880.83  | 858599.72  | 514709.06  | 490144.63  | 552914.16  | 918014.35  | 568112.60  | 578255.01  | 525977.02  |
| 755719.11  | 907434.73  | 539828.18  | 478144.47  | 486656.41  | 959173.38  | 618498.64  | 620980.39  | 782847.14  |
| 363438.86  | 425112.85  | 251462.52  | 216178.96  | 224975     | 455171.75  | 286782.20  | 291378.95  | 136969.28  |
| 0          | 0          | 0          | 0          | 3          | 0          | 0          | 0          | 0          |
| 596624.78  | 703446.75  | 411931.49  | 373833.14  | 386456.42  | 761933.91  | 480968.96  | 492200.97  | 346473.88  |
| 61297.09   | 75847.46   | 45653.87   | 43766.76   | 47666.93   | 82884.87   | 47446.53   | 49448.96   | 48955.36   |

|            |            |            |            |            |            |            |            |            |
|------------|------------|------------|------------|------------|------------|------------|------------|------------|
| 0          | 0          | 0          | 0          | 3          | 0          | 0          | 0          | 0          |
| 92771.84   | 107429     | 64165.35   | 52635.11   | 53802.23   | 115412.43  | 72694.61   | 72537      | 71750.72   |
| 41620.16   | 50758.65   | 28615.98   | 26038.66   | 25987.10   | 56340.37   | 33601.17   | 34949.65   | 27052.02   |
| 51930.47   | 59193      | 36903.50   | 34430.17   | 41101.66   | 61989.10   | 40136.81   | 40622.20   | 12015.46   |
| 120095.57  | 142028.65  | 80135.16   | 76320.97   | 82081.59   | 154035.73  | 94946.68   | 98286.58   | 79747.40   |
| 460942.51  | 554825.51  | 335907.48  | 301314.69  | 328029.35  | 591489.73  | 371414.71  | 373348.71  | 380075.24  |
| 115196.87  | 124715.97  | 83516.45   | 76079.49   | 99128.99   | 133496.82  | 78221.44   | 76404.37   | 123658.32  |
| 516337.73  | 577466.07  | 348612.08  | 282222.59  | 289189.42  | 611945.73  | 380829.83  | 383006.04  | 284482.20  |
| 1059841.69 | 1240138.99 | 760428.78  | 722751.15  | 834130.20  | 1328809.38 | 822847.62  | 830345.59  | 869914.30  |
| 24856.15   | 34046.22   | 20985.34   | 17630.48   | 18554.02   | 36327.25   | 22728      | 23358.57   | 23746.32   |
| 657483.40  | 780479.81  | 469574.61  | 515509.51  | 643223.75  | 833744.22  | 503665.73  | 515204.34  | 877361.26  |
| 417068.34  | 493098.21  | 302076.55  | 284128.68  | 317634.55  | 523187.14  | 326490.64  | 330721.31  | 318536.52  |
| 297615.93  | 359040.61  | 212699.42  | 206065.72  | 227226.16  | 389588.16  | 242507.28  | 248068.59  | 224076.62  |
| 115733.56  | 125800.09  | 81285.44   | 81120.20   | 101706.32  | 137336.23  | 80406.58   | 79883.64   | 41672.14   |
| 74266.68   | 86047.11   | 52532.91   | 43655.32   | 44143.76   | 90680.13   | 58563.72   | 59578.24   | 51151.68   |
| 93113.31   | 107148.49  | 64641.91   | 53505.15   | 54736.26   | 113413.45  | 72788.18   | 72697.87   | 37933.94   |
| 29942.11   | 32394.19   | 21949.22   | 19400.09   | 25007.75   | 34104.77   | 19980.09   | 19566.41   | 39630.20   |
| 49006.73   | 57955.39   | 34044.55   | 29187.98   | 29628.37   | 63075.25   | 39570.72   | 40241.15   | 11807.80   |
| 1347022.30 | 1570736.45 | 932413.50  | 888501.88  | 1003101.50 | 1684210.29 | 1036398.08 | 1055451.75 | 989048.92  |
| 85489.49   | 89460.01   | 57447.49   | 38907.01   | 41857.99   | 92720.68   | 57060.51   | 55171.87   | 16857.48   |
| 629453.31  | 737477.57  | 454499.65  | 402648.69  | 460691.93  | 783653.53  | 487576.53  | 482604.26  | 461390.36  |
| 172502.82  | 196410.76  | 115649.49  | 94363.18   | 95699.63   | 206023.54  | 126182.46  | 129155.78  | 90492.18   |
| 1075477.95 | 1284661.73 | 769409.29  | 735885.09  | 825335.69  | 1372476.46 | 850786.33  | 862780.88  | 713828.16  |
| 1005527.55 | 1194394.03 | 734475.65  | 648234.22  | 703489.25  | 1278201.79 | 797035.70  | 805183.21  | 676209.64  |
| 8381.45    | 10467.05   | 5767.84    | 10475.65   | 14648.77   | 12188.14   | 5907.83    | 6058.64    | 18754.82   |
| 1086       | 1991       | 619        | 1136       | 983        | 1349.34    | 754        | 1237.18    | 438        |
| 954324.58  | 1125613.14 | 690568.85  | 649018.05  | 750956.28  | 1199900.26 | 737927.71  | 742678.33  | 679199.40  |
| 3847081.96 | 4418817.96 | 2710275.82 | 2295623.45 | 2525276.13 | 4665742.65 | 2922670.58 | 2904688.05 | 2694629.38 |
| 143940.15  | 162771.69  | 101791.15  | 70527.35   | 74144.65   | 161483.16  | 101646.85  | 97476.43   | 29240.80   |
| 179467.58  | 200170.74  | 125070.57  | 111674.38  | 130784.58  | 214883.67  | 129918.29  | 130237.32  | 141213.52  |
| 91219.44   | 109261.85  | 67586.04   | 59929.67   | 66014.32   | 117131.92  | 74408.81   | 73941.35   | 71648.10   |
| 45708      | 51288.67   | 29213.35   | 22601.65   | 22625      | 50657.65   | 26943      | 29758.44   | 10792      |
| 1947397.21 | 2327494.17 | 1416342.20 | 1374042.92 | 1575727.08 | 2502459.14 | 1571193.01 | 1584007.81 | 1408879.66 |
| 83060.42   | 85558.36   | 61094.48   | 50951.86   | 63158.82   | 87225.11   | 54317.37   | 50981.42   | 116446.54  |



|            |            |            |           |            |            |            |            |            |
|------------|------------|------------|-----------|------------|------------|------------|------------|------------|
| 1220780.56 | 1452730.24 | 890756.93  | 868397.51 | 1008316.42 | 1553469.25 | 967508.39  | 978171.51  | 748072.82  |
| 184554.05  | 220055.91  | 135942.03  | 136983.10 | 164448.83  | 236241.17  | 146878.45  | 148398.88  | 111931.92  |
| 39726.79   | 45013.30   | 33098.80   | 29057.60  | 33849.63   | 50439.12   | 29743.04   | 30693.41   | 92772.96   |
| 64210.74   | 78529.93   | 46282.79   | 51993     | 62590.61   | 86569.88   | 54480.53   | 55131.62   | 66454.54   |
| 58450.66   | 73311.68   | 44343.66   | 31620.34  | 32286.66   | 68762.48   | 44586.34   | 42304.56   | 12383.32   |
| 10739.83   | 12500.34   | 7036.17    | 5185.50   | 5533.33    | 14574.82   | 7462       | 7742.67    | 2350       |
| 96875.93   | 113708.08  | 69125.85   | 63016.61  | 68141.20   | 119050.64  | 77269.51   | 76035.15   | 55708.48   |
| 718130.53  | 848993.37  | 526884.93  | 505095.26 | 594518.43  | 904835.06  | 561386.93  | 562560.70  | 454673     |
| 345547.17  | 428624.73  | 250455.48  | 230602.94 | 245305.11  | 458909.86  | 286093.30  | 288749.16  | 203804.54  |
| 1176087.13 | 1357764.79 | 820685.59  | 727365.90 | 803278.38  | 1450935.58 | 893408.20  | 904103.56  | 658535.06  |
| 0          | 0          | 7          | 0         | 0          | 134        | 0          | 0          | 0          |
| 1424420.21 | 1692796.27 | 1004702.31 | 878438.84 | 901144     | 1819488.55 | 1142940.39 | 1152714.89 | 1007885.52 |
| 472.98     | 1352.81    | 1236.22    | 1734.20   | 538.94     | 1197.02    | 164.72     | 156.98     | 16888.66   |
| 31123      | 36647.50   | 22005      | 17446.50  | 17318      | 36942.90   | 21137      | 22623.90   | 7230       |
| 261095.99  | 291607.13  | 175569.07  | 164197.56 | 194472.97  | 312966.75  | 184090.08  | 189171.84  | 159795.80  |
| 0          | 0          | 0          | 0         | 0          | 0          | 0          | 0          | 0          |
| 0          | 0          | 0          | 0         | 3          | 0          | 0          | 0          | 0          |
| 26429.13   | 33608.31   | 19222.50   | 18394.47  | 19380.77   | 39126.70   | 23476      | 24430.81   | 23949.86   |
| 392268.78  | 435035.59  | 259541.58  | 219722.67 | 237821.11  | 462856.19  | 287619.73  | 292355.26  | 123267.12  |
| 127788.13  | 144003.34  | 90678.76   | 68272.43  | 70628.71   | 149834.15  | 95428.43   | 94114.90   | 44177.72   |
| 0          | 0          | 0          | 0         | 3          | 0          | 0          | 0          | 0          |
| 167260.39  | 196374.67  | 118398.88  | 102916.37 | 110227.16  | 209273.74  | 129992.84  | 130670.71  | 122606.84  |
| 0          | 0          | 0          | 0         | 0          | 0          | 0          | 0          | 0          |
| 141646.53  | 153188.64  | 96426.14   | 76126.69  | 82989.83   | 157860.26  | 95256.53   | 95069.49   | 147530.80  |
| 449533.63  | 514113.53  | 315039.71  | 302812.14 | 360634.12  | 545779.69  | 334229.47  | 338512.08  | 355263     |
| 169274.92  | 191711.63  | 117025.56  | 99839.74  | 107077.76  | 202397.47  | 128776.28  | 128688.35  | 88713.22   |
| 73325.16   | 90961.73   | 50056.28   | 48194.69  | 46252.36   | 98139.86   | 59861.96   | 62080.50   | 68930.94   |
| 45606.25   | 55532.39   | 32060.67   | 29358.15  | 28989.02   | 60456.74   | 38547.75   | 39148.07   | 27905.32   |
| 130109.70  | 148618.97  | 86954.81   | 79540.93  | 86467.87   | 161481.35  | 97953.12   | 101157.36  | 114061.56  |
| 965564.55  | 1061582.24 | 664425.08  | 479619.86 | 501658.23  | 1089018.89 | 671413.52  | 652743.94  | 812631.62  |
| 393772.10  | 463594.09  | 286097.91  | 286524.27 | 346175.99  | 498194.08  | 305422.32  | 308393.64  | 227587.52  |
| 564429.08  | 654972.89  | 384781.85  | 333042.67 | 337911.48  | 706972.68  | 452871.67  | 459880.16  | 202837.06  |
| 587976.59  | 698600.27  | 416007.74  | 360876.24 | 359041.43  | 735798.54  | 480054.49  | 480464.50  | 489971.28  |
| 818957.03  | 976056.58  | 596807.66  | 593567.80 | 701795.95  | 1045743.90 | 648600.40  | 652044.10  | 564713.64  |



|            |            |           |           |            |            |            |            |           |
|------------|------------|-----------|-----------|------------|------------|------------|------------|-----------|
| 272190.74  | 333882.65  | 198300.68 | 193828.09 | 213423.11  | 357377.80  | 224470.34  | 229169.47  | 218927.90 |
| 374563.48  | 446162.55  | 275247.85 | 267351.67 | 309789.16  | 478401.51  | 296658.12  | 300774.60  | 225576.44 |
| 363912.23  | 451913.43  | 284210.07 | 430913.71 | 644067.64  | 486289.57  | 292660.04  | 294571.33  | 527068.18 |
| 60         | 111.14     | 9.16      | 177.42    | 10.28      | 28         | 44         | 200        | 0         |
| 204510.83  | 234847.61  | 146502.20 | 145631.14 | 184721.19  | 250900.27  | 145950.69  | 146544.76  | 262271.90 |
| 1050035.90 | 1244866.20 | 766349.59 | 806260.91 | 1015541.46 | 1340013.73 | 816563.48  | 830024.56  | 922641.50 |
| 966429.59  | 1188316.20 | 698655.93 | 737491.35 | 845763.34  | 1286151.48 | 802623.59  | 814058.83  | 678231.04 |
| 548441.09  | 621268.13  | 369209.33 | 314252.08 | 331250.52  | 657738.05  | 407621.95  | 413105.15  | 275687.80 |
| 1366440.72 | 1625569.01 | 960612.61 | 859803.18 | 916449.98  | 1778128.47 | 1090587.57 | 1105498.41 | 896905.56 |
| 36866.60   | 52781.68   | 27719.11  | 46170.09  | 58641.54   | 60419.25   | 30264.61   | 33677.64   | 111836.02 |
| 140039.10  | 169664.03  | 122136.86 | 403063.56 | 741941.76  | 181390.76  | 102731.70  | 102216.65  | 587461.56 |
| 20137.87   | 25793.27   | 14008.96  | 18830.49  | 22629.52   | 29275.98   | 15803.83   | 16728.91   | 21607.54  |
| 0          | 0          | 7         | 0         | 0          | 134        | 0          | 0          | 0         |
| 1366323.99 | 1517728.78 | 917787.45 | 746039.62 | 803494.64  | 1607426.81 | 992589.99  | 1001344.14 | 509804.66 |
| 183563.48  | 218482.32  | 129850.22 | 130362.16 | 154513.08  | 233976.40  | 146263.59  | 147860.64  | 111471.50 |
| 408767.26  | 475698.46  | 280160.05 | 258781.32 | 271198.96  | 517824.77  | 332829.94  | 340699.20  | 150568.46 |
| 0          | 13.50      | 0         | 0         | 0          | 0          | 0          | 0          | 0         |
| 0          | 0          | 0         | 0         | 0          | 0          | 0          | 0          | 0         |
| 1243379.95 | 1410833.23 | 852647.84 | 737100.22 | 811260.79  | 1492730.20 | 926986.12  | 935771.29  | 604949.22 |
| 0          | 0          | 0         | 0         | 3          | 0          | 0          | 0          | 0         |
| 71634.86   | 82500.30   | 50908.20  | 53767.19  | 70600.64   | 84871.59   | 54322.72   | 53192.32   | 32446.58  |

| A20        | A3         | A4         | A5         | A6          | A7         | A8         | A9         | B1          |   |
|------------|------------|------------|------------|-------------|------------|------------|------------|-------------|---|
| 0          | 0          | 0          | 0          | 0           | 0          | 0          | 0          | 0           | 0 |
| 553309.59  | 1654878    | 671947.39  | 892981.89  | 1384325.40  | 1638581.19 | 1685867.34 | 1290126.20 | 1118368.75  |   |
| 2259460.70 | 5773522.21 | 2484960.66 | 4557422.08 | 5574170.45  | 5704317.45 | 5821320.33 | 4406708.17 | 5514091.73  |   |
| 488838.63  | 1143939.07 | 495695.86  | 996756.32  | 995823.41   | 1130981.72 | 1151504.90 | 886586.45  | 872153.80   |   |
| 41991.42   | 126476.28  | 50812.70   | 71921.94   | 132714.17   | 125916.52  | 127114.44  | 93283.35   | 148334.89   |   |
| 17517.37   | 77975.76   | 32691.40   | 7963.02    | 43271.74    | 75885.66   | 78582.75   | 57331.84   | 7212.98     |   |
| 163215.46  | 341166.90  | 165184.36  | 347301.28  | 388867.52   | 332951.18  | 342783.32  | 260782.94  | 444125.22   |   |
| 0          | 0          | 0          | 0          | 0           | 0          | 0          | 0          | 0           | 0 |
| 3908998.84 | 9471354.87 | 4679595.82 | 7703903.63 | 12656651.41 | 9592447.11 | 9503176.69 | 7855466.89 | 16298404.69 |   |
| 34891.16   | 90399.92   | 42029.94   | 69202.44   | 84001.77    | 88279.54   | 89224.70   | 73067.55   | 78064.41    |   |
| 169911.36  | 648358.92  | 254292.90  | 180269.42  | 419516.83   | 636546.02  | 659391.59  | 483519.75  | 196351.89   |   |
| 769940.02  | 1828543.79 | 762380.54  | 1499244.06 | 1337902.88  | 1809799.19 | 1846342.43 | 1405563.08 | 873766.07   |   |
| 19806.34   | 88382.84   | 33569.50   | 8724.02    | 54484.02    | 89080.34   | 88718.68   | 83765.48   | 8677.32     |   |
| 10150.73   | 52859.04   | 40475.20   | 6947.73    | 63717.45    | 51881.27   | 53610.77   | 42159.50   | 72521.60    |   |
| 32         | 187        | 31         | 15         | 186         | 98         | 109        | 743        | 17          |   |
| 17423.37   | 77932.09   | 32688.07   | 7685.35    | 43234.08    | 75871.66   | 78582.75   | 57326.51   | 7164.31     |   |
| 263804.54  | 542452.24  | 346017.70  | 634677.72  | 1162436.92  | 534004.64  | 558685.94  | 446171.23  | 1822106.98  |   |
| 200661.42  | 502281.44  | 397774.56  | 366824.32  | 487435.13   | 497193.58  | 505237.04  | 397284.22  | 463436.61   |   |
| 178243.60  | 751390.05  | 278762.63  | 133977.77  | 441288.80   | 747683.30  | 766115.39  | 559397.70  | 135350.48   |   |
| 1426.02    | 547.10     | 10173.60   | 3247.87    | 524.35      | 305.80     | 441.49     | 264.75     | 321.56      |   |
| 330875.79  | 843155.92  | 359832.46  | 540074.95  | 722016.57   | 841424.56  | 850322.92  | 649446.74  | 623742.14   |   |
| 0          | 0          | 0          | 0          | 0           | 0          | 0          | 0          | 0           | 0 |
| 361886.94  | 978772.33  | 403222.35  | 712031.38  | 841495.22   | 964984.46  | 990109.84  | 748382.76  | 719148.51   |   |
| 1645134.67 | 3676411.73 | 1747269.37 | 2913319.59 | 2646016.13  | 3596311.52 | 3663640.41 | 2666661.53 | 1661159.46  |   |
| 48220.67   | 217109.94  | 77987.40   | 43498.27   | 116898.99   | 215092.88  | 221651.32  | 161182.98  | 21317.68    |   |
| 0          | 0          | 0          | 0          | 0           | 0          | 0          | 0          | 0           | 0 |
| 353160.38  | 659331.12  | 285251.49  | 655609.74  | 696674.75   | 652129.16  | 664504.20  | 511922.16  | 741226.38   |   |
| 101710.68  | 326605.83  | 145004.02  | 130549.44  | 179218.77   | 326417.05  | 333507     | 254355.26  | 32248.03    |   |
| 99638.93   | 320969.10  | 143780.96  | 128374.33  | 279787.15   | 316278.57  | 328041.73  | 247273.94  | 232566.54   |   |
| 488040.82  | 1153920.93 | 430099.87  | 774274.43  | 697801.15   | 1147973.05 | 1178900.01 | 893780.99  | 248885.76   |   |
| 375826.06  | 1484560.60 | 556393.92  | 267413.62  | 941494.45   | 1487631.31 | 1522839.41 | 1152781.27 | 406371.29   |   |
| 0          | 0          | 0          | 0          | 0           | 0          | 0          | 0          | 0           | 0 |
| 10625      | 48437.51   | 17087      | 4502       | 25727       | 46937.67   | 50258.16   | 33074      | 4129        |   |

|            |            |            |            |            |            |            |            |            |
|------------|------------|------------|------------|------------|------------|------------|------------|------------|
| 393755.74  | 1224660.82 | 440690.36  | 498150.61  | 767670.47  | 1244426.24 | 1256408.95 | 978897.65  | 316580.02  |
| 0          | 0          | 0          | 0          | 0          | 0          | 0          | 0          | 0          |
| 16911.68   | 9072.68    | 3454.50    | 38095.79   | 71337.47   | 7736.27    | 8816.96    | 5741.50    | 135036.09  |
| 17726.68   | 10947      | 4582.83    | 38441.34   | 7124.75    | 11247      | 11238.61   | 12035.33   | 1079.99    |
| 27396.08   | 114813.48  | 101810.25  | 12182.10   | 68661.20   | 114997.52  | 122229.39  | 103666.41  | 11548.53   |
| 7650.07    | 37183.66   | 28685.75   | 27304.04   | 89651.91   | 34860.84   | 37952.15   | 26728.10   | 140635.32  |
| 5125.50    | 32533.21   | 12865.87   | 3033.08    | 17460.29   | 32898.82   | 32146.34   | 26958.50   | 3032.13    |
| 1279625.66 | 3499293.54 | 1560086.62 | 2283950.48 | 3151381.83 | 3458468.11 | 3567658.48 | 2724329.17 | 2807834.65 |
| 1333742.51 | 3402956.96 | 1828943.17 | 2301148.50 | 3668860.52 | 3355520.49 | 3445962.70 | 2627659.59 | 3997247.58 |
| 0          | 0          | 0          | 0          | 0          | 0          | 0          | 0          | 0          |
| 680.07     | 3927.25    | 50975.20   | 1386.40    | 2694.08    | 2570.48    | 2832.48    | 3542.61    | 1805.57    |
| 513        | 2693       | 823        | 22064      | 1395.90    | 3049       | 2327.60    | 2856.50    | 1780       |
| 19806.34   | 88379.34   | 33569.50   | 8724.02    | 54484.02   | 89080.34   | 88718.68   | 83765.48   | 8677.32    |
| 0          | 0          | 0          | 0          | 0          | 0          | 0          | 0          | 0          |
| 179879.05  | 706286.80  | 323217.73  | 166506.65  | 525151.50  | 691969.77  | 717180.31  | 532003.63  | 336074.82  |
| 117089.61  | 387182.39  | 168188.77  | 141083.90  | 248128.31  | 381097.66  | 391844     | 296545.23  | 105935.40  |
| 171778.46  | 443114.18  | 181232.20  | 364102.02  | 477534.39  | 439763.81  | 445855.34  | 348989.22  | 523220.97  |
| 119525.35  | 342875.92  | 138620.43  | 234425.30  | 288125.67  | 341805.48  | 347162.58  | 261744.11  | 241409.81  |
| 9          | 10         | 0          | 0          | 14         | 0          | 0          | 36         | 0          |
| 17498.37   | 78103.09   | 32783.07   | 73448.35   | 43557.08   | 76043.67   | 78842.75   | 57798.51   | 12668.31   |
| 23.83      | 79.84      | 52         | 15.67      | 62.67      | 80.17      | 117.50     | 68.33      | 2          |
| 0          | 0          | 0          | 0          | 0          | 0          | 0          | 48         | 0          |
| 155287.68  | 507062.65  | 246560.83  | 249108.76  | 311656.12  | 504071.95  | 513413.02  | 384057.83  | 121003.17  |
| 863690.20  | 2890855.74 | 1241345.30 | 1228288.97 | 2269231.71 | 2860031.15 | 2932473.84 | 2202616.98 | 1649637.95 |
| 22175.71   | 98750.83   | 40201.84   | 10114.85   | 90468.38   | 96509.76   | 102728.92  | 78542.83   | 76657.97   |
| 591149.37  | 1421966.29 | 586412.67  | 1222595.12 | 1147011.42 | 1410619.54 | 1440047.73 | 1109842.28 | 906716.15  |
| 24324.56   | 124065.80  | 49581.68   | 12106.96   | 132573.15  | 124705.38  | 131808.84  | 97834.77   | 145579.66  |
| 425924.55  | 987385.30  | 419504.57  | 882275.53  | 616597.89  | 972758.73  | 998686.18  | 749342.46  | 249651.10  |
| 2505.70    | 14170.40   | 4925.66    | 1284.24    | 40138.51   | 13286.12   | 14428.04   | 9919.35    | 68635.36   |
| 218770.48  | 919911.98  | 382130.84  | 150876.19  | 609266.16  | 909046.89  | 941144.65  | 695767.81  | 288186.80  |
| 68547.42   | 240960.69  | 96761.27   | 82858.15   | 140143.58  | 239140.30  | 242721.07  | 198180.33  | 24464.62   |
| 1523.44    | 7316.29    | 26869.51   | 2282.21    | 4224.46    | 6679.20    | 6821.54    | 5570.71    | 940.73     |
| 88186.85   | 258604.02  | 110152.51  | 125282.06  | 210833.80  | 255553.11  | 262044.12  | 200320.62  | 160841.80  |
| 19806.34   | 88379.34   | 33569.50   | 8724.02    | 54484.02   | 89080.34   | 88718.68   | 83765.48   | 8677.32    |

|            |            |            |            |            |            |            |            |            |
|------------|------------|------------|------------|------------|------------|------------|------------|------------|
| 9          | 10         | 0          | 0          | 14         | 0          | 0          | 36         | 0          |
| 241768.86  | 564817.63  | 241651.34  | 509178.21  | 412959.34  | 561496.52  | 570144.85  | 447931.72  | 268444.57  |
| 434039     | 1148049.06 | 471601.02  | 812954.73  | 1114999.31 | 1135473.63 | 1165688.26 | 893359.02  | 1072207.87 |
| 44083.58   | 199806.76  | 123371.94  | 19470.81   | 110941.79  | 193331.86  | 203273.46  | 138466.01  | 18368.47   |
| 24852.38   | 46556.92   | 21357.24   | 42028.51   | 60624.72   | 45498.89   | 50742.43   | 36707.84   | 71826.50   |
| 24709.92   | 47452.82   | 25445.77   | 64313.58   | 60731.23   | 47923.85   | 47447.57   | 40927.93   | 73890.97   |
| 107422.20  | 300860.75  | 161056.53  | 145858.38  | 359112.73  | 314059.96  | 308258.24  | 257665.63  | 432123.10  |
| 33134.50   | 148886.20  | 53912.23   | 14505.95   | 86452.19   | 149506.54  | 149177.11  | 126062.14  | 13958.15   |
| 0          | 0          | 0          | 0          | 0          | 0          | 0          | 0          | 0          |
| 0          | 3.50       | 0          | 0          | 0          | 0          | 0          | 0          | 0          |
| 689093.38  | 2084823.45 | 852703.42  | 1067415.72 | 1486428.84 | 2096465.12 | 2126841.80 | 1654355.28 | 889697.02  |
| 52806.03   | 240277.50  | 86323.05   | 23390.64   | 163603.48  | 245124.22  | 246212.48  | 195761.63  | 88446.47   |
| 101159.23  | 325736.68  | 124500.77  | 150898.27  | 253522.31  | 326155.58  | 329931.73  | 273825.96  | 169154.73  |
| 365003.69  | 926044.98  | 444767.32  | 700799.25  | 908835.38  | 915850.34  | 930954.03  | 729181.29  | 911421.88  |
| 68816.54   | 236175.48  | 129869.91  | 84008.21   | 207373.64  | 225939     | 241858.62  | 193418.88  | 160034.58  |
| 574224.74  | 1974432.78 | 854422.10  | 612158.61  | 1290612.39 | 2004752.48 | 2004236.74 | 1594960.83 | 591487.13  |
| 1633647.76 | 5467873.47 | 2435750.80 | 2113265.80 | 3765031.26 | 5380430.54 | 5623589.92 | 4243725.62 | 1969526.92 |
| 30362.44   | 134057.69  | 61851.24   | 36221.32   | 138937.36  | 133805.08  | 136199.28  | 103832.20  | 149704.79  |
| 665999.32  | 1880167.06 | 844855.04  | 1068044.13 | 1788267.24 | 1877174.20 | 1895909.50 | 1474150.61 | 1742044.02 |
| 171703.67  | 658978.44  | 243997.15  | 187129.83  | 459879.46  | 668209.53  | 674475.16  | 526987.02  | 265731.14  |
| 53763.10   | 170238.30  | 67995.17   | 79117.15   | 128056.25  | 166832.99  | 171389.97  | 123654.68  | 84615.01   |
| 31733.05   | 76492.76   | 31090.93   | 67131.30   | 75623.37   | 75170.33   | 77130.26   | 58298.34   | 76442.97   |
| 417553.38  | 1626284.98 | 698729.52  | 378577.48  | 993892.11  | 1611273.57 | 1644905.87 | 1222167.15 | 356917.07  |
| 532        | 2072       | 738        | 319        | 1447       | 2375       | 3070       | 2334       | 196        |
| 9          | 10         | 0          | 0          | 14         | 0          | 0          | 36         | 0          |
| 2437418.44 | 6215876.03 | 2854766.01 | 4305319.55 | 5865548.95 | 6368666.78 | 6225087.24 | 5181529.81 | 5652336.30 |
| 69705.70   | 309303.41  | 141653.95  | 29795.77   | 163640.78  | 304109.98  | 313634.54  | 221258.13  | 27465.65   |
| 593        | 2821.67    | 911.67     | 461.80     | 1343.87    | 3231       | 2263.10    | 2683.08    | 383.50     |
| 31308.71   | 74639.26   | 30503.70   | 66448.78   | 42411.48   | 74188.30   | 75419.64   | 57052.34   | 8622.99    |
| 314302.80  | 912242.60  | 335826.49  | 432859.22  | 530711.48  | 924480.54  | 935296.45  | 728285.81  | 154475.44  |
| 1163.50    | 5829.50    | 1854       | 626.40     | 3264.90    | 4234.70    | 5974.55    | 9039       | 750.05     |
| 1764601.63 | 4156718.55 | 1701899.07 | 3715163.77 | 4191260.97 | 4084183.49 | 4190174.54 | 3161055.99 | 4328397.44 |
| 0          | 3.50       | 0          | 0          | 0          | 0          | 0          | 0          | 0          |
| 58529.82   | 198959.59  | 180493.37  | 81556.70   | 178261.63  | 199525.78  | 200412.17  | 158365.11  | 155996.37  |

|            |            |            |            |            |            |            |            |            |
|------------|------------|------------|------------|------------|------------|------------|------------|------------|
| 538424.02  | 1235842.80 | 511434.18  | 1122611.85 | 1113729.78 | 1217535.99 | 1247616.25 | 941615.31  | 1019993.47 |
| 2510       | 14005      | 4587       | 1087       | 7561       | 13775      | 14796      | 10110      | 1125       |
| 842706.36  | 2005256.14 | 889941.25  | 1718646.54 | 2013225.21 | 1972698.35 | 2024377.40 | 1545958.82 | 2051488.15 |
| 35.83      | 89.84      | 52         | 15.67      | 76.67      | 80.17      | 117.50     | 152.83     | 2          |
| 0          | 0          | 0          | 0          | 0          | 0          | 0          | 0          | 0          |
| 286179.90  | 703173.83  | 283506.71  | 579801.66  | 653168.44  | 696326.30  | 706435.05  | 540974.06  | 619318.45  |
| 0          | 0          | 0          | 0          | 0          | 0          | 0          | 0          | 0          |
| 18264.68   | 17224.35   | 5623.50    | 38906.79   | 75866.97   | 16641.27   | 18525.96   | 14304.50   | 135778.09  |
| 19806.34   | 88379.34   | 33569.50   | 8724.02    | 54484.02   | 89080.34   | 88718.68   | 83765.48   | 8677.32    |
| 51391.91   | 175360.98  | 60711.47   | 53882.28   | 96500.20   | 180643.72  | 184214.98  | 138028.60  | 15922.45   |
| 0          | 30.17      | 3          | 0          | 43         | 63         | 0          | 0          | 20         |
| 2380       | 10743.50   | 4074.90    | 1084.92    | 6519.10    | 10862.70   | 12329      | 8553       | 917.16     |
| 168181.68  | 483524.44  | 183410.83  | 223706.29  | 366724.73  | 479408.06  | 491271.53  | 376964.06  | 248219.77  |
| 630919.75  | 2158787.41 | 954157.86  | 887771.01  | 1601604.97 | 2137585.28 | 2185597.16 | 1685060.95 | 1034913.40 |
| 502854.04  | 1809604.49 | 903248.09  | 661427.10  | 1507789.38 | 1796098.70 | 1838247.24 | 1461061.02 | 1200325.41 |
| 1037256.68 | 3194078.09 | 1288399.67 | 1540583.89 | 2425423.99 | 3177801.29 | 3234491.30 | 2470856.99 | 1670806.81 |
| 11904.36   | 57479.76   | 24558.37   | 27153.44   | 30428.41   | 56084.30   | 58840.46   | 41122.51   | 6694       |
| 696557.42  | 1396680.40 | 686005.02  | 1588281.12 | 2450658.35 | 1354731.17 | 1416807.10 | 1099565.03 | 3607150.31 |
| 663447.81  | 1785305.66 | 861450.31  | 1182303.42 | 1384125.12 | 1761782.40 | 1803575.98 | 1442556.37 | 941432.17  |
| 134818.60  | 380311.49  | 164890.12  | 155408.46  | 310982.63  | 369821.77  | 383993.03  | 276964.55  | 239916.57  |
| 128662.81  | 389303.31  | 140789.25  | 173261.77  | 211132.71  | 393261.05  | 398659.24  | 307278.75  | 37073.93   |
| 3226546.30 | 8810689.02 | 3869191.35 | 5179181.49 | 7625185.45 | 8699185.02 | 8920720.05 | 6721246.45 | 6564583.86 |
| 1744280.81 | 4407894.25 | 1941829.86 | 3383119.58 | 4178405.54 | 4363088.80 | 4438803.01 | 3386447.17 | 4001818.28 |
| 21359.68   | 30399.83   | 9211.50    | 40212.55   | 16583.14   | 31871      | 30923.87   | 24884.83   | 2625.09    |
| 1789.04    | 7434.23    | 7519.87    | 771.94     | 4446.98    | 8626.62    | 8880.71    | 7716.01    | 684.66     |
| 17         | 44.50      | 35         | 12.88      | 41.12      | 27         | 55         | 69.75      | 0          |
| 154508.85  | 12414.59   | 4089.05    | 373421.12  | 205850.70  | 9007.57    | 9355.44    | 6507.31    | 405600.57  |
| 180434.83  | 435793.80  | 249846.22  | 316842.86  | 698563.20  | 438131.19  | 448736.15  | 358217.68  | 986064.67  |
| 0          | 0          | 0          | 0          | 0          | 0          | 0          | 0          | 0          |
| 54367.47   | 235255.26  | 97534.59   | 27353.91   | 127114.17  | 228174.15  | 237940.08  | 172261.78  | 21271.14   |
| 261602.49  | 632323.89  | 313046.67  | 514195.98  | 620958.47  | 619465.98  | 642605.21  | 490098.35  | 609295.17  |
| 35         | 124.17     | 42         | 12         | 118.90     | 158.67     | 95.60      | 742.50     | 194        |
| 9          | 10         | 0          | 0          | 14         | 0          | 0          | 36         | 0          |
| 4104.20    | 23873.67   | 21932.05   | 47356.84   | 84041.52   | 23731.67   | 25305.98   | 23574.26   | 140691.45  |

|            |            |            |            |            |            |            |            |            |
|------------|------------|------------|------------|------------|------------|------------|------------|------------|
| 400783.59  | 1438960.95 | 581801.70  | 475514.12  | 1024137.24 | 1439786.60 | 1469082.22 | 1107100.57 | 610700.95  |
| 9          | 18         | 4          | 0          | 14         | 10         | 40         | 36         | 4          |
| 6301.53    | 37032.91   | 16629.37   | 24818.77   | 19811.74   | 36653.46   | 38151.80   | 28283.18   | 4817       |
| 9          | 18         | 4          | 0          | 14         | 10         | 40         | 36         | 4          |
| 39757.87   | 170611.77  | 61111.36   | 16930.23   | 92532.48   | 165291.68  | 174970.64  | 120373.26  | 15387.79   |
| 349520.25  | 857842     | 358539.19  | 758850.57  | 872012.25  | 851733.72  | 866679.64  | 667979.83  | 909733.09  |
| 690981.86  | 1712718.12 | 747468.65  | 1419588.51 | 1611970.52 | 1679606.61 | 1721471.87 | 1292929.12 | 1547677.64 |
| 118764.81  | 401968.40  | 169009.90  | 159321.34  | 324535.21  | 401662.03  | 413729.34  | 315151.84  | 243073.41  |
| 786696.06  | 1891749.29 | 792649.60  | 1451546.87 | 1468850.98 | 1884428.82 | 1911337.50 | 1468187.41 | 1080836.97 |
| 445652.26  | 1169394.15 | 457650.91  | 733584.78  | 1078013.05 | 1162385.18 | 1182634.44 | 907635.36  | 994078.51  |
| 88707.85   | 267745.10  | 104885.74  | 128995.50  | 219139.12  | 267811.40  | 269037.63  | 218082.83  | 162285.65  |
| 1284911.72 | 3602723.60 | 1533742.67 | 2118637.03 | 3125265.25 | 3544340.48 | 3643605.98 | 2747150.52 | 2671482.75 |
| 0          | 0          | 0          | 0          | 0          | 0          | 0          | 207        | 0          |
| 78667.49   | 150876.26  | 66371.94   | 172169.15  | 148188.39  | 149112.95  | 151956.64  | 114592.70  | 152024.01  |
| 2079.50    | 9300.34    | 3617.86    | 22963.88   | 5627.47    | 8873.27    | 9738.59    | 7069.33    | 2653.08    |
| 1062994.80 | 2850682    | 1218792.10 | 1928063.36 | 2510531.62 | 2806164.55 | 2882367.95 | 2180816.57 | 2200437.19 |
| 61202.28   | 144370.75  | 59256.42   | 109897.37  | 146238.08  | 144580.63  | 147252.92  | 110681.69  | 150278.59  |
| 342927.22  | 1010296.59 | 438848.78  | 531056.62  | 788834.44  | 995833.37  | 1026591.42 | 760467.42  | 576763.57  |
| 1087541.35 | 2527745.37 | 1088685.04 | 1949881.48 | 2324215.30 | 2518757.27 | 2553826.34 | 1974424.80 | 2149623.33 |
| 120627.37  | 342110.02  | 142101.22  | 212441.97  | 328807.51  | 336870.23  | 345205.81  | 277833.75  | 307794.16  |
| 6701       | 34969.18   | 11640      | 3074.68    | 20031.88   | 34139.34   | 37662.64   | 29478.82   | 3028.16    |
| 213706.96  | 756172.22  | 293770.07  | 299949.59  | 483953.03  | 758887.27  | 777139.53  | 593101.28  | 213924.20  |
| 1254969.77 | 2982143.13 | 1294488.73 | 2554272.55 | 3096585.82 | 2937558.99 | 3008503.09 | 2298795.75 | 3245194.78 |
| 333501.99  | 1601495.63 | 808023.48  | 162392.31  | 923949.70  | 1639006.83 | 1658985.63 | 1386123.34 | 152988.75  |
| 3232.70    | 17452.84   | 11063.14   | 2067.95    | 108840.20  | 16447.68   | 18683.08   | 13858.10   | 203727.61  |
| 176781.10  | 741989.55  | 276395.63  | 133273.43  | 436504.46  | 737628.13  | 756430.22  | 551101.04  | 134679.15  |
| 106851.93  | 418101.92  | 161551.94  | 101493.74  | 270150.84  | 419093.93  | 426029.44  | 339399.06  | 107961.58  |
| 19017.74   | 20400.78   | 21749.17   | 83859.39   | 45232.78   | 19509.98   | 20535.98   | 16333.35   | 73297.23   |
| 457430.17  | 1200885.48 | 609157.93  | 808540.92  | 1026536.48 | 1191562.76 | 1217546.35 | 932085.04  | 868327.88  |
| 312505.08  | 1257197.55 | 787908.35  | 206587.14  | 774312.27  | 1240427.50 | 1272803.92 | 950232.59  | 255577.15  |
| 146278.17  | 591443.42  | 209992.73  | 206457.17  | 357550.14  | 591309.24  | 615020.58  | 459330.16  | 131221.73  |
| 0          | 0          | 0          | 0          | 0          | 0          | 0          | 0          | 0          |
| 268773.17  | 997612.40  | 422084.48  | 284650.21  | 615193.63  | 995518.07  | 1013365.22 | 753724.35  | 231844.12  |
| 36997.39   | 103962.61  | 50079.50   | 113303.84  | 92858.86   | 103001.42  | 105033.08  | 83964.91   | 82433.61   |



|            |            |            |            |            |            |            |            |            |
|------------|------------|------------|------------|------------|------------|------------|------------|------------|
| 0          | 0          | 0          | 0          | 0          | 0          | 0          | 0          | 0          |
| 33367.11   | 150366.24  | 66218.95   | 16236.15   | 82925.83   | 148203.54  | 153867.54  | 114487.87  | 14039.82   |
| 15449.03   | 71226.87   | 29896.29   | 7280.07    | 39208.59   | 69772.70   | 75582.90   | 52402.25   | 6790.34    |
| 33412.68   | 84279.42   | 28045.43   | 67454.41   | 77567.54   | 84686.44   | 83013.15   | 64904.16   | 76286.48   |
| 44384.22   | 201290.75  | 101669.99  | 20766.08   | 140978.48  | 202137.97  | 207019.45  | 159949.14  | 85201.16   |
| 347366.86  | 769768.81  | 355003.88  | 674066.72  | 559892.83  | 754689.32  | 771157.72  | 586345.09  | 354997.64  |
| 35090.73   | 165746.73  | 65553.56   | 83491.42   | 230967.61  | 169865.32  | 171405.90  | 142801.98  | 291470.84  |
| 247970.38  | 808398.84  | 333538.64  | 288419.59  | 447063.22  | 815842.60  | 825985.94  | 643425.03  | 77481.14   |
| 631149.69  | 1725822.40 | 730385.77  | 1165057.54 | 1621803.11 | 1708351.06 | 1745013.61 | 1331209.44 | 1539820.60 |
| 39809.54   | 47005.92   | 22005.87   | 121285.15  | 26034.28   | 44208.80   | 45868.23   | 33754.18   | 7847.76    |
| 502031.39  | 1084384.48 | 504009.70  | 1045946.80 | 1395290.21 | 1074791.68 | 1089246.07 | 851801.60  | 1739135.74 |
| 341827.93  | 688909.97  | 291156.96  | 724133.06  | 581134.38  | 681743.25  | 687622.12  | 527260.04  | 483548.57  |
| 171311.16  | 505694.47  | 224528.32  | 309582.35  | 406080.39  | 499288.73  | 510808.84  | 378826.66  | 323819.07  |
| 63374.56   | 173434.52  | 60494.03   | 104223.80  | 228051.20  | 175457.08  | 178168.61  | 143096.45  | 288638.67  |
| 26919.04   | 120746.81  | 50039.24   | 55986.03   | 67380.46   | 122221.79  | 124246.97  | 92886.09   | 14847.22   |
| 35518.06   | 147390.91  | 50621.35   | 19529.36   | 82138.10   | 149637.13  | 148676.38  | 119500.16  | 14079.94   |
| 8908.03    | 43429.26   | 19266.41   | 26470.55   | 59220.73   | 44049.23   | 44261.43   | 36901.67   | 73544.57   |
| 17831.37   | 81821.58   | 33477.87   | 7831.22    | 44926.01   | 81094.89   | 83242.60   | 60902.68   | 7327.23    |
| 765764.19  | 2197489.36 | 966061.74  | 1117174.90 | 1866897.09 | 2193330.72 | 2226617.82 | 1712620.62 | 1564996.34 |
| 25277.50   | 121717.02  | 39663.50   | 12002.02   | 69750.02   | 125742.51  | 125891.51  | 103911.48  | 11397.99   |
| 370337.50  | 1005707.58 | 494741.31  | 630569.40  | 873279.59  | 991886.62  | 1021869.90 | 801482.50  | 714919.18  |
| 57368.60   | 274911.30  | 104177.78  | 26204.69   | 150373.71  | 279549.06  | 280743.98  | 221186.83  | 24828.64   |
| 628499.86  | 1784607.24 | 757886.02  | 1086564.96 | 1556537.81 | 1759573.03 | 1802209.76 | 1374300.15 | 1339212.19 |
| 649460.11  | 1658740.55 | 677788.32  | 1318019.98 | 1203491.29 | 1638027.92 | 1672472.44 | 1271509.75 | 801569.64  |
| 2514.70    | 14302.28   | 9906.36    | 1372.27    | 40313.01   | 13358.72   | 14561.44   | 10356.35   | 68722.75   |
| 452        | 2575       | 797        | 168        | 1221.50    | 3011       | 2212       | 2385       | 109        |
| 605134.85  | 1562977.01 | 764062.38  | 1159305.65 | 1458787.32 | 1541801.27 | 1574323.38 | 1221988.85 | 1386322.68 |
| 1871427.80 | 6042400.81 | 2785238.09 | 2457454.26 | 4448212.66 | 6045423.64 | 6163937.10 | 4848722.66 | 2696775.04 |
| 45083.84   | 210096.36  | 73233      | 20726.04   | 124238.04  | 214822.85  | 214610.19  | 187676.96  | 20075.31   |
| 119748.06  | 281385.31  | 120369.61  | 222976.88  | 253913.20  | 280794.74  | 285021.66  | 222165.95  | 232630.42  |
| 48684.95   | 149383.72  | 62916.10   | 96558.55   | 117623.02  | 146544.83  | 151760.06  | 115020.28  | 85262.27   |
| 15943.72   | 69730.34   | 20075      | 13430.52   | 37012.02   | 76844      | 70254.17   | 63829.83   | 5561.98    |
| 1211288.19 | 3241128.14 | 1404552.23 | 2223997.19 | 3020544.34 | 3183657.52 | 3273614.07 | 2453918.84 | 2853073.13 |
| 69492.59   | 116791.05  | 107180.36  | 169520.75  | 138857.61  | 116386.54  | 115952.56  | 96983.33   | 151277.64  |

|           |            |            |            |            |            |            |            |            |
|-----------|------------|------------|------------|------------|------------|------------|------------|------------|
| 802034.53 | 2018340.38 | 822504.23  | 1652490.80 | 1981453.89 | 1987966.45 | 2034990.39 | 1549603.53 | 1987748.59 |
| 142125.21 | 306329.71  | 124388.05  | 305986.10  | 336007.46  | 300657.22  | 308392.71  | 233508.69  | 373171.66  |
| 28295.39  | 66978.10   | 53398.75   | 152857.69  | 69186.16   | 64622.99   | 66880.74   | 46951.93   | 81716.40   |
| 55100.26  | 110536.87  | 53596.14   | 86432.84   | 127867.23  | 106981.68  | 112506.93  | 81525.10   | 145479.67  |
| 19806.34  | 88379.34   | 33569.50   | 8724.02    | 54484.02   | 89080.34   | 88718.68   | 83765.48   | 8677.32    |
| 3921.02   | 17214.51   | 5672.83    | 3009.68    | 9932.01    | 16365.83   | 18561.18   | 15312.99   | 1648.99    |
| 51677.77  | 153896.75  | 73410.71   | 56763.78   | 118852.18  | 153066.55  | 154866.46  | 122981.01  | 82723      |
| 510407.33 | 1171143.21 | 514418.35  | 1083878.97 | 1186325.86 | 1153098.50 | 1179899.46 | 908246.27  | 1216860.51 |
| 174340.39 | 586528.06  | 237219.89  | 258199.10  | 431809.08  | 573041.75  | 593388.49  | 454735.98  | 264672.08  |
| 587912.72 | 1889240.47 | 744416.38  | 901056.91  | 1444971.93 | 1887442.90 | 1926475.97 | 1486209.87 | 1004712.37 |
| 9         | 10         | 0          | 0          | 14         | 0          | 0          | 36         | 0          |
| 578054.57 | 2362325.09 | 1094070.07 | 473363.65  | 1447910.44 | 2337490.39 | 2399263.67 | 1794217.91 | 495629.79  |
| 195.70    | 1042.62    | 10439.77   | 546.09     | 868.11     | 788.11     | 614.21     | 896.76     | 632.77     |
| 9936      | 49948      | 16092      | 26324      | 27725      | 52816      | 48456      | 44745.50   | 5918       |
| 129101.10 | 408383.86  | 161047.68  | 196486.06  | 389209.58  | 413505.90  | 421307.74  | 327709.29  | 377669.39  |
| 0         | 0          | 0          | 0          | 0          | 0          | 0          | 0          | 0          |
| 0         | 0          | 0          | 0          | 0          | 0          | 0          | 0          | 0          |
| 42909.92  | 49432.53   | 22309.80   | 83905.81   | 26250.80   | 46490.06   | 49865.40   | 32645.26   | 4671.12    |
| 161586.39 | 616401.86  | 202937.56  | 136039.77  | 399613.95  | 628627.76  | 633642.52  | 486090.33  | 190375.38  |
| 44051.25  | 191841.65  | 70397.29   | 108815     | 109576.09  | 195476.91  | 203163.88  | 161406.75  | 26184.14   |
| 0         | 0          | 0          | 0          | 0          | 0          | 0          | 0          | 0          |
| 104188.02 | 269813.04  | 112218.57  | 182937.82  | 182168.47  | 268811.24  | 274944.41  | 214520.86  | 96663.85   |
| 0         | 0          | 0          | 0          | 0          | 0          | 0          | 0          | 0          |
| 43349.57  | 213858.24  | 128917.14  | 23127.71   | 151960.13  | 214656.56  | 215808.06  | 175970.15  | 88361.95   |
| 272546.35 | 717747.20  | 321974.42  | 481115.48  | 724991.09  | 718273.34  | 725276.17  | 562920.75  | 750331.90  |
| 73267.49  | 267643.24  | 109753.98  | 86057.11   | 180165.42  | 268869.84  | 271305.07  | 208438.54  | 94015.44   |
| 27514.40  | 125946.74  | 58020.35   | 12317.51   | 68348.22   | 125433.56  | 129056.81  | 97686.59   | 11444.41   |
| 17423.37  | 77932.09   | 32688.07   | 7685.35    | 43234.08   | 75871.66   | 78582.75   | 57326.51   | 7164.31    |
| 75618.63  | 212258.08  | 80000.14   | 96144.47   | 147214.59  | 214368.48  | 217287.95  | 162587.85  | 86072.91   |
| 301914.17 | 1403148.67 | 599275.07  | 144779.99  | 816794.31  | 1440793.92 | 1429804.03 | 1227466.56 | 134548.86  |
| 243935.90 | 641551.78  | 257228.55  | 545980.35  | 721216.14  | 634103.99  | 650449.47  | 499519.54  | 818712.52  |
| 207700.51 | 931528.25  | 338740.69  | 94468.42   | 503123.25  | 933208.38  | 951133.75  | 701082.63  | 84899.70   |
| 218193.03 | 967584.59  | 589297.27  | 98418.01   | 543988.43  | 963353.92  | 978545.12  | 736316.56  | 91999.33   |
| 565143.20 | 1348441.48 | 596939.30  | 1117585.31 | 1414787.72 | 1324249.43 | 1362149.13 | 1039707.83 | 1501169.69 |



|           |            |           |            |            |            |            |            |            |
|-----------|------------|-----------|------------|------------|------------|------------|------------|------------|
| 162808.68 | 466110.15  | 207150.21 | 262009.22  | 385108.87  | 458192.80  | 467872.98  | 349364.25  | 318109.88  |
| 254578.70 | 621195.41  | 251473.84 | 536385.72  | 609764.56  | 611415.84  | 626245.75  | 475056.05  | 612539.12  |
| 346814.69 | 618943.57  | 379069.68 | 901938.72  | 1667428.42 | 596161.38  | 617041.75  | 479783.95  | 2843261.93 |
| 68        | 152        | 140       | 48         | 162.86     | 108        | 230.86     | 188        | 0          |
| 112222.77 | 314107.92  | 131901.28 | 212077.46  | 415311.81  | 317024.40  | 322302.63  | 263817.28  | 508259.58  |
| 871712.20 | 1735847.07 | 780668.51 | 1960326.52 | 2180735.47 | 1713327.39 | 1749741.96 | 1343177.38 | 2696704.63 |
| 597145.88 | 1651639.27 | 893775.25 | 936525.66  | 1682270.50 | 1621488.44 | 1669526.87 | 1251069.13 | 1722663.73 |
| 230868.21 | 865984.26  | 375379.38 | 219230.80  | 542617.72  | 877380.18  | 888684.19  | 698427.92  | 217372.91  |
| 703265.81 | 2261046.52 | 977409.80 | 1029903.39 | 1561222.92 | 2224211.48 | 2349016.64 | 1739052.38 | 841672.72  |
| 59201.62  | 72964.23   | 104721.17 | 118885     | 136505.63  | 70035.77   | 68933      | 57089.42   | 210029.18  |
| 236905.01 | 236723.66  | 289750.92 | 738248.66  | 2225266.07 | 223341.71  | 223902.01  | 178216.96  | 4415437.76 |
| 7207.37   | 35526.63   | 18087.52  | 3766.61    | 52802.35   | 33842.32   | 36724.64   | 25799.76   | 70443.85   |
| 9         | 10         | 0         | 0          | 14         | 0          | 0          | 36         | 0          |
| 644743.10 | 2128645.93 | 737876.92 | 778488.40  | 1327506.81 | 2161490.41 | 2184843.33 | 1698510.45 | 538633.92  |
| 156815.04 | 305415.36  | 123843.30 | 254906.75  | 301417.75  | 300247.74  | 306853.83  | 233575.61  | 298047.36  |
| 171692.01 | 685259.52  | 249494.71 | 136939.48  | 437310.18  | 684257.93  | 693712.77  | 505411.49  | 198832.50  |
| 0         | 0          | 0         | 0          | 0          | 0          | 0          | 0          | 0          |
| 0         | 0          | 0         | 0          | 0          | 0          | 0          | 0          | 0          |
| 708109.95 | 1971635.53 | 775843.13 | 1059715.25 | 1421797.77 | 1985513.26 | 2006830.44 | 1565761.28 | 869099.44  |
| 0         | 0          | 0         | 0          | 0          | 0          | 0          | 0          | 0          |
| 24587.91  | 110380.59  | 43449.34  | 11797.16   | 159507.72  | 110979.91  | 112567.39  | 91680.27   | 212279.62  |

| B10        | B11        | B12        | B13        | B14        | B15        | B16        | B17        | B18        |   |
|------------|------------|------------|------------|------------|------------|------------|------------|------------|---|
| 0          | 0          | 0          | 0          | 0          | 0          | 0          | 0          | 0          | 0 |
| 948153.79  | 1048842.04 | 1220518.65 | 817871.89  | 968625.05  | 543342.04  | 754266.26  | 262989.06  | 746550.03  |   |
| 3263960.27 | 3668043.32 | 4252245.32 | 2843630.56 | 3362174.47 | 2093322.85 | 2622436.82 | 904516.39  | 2607845.01 |   |
| 652282.89  | 724181.66  | 852851.40  | 557901.38  | 665780     | 332180.08  | 516722.02  | 183682.30  | 514936.37  |   |
| 67879.25   | 81205.14   | 92196.86   | 61581.01   | 72523.45   | 52321.60   | 56661.33   | 20869.48   | 56575.99   |   |
| 44651.16   | 51300.78   | 59225.40   | 39149.92   | 45931.36   | 34742.50   | 36184.33   | 10920.74   | 36153.96   |   |
| 192263.67  | 214329.76  | 253701.84  | 165395.12  | 196518.86  | 243724.14  | 152218.51  | 71219.64   | 152111.17  |   |
| 0          | 0          | 0          | 0          | 0          | 0          | 0          | 0          | 0          |   |
| 5371442.74 | 5642794.74 | 6822871.55 | 4645368.91 | 5549295.93 | 3538662.26 | 4261352.43 | 2080181.12 | 4247649.27 |   |
| 53399.57   | 54947.64   | 69608.89   | 43125.61   | 52724.21   | 65979.63   | 40123.17   | 24637.29   | 40692.37   |   |
| 366926.93  | 425375.76  | 487940.46  | 316659.26  | 378432.35  | 84957.18   | 294211.66  | 72975.18   | 293198.92  |   |
| 1040610.78 | 1169700.64 | 1354294.77 | 900695.14  | 1067270.30 | 466195.92  | 830992.34  | 270613.64  | 825403.76  |   |
| 56747.34   | 50641      | 65847.03   | 42182.32   | 53592.34   | 2167       | 41268.66   | 9813       | 40342.34   |   |
| 28414.34   | 29808.70   | 32522.85   | 25733.33   | 30457.64   | 33580.97   | 23430.50   | 12898.57   | 22377.86   |   |
| 319        | 41         | 81         | 60         | 59         | 0          | 70         | 10         | 59         |   |
| 44651.16   | 51296.64   | 59225.40   | 39149.92   | 45931.36   | 26370.83   | 36184.33   | 10919.41   | 36153.96   |   |
| 319967.03  | 327494.68  | 399335.18  | 256744.34  | 317281.56  | 489022.98  | 236741.79  | 196736.24  | 237364.07  |   |
| 293947.92  | 312132.12  | 377368.32  | 243955.13  | 294967.76  | 246708.78  | 225541.52  | 80582.22   | 226739.31  |   |
| 414805.32  | 491983.70  | 562058.44  | 367555.07  | 435959.78  | 38005.29   | 340804.16  | 76820.99   | 338838.71  |   |
| 159.79     | 109        | 85.38      | 89         | 209.72     | 9339.34    | 15.34      | 2928.66    | 133.62     |   |
| 471679.14  | 534570.16  | 629555.65  | 406661.30  | 487920.35  | 165246.29  | 379142.65  | 129723.77  | 377979.44  |   |
| 0          | 0          | 0          | 0          | 0          | 0          | 0          | 0          | 0          |   |
| 556160.02  | 624865.32  | 724136.70  | 482603.04  | 571102.81  | 342313.35  | 444957.81  | 148491.89  | 442358.13  |   |
| 2049404.54 | 2413415.64 | 2781367.79 | 1805552.29 | 2127915.62 | 869909.15  | 1665009.92 | 597030.81  | 1674651.57 |   |
| 118476.86  | 144986.92  | 163843.81  | 107610.41  | 125337.46  | 18397.83   | 98805.16   | 21081.71   | 98149.19   |   |
| 0          | 0          | 0          | 0          | 0          | 0          | 0          | 0          | 0          |   |
| 370581.74  | 413673.24  | 482265.11  | 322170.38  | 382047.04  | 218607.10  | 296675.50  | 126461.26  | 294669.26  |   |
| 183996.85  | 209871.84  | 241299.90  | 162578.44  | 191542.30  | 98216.49   | 148925.98  | 58241.97   | 147780.64  |   |
| 184870.92  | 208841.34  | 241409.68  | 158390.25  | 189264.70  | 93114.19   | 146650.98  | 45524.11   | 146550.04  |   |
| 650253.99  | 735798.30  | 846320.59  | 568771.37  | 672412.64  | 161052.47  | 523334.97  | 186134.65  | 517808.56  |   |
| 830439.07  | 973832.80  | 1109801.44 | 730849.01  | 863235.99  | 108615.65  | 674145.10  | 180095.69  | 668468     |   |
| 0          | 0          | 0          | 0          | 0          | 0          | 0          | 0          | 0          |   |
| 26964      | 34431      | 37880      | 23841.50   | 28023      | 976        | 22084      | 4574       | 22007.50   |   |

|            |            |            |            |            |            |            |           |            |
|------------|------------|------------|------------|------------|------------|------------|-----------|------------|
| 677043.64  | 760354.50  | 873935.93  | 599166.82  | 714117.13  | 100673.83  | 555289.46  | 151069.75 | 545665.62  |
| 0          | 0          | 0          | 0          | 0          | 0          | 0          | 0         | 0          |
| 5105       | 5949       | 6171.10    | 4470       | 5304       | 2059.47    | 4206.67    | 3496.87   | 4226.50    |
| 7767.27    | 6362.14    | 9136.64    | 4914.33    | 6518       | 2016.47    | 4906.67    | 2948.87   | 4872       |
| 72892.72   | 74590.50   | 91300.78   | 57897.85   | 69294.48   | 25322.66   | 53445.97   | 37772.24  | 52723.07   |
| 21544.01   | 23077.28   | 27189      | 17963.93   | 22268.29   | 83086.01   | 16468.67   | 7933.01   | 16730.47   |
| 15376.33   | 15488      | 17762.83   | 15090.42   | 18235.16   | 3997.83    | 13843.17   | 2676.17   | 12820.67   |
| 2005355.74 | 2211619.32 | 2557397.29 | 1727659.35 | 2050038.06 | 1249775.35 | 1589762.60 | 646091.33 | 1571704.26 |
| 1939316.42 | 2151778.24 | 2488324.80 | 1685868.59 | 1994127.13 | 1096579.10 | 1539159.79 | 635782.78 | 1531739.61 |
| 0          | 0          | 0          | 0          | 0          | 0          | 0          | 0         | 0          |
| 2343.97    | 1005.14    | 3086.71    | 1472.68    | 2062.95    | 44662.83   | 669.34     | 3495.61   | 1262.58    |
| 1147.60    | 1070.28    | 2460.20    | 527        | 1248       | 15         | 900        | 276       | 997        |
| 56747.34   | 50641      | 65847.03   | 42182.32   | 53592.34   | 2167       | 41268.66   | 9813      | 40342.34   |
| 0          | 0          | 0          | 0          | 0          | 0          | 0          | 0         | 0          |
| 402190.54  | 451257.62  | 516573.10  | 350249.63  | 416046.08  | 166158.96  | 322442.14  | 109368.20 | 319418.05  |
| 220913.96  | 248266.20  | 287983.48  | 190961.10  | 226510.69  | 85960.47   | 176706.51  | 60285.73  | 174747.26  |
| 254140.23  | 277084.84  | 329508.97  | 214830.35  | 257821.30  | 173631.61  | 200351.34  | 72780.51  | 199010.11  |
| 190367.70  | 219176.20  | 254913.49  | 167009.35  | 197869.91  | 107846.57  | 154460.33  | 51875.75  | 153808.55  |
| 0          | 0          | 5          | 0          | 0          | 0          | 0          | 0         | 0          |
| 44777.16   | 51510.14   | 59279.90   | 39149.92   | 46006.36   | 26706.83   | 36184.33   | 10953.41  | 36153.96   |
| 47.83      | 59.50      | 36         | 30.50      | 52.67      | 1          | 15.33      | 11        | 34.17      |
| 0          | 0          | 0          | 0          | 0          | 0          | 0          | 0         | 0          |
| 286526.95  | 328770.92  | 375270.69  | 250976.57  | 296688.11  | 77127.11   | 230917.85  | 54099.07  | 229670.17  |
| 1655917.14 | 1869646.20 | 2148708.76 | 1440111.57 | 1697216.02 | 831762.36  | 1325618.14 | 387726.98 | 1318204.03 |
| 59973.10   | 64715.14   | 74507.61   | 49882.41   | 58959.28   | 27076.83   | 45902.16   | 13951.99  | 45212.07   |
| 808929.07  | 898175.22  | 1046192.95 | 695753.96  | 830597.92  | 245106.63  | 643683.19  | 211768.61 | 638021.80  |
| 68522.44   | 77853.42   | 86362.65   | 60215.42   | 72450.47   | 11112.46   | 55297.33   | 13063.98  | 53481.75   |
| 562458.74  | 637712.96  | 736677.83  | 486287.12  | 576130.86  | 265401.15  | 449025     | 149032.33 | 446467.97  |
| 7948.99    | 8504.50    | 9672.89    | 6979.34    | 8580.77    | 22443.83   | 6290.17    | 1747.37   | 6211.36    |
| 531586.71  | 607551.56  | 688732.58  | 461536.51  | 542629.35  | 115485.58  | 425199.98  | 103435.98 | 421531.44  |
| 143707.09  | 150179.28  | 180304.03  | 118039.24  | 143049.48  | 33697.33   | 111452.49  | 29464.11  | 110266.50  |
| 3963.57    | 2871.50    | 4301.68    | 3096.68    | 4221.66    | 15675.16   | 2480.17    | 5222.98   | 2601.41    |
| 148879.37  | 166178.06  | 194286.13  | 127142.26  | 151708.05  | 63621.94   | 118098.34  | 38780.54  | 117631.60  |
| 56747.34   | 50641      | 65847.03   | 42182.32   | 53592.34   | 2167       | 41268.66   | 9813      | 40342.34   |

|            |            |            |            |            |            |            |            |            |
|------------|------------|------------|------------|------------|------------|------------|------------|------------|
| 12         | 0          | 5          | 0          | 0          | 0          | 0          | 0          | 0          |
| 322853.24  | 351805.34  | 415124.68  | 275664.02  | 330272.53  | 77997.10   | 255136.03  | 78898.92   | 252408.54  |
| 656935.33  | 732422.14  | 855955.66  | 564011.74  | 669917.76  | 391581.14  | 520817.29  | 226430.16  | 517904.30  |
| 115905.53  | 136790     | 153671.79  | 100374.37  | 118755.10  | 56471.13   | 91002.84   | 19196.47   | 92708.20   |
| 28452.76   | 30552.42   | 34072.20   | 23230.17   | 28076.06   | 29108.97   | 21425      | 9976.69    | 21001.13   |
| 27563.69   | 26126.64   | 33044.02   | 22613.25   | 27752.67   | 35574.80   | 21056.50   | 10129.52   | 20868.61   |
| 164257.76  | 169721.20  | 201706.34  | 146530.52  | 176477.89  | 116352.74  | 133858.51  | 61958.86   | 131451.03  |
| 89450.93   | 90647.50   | 111572.56  | 72063.99   | 88627.34   | 25122.83   | 68986.49   | 15595.17   | 68276.05   |
| 0          | 0          | 0          | 0          | 0          | 0          | 0          | 0          | 0          |
| 0          | 0          | 0          | 0          | 0          | 0          | 0          | 0          | 0          |
| 1174171.28 | 1311551.04 | 1515933.91 | 1025196.11 | 1218902.53 | 335461.14  | 946298.27  | 321993.58  | 936030.93  |
| 134417.02  | 154225.48  | 182520.87  | 115269.15  | 139427.21  | 23154.46   | 108762.64  | 27484.62   | 108337.23  |
| 194406.12  | 198507.28  | 236373.06  | 160642.07  | 193970.95  | 54265.27   | 150672.98  | 43544.07   | 147801.23  |
| 528593.66  | 580119.46  | 691932.31  | 449124.17  | 538002.77  | 456517.49  | 416627.17  | 171039.01  | 415686.35  |
| 150903.24  | 152939.42  | 177430.15  | 121102.18  | 143386.33  | 67740.92   | 111159.98  | 37098.50   | 108705.71  |
| 1110446.33 | 1216368.20 | 1426165.87 | 966332.73  | 1155148.59 | 271487.63  | 899242.57  | 255175.15  | 887198.75  |
| 3183322.76 | 3566177.72 | 4053490.65 | 2732334.59 | 3231178.25 | 1085802.81 | 2509408.94 | 716739.93  | 2482564.12 |
| 77818.58   | 87771.64   | 102478.43  | 66661.09   | 78645.06   | 42485.76   | 61346.50   | 17996.06   | 61478.35   |
| 1055418.88 | 1178933.14 | 1404895.97 | 911341.02  | 1089750.64 | 473151.16  | 848810.60  | 333765.52  | 846028.63  |
| 362812.37  | 412396.96  | 472807.41  | 324310.06  | 382999.22  | 74794.90   | 299357.48  | 83877.42   | 294480.25  |
| 95079.79   | 113319.06  | 127446.34  | 84490.58   | 98591.92   | 16579.14   | 77213.01   | 21183.06   | 77286.72   |
| 43513.26   | 48890.14   | 57103.70   | 37500.67   | 44413.06   | 43902.97   | 34682      | 12680.07   | 34515.23   |
| 919497.55  | 1060575.12 | 1229265.56 | 796342.72  | 947629.65  | 299967.84  | 739386.66  | 185416.22  | 738033.52  |
| 1503       | 1645       | 1615       | 1195       | 1325       | 58         | 1020       | 234        | 825.67     |
| 12         | 0          | 5          | 0          | 0          | 0          | 0          | 0          | 0          |
| 3477065.71 | 3668534.48 | 4450487.03 | 3053303.90 | 3637429.29 | 1549728.24 | 2799648.36 | 1043502.56 | 2785801.47 |
| 170658.66  | 214148     | 243591.68  | 150155.31  | 177197.30  | 12039.83   | 139598.81  | 29892.37   | 140591.55  |
| 1081.93    | 993        | 2566.13    | 632        | 1335.29    | 4468.67    | 927        | 278.33     | 1087.62    |
| 42308.59   | 48241.64   | 55226.60   | 36707      | 43525.78   | 5159.50    | 33999.50   | 8731.70    | 33770.20   |
| 505397.92  | 568724.10  | 654369.79  | 445340.16  | 531171.84  | 71259.41   | 412461.31  | 117323.43  | 405185.65  |
| 5998.70    | 3274.90    | 6418.90    | 3376       | 3335.75    | 132        | 2479.50    | 505.50     | 2514       |
| 2358811.26 | 2660395.34 | 3100584.55 | 2037642.83 | 2412766.19 | 1775425.48 | 1883887.19 | 690331.76  | 1875200.01 |
| 0          | 0          | 0          | 0          | 0          | 0          | 0          | 0          | 0          |
| 113006.27  | 122482.04  | 143788.04  | 98575.39   | 116721.99  | 81253.58   | 89693.98   | 58196.78   | 89136.98   |

|            |            |            |            |            |            |            |            |            |
|------------|------------|------------|------------|------------|------------|------------|------------|------------|
| 703386.39  | 791700.80  | 919498.17  | 606531.71  | 719054.84  | 402665.10  | 560437.18  | 196285.58  | 557440.39  |
| 7785       | 8880       | 9291.50    | 6910       | 8370       | 366        | 6437       | 1179       | 6234       |
| 1146935.36 | 1273219.28 | 1482908.82 | 986658.93  | 1169580.23 | 924396.45  | 910556.85  | 331034.71  | 905328.89  |
| 211.83     | 81.50      | 41         | 30.50      | 52.67      | 1          | 15.33      | 11         | 34.17      |
| 0          | 0          | 0          | 0          | 0          | 0          | 0          | 0          | 0          |
| 395571.51  | 442945.26  | 525949.23  | 338786.19  | 405866.09  | 266092.92  | 316102.83  | 108955.60  | 315237.04  |
| 0          | 0          | 0          | 0          | 0          | 0          | 0          | 0          | 0          |
| 9645       | 10727      | 11241.60   | 8308       | 10034      | 2307.47    | 7706.67    | 4173.87    | 7327.50    |
| 56747.34   | 50641      | 65847.03   | 42182.32   | 53592.34   | 2167       | 41268.66   | 9813       | 40342.34   |
| 96953.38   | 109726.06  | 122448.23  | 87071.84   | 103566.51  | 43312.33   | 80257.33   | 20761.07   | 78752.49   |
| 0          | 0          | 0          | 0          | 0          | 0          | 0          | 0          | 0          |
| 6987       | 7889.50    | 8115       | 5828.75    | 6738.50    | 22026      | 5253       | 1022       | 5160.20    |
| 271262.90  | 311349.26  | 362197.76  | 235715.74  | 279964.17  | 59691.92   | 218459.82  | 69949.64   | 216896.83  |
| 1247262.52 | 1380468.68 | 1605779.38 | 1068067.94 | 1268721.27 | 438477.85  | 988660.96  | 285007.97  | 980460.20  |
| 1056949.43 | 1143538.92 | 1347661.44 | 894525.25  | 1065713    | 619240.51  | 827334.89  | 298241.67  | 819804.37  |
| 1824393.25 | 2033380.92 | 2359617.37 | 1578161.40 | 1869879.30 | 644184.92  | 1459042.95 | 411461.02  | 1448090.16 |
| 31410.75   | 38336.14   | 44145.56   | 27154.17   | 32858.07   | 4383.83    | 25422.83   | 5318.37    | 25307.53   |
| 820804.10  | 878457.32  | 1038314.03 | 678554.16  | 814392.94  | 839185.31  | 626699.32  | 366022.35  | 622866.17  |
| 1052472.35 | 1112892.50 | 1305502.77 | 889189.72  | 1057361.43 | 492136.40  | 820186.77  | 279868.28  | 808641.05  |
| 218105.02  | 260924.50  | 297088.57  | 189692.99  | 220610.43  | 167973.23  | 174468.84  | 56535.55   | 174761.90  |
| 212629.80  | 244889.34  | 282049.55  | 188828.58  | 225017.47  | 25694.84   | 174997.49  | 49550.38   | 172470.56  |
| 4990055.99 | 5669632.66 | 6553549.94 | 4335656.52 | 5134886.89 | 2382071.54 | 4001927.20 | 1328854.72 | 3982436.52 |
| 2490384.34 | 2796090.88 | 3280127.88 | 2151771.13 | 2560460.61 | 1673772.07 | 1993572.36 | 712180.31  | 1987457.77 |
| 16339.37   | 17789.64   | 20105.24   | 15222.83   | 17879      | 707.67     | 14041.67   | 4325.33    | 13695.67   |
| 4442       | 4712       | 6397.74    | 3275.33    | 4527.44    | 3341.83    | 3088.17    | 759.37     | 3154.36    |
| 142.50     | 12         | 13.38      | 14         | 33         | 0          | 0          | 11         | 22.62      |
| 5785.22    | 6621.50    | 6674.19    | 4874.18    | 5948.03    | 75422.46   | 4451.09    | 68373.24   | 4503.65    |
| 246814.44  | 260793.70  | 306582.96  | 210706.40  | 255089.94  | 185080.99  | 191480.54  | 96840.69   | 189451.19  |
| 0          | 0          | 0          | 0          | 0          | 0          | 0          | 0          | 0          |
| 131984.75  | 160410.64  | 184695.69  | 113863.67  | 135153.37  | 21500.17   | 105808.51  | 30386.97   | 106176.96  |
| 377929.62  | 415107.54  | 479426.29  | 315285.93  | 375641.02  | 162081.90  | 290078.37  | 83136.80   | 289061.32  |
| 135.10     | 21.64      | 22.20      | 23         | 55         | 2          | 8          | 13         | 33         |
| 12         | 0          | 5          | 0          | 0          | 0          | 0          | 0          | 0          |
| 12344.99   | 11484.92   | 16510.54   | 9183.34    | 12701.10   | 40459.80   | 8926.34    | 3869.90    | 8681.05    |



|            |            |            |            |            |            |            |           |            |
|------------|------------|------------|------------|------------|------------|------------|-----------|------------|
| 808140.50  | 921242.26  | 1062856.16 | 704184.85  | 840839.29  | 226474.11  | 654168.49  | 166025.43 | 648285.68  |
| 0          | 0          | 5          | 0          | 9          | 0          | 0          | 2         | 0          |
| 19972.92   | 21613.50   | 24815.06   | 17110.17   | 21557.40   | 4138.83    | 16197.50   | 3104.37   | 15751.86   |
| 0          | 0          | 5          | 0          | 9          | 0          | 0          | 2         | 0          |
| 96081.83   | 121422.64  | 136648.97  | 85050.75   | 98824.03   | 14155.83   | 78199.50   | 16960.91  | 78763.34   |
| 484824.47  | 537297.38  | 627890.47  | 420155.94  | 499948.53  | 289185.12  | 388926.99  | 133388.98 | 385995.49  |
| 971751.14  | 1099731.16 | 1277663.62 | 843417.67  | 996043.19  | 682012.68  | 778279.50  | 276632.20 | 775700.82  |
| 233802.67  | 258201.20  | 298445.37  | 201686.37  | 238278.69  | 106249.92  | 185226.16  | 63796.56  | 183655.73  |
| 1065322.05 | 1197029.10 | 1404778.44 | 924037.25  | 1100199.69 | 496865.22  | 853975.81  | 286350.04 | 851915.45  |
| 661044.79  | 734356.56  | 852494.80  | 573449.54  | 682623.90  | 343000.52  | 530806.49  | 175144.80 | 526636.91  |
| 154196.18  | 160786.06  | 192839.44  | 129988.77  | 156959.30  | 72412.89   | 119635.68  | 38783.35  | 119386.95  |
| 2062881.78 | 2323098.06 | 2687946.24 | 1782900.88 | 2108963.81 | 1055559.73 | 1644434.31 | 540022.79 | 1637701.74 |
| 0          | 0          | 0          | 0          | 0          | 0          | 0          | 0         | 0          |
| 85567.28   | 96979.42   | 111616.23  | 74058.93   | 87801.07   | 33666.64   | 68266.84   | 30946.76  | 68018.25   |
| 6518.50    | 6704.50    | 7429.34    | 4944       | 5898.25    | 12454.67   | 4458.50    | 967.37    | 4537.60    |
| 1626333.79 | 1832189.22 | 2137298.13 | 1399595.74 | 1660011.62 | 980072.87  | 1293030.64 | 476562.53 | 1287247.72 |
| 80936.31   | 93902.92   | 107553.77  | 71121.76   | 84162.23   | 20608.26   | 65284.33   | 23545.64  | 65327.59   |
| 575632.96  | 663310.24  | 768553.55  | 495365.46  | 588095.47  | 335967.12  | 458014.83  | 143372.26 | 458760.91  |
| 1422080.42 | 1587318.14 | 1844169.90 | 1238338.32 | 1469687.26 | 604313.03  | 1144425    | 409862.87 | 1134769.14 |
| 204047.36  | 214112.06  | 255105.69  | 167847.57  | 202278.04  | 109911.54  | 157232.16  | 50935.58  | 155625.47  |
| 20985.80   | 21937.42   | 24803.94   | 17459.66   | 20980.84   | 884        | 15855.66   | 2998      | 15159.34   |
| 431593.87  | 491905.62  | 561361.67  | 374357     | 445908.34  | 122092.40  | 347604.33  | 90380.56  | 344373.19  |
| 1698950.12 | 1891950.40 | 2208962.46 | 1466288.85 | 1736607.11 | 1392514.55 | 1352566.85 | 524714.53 | 1345629.13 |
| 948015.90  | 930860.98  | 1096213.92 | 812316.26  | 963977.78  | 171191.88  | 741744.72  | 264634.64 | 718183.23  |
| 10232.49   | 10621.28   | 11955.54   | 8626.34    | 10303.77   | 31466.63   | 7538.17    | 3443.45   | 7415.25    |
| 410347.82  | 487529.06  | 555564.27  | 363949.24  | 431060.11  | 37789.29   | 337126.83  | 75756.91  | 335236.87  |
| 245946.22  | 261613.92  | 304806.01  | 207649.90  | 249464.18  | 46551.30   | 194037.99  | 48719.48  | 191014.70  |
| 11073.18   | 11655.14   | 14167.29   | 9066.59    | 11656.63   | 29635.14   | 8405.67    | 3961.60   | 8360.56    |
| 678123.63  | 761358.22  | 887436.72  | 587390.90  | 698802.51  | 398307.11  | 543333     | 198589.69 | 539869.56  |
| 736280.89  | 820530.62  | 949730.99  | 629176.73  | 743719.09  | 306534.32  | 577615.21  | 137385.18 | 577618.13  |
| 336078.69  | 392890.06  | 443278.20  | 291992.73  | 346797.80  | 73021.30   | 270052.48  | 67048.84  | 266906.53  |
| 0          | 0          | 0          | 0          | 0          | 0          | 0          | 0         | 0          |
| 558554.96  | 657394.82  | 750325.14  | 495275.01  | 580942.50  | 140614.74  | 453656.49  | 141459.92 | 454192.74  |
| 57957.29   | 63878.06   | 78530.61   | 49007.26   | 59791.28   | 51152.80   | 45842.97   | 18426.48  | 46062.74   |

|            |            |            |            |            |            |            |           |            |
|------------|------------|------------|------------|------------|------------|------------|-----------|------------|
| 0          | 0          | 0          | 0          | 0          | 0          | 0          | 0         | 0          |
| 85837.58   | 98039.14   | 109780.23  | 75607.42   | 88851.16   | 12607.16   | 69146.84   | 15959.44  | 68076.08   |
| 40291.09   | 48779      | 54531.47   | 34768.50   | 41680.98   | 10621.17   | 32251.83   | 6697.03   | 31688.58   |
| 46049.93   | 52427.28   | 61476.04   | 41572      | 48796.75   | 5848.67    | 38598.50   | 10428.37  | 38174.61   |
| 112354.10  | 131564.14  | 151225.29  | 97147.31   | 116404.58  | 12421.30   | 90698.49   | 21286.24  | 90042.21   |
| 439517.19  | 492535.04  | 575789.91  | 376986.22  | 447380.88  | 195488.02  | 347874.66  | 123444.94 | 346538.64  |
| 99524.52   | 97149.28   | 114598.78  | 83493.51   | 99581.28   | 74687.52   | 76739.13   | 32841.60  | 74813.67   |
| 451118.91  | 504563.54  | 579625.77  | 398142.17  | 472334.39  | 155800.49  | 366914.96  | 108096.67 | 361476.85  |
| 980989.79  | 1094882.66 | 1271629.72 | 854206.99  | 1010195.09 | 591404.73  | 784351.48  | 312885.65 | 780081.64  |
| 26919.69   | 31139.14   | 37194.13   | 21766.42   | 26548.61   | 4132.50    | 20626.17   | 6174.70   | 20750.03   |
| 614676.50  | 669923.80  | 800085.88  | 523350.21  | 628437.58  | 536232.23  | 484492.69  | 220392.79 | 485028.36  |
| 384997.71  | 432216.32  | 509958.22  | 335345.56  | 397916.42  | 294813.72  | 309700.33  | 124616.68 | 308916.67  |
| 286370.59  | 329659.84  | 381417.85  | 248845.36  | 294911.48  | 149022.12  | 229770.34  | 71483.44  | 229693.43  |
| 96849.70   | 104156.20  | 119259.11  | 86708.93   | 101449.17  | 104018.98  | 79333.52   | 60688.24  | 77266.50   |
| 67389.76   | 79549.28   | 90114.23   | 60009.42   | 70272.56   | 9092.66    | 55011      | 14897.54  | 54763.49   |
| 84504.99   | 93679      | 110237.84  | 73248.66   | 86651.12   | 3115.84    | 67877.50   | 19329.36  | 67459.61   |
| 25656.42   | 24768.14   | 29709.37   | 21450.92   | 25934.19   | 20294.63   | 19866.99   | 8401.03   | 19332.97   |
| 46382.93   | 53710.64   | 60672.10   | 40835      | 48315.15   | 4821.83    | 37817.17   | 7958.37   | 37580.86   |
| 1235912.41 | 1389643.40 | 1623105.52 | 1075872.48 | 1279704.37 | 591562.76  | 992303.53  | 370217.94 | 987987.31  |
| 70692.50   | 71272.50   | 81088.52   | 61738.99   | 73261.51   | 2979       | 56973.99   | 11900     | 54906.51   |
| 590481.85  | 634076.66  | 732439.54  | 503063.67  | 596081.49  | 258928.48  | 462683.78  | 172104.28 | 456777.19  |
| 150579.34  | 169193.28  | 199036.59  | 131561.32  | 159588.63  | 15294.32   | 123208.32  | 26229.28  | 121470.28  |
| 1013532.19 | 1137807.04 | 1331192.56 | 871400.45  | 1037326.60 | 652569     | 806765.95  | 296296.18 | 803015.35  |
| 945404.40  | 1061129.22 | 1235325.38 | 816721.48  | 968382.08  | 432974.58  | 754363.33  | 255284.12 | 750394.80  |
| 7974.59    | 8514.64    | 9690.59    | 6999.34    | 8596.77    | 35880.83   | 6290.17    | 1747.37   | 6234.36    |
| 967        | 973        | 2410       | 527        | 1196       | 15         | 900        | 270       | 991.67     |
| 883923.82  | 981075.42  | 1143939.94 | 762454.62  | 908186.98  | 486323.82  | 705467.94  | 284257.14 | 699310.03  |
| 3530258.11 | 3787906.62 | 4380593.33 | 3032400.25 | 3592724.11 | 980891.52  | 2791016.60 | 842698    | 2753508.13 |
| 127439.84  | 121913.50  | 146935.55  | 103921.31  | 126853.85  | 5146       | 98242.65   | 21713     | 95248.85   |
| 156051.13  | 171774.34  | 198744.78  | 137187.67  | 162607.28  | 87123.24   | 126292.17  | 42077.24  | 123948.64  |
| 87512.15   | 97720.14   | 112089.03  | 75120.09   | 88198.04   | 37768.80   | 69074.16   | 23322.64  | 68453.56   |
| 35449.67   | 35063      | 49405.18   | 27992.33   | 38468.50   | 1683.35    | 29118.35   | 13765.65  | 28599.01   |
| 1850795.99 | 2094296.92 | 2422085.19 | 1603634.51 | 1893713.49 | 1100568.85 | 1478966.17 | 498837.17 | 1474033.52 |
| 67560.98   | 64255.56   | 74950.74   | 60329.78   | 69826.74   | 88176.23   | 53428.85   | 29521.91  | 51979.11   |

|            |            |            |            |            |           |            |           |            |
|------------|------------|------------|------------|------------|-----------|------------|-----------|------------|
| 1147406.51 | 1285610.48 | 1505293.59 | 988444.76  | 1172096.04 | 800247.54 | 914702.49  | 338438.10 | 910039.38  |
| 173811.64  | 195654.20  | 228038.60  | 150010.93  | 177713.94  | 127609.02 | 138735.67  | 52755.94  | 138060.92  |
| 37657.97   | 41688.50   | 45381.46   | 34574.44   | 40890.95   | 49246.45  | 30632.02   | 7974.55   | 31075.08   |
| 63440.35   | 74895.78   | 84437.02   | 54841.18   | 64298.66   | 56596.94  | 50228.83   | 24491.18  | 50098.78   |
| 56747.34   | 50641      | 65847.03   | 42182.32   | 53592.34   | 2167      | 41268.66   | 9813      | 40342.34   |
| 10322.34   | 10549      | 11358.84   | 8546.66    | 10036.33   | 454.67    | 7724.67    | 2967.33   | 7339.67    |
| 89586.01   | 97368.64   | 115436.36  | 77071.84   | 90761.55   | 62526.14  | 71065.33   | 27260.68  | 70664.17   |
| 670411.78  | 738258.82  | 861401.65  | 576903.05  | 683950.61  | 491553.31 | 532932.51  | 197124.45 | 528827.58  |
| 340358.26  | 380041.90  | 448274.55  | 285839.49  | 342053.43  | 144533.10 | 266658.64  | 86802.12  | 266019.37  |
| 1072017.41 | 1192882.88 | 1379326.79 | 928107.59  | 1106975.33 | 418801.36 | 859605.79  | 245916.22 | 849698.94  |
| 0          | 0          | 5          | 0          | 0          | 0         | 0          | 0         | 0          |
| 1355634.14 | 1530674.22 | 1755971.64 | 1177145.53 | 1393761.96 | 471801.73 | 1085873.17 | 265329.01 | 1080285.53 |
| 824.75     | 154.50     | 922.52     | 422.84     | 731.26     | 22206.33  | 120.67     | 222.41    | 422.75     |
| 26496      | 26253.50   | 36592.17   | 21684.50   | 28491      | 1228      | 21852      | 4964      | 21851      |
| 225362.72  | 248871.90  | 290024.56  | 196967.69  | 237417.38  | 113264.86 | 182768.97  | 64981.06  | 179694.72  |
| 0          | 0          | 0          | 0          | 0          | 0         | 0          | 0         | 0          |
| 0          | 0          | 0          | 0          | 0          | 0         | 0          | 0         | 0          |
| 26927.99   | 34128.12   | 37986.93   | 23858.51   | 28094.31   | 8893.85   | 21993.51   | 18552.97  | 21937.74   |
| 337100.67  | 388516.90  | 441130.86  | 302732.81  | 358942.72  | 33138.74  | 280308.13  | 79994.32  | 275586.67  |
| 114659.86  | 125195.28  | 140570.62  | 97374.24   | 115510.06  | 37252.33  | 89413.83   | 20619.57  | 87413.58   |
| 0          | 0          | 0          | 0          | 0          | 0         | 0          | 0         | 0          |
| 155571     | 171914.06  | 200338.27  | 133927.61  | 158631.34  | 79610.63  | 123249.48  | 56979.67  | 122318.43  |
| 0          | 0          | 0          | 0          | 0          | 0         | 0          | 0         | 0          |
| 119164.63  | 124282.70  | 146164.24  | 104325.76  | 125522.17  | 46975.98  | 95724.17   | 22369.46  | 93373.08   |
| 402987.78  | 442942.52  | 518335.15  | 351428.07  | 418091.27  | 232319.33 | 323940.99  | 134988.51 | 321195.40  |
| 152091.67  | 168755.14  | 194393.73  | 133685.26  | 157460.44  | 52408.79  | 122936.66  | 37677.35  | 121582.08  |
| 71208.07   | 82305.78   | 97918.43   | 60724.68   | 72676.19   | 58302.66  | 56338.64   | 25208.90  | 56544.56   |
| 44651.16   | 51296.64   | 59225.40   | 39149.92   | 45931.36   | 26370.83  | 36184.33   | 10919.41  | 36153.96   |
| 116956.57  | 134076.06  | 153770.73  | 103295.17  | 123885.28  | 46292.97  | 96242.50   | 28253.51  | 95422.70   |
| 839561.07  | 810134.48  | 981019.42  | 705983.35  | 843851.27  | 127839.57 | 653251.39  | 210254.37 | 637560.84  |
| 365824.12  | 405834.96  | 472899.12  | 315430.02  | 373907.04  | 283594.22 | 291338.15  | 111138.10 | 289006.21  |
| 516664.05  | 616340.20  | 693990.06  | 463825.55  | 543821.10  | 34883.49  | 427430.12  | 96321.51  | 424711.37  |
| 566183.10  | 631503.50  | 727820.28  | 487026.93  | 573471.87  | 219509.26 | 447599.01  | 97102.94  | 447687.69  |
| 773897.15  | 858361.72  | 1000480.65 | 665190.07  | 787010.31  | 602859.37 | 613081.50  | 234104.49 | 609760.41  |



|            |            |            |            |            |           |            |           |            |
|------------|------------|------------|------------|------------|-----------|------------|-----------|------------|
| 264148.59  | 303146.06  | 355191.48  | 227341.77  | 270878.73  | 146886.86 | 210682.84  | 60531.34  | 211287.53  |
| 352538.75  | 394811.26  | 462126.63  | 303280.69  | 360162.48  | 261401.09 | 280752.33  | 100789.23 | 279518.68  |
| 355930.02  | 386908.96  | 463860.43  | 297712.47  | 356806.35  | 469980.62 | 273703.91  | 280246.34 | 275433.23  |
| 122.86     | 48         | 60         | 56         | 143.74     | 0         | 0          | 44        | 84         |
| 186456.64  | 187834.62  | 226212.86  | 153232.95  | 185955.05  | 148327.39 | 142198.97  | 64681.13  | 140684     |
| 981890.13  | 1093880.32 | 1277894.14 | 845706.43  | 1007242.59 | 629632.79 | 780516.99  | 380528.61 | 778085.72  |
| 944366.92  | 1080086.98 | 1251565.61 | 811233.70  | 963112.78  | 681124.88 | 749607.88  | 276595.92 | 752165.53  |
| 487871.12  | 544712.74  | 628534.01  | 426124.06  | 506964.91  | 150392.57 | 393416.13  | 111674.11 | 388466.32  |
| 1313134.39 | 1495159.10 | 1689361.31 | 1122461.62 | 1336740.92 | 518947.28 | 1032709.98 | 281807.80 | 1022852.46 |
| 39259.66   | 41909.48   | 58594.98   | 30633.44   | 39907.18   | 82289.22  | 28809.84   | 18765.64  | 30840.51   |
| 132574.70  | 131165.26  | 164413.53  | 109748.07  | 135948.71  | 406164.54 | 98377.71   | 374081.82 | 103118.95  |
| 20263.49   | 22763.50   | 25797.94   | 17529.76   | 21459.27   | 42770.17  | 16231.50   | 7038.57   | 16186.98   |
| 0          | 0          | 5          | 0          | 0          | 0         | 0          | 0         | 0          |
| 1181963.24 | 1325788.76 | 1518869.57 | 1042172.44 | 1241014.03 | 147209.92 | 965999.89  | 253084.26 | 947571.48  |
| 173730.24  | 194880.76  | 226040.75  | 149487.68  | 176888.99  | 86167.22  | 138343.84  | 53875.52  | 137685.74  |
| 375872.91  | 455435.20  | 513351.88  | 340973.83  | 396709.33  | 57610.79  | 313278.33  | 87090.53  | 313185.94  |
| 0          | 0          | 0          | 0          | 0          | 0         | 0          | 0         | 0          |
| 0          | 0          | 0          | 0          | 0          | 0         | 0          | 0         | 0          |
| 1100742.48 | 1229605.18 | 1424111.75 | 963602.72  | 1145817.43 | 328482.47 | 892787.10  | 278185.25 | 880387.77  |
| 0          | 0          | 0          | 0          | 0          | 0         | 0          | 0         | 0          |
| 64861.16   | 68534.78   | 80989.22   | 55320.67   | 65637.67   | 22674.13  | 51051      | 16418.69  | 50256.10   |

| B19        | B2         | B20        | B3         | B4         | B5         | B6         | B7         | B8         |   |
|------------|------------|------------|------------|------------|------------|------------|------------|------------|---|
| 0          | 0          | 0          | 0          | 0          | 0          | 0          | 0          | 0          | 0 |
| 721680.58  | 1479574.87 | 758930.10  | 1728062.32 | 1602472.38 | 639481.56  | 1621084.61 | 1647589.61 | 1720910.12 |   |
| 2511161.14 | 5160830.28 | 2631105.82 | 5978945.47 | 5608603.56 | 2217858.56 | 5641950.84 | 5751991.92 | 5944607.17 |   |
| 501065.45  | 995294.39  | 520161.74  | 1176476.06 | 1117011.82 | 434686.93  | 1118456.54 | 1147856.58 | 1179195.01 |   |
| 53052.45   | 113732.78  | 55127.04   | 129619.79  | 124778.84  | 46314.33   | 124212     | 123472.76  | 126270.33  |   |
| 35527.76   | 64614.25   | 36458.02   | 80141.06   | 75368.87   | 32199.33   | 76061      | 81788.08   | 80567.83   |   |
| 148716.79  | 291334.21  | 152390.49  | 344571.15  | 332101.37  | 132449.13  | 327429.02  | 337303.03  | 351505.98  |   |
| 0          | 0          | 0          | 0          | 0          | 0          | 0          | 0          | 0          | 0 |
| 4172567.10 | 9770573.88 | 4366611.25 | 9902966.33 | 9176574.29 | 3628529.37 | 8997284.29 | 9235146.83 | 9457782.95 |   |
| 40884.82   | 76072.10   | 41052.30   | 90852.04   | 90098.58   | 34190.81   | 86812.51   | 92201.67   | 93888.70   |   |
| 284591.73  | 502498.92  | 290844.27  | 664182.10  | 637779.95  | 249555.97  | 641141.24  | 662025.30  | 675988.49  |   |
| 796186.15  | 1591664.81 | 833605.02  | 1893797.21 | 1784491.12 | 696623.58  | 1797710.43 | 1826407.87 | 1886491.70 |   |
| 41208.68   | 80926.34   | 44803.02   | 96427.02   | 84623.66   | 32028      | 88740.32   | 92710      | 99160.32   |   |
| 19980.37   | 57465.36   | 22444.19   | 57143.75   | 50167.38   | 19342.50   | 50245.49   | 46211.74   | 55334.84   |   |
| 49         | 77         | 23         | 68.50      | 252.33     | 214        | 99         | 515        | 205        |   |
| 35527.76   | 64594.65   | 36434.02   | 80141.06   | 75359.87   | 32199.33   | 76061      | 81788.08   | 80562.83   |   |
| 240971.16  | 470940.77  | 241680.42  | 551199.55  | 526097.35  | 210150.36  | 510754.04  | 541827.03  | 583717.98  |   |
| 225355.47  | 431260.41  | 230277.94  | 512703.08  | 492235.51  | 195563.11  | 484215.62  | 507505.46  | 519804.99  |   |
| 326297.70  | 604097.56  | 332964.09  | 768674.25  | 740473.77  | 287448.15  | 742802.55  | 749917.47  | 767817.39  |   |
| 69         | 384.70     | 24.53      | 137.90     | 565.19     | 527.34     | 164.87     | 398.91     | 225.36     |   |
| 367601.65  | 721548.78  | 376118.45  | 861093.69  | 830593.57  | 312290.61  | 825977.63  | 833607.71  | 856600.67  |   |
| 0          | 0          | 0          | 0          | 0          | 0          | 0          | 0          | 0          | 0 |
| 425011.17  | 856813.04  | 446784.43  | 1016465.79 | 951765.74  | 376062.78  | 961204.52  | 978299.48  | 1017457.82 |   |
| 1627151.24 | 2961797.48 | 1659469.50 | 3706163.44 | 3611171.70 | 1431027.42 | 3601833.84 | 3760327.73 | 3742190.05 |   |
| 93648.40   | 181259.72  | 97228.22   | 221941.03  | 215462.90  | 82751.83   | 216539.53  | 217842.84  | 219599.70  |   |
| 0          | 4          | 0          | 0          | 0          | 0          | 0          | 0          | 0          | 0 |
| 283222.31  | 597787.64  | 298079.28  | 682007.62  | 641862.70  | 248096.47  | 643379.76  | 648386.30  | 674608.60  |   |
| 142646.12  | 290496.48  | 148737.38  | 340089.47  | 319056.02  | 126784.31  | 319452.50  | 326190.13  | 333987.73  |   |
| 148166.49  | 256225.79  | 146450.26  | 323228.09  | 309794.82  | 137074.64  | 304924.82  | 335838.06  | 330380.85  |   |
| 495560.19  | 1019970.96 | 522606.10  | 1205476.96 | 1123432.23 | 437534.30  | 1135481.01 | 1136783.50 | 1189670.80 |   |
| 637800.49  | 1290217.86 | 669843.27  | 1545813.61 | 1473154.27 | 547754.14  | 1487078.19 | 1482819.81 | 1518877.61 |   |
| 0          | 0          | 0          | 0          | 0          | 0          | 0          | 0          | 0          | 0 |
| 21331      | 30182.17   | 21294      | 48347      | 48169.16   | 19202      | 48914      | 50266.34   | 51516.67   |   |

|            |            |            |            |            |            |            |            |            |
|------------|------------|------------|------------|------------|------------|------------|------------|------------|
| 517467.16  | 1158635.77 | 548856.71  | 1296543.23 | 1194931.20 | 447648.49  | 1203338.30 | 1176756.73 | 1240558.41 |
| 0          | 0          | 0          | 0          | 0          | 0          | 0          | 0          | 0          |
| 4312       | 8027.20    | 4222.83    | 8842.60    | 7606.47    | 4596.67    | 7807.80    | 10896.34   | 10158.94   |
| 5631.67    | 7790.67    | 5774       | 10858      | 10416.83   | 4560.67    | 10458.33   | 12255.50   | 12769.54   |
| 55145.53   | 95162.10   | 56783.48   | 120924.64  | 111790.86  | 46019.97   | 113255.75  | 120015.56  | 123064.80  |
| 17464.41   | 31982.11   | 16428.11   | 37395.44   | 34827.71   | 16786.31   | 33145.76   | 41383.32   | 42872.16   |
| 10040.99   | 41717.07   | 12679.17   | 36666.50   | 32407.87   | 8515.83    | 31883.50   | 24032.17   | 32697.76   |
| 1519491.85 | 3120519.45 | 1599193.27 | 3655255.59 | 3378821.74 | 1353346.14 | 3415007.21 | 3467206.57 | 3655767.61 |
| 1487974.89 | 3052851.63 | 1555171.50 | 3529595.18 | 3291437.23 | 1331822.15 | 3302987.81 | 3407244.41 | 3526780.92 |
| 0          | 0          | 0          | 0          | 0          | 0          | 0          | 0          | 0          |
| 1871.37    | 2799.11    | 1147.29    | 2400.10    | 4325.76    | 1301.32    | 1601.65    | 3323.13    | 3270.63    |
| 1287       | 1008       | 640        | 1659       | 3837       | 268        | 2164       | 1736       | 1622       |
| 41208.68   | 80926.34   | 44803.02   | 96427.02   | 84623.66   | 32028      | 88740.32   | 92710      | 99160.32   |
| 0          | 0          | 0          | 0          | 0          | 0          | 0          | 0          | 0          |
| 309851.95  | 598422.69  | 321833.19  | 733397.20  | 679824.35  | 280855.78  | 686679.64  | 717129.39  | 739988.84  |
| 169334.89  | 332329.41  | 177493.26  | 401819.85  | 378728.06  | 148236.15  | 383022.82  | 388888.04  | 403189.32  |
| 193110.56  | 393462     | 201941.43  | 458164.75  | 433115.22  | 164830.99  | 434487.15  | 437371.44  | 458771.26  |
| 146712.63  | 303028.31  | 152939.53  | 353536.10  | 337769.72  | 125425.65  | 338414.07  | 335498.63  | 347661.64  |
| 0          | 0          | 0          | 3          | 115        | 0          | 0          | 0          | 0          |
| 35608.76   | 64851.65   | 36631.02   | 80211.06   | 76136.87   | 32229.33   | 76177      | 81821.08   | 82375.83   |
| 12         | 80.33      | 18.17      | 66.51      | 98.67      | 121        | 57         | 187.50     | 33.66      |
| 0          | 24         | 0          | 312        | 0          | 0          | 0          | 0          | 0          |
| 221012.28  | 437946.08  | 230487.50  | 525588.58  | 497537.18  | 193893.14  | 500116.34  | 509802.45  | 520681.89  |
| 1277127.46 | 2541890.89 | 1338482.27 | 3008201.53 | 2811406.70 | 1131735.01 | 2845300.74 | 2937691.94 | 2998292.91 |
| 44849.17   | 86712.45   | 47743.20   | 104598.05  | 95098.38   | 40964.16   | 97403.49   | 101676.28  | 107303.36  |
| 616808.74  | 1257222.18 | 646883.74  | 1480543.60 | 1383109.81 | 536720.43  | 1393132.98 | 1417176.74 | 1471571.09 |
| 50889.15   | 110403.21  | 53803.36   | 131409.96  | 119661.55  | 46048.32   | 121876.89  | 117045.52  | 134308.86  |
| 433217.59  | 827629.81  | 450402.03  | 1015823.19 | 962828.56  | 382718.29  | 970596.82  | 995372.50  | 1023134.12 |
| 5926.02    | 12399.48   | 6058.85    | 15018.64   | 13362.60   | 5500.83    | 13327.37   | 13715.84   | 15748.10   |
| 411796.10  | 770605.29  | 428918.60  | 956370.24  | 892706.19  | 371127.63  | 908810.64  | 945607.09  | 966154.36  |
| 109372.80  | 209265.16  | 115240.56  | 253712.90  | 233107.96  | 92639.83   | 238464.02  | 249905.26  | 256519.18  |
| 2528.07    | 6148.17    | 2407       | 7034.92    | 7526.39    | 1969.16    | 6201.11    | 6343.09    | 7565.93    |
| 115543.67  | 216465.49  | 118998.61  | 266711.57  | 251485.47  | 101240.66  | 252864.45  | 262738.08  | 268466.54  |
| 41208.68   | 80926.34   | 44803.02   | 96427.02   | 84623.66   | 32028      | 88740.32   | 92710      | 99160.32   |

|            |            |            |            |            |            |            |            |            |
|------------|------------|------------|------------|------------|------------|------------|------------|------------|
| 0          | 0          | 27         | 3          | 115        | 0          | 0          | 0          | 0          |
| 245876.77  | 507452.80  | 257826.08  | 587373.55  | 550580.39  | 211661.30  | 552805.78  | 560801.17  | 585176.79  |
| 501851.40  | 1011583.03 | 525117.35  | 1191512.51 | 1117641.77 | 438602.95  | 1126538.95 | 1150249.90 | 1193401.51 |
| 93021.39   | 139651.92  | 91291.09   | 199091.71  | 194901.55  | 86800.13   | 192649.81  | 213972.86  | 208792.74  |
| 21799.76   | 37016.19   | 22019.35   | 48977.59   | 42729.73   | 21309.33   | 43197      | 47829.14   | 52250.50   |
| 20420.79   | 50420.65   | 21574.54   | 50021.57   | 45428.02   | 17566.16   | 44159.65   | 43914.48   | 48141.96   |
| 125222.37  | 343314.97  | 134038.05  | 324970.27  | 291569.41  | 107679.80  | 285318.70  | 272886.04  | 293023.15  |
| 67918.47   | 131910.64  | 71667.03   | 158038.01  | 144577.36  | 55096.83   | 148370.82  | 153833.81  | 158332.87  |
| 0          | 0          | 0          | 0          | 0          | 0          | 0          | 0          | 0          |
| 0          | 0          | 0          | 0          | 0          | 0          | 0          | 0          | 0          |
| 896177.88  | 1919808    | 945537.94  | 2191192.27 | 2036624.24 | 774994.91  | 2051378.35 | 2047162.93 | 2134112.48 |
| 107341.04  | 202646.58  | 107288.78  | 244481.25  | 238800.95  | 90844.66   | 235114.93  | 244101.43  | 240036.08  |
| 144461.44  | 307403.28  | 156405.14  | 349781.58  | 311991.89  | 123873.33  | 322037.55  | 329255.06  | 348149.10  |
| 404607.32  | 808874.62  | 418066.48  | 950610.90  | 908813.96  | 346579.75  | 904224.64  | 924192.45  | 954453.13  |
| 110235.29  | 199189.13  | 119446.75  | 251111.37  | 223063.55  | 102125.98  | 234460.27  | 255597.79  | 269063.42  |
| 855175.22  | 1898529.34 | 902921.16  | 2081396.92 | 1923717.80 | 732252.28  | 1929128.36 | 1932324.95 | 1996946.70 |
| 2419788.85 | 4622284.22 | 2538813.35 | 5713544.27 | 5273976.41 | 2195613.83 | 5386113.75 | 5604298.78 | 5785572.19 |
| 60496.81   | 118894.14  | 62748.72   | 137891.52  | 132301.91  | 52403.48   | 131999.42  | 138189.10  | 138488.67  |
| 827226.89  | 1667827.85 | 846335.21  | 1923433.39 | 1846913.23 | 706416.21  | 1828534.40 | 1855683.70 | 1900737.49 |
| 281730.09  | 622238.37  | 294942.33  | 688028.38  | 643130.26  | 250799.82  | 643871.20  | 644777.06  | 662383.84  |
| 73617.39   | 138339.82  | 76452.20   | 173073.32  | 168023.62  | 67096      | 168826.73  | 173977.80  | 175884.58  |
| 33295.16   | 66742.59   | 34845.85   | 78866.66   | 74494.70   | 29197.33   | 75031      | 76404.88   | 79202.04   |
| 717981.97  | 1316341.18 | 735453.27  | 1660429.89 | 1603148.52 | 623716.92  | 1608798.41 | 1651560.07 | 1679411.15 |
| 1136       | 2154       | 1208       | 2313       | 1899       | 1304       | 1997       | 1768       | 2693       |
| 0          | 0          | 27         | 3          | 115        | 0          | 0          | 0          | 0          |
| 2715412.90 | 6597081.54 | 2852947.92 | 6531102.04 | 6047022.92 | 2333936.13 | 5917034.25 | 5959040.22 | 6081506.07 |
| 135612.05  | 216790.85  | 135723.52  | 307269.69  | 312842.02  | 116555.83  | 312127.26  | 319532.72  | 314590.77  |
| 1399.50    | 1080.67    | 692.41     | 1737.33    | 3396.97    | 268        | 2139.87    | 1866.07    | 1776.64    |
| 32636.36   | 63744.17   | 34003.52   | 77141.82   | 73009.43   | 28412.50   | 73662.70   | 75407.18   | 76796.03   |
| 383297.57  | 854487.50  | 409061.99  | 966267.02  | 893391.07  | 327770     | 902490.86  | 872879.44  | 929433.37  |
| 2211       | 4601.23    | 2409       | 5673.95    | 4653.85    | 2626.48    | 5719.10    | 3006       | 6873.50    |
| 1809094.78 | 3609203.71 | 1890762.19 | 4281234.11 | 4050529.48 | 1585891.66 | 4077619.98 | 4150478.63 | 4299187.59 |
| 0          | 0          | 0          | 0          | 0          | 0          | 0          | 0          | 0          |
| 86778.26   | 195405.12  | 91642.29   | 208523.01  | 194537.02  | 75344.31   | 191915.87  | 195515.30  | 201497.82  |



|            |            |            |            |            |            |            |            |            |
|------------|------------|------------|------------|------------|------------|------------|------------|------------|
| 538065.95  | 1070384.01 | 562856.47  | 1275148.46 | 1203649.08 | 472177.12  | 1212982.63 | 1235014.66 | 1278894.56 |
| 5645       | 10548      | 5979       | 15276      | 12944.83   | 5464       | 13702      | 13548      | 15618.50   |
| 875088.20  | 1776191.93 | 919465.45  | 2079130    | 1944862.83 | 770427.37  | 1962806.17 | 2010182.29 | 2084848.37 |
| 12         | 80.33      | 18.17      | 69.51      | 295.50     | 121        | 57         | 187.50     | 33.66      |
| 0          | 0          | 0          | 0          | 0          | 0          | 0          | 0          | 0          |
| 305540.11  | 604121.37  | 315045.66  | 719250.89  | 690038.71  | 261485.80  | 688080.03  | 693803.52  | 719792.78  |
| 0          | 0          | 0          | 0          | 0          | 0          | 0          | 0          | 0          |
| 7051       | 16413.20   | 7540.83    | 18133.60   | 15431.97   | 7036.67    | 16092.80   | 17484.84   | 19704.94   |
| 41208.68   | 80926.34   | 44803.02   | 96427.02   | 84623.66   | 32028      | 88740.32   | 92710      | 99160.32   |
| 74993.75   | 169643.65  | 78832.09   | 188906.50  | 168144.56  | 67334.33   | 169581.27  | 166940.72  | 177493.52  |
| 0          | 65         | 34         | 4          | 0          | 0          | 2          | 40         | 63.50      |
| 5400.80    | 7906.54    | 5367       | 11364.80   | 9780.70    | 6027       | 10027      | 12270.80   | 12881.60   |
| 209352     | 409498.67  | 217677.33  | 496289.71  | 475318.14  | 183425.51  | 477135.65  | 483901.92  | 495977.01  |
| 953771.50  | 1879217.90 | 1001683.05 | 2248796.67 | 2103646.83 | 833700.57  | 2131621.50 | 2186918.52 | 2255455.11 |
| 804474.77  | 1625482.70 | 846753.71  | 1890533.51 | 1764085.52 | 697315.50  | 1780365.78 | 1839292.73 | 1891006.33 |
| 1399124.24 | 2837405.34 | 1463455.10 | 3323375.03 | 3110260.76 | 1231414.23 | 3134025.63 | 3190135.06 | 3292206.58 |
| 24568.69   | 36871.40   | 24181.31   | 56757.32   | 57632.53   | 21207.83   | 57170.37   | 56577.25   | 60444.83   |
| 614744.11  | 1203164.21 | 640539.73  | 1434104.60 | 1352879.69 | 541845.89  | 1357593    | 1402367.06 | 1492344.09 |
| 786621.78  | 1658598.87 | 848281.07  | 1895218.72 | 1720355.01 | 686029.76  | 1759599.24 | 1803310.48 | 1887849.86 |
| 168802.82  | 301371.52  | 176985.17  | 388329.48  | 376894.11  | 146276.18  | 386016.59  | 396887.46  | 397132.45  |
| 163202.59  | 352185.64  | 172180.82  | 406993.61  | 385066.03  | 140083.17  | 385476.36  | 374168.98  | 393819.90  |
| 3858743.39 | 7561271.31 | 4005741.71 | 9079809.75 | 8598192.58 | 3398227.82 | 8643433.66 | 8872319.89 | 9090799.89 |
| 1927610.73 | 3863986.90 | 1998760.96 | 4532479.85 | 4307025.75 | 1677013.46 | 4304289.13 | 4388475    | 4520495.17 |
| 13159.67   | 35884.37   | 13951      | 33037.50   | 28614.11   | 11847.67   | 28105.33   | 28058      | 28203.87   |
| 3925.03    | 5548.91    | 3337.02    | 7331.30    | 7837.59    | 2700.83    | 6395.03    | 6152.34    | 6728.20    |
| 8.50       | 50.50      | 0          | 3          | 64.62      | 96         | 23.62      | 6          | 2.50       |
| 4941.67    | 12530.30   | 4729.89    | 9346.71    | 8210.48    | 7212.11    | 8120.81    | 10725.98   | 10867.78   |
| 183439.80  | 423611.04  | 192580.93  | 457788.42  | 424410.35  | 163630.72  | 416386.27  | 416314.03  | 451497.73  |
| 0          | 0          | 0          | 0          | 0          | 0          | 0          | 0          | 0          |
| 102819.08  | 161154.98  | 103707.38  | 233982.68  | 236499.01  | 87903.50   | 237763.03  | 244316     | 244633.12  |
| 287333.17  | 517530.69  | 298946.26  | 654299.37  | 615391.32  | 253539.63  | 623033.66  | 660073.97  | 674826.92  |
| 16         | 146        | 156.50     | 28         | 234        | 96         | 42         | 550        | 189        |
| 0          | 0          | 27         | 3          | 115        | 0          | 0          | 0          | 0          |
| 9084.78    | 24652.96   | 8767.09    | 22706.06   | 24976.60   | 6898.64    | 21675.49   | 22178.05   | 27193.90   |

|            |            |            |            |            |            |            |            |            |
|------------|------------|------------|------------|------------|------------|------------|------------|------------|
| 628703.53  | 1231237.95 | 649250.57  | 1491880.66 | 1406836.36 | 546924.12  | 1414342.96 | 1430238.01 | 1476204.09 |
| 0          | 19         | 0          | 3          | 121        | 0          | 10         | 0          | 28         |
| 14515.69   | 27772.90   | 14807.14   | 38911.31   | 35416.36   | 12818.83   | 35632.37   | 33295.41   | 40122      |
| 0          | 19         | 0          | 3          | 121        | 0          | 10         | 0          | 28         |
| 77152.26   | 117189.32  | 77732.61   | 169882.98  | 170205.53  | 68435.83   | 172180.63  | 181941.71  | 177260.11  |
| 372822.72  | 780952.10  | 390447.99  | 891327.95  | 831919.33  | 327689.97  | 833896.78  | 848366.95  | 881261.85  |
| 749297.57  | 1481736.97 | 782515.73  | 1761788.63 | 1668328.28 | 660613.41  | 1678700    | 1722358.69 | 1771316.11 |
| 180449.83  | 364477.72  | 188249.31  | 421853.57  | 387620.38  | 161749.47  | 391610.55  | 406022.38  | 418502.72  |
| 824375.25  | 1666426.20 | 856378.06  | 1952469.86 | 1851228.05 | 717252.09  | 1846042.38 | 1877438.34 | 1932793.87 |
| 507749.07  | 1051731.26 | 528991.12  | 1216860.89 | 1135034.91 | 447087.13  | 1137929.01 | 1158760.61 | 1198198.64 |
| 115713.91  | 246294.49  | 120312.72  | 277256.53  | 260806.90  | 104398.98  | 256692.62  | 260678.92  | 276173.28  |
| 1587270.33 | 3103218.42 | 1657659.97 | 3731178.74 | 3501551.32 | 1404250.45 | 3538712.05 | 3654029.21 | 3743987.23 |
| 0          | 21         | 0          | 0          | 0          | 0          | 0          | 3          | 0          |
| 65834.41   | 130534.29  | 68559.04   | 155277.12  | 147537.89  | 57750.83   | 147928.77  | 150788.10  | 155549.21  |
| 4634.40    | 6828.15    | 4638.50    | 9781.15    | 8613.22    | 4965.83    | 8564.50    | 11066.40   | 10835.47   |
| 1249813.52 | 2434754.75 | 1299494.93 | 2931465.52 | 2786188.22 | 1095669.51 | 2800440.04 | 2865447    | 2957454.99 |
| 63986.07   | 126009.24  | 65655.44   | 147211.55  | 141434.05  | 57193.32   | 140297.75  | 145994.60  | 147093.08  |
| 448135.80  | 814773.62  | 458698.24  | 1030817.70 | 994133.79  | 392532.44  | 995081.49  | 1031169.60 | 1050320.05 |
| 1090225.18 | 2311292.18 | 1144691.29 | 2628223.20 | 2462170.13 | 952090.27  | 2470718.43 | 2486982.74 | 2579258.36 |
| 153600.83  | 298635.48  | 162333.69  | 358774.98  | 330380.74  | 132636.48  | 336745.39  | 351647.11  | 365824.76  |
| 14759.34   | 27327.50   | 15745.68   | 37535.52   | 32539.16   | 15206      | 33492.66   | 34623      | 39952.32   |
| 333846.52  | 659480.33  | 349351.95  | 795625.22  | 737673.40  | 287914.66  | 748677.24  | 768183.06  | 782634.15  |
| 1301324.08 | 2659539.54 | 1365208.14 | 3086128.43 | 2895754.23 | 1145192.35 | 2911257.26 | 2972957.58 | 3084378.81 |
| 694643.21  | 1771530.01 | 762757.52  | 1767570.69 | 1498788.36 | 635853.95  | 1535611.60 | 1527139.88 | 1675685.30 |
| 7589.92    | 18285.67   | 7945.09    | 18092.50   | 16341.19   | 7321.82    | 16101.39   | 18024.04   | 20872.90   |
| 323129.03  | 597222.56  | 330139.25  | 759565.24  | 730421.27  | 285160.15  | 733735.22  | 743730.97  | 758813.53  |
| 186435.90  | 380523.61  | 198477.32  | 447092.22  | 401338.92  | 161856.33  | 412773.88  | 425017.84  | 442468.64  |
| 8830.38    | 15861.11   | 8316.53    | 19381.65   | 19533.48   | 7927.33    | 17930.49   | 19836.72   | 21875.37   |
| 524857.20  | 1048023.78 | 542369.26  | 1237239.84 | 1170162.15 | 459667.95  | 1170614.91 | 1198074.96 | 1229512    |
| 569134.38  | 1063188.37 | 590880.72  | 1298692.44 | 1228568.51 | 504366.38  | 1238839.21 | 1306386.62 | 1315898.13 |
| 255404.34  | 497819.62  | 270093.75  | 622890.36  | 583517.94  | 219356.49  | 596149.05  | 594885.61  | 619023.71  |
| 0          | 0          | 0          | 0          | 0          | 0          | 0          | 0          | 0          |
| 437150.13  | 848627.93  | 450220.64  | 1023218.02 | 987074.92  | 386823.45  | 984893.15  | 1011073.94 | 1014657.80 |
| 45421.85   | 85425.51   | 45446.06   | 104673.90  | 103197.79  | 39224.66   | 99576.29   | 101834.22  | 105487.28  |

|            |            |            |            |            |            |            |            |            |
|------------|------------|------------|------------|------------|------------|------------|------------|------------|
| 0          | 0          | 0          | 0          | 0          | 0          | 0          | 0          | 0          |
| 65048.41   | 132310.99  | 69632.55   | 159250.25  | 146388.37  | 57233.16   | 150045.77  | 151682.70  | 157295.43  |
| 31707.86   | 47797.10   | 31606.57   | 72228.19   | 70143.41   | 28434.16   | 70227.08   | 71424.78   | 75441.26   |
| 36661.40   | 82146.72   | 38272.84   | 86838.33   | 81955.01   | 32021.17   | 81613.83   | 82213.54   | 82092.03   |
| 86752.05   | 164447.90  | 88525.13   | 206641.34  | 200331.84  | 74162.50   | 199457.51  | 201340.23  | 203718.42  |
| 336105.40  | 655080.77  | 351145.66  | 789914.16  | 754513.96  | 290991.94  | 759025.39  | 773629.56  | 794398.31  |
| 73444.31   | 188698.78  | 80585.74   | 182413.42  | 156503.34  | 66812.14   | 157777.09  | 163318.36  | 174368.14  |
| 341213.86  | 767995.32  | 367259.46  | 859311.35  | 790677.34  | 295123.31  | 800848.44  | 786553.39  | 826049.38  |
| 753247.40  | 1558790.35 | 789320.96  | 1794813.82 | 1676150.99 | 665624.36  | 1684353.14 | 1720776.61 | 1780487.34 |
| 20561.69   | 28376.94   | 20533.18   | 45147.81   | 47487.14   | 16793.50   | 47125.37   | 48306.18   | 49728      |
| 474290.35  | 969916.20  | 484936.44  | 1106189.34 | 1058362.44 | 413170.22  | 1039380.48 | 1071928.59 | 1104137.88 |
| 296782.23  | 616557.51  | 309232.25  | 706808.97  | 673697.91  | 255727.28  | 672630.33  | 676902.78  | 698899.50  |
| 223907.62  | 416506.11  | 228498.52  | 514655.39  | 495302.96  | 198206.97  | 494793.94  | 514122.92  | 518546.43  |
| 72696.43   | 187229.38  | 79908.42   | 186411.49  | 164795.50  | 68018.22   | 166768.22  | 165063.82  | 178509.10  |
| 52257.02   | 108616.29  | 54888.48   | 125861.31  | 119740.29  | 44731.99   | 120570.40  | 120104.69  | 122068.76  |
| 65874.70   | 139043.52  | 69390.60   | 154365.50  | 145458.84  | 56183.84   | 146269.60  | 148462.68  | 149217.52  |
| 18611.76   | 49101.28   | 20628.36   | 47886.61   | 41083.61   | 16409.66   | 41456.25   | 41990.14   | 45738.05   |
| 36417.36   | 68289.07   | 37639.35   | 85155.90   | 79619.14   | 32096.83   | 80826.25   | 84114.68   | 84975.87   |
| 954840.29  | 1957669.97 | 991725.13  | 2273645.07 | 2149792.59 | 837168.90  | 2143471.40 | 2180794.66 | 2240219.29 |
| 51794.01   | 136220     | 58385.52   | 136743.03  | 113758     | 46982      | 118634.99  | 116508.50  | 127476.98  |
| 446790.18  | 920120.85  | 474630.78  | 1059892.96 | 962435.16  | 401643.42  | 981475.94  | 1025051.94 | 1061624.50 |
| 115129.42  | 247927.06  | 120532.72  | 288504.48  | 273278.53  | 95097.32   | 272376.25  | 261676.62  | 278569.86  |
| 776365.84  | 1533668.84 | 808000.47  | 1838586.46 | 1747343.59 | 674793.57  | 1753075.19 | 1784346.41 | 1847020.31 |
| 725406.09  | 1448291.10 | 759579.12  | 1717613.35 | 1615550.86 | 635649.24  | 1627288.12 | 1671735.22 | 1715537.93 |
| 5934.02    | 12893.88   | 6112.85    | 15092.24   | 13500.03   | 5515.49    | 13377.17   | 13954.84   | 15930.60   |
| 1252       | 938        | 570        | 1602       | 3106       | 268        | 2119       | 1728       | 1565       |
| 675386.36  | 1374913.21 | 706495.26  | 1614544.03 | 1520503.42 | 589923.93  | 1527917.76 | 1557429.76 | 1616710.38 |
| 2695998.39 | 5725666.86 | 2855299.34 | 6411627.89 | 5789979.30 | 2407162.88 | 5886128.44 | 6103008.22 | 6294875.45 |
| 93010.69   | 217146.34  | 103188.54  | 233174.05  | 198381.66  | 79010      | 207377.31  | 209223.50  | 226640.30  |
| 116326.77  | 271161.59  | 125619.64  | 295827.67  | 273411.17  | 102056.16  | 275366.30  | 266409.22  | 286287.79  |
| 66993.32   | 129644.19  | 71101.64   | 155899.88  | 144948.79  | 59704.16   | 148078.95  | 155014.26  | 158321.23  |
| 27415.67   | 64382.17   | 26079.32   | 70396      | 71854.83   | 17136.35   | 66918.33   | 54632      | 65424.05   |
| 1429917.83 | 2788526.12 | 1491325.68 | 3346308.24 | 3151643.50 | 1263878.66 | 3181483.70 | 3287674.60 | 3364432.24 |
| 49828.87   | 146663.87  | 57022.63   | 128684.70  | 107317.65  | 46171.48   | 108616.04  | 110005.69  | 119537.48  |

|            |            |            |            |            |           |            |            |            |
|------------|------------|------------|------------|------------|-----------|------------|------------|------------|
| 879370.88  | 1765358.40 | 918170.98  | 2079955.86 | 1968289.22 | 768249.07 | 1978986.25 | 2012845.23 | 2084959.83 |
| 133194.64  | 267234.51  | 139364.23  | 315446.34  | 297831.48  | 116860.99 | 300148     | 305413.92  | 316790.70  |
| 30577.87   | 60747.72   | 30694.30   | 70705.38   | 62697.86   | 29238.65  | 60526.97   | 69487.59   | 68774.46   |
| 48904.95   | 89093.72   | 50641.15   | 112840.20  | 108208.06  | 43146.83  | 109724.04  | 114892.72  | 114981.27  |
| 41208.68   | 80926.34   | 44803.02   | 96427.02   | 84623.66   | 32028     | 88740.32   | 92710      | 99160.32   |
| 7007.34    | 13417.01   | 7498.51    | 17574.67   | 16059.14   | 8076.67   | 16150.99   | 17682      | 19366      |
| 68674.52   | 148187.04  | 73874.40   | 162973.50  | 149573.19  | 58457.33  | 152646.24  | 155070.29  | 158541.37  |
| 510744.70  | 1055469.18 | 539114.97  | 1218623.07 | 1132953.57 | 450410.77 | 1144008.36 | 1168747.91 | 1216842.91 |
| 260047     | 467807.10  | 269753.67  | 602755.34  | 574972.80  | 225674.30 | 581452.82  | 602651.14  | 619513.02  |
| 817763.65  | 1703960.92 | 860015.91  | 1983970.82 | 1843328.69 | 711445.09 | 1855613.35 | 1869445.62 | 1946701.54 |
| 0          | 0          | 0          | 3          | 115        | 0         | 0          | 0          | 0          |
| 1053632.16 | 1999446.33 | 1091613.66 | 2451080.28 | 2294604.04 | 939728.66 | 2318905.24 | 2422921.36 | 2460694.77 |
| 707.58     | 607.24     | 397.43     | 433.91     | 1212.85    | 612.66    | 249.49     | 1191.38    | 960.23     |
| 21942      | 47190      | 20964.50   | 50131      | 51080.66   | 16649     | 46713      | 46072.50   | 46341      |
| 172847.81  | 384919.31  | 180000.35  | 428583.87  | 395714.56  | 150849.64 | 394277.04  | 390247.91  | 415897.15  |
| 0          | 0          | 0          | 0          | 0          | 0         | 0          | 0          | 0          |
| 0          | 0          | 0          | 0          | 0          | 0         | 0          | 0          | 0          |
| 21518.19   | 31270.91   | 21444.38   | 48030.71   | 48474.85   | 19728.18  | 48593.35   | 50832.78   | 51757.35   |
| 258541.86  | 586777.03  | 275059.68  | 654934.88  | 603403.42  | 222177.17 | 610436.72  | 589548.12  | 620643.62  |
| 84584.43   | 187422.04  | 93405.65   | 211570.43  | 185909.67  | 72619.16  | 193487.35  | 193866.99  | 205486.18  |
| 0          | 0          | 0          | 0          | 0          | 0         | 0          | 0          | 0          |
| 118845.30  | 242285.22  | 124896.25  | 282136.66  | 261740.50  | 105023.48 | 263741.28  | 272255.55  | 280292.39  |
| 0          | 0          | 0          | 0          | 0          | 0         | 0          | 0          | 0          |
| 89714.07   | 215338.42  | 95946.28   | 226810.89  | 206549.03  | 78844.81  | 205215.27  | 203253.24  | 219956.77  |
| 308612.24  | 675131.18  | 323221.92  | 748020.77  | 697094.54  | 270336.61 | 696104.52  | 698468.10  | 732503.02  |
| 116298.64  | 255911.99  | 124084.20  | 283393.64  | 259683.59  | 101909.32 | 263566.15  | 264634.45  | 274006.56  |
| 55248.02   | 96064.14   | 55184.63   | 126707.72  | 126542.59  | 46917.99  | 124408.07  | 126241.23  | 129188.31  |
| 35527.76   | 64594.65   | 36434.02   | 80141.06   | 75359.87   | 32199.33  | 76061      | 81788.08   | 80562.83   |
| 91865.88   | 186470.52  | 94136.02   | 221345.95  | 206253.92  | 79409.50  | 206170.17  | 208128.81  | 212691.03  |
| 626979.24  | 1550648.86 | 678343.86  | 1533419.74 | 1319550.64 | 556383.30 | 1342031.74 | 1370177.66 | 1448923.11 |
| 279476.76  | 578098.10  | 292884.15  | 665616.68  | 622052.02  | 247797.14 | 625324.09  | 639659     | 665561.70  |
| 403503.17  | 811324.52  | 423880.97  | 972850.03  | 920349.43  | 350032.49 | 932727.88  | 938460.69  | 948103.69  |
| 437807.24  | 852862.48  | 459266.60  | 1008336.86 | 944457.13  | 387744.26 | 955970.21  | 1008546.85 | 1005460.48 |
| 590971.97  | 1190217.36 | 619291.17  | 1396285.01 | 1306674.40 | 523142.75 | 1317694.10 | 1354318.36 | 1403085.12 |



|           |            |            |            |            |           |            |            |            |
|-----------|------------|------------|------------|------------|-----------|------------|------------|------------|
| 206526.62 | 376056.81  | 210892.33  | 472536.90  | 459840.71  | 178381.47 | 458711.31  | 474607.97  | 481228.08  |
| 269457.75 | 539904.63  | 281676.14  | 640625.08  | 605803.78  | 235793.97 | 609251.33  | 618198.34  | 643118.25  |
| 271311.12 | 546423.60  | 279748.15  | 622610.20  | 605614.93  | 235410.57 | 598783.01  | 625143.54  | 646028.55  |
| 0         | 196        | 2.58       | 0          | 270.86     | 384       | 76         | 1.14       | 10.28      |
| 140284.79 | 309047.25  | 146697.70  | 331725.48  | 301249.43  | 125278.63 | 297822.88  | 310564.97  | 330060.53  |
| 754627.93 | 1535302.23 | 780685.15  | 1780238.10 | 1690164.83 | 664621.58 | 1682753.85 | 1718641.94 | 1784212.47 |
| 731738.63 | 1364405.31 | 755442.38  | 1692836.68 | 1618039.60 | 635341.38 | 1623999.89 | 1682369.11 | 1706970.57 |
| 372916.80 | 804512.79  | 393020.93  | 912613.83  | 845662.15  | 325641.11 | 849250.36  | 853121.59  | 883587.34  |
| 996430.17 | 1822234.47 | 1038513.93 | 2362828    | 2191715.73 | 894506.21 | 2239253.67 | 2308913.58 | 2405666.22 |
| 33181.39  | 46778.77   | 28553.82   | 63344.06   | 75348.76   | 25353.12  | 64715.16   | 74308.93   | 71024.38   |
| 103337.37 | 274610.41  | 104109.85  | 231754.70  | 229517.42  | 85450.79  | 212938.76  | 223433.43  | 239101.17  |
| 16634.02  | 26730.91   | 15847.85   | 35975.84   | 33277.62   | 15944.15  | 32479.59   | 37152.84   | 38931.90   |
| 0         | 0          | 0          | 3          | 115        | 0         | 0          | 0          | 0          |
| 891621.23 | 2022510.98 | 956712.34  | 2266095.56 | 2078376.70 | 767879    | 2107091.09 | 2036925.79 | 2171106.15 |
| 132763.94 | 262933.46  | 137919.06  | 313515.59  | 296775.84  | 116744.84 | 299262.32  | 305537.32  | 313865.42  |
| 297544.76 | 594555.78  | 308850.02  | 704396.66  | 677766.05  | 262532.01 | 681253.52  | 693209.38  | 688920.46  |
| 0         | 0          | 0          | 0          | 0          | 0         | 0          | 0          | 0          |
| 0         | 0          | 0          | 0          | 0          | 0         | 0          | 0          | 0          |
| 835803.07 | 1843178.38 | 888821.30  | 2073661.55 | 1927060.03 | 719450.48 | 1943095.17 | 1908639.77 | 2007257.64 |
| 0         | 0          | 0          | 19.50      | 0          | 0         | 0          | 0          | 0          |
| 49434.22  | 109097.35  | 52960.58   | 117717.24  | 106693.17  | 42984.66  | 108754.33  | 111553.45  | 115763.03  |

| B9         | C1         | C10        | C11        | C12        | C13        | C14        | C15        | C16        |
|------------|------------|------------|------------|------------|------------|------------|------------|------------|
| 0          | 0          | 0          | 4.60       | 0          | 0          | 0          | 2.40       | 0          |
| 439784.86  | 574567.04  | 696583.74  | 271356.63  | 610102.98  | 823639.60  | 268912.68  | 267183.32  | 241891.11  |
| 1731401.10 | 2764662.66 | 2493690.07 | 1476671.23 | 2068975.46 | 4143090.61 | 1469573.64 | 1478004.33 | 1347948.94 |
| 308392.38  | 616510.28  | 566400.93  | 277906     | 483018.47  | 984390.42  | 279033.66  | 276107.61  | 251912.36  |
| 41142      | 73982.70   | 60445.76   | 25192.40   | 43343.26   | 62804.82   | 24946.85   | 25224.41   | 22869.93   |
| 15734.25   | 8269.30    | 23917.10   | 23318.09   | 23048.76   | 2174.54    | 21774.80   | 23195.07   | 21583.41   |
| 115882.87  | 275342.76  | 195034.90  | 144670.30  | 153010.13  | 370942.28  | 144046.60  | 145111.89  | 133146.39  |
| 0          | 0          | 0          | 0          | 0          | 0          | 0          | 0          | 0          |
| 3612346.88 | 6173092.83 | 6226743.70 | 3747960.63 | 5185120.58 | 7654175.64 | 3622802.54 | 3720745.44 | 3425570.52 |
| 26225.18   | 46927.89   | 42391.51   | 68394.95   | 31111.60   | 64542.83   | 65866.82   | 68825.54   | 64330.92   |
| 149466.87  | 126736.78  | 267543.77  | 61292.88   | 249235.72  | 133673.75  | 56386.47   | 56813.38   | 51901.63   |
| 435178.50  | 648179.20  | 754873.46  | 141272.78  | 652472.48  | 1519613.31 | 158457.96  | 130705.89  | 115939.63  |
| 17727.98   | 16744.32   | 70339.66   | 3484.82    | 64769      | 2388.18    | 2127.18    | 2319       | 2470       |
| 17462.41   | 50395.27   | 77635.56   | 26093.78   | 70957.17   | 3647.84    | 23250.23   | 25531.52   | 23520.74   |
| 20         | 439        | 1720       | 156        | 63.50      | 61         | 50         | 83         | 119        |
| 15729.42   | 7783.55    | 23852.97   | 1998.42    | 21644.09   | 1935.87    | 1580.47    | 1646.74    | 1137.08    |
| 300616.82  | 791542.54  | 447717.60  | 320059.36  | 312441.20  | 635489.64  | 313364.92  | 326471.14  | 290967.79  |
| 148315.30  | 505642.90  | 314564.82  | 151419.35  | 239446.39  | 375715.32  | 148754.66  | 150165.57  | 136720.97  |
| 156500.75  | 143784.28  | 272513.02  | 37372.26   | 258698.87  | 69727.62   | 30991.91   | 31669.42   | 29797.48   |
| 13.16      | 60423.08   | 5060.20    | 325        | 536.50     | 247.23     | 407.80     | 558.53     | 86         |
| 227010.73  | 276277.84  | 323098.93  | 130963.21  | 276923     | 610723.71  | 132794.37  | 127164.65  | 116308.75  |
| 0          | 0          | 0          | 0          | 0          | 0          | 0          | 0          | 0          |
| 269005.18  | 432935.15  | 382977.62  | 244694.69  | 319212.20  | 621563.95  | 242556.36  | 245303.89  | 223853.87  |
| 899459.53  | 1284128.50 | 1206268.02 | 422868.47  | 1023450.97 | 3329980.91 | 457243.05  | 403625.86  | 362073.56  |
| 43511.31   | 22361.03   | 72287.35   | 4364.26    | 97828.52   | 4028.75    | 3620.83    | 3865.29    | 2804.83    |
| 0          | 0          | 0          | 0          | 0          | 0          | 0          | 0          | 0          |
| 205875.36  | 360052.36  | 278470.32  | 195714.75  | 227597.66  | 851352.18  | 202849.96  | 194310.45  | 179001.65  |
| 64265.13   | 89789.71   | 154321.99  | 31786.94   | 140502.02  | 126363.06  | 30161.19   | 30019.04   | 26741.05   |
| 90732.90   | 152511.32  | 243296.57  | 80595.52   | 212261.11  | 131284.30  | 73850.77   | 75678.63   | 70991.42   |
| 238617.33  | 533133.16  | 538081.32  | 39106.12   | 444765.98  | 976692.12  | 53957.74   | 33031.96   | 25101.45   |
| 329835.44  | 335870.30  | 917788.08  | 115221.56  | 851350.04  | 212473.57  | 96072.03   | 97057.82   | 92076.33   |
| 0          | 0          | 0          | 0          | 0          | 0          | 0          | 7.50       | 0          |
| 9756       | 1508.08    | 3832       | 302.50     | 4239.92    | 166        | 165.58     | 125        | 89         |

|            |            |            |           |            |            |           |           |           |
|------------|------------|------------|-----------|------------|------------|-----------|-----------|-----------|
| 265280.32  | 264948.59  | 511629.25  | 56364.77  | 494483.06  | 557904.61  | 58485.42  | 46543.04  | 42167.87  |
| 0          | 0          | 0          | 0         | 0          | 4          | 0         | 0         | 0         |
| 15565.16   | 8111.82    | 4240.30    | 903.60    | 2505.92    | 59671.60   | 2204.26   | 959.20    | 392.75    |
| 4896.49    | 12162.48   | 20515.28   | 1302.72   | 18132      | 59811.11   | 2291.60   | 815.32    | 861.69    |
| 23273.23   | 21886.97   | 73267.40   | 6756.63   | 106304.10  | 6684.20    | 4739.31   | 5598.50   | 3563.09   |
| 18088.52   | 8468.74    | 13242.96   | 109120.55 | 8419.91    | 5222.24    | 103098.62 | 112249.64 | 103508.23 |
| 5372.33    | 1666.84    | 5862.87    | 653.92    | 10474.42   | 551.17     | 540.83    | 580.91    | 239.33    |
| 975338.78  | 1677413.77 | 1620160.06 | 812134.66 | 1392188.98 | 2188166.55 | 800827.08 | 807409.46 | 734655.73 |
| 1095388.77 | 1618090.31 | 1886734.45 | 766024.71 | 1582714.76 | 2484941.05 | 747267.15 | 746965.16 | 677726.53 |
| 0          | 0          | 0          | 0         | 0          | 4          | 0         | 0         | 0         |
| 493.52     | 5063.88    | 4134.52    | 44657.71  | 8652.84    | 2045.43    | 41639.78  | 45383.05  | 41606.79  |
| 499        | 1003.72    | 2512.67    | 559.52    | 13334      | 678        | 683.98    | 657.56    | 343.98    |
| 17727.98   | 16744.32   | 70339.66   | 3484.82   | 64769      | 2388.18    | 2127.18   | 2319      | 2470      |
| 0          | 0          | 0          | 0         | 0          | 2          | 0         | 0         | 0         |
| 173332.53  | 214544.15  | 321011.29  | 45926.88  | 277137.22  | 138400.72  | 40288.59  | 40780.08  | 34609.05  |
| 85249.01   | 104450.06  | 131573.30  | 31395.31  | 114471.62  | 126836.90  | 30293.74  | 29449.63  | 26142.53  |
| 144939.51  | 174276.01  | 181329.66  | 78957.45  | 146926.97  | 309875.67  | 80815.38  | 79059.74  | 70690.22  |
| 92116      | 136427.38  | 125310.34  | 73877.33  | 106778.45  | 186762.96  | 73247.61  | 74196.31  | 67612.50  |
| 0          | 0          | 0          | 0         | 0          | 0          | 0         | 0         | 0         |
| 15745.92   | 8616.90    | 26115.97   | 2308.27   | 21835.09   | 2609.87    | 1973.12   | 3187.04   | 1319.73   |
| 4.33       | 138.50     | 0          | 3.50      | 4.50       | 7          | 0         | 3         | 11        |
| 0          | 274        | 854.50     | 1450      | 204        | 912        | 372       | 586.50    | 48        |
| 108583.79  | 97783.75   | 272793.48  | 17104.95  | 245901.95  | 189836.92  | 15766.19  | 13252.69  | 10471.30  |
| 735184.90  | 929998.28  | 1210965.17 | 448064.16 | 1031509.87 | 963822.30  | 431075.13 | 440115.91 | 399532.25 |
| 25325.40   | 21345.86   | 72391.06   | 5118.19   | 68311.09   | 4367.16    | 3847.39   | 3977.13   | 3167.68   |
| 358169.72  | 807858.70  | 672449.16  | 391686.08 | 556685.33  | 1167471.29 | 389015.88 | 389877.50 | 357607.67 |
| 36859.51   | 11106.53   | 27400.07   | 3495.76   | 24700.92   | 4311.72    | 2979.12   | 4621.62   | 2095.51   |
| 222400.85  | 436193.54  | 405131.66  | 200054.89 | 350278.68  | 853839.77  | 205062.16 | 197563.29 | 181264.43 |
| 8159.26    | 2273.92    | 2540.29    | 572.51    | 487.69     | 869.50     | 592.83    | 736.16    | 487.33    |
| 206598.44  | 142180.08  | 269944.84  | 82316.58  | 235482.08  | 74087.07   | 74526.92  | 78540.48  | 72311.56  |
| 48249.65   | 40330.05   | 119578.66  | 7427.13   | 109902.51  | 64868.10   | 6711.87   | 5439.71   | 4869.02   |
| 1112.28    | 7770.85    | 4296       | 747       | 2707.25    | 724.80     | 625.25    | 1090.48   | 365       |
| 67795.51   | 102431.20  | 89896.46   | 49927.52  | 78330.94   | 124668.71  | 49017.96  | 49667.89  | 45259.45  |
| 17727.98   | 16744.32   | 70339.66   | 3484.82   | 64769      | 2391.18    | 2127.18   | 2319      | 2470      |



|            |            |            |            |            |            |            |            |            |
|------------|------------|------------|------------|------------|------------|------------|------------|------------|
| 0          | 4          | 0          | 0          | 6          | 42         | 0          | 0          | 0          |
| 133006.31  | 278170.21  | 267197.37  | 125841.39  | 222628.14  | 489659.31  | 126939.27  | 125251.52  | 113900.99  |
| 349035.55  | 655334.95  | 575070.14  | 321772.48  | 478482.97  | 752818.69  | 317091.22  | 322105.33  | 293655.86  |
| 40063.88   | 23253.79   | 78607.81   | 6720.50    | 60275.26   | 4394.60    | 3563.94    | 5392.28    | 3144       |
| 16911.91   | 40485.69   | 26815.30   | 24332.34   | 19849.51   | 61727.72   | 23901.75   | 24166.88   | 22209.85   |
| 17105.83   | 47446.27   | 61558.67   | 25464.26   | 49202.84   | 62738.77   | 24724.57   | 25166.08   | 23053.13   |
| 107886.80  | 108478.38  | 269106.80  | 61136.79   | 240445.85  | 191187.03  | 56365.34   | 56526.55   | 51936      |
| 29906.97   | 20328.60   | 78128.73   | 4144.57    | 69768.92   | 2775.18    | 2424.51    | 2619.85    | 2802       |
| 0          | 0          | 0          | 0          | 0          | 0          | 0          | 0          | 0          |
| 0          | 0          | 0          | 0          | 0          | 0          | 0          | 0          | 0          |
| 488259.16  | 734372.97  | 1148551.29 | 267021.10  | 1043930.73 | 1003605.37 | 258281.42  | 250832.66  | 229590.27  |
| 55889.37   | 64059.96   | 150840.69  | 8926       | 143837.76  | 6313.36    | 5712.34    | 5908.31    | 5702.65    |
| 80680.53   | 85386.62   | 168151.07  | 31346.24   | 145480.18  | 126301.24  | 30514.28   | 29435.53   | 27343.13   |
| 275771.39  | 402278.56  | 408445.57  | 248320.92  | 345335.27  | 685337.74  | 246789.82  | 248906.50  | 226410.07  |
| 64791.85   | 67673.16   | 112003.52  | 29256.06   | 91956.93   | 65543.48   | 27063.83   | 27770.84   | 24748.57   |
| 432264.52  | 445307.04  | 949078.43  | 107185.82  | 859948.36  | 640837.55  | 100114.83  | 93373.69   | 81237.94   |
| 1256625.99 | 1687292.59 | 2575342.68 | 878263.44  | 2236143.11 | 1842525.91 | 817690.48  | 841019.04  | 772717.98  |
| 43761.43   | 68808.35   | 61220.57   | 25939.37   | 47969.02   | 4328.63    | 23559.65   | 25592.65   | 22888.71   |
| 552733.81  | 711266.42  | 819705.56  | 323329.57  | 739846.16  | 1068712.73 | 320133.73  | 319326.59  | 286546.82  |
| 152807.32  | 201176.83  | 375029.25  | 88145.42   | 387069.47  | 134862.41  | 78072.59   | 80401.38   | 74702.31   |
| 42245.50   | 90497.75   | 80888.41   | 26280.15   | 73664.60   | 62766.07   | 25048.92   | 25304.42   | 23334.37   |
| 23327.25   | 41675.93   | 31561.23   | 23916.59   | 25863.76   | 61742.05   | 23950.25   | 24215.97   | 22108.02   |
| 350047.70  | 317970.15  | 492713.72  | 139869.82  | 412873.55  | 263606.52  | 129505.76  | 133863.74  | 121014.29  |
| 450        | 452        | 0          | 8          | 398        | 18         | 0          | 0          | 0          |
| 0          | 4          | 0          | 0          | 6          | 42         | 0          | 0          | 0          |
| 1803667.80 | 2844475.77 | 3688820.92 | 1422932.48 | 3191234.56 | 4492708.43 | 1388184.85 | 1382036.28 | 1277868.56 |
| 62853.21   | 41217.57   | 171787.18  | 8984.40    | 157216.44  | 5702.08    | 4762.94    | 5315.34    | 5142.99    |
| 507.50     | 215.84     | 322.33     | 21363.17   | 1456.67    | 213.34     | 20136.16   | 21469.24   | 20415.41   |
| 14792.25   | 15802.18   | 25386.03   | 1943.89    | 23489.42   | 60544.05   | 3004.22    | 1473.97    | 1261.94    |
| 189231.41  | 173066.77  | 362408.80  | 67348.16   | 353137.72  | 491652.05  | 70363.53   | 60916.98   | 56278.21   |
| 1007       | 29937.74   | 30751.98   | 3643.90    | 34085      | 2827.78    | 3259.72    | 1912.13    | 2421.51    |
| 1287322.87 | 2237339.02 | 1698498.95 | 1250968.22 | 1379754.28 | 3507550.10 | 1255648.85 | 1261829.88 | 1152348.60 |
| 0          | 0          | 0          | 0          | 0          | 4          | 0          | 0          | 0          |
| 55504.90   | 66627.62   | 70460.97   | 7885.55    | 57820.68   | 66459.33   | 7800.31    | 7830.04    | 3966.98    |

|            |            |            |            |            |            |            |            |            |
|------------|------------|------------|------------|------------|------------|------------|------------|------------|
| 350856.68  | 673468.92  | 542869.54  | 298263.56  | 450443.22  | 1101885.06 | 303201.52  | 296939.75  | 271693.94  |
| 2457       | 258.75     | 45         | 158.50     | 398        | 121        | 125.25     | 101        | 73         |
| 619587.41  | 1089719.47 | 927020.87  | 628997.17  | 752197.25  | 1667422.92 | 626715.64  | 632102.89  | 578528.71  |
| 4.33       | 171.17     | 7          | 32.17      | 4.50       | 107        | 85.33      | 52.66      | 35.33      |
| 0          | 0          | 0          | 0          | 0          | 0          | 0          | 0          | 0          |
| 204185.09  | 341627.60  | 296693.75  | 200268.44  | 242488.50  | 559032.45  | 196677.40  | 198639.43  | 179209.27  |
| 0          | 0          | 0          | 0          | 0          | 4          | 0          | 0          | 0          |
| 16891.16   | 8250.49    | 4312.30    | 1047.77    | 4138.92    | 59818.60   | 2350.59    | 1101.86    | 503.08     |
| 17727.98   | 16744.32   | 70339.66   | 3484.82    | 64769      | 2388.18    | 2127.18    | 2319       | 2470       |
| 32937      | 24368.43   | 49734.35   | 4262.04    | 50776.84   | 62480.33   | 4605.05    | 3467.78    | 2609.04    |
| 0          | 94.75      | 0          | 11.67      | 36         | 41         | 11         | 15         | 7          |
| 2099       | 580.17     | 821.80     | 197.92     | 457        | 348.50     | 277.08     | 610.16     | 155.33     |
| 120142.34  | 190054.76  | 228188.70  | 58663.94   | 225031.46  | 249700.96  | 58499.13   | 56497.83   | 50921.63   |
| 520706.91  | 622215     | 856266.96  | 230664.27  | 739399.24  | 640689.68  | 219447.45  | 222700.91  | 199290.19  |
| 476281.16  | 470938.13  | 971961.34  | 217334.21  | 865408.46  | 471305.35  | 200479.85  | 207138.83  | 183431.01  |
| 797764.83  | 796162.99  | 1472517.78 | 274558.59  | 1321786.83 | 1444969.24 | 272809.46  | 255616.63  | 230324.67  |
| 11225.59   | 2872.65    | 5115.80    | 508        | 5901.92    | 503.10     | 412.32     | 860.43     | 208        |
| 659260.36  | 1124162.67 | 691020.76  | 771558.89  | 536911.09  | 1603112.80 | 758984.61  | 777960.35  | 714300.54  |
| 446956.43  | 582025.93  | 899633.27  | 212298.95  | 786735.69  | 1114092.97 | 211592.91  | 201956.49  | 180888     |
| 105723.63  | 179153.75  | 164545.34  | 95859.40   | 125655.38  | 186954.08  | 94106.96   | 97384.20   | 88536.49   |
| 75247.06   | 73059.77   | 146337.13  | 31993.80   | 163784.28  | 185615.08  | 32672.03   | 29260.76   | 26705.72   |
| 2430520.38 | 3425118.28 | 3629424.92 | 1620138.21 | 3113630.48 | 5378356.00 | 1604073.93 | 1587877.42 | 1447946.16 |
| 1307955    | 2212695.10 | 1950869.65 | 1218630.39 | 1610161.82 | 3217222.70 | 1210110.29 | 1219832.79 | 1115659.43 |
| 5707.99    | 12648.80   | 19918.28   | 1459.31    | 19514.50   | 59929.28   | 2395.58    | 917.41     | 973.27     |
| 1378.09    | 7407       | 31474.66   | 1547.10    | 28430      | 1064.94    | 887.56     | 1055.49    | 1009.33    |
| 0          | 11.67      | 0          | 2.67       | 0          | 61         | 55.33      | 34.66      | 26.33      |
| 48806.36   | 345747.73  | 46563.89   | 110200.91  | 29606.85   | 533756.48  | 117249.55  | 109709.01  | 103722.87  |
| 183595.70  | 203878.79  | 277866.29  | 89434      | 234033.70  | 380701.40  | 90386.73   | 88068.43   | 77146.13   |
| 0          | 0          | 0          | 0          | 0          | 0          | 0          | 0          | 0          |
| 47607.43   | 41880.46   | 83803.96   | 26451.77   | 78453.11   | 3256.38    | 23092.75   | 24509.94   | 22948.54   |
| 190739.67  | 181457.11  | 365891.40  | 24833.16   | 301026.14  | 490201.89  | 27946.30   | 18304.23   | 13997.73   |
| 1.50       | 1018.37    | 498        | 149.67     | 1589       | 176        | 176.33     | 137.26     | 76.33      |
| 0          | 4          | 0          | 0          | 6          | 42         | 0          | 0          | 0          |
| 17806.58   | 8046.27    | 10358.98   | 45167.65   | 16642.80   | 5385.56    | 43624.83   | 48375.82   | 42416.85   |

|            |            |            |            |            |            |            |            |           |
|------------|------------|------------|------------|------------|------------|------------|------------|-----------|
| 337433.72  | 330519.73  | 535300.32  | 163683.90  | 481596.49  | 382515.47  | 154107.02  | 156738.43  | 144004.40 |
| 0          | 0          | 0          | 7          | 0          | 6          | 5          | 5          | 6         |
| 6379.26    | 1858.07    | 1266.80    | 514.50     | 2458       | 496.10     | 426.24     | 882.93     | 244       |
| 0          | 0          | 0          | 12         | 0          | 6          | 32         | 5          | 6         |
| 35331.59   | 13307.17   | 37579.35   | 2218.24    | 50838.19   | 2154.38    | 1950.40    | 2025.15    | 1419.19   |
| 266330.92  | 411703.56  | 388130.61  | 223007.99  | 342221.09  | 678121.15  | 222335.74  | 220902.98  | 202771.16 |
| 506886.69  | 852563.02  | 685634.58  | 482528.49  | 547332.45  | 1295390.16 | 482072.74  | 486377.52  | 443513.92 |
| 101902.70  | 83974.66   | 135496.22  | 53837.52   | 114556.36  | 127794.83  | 51627.94   | 51968.48   | 47729.34  |
| 493941.60  | 833126.25  | 794678.61  | 382070.30  | 687573.19  | 1532978.67 | 388542.13  | 379349.72  | 345774.83 |
| 339903.99  | 536414.73  | 548449.59  | 297355.40  | 476742.52  | 804003.94  | 292803.73  | 290711.88  | 270588.16 |
| 83387.94   | 141858.45  | 163733.47  | 54389.28   | 144225.19  | 129274.71  | 52864.16   | 52946.28   | 48986.23  |
| 1004690.39 | 1430281.24 | 1580274.85 | 717472.10  | 1338757.66 | 2056862.79 | 707284.62  | 708433.25  | 646723.34 |
| 0          | 0          | 0          | 2          | 6          | 26         | 39         | 17         | 10        |
| 43682.43   | 69907.53   | 58240.75   | 26117.67   | 50307.77   | 180848.93  | 28025.60   | 25380.57   | 23038.04  |
| 1780.50    | 2026.31    | 4145.01    | 21956.16   | 6062.17    | 1091.78    | 20811.58   | 22081      | 20837.77  |
| 800796.21  | 1356184.36 | 1224012.67 | 649922.89  | 1014088.50 | 1803901.68 | 646022.05  | 650311.27  | 591111.09 |
| 45176.07   | 76140.86   | 75949.45   | 26669.73   | 59230.85   | 122028.98  | 26407.82   | 25375.77   | 23259.13  |
| 256334.89  | 332574.31  | 418239.71  | 159682.52  | 351199.68  | 501717.05  | 157667.14  | 158844.30  | 141944.38 |
| 719669.49  | 1181414.95 | 1199070.82 | 494813.60  | 1015765.89 | 2203264.97 | 504945.50  | 482390.76  | 443370.26 |
| 100945.31  | 180337.96  | 230513.92  | 78964.18   | 198778.28  | 190062.19  | 75964.79   | 77274.67   | 70733.33  |
| 6262.32    | 11537.44   | 34750      | 2826.53    | 48955      | 1693.34    | 1661.41    | 1597.23    | 1585.82   |
| 168356.06  | 203064.12  | 281876.54  | 61676.81   | 256963.47  | 192839.63  | 58968.40   | 58874.83   | 51963.38  |
| 951517.04  | 1815219.29 | 1331831.06 | 1049128.32 | 1086827.97 | 2473338.70 | 1042415.14 | 1056603.93 | 969265.69 |
| 305172.11  | 277497.05  | 856193.74  | 56486.68   | 764025     | 38640.11   | 34942.90   | 37893.74   | 36811.63  |
| 22641.75   | 5543.25    | 6506.06    | 1684.52    | 1541.03    | 2946.75    | 2052.70    | 2838.49    | 1197.94   |
| 155014.09  | 140490.06  | 256772.91  | 36583.04   | 241779.87  | 69238.84   | 30530.57   | 31196.14   | 29280.37  |
| 90694.46   | 89872.36   | 189203.60  | 32339.19   | 165452.85  | 66821.19   | 28729.43   | 28858.30   | 27321.57  |
| 11847.18   | 37183.39   | 15845.42   | 65446.98   | 12367.43   | 60958.39   | 63167.38   | 66728.14   | 61889.43  |
| 328729.30  | 476659.92  | 521027     | 233105.89  | 444873.95  | 804116.16  | 232065.62  | 229063.57  | 208992.49 |
| 270899.92  | 363406.10  | 549834.93  | 34900.27   | 452088.01  | 146270.43  | 28100.99   | 29029.94   | 20441.40  |
| 124821.14  | 92101.88   | 267276.69  | 37219.98   | 261518.62  | 72283.05   | 33467.33   | 34440.71   | 30116.42  |
| 0          | 134.17     | 0          | 2.67       | 0          | 48         | 55.33      | 33.66      | 23.33     |
| 215600.99  | 308824.04  | 582765.83  | 98717.02   | 528482.66  | 202727.27  | 87306.67   | 89359.35   | 82207.97  |
| 28076.81   | 49217.74   | 38758.20   | 26122.15   | 40399.35   | 64555.07   | 26262.36   | 26842.18   | 23614.23  |

|            |            |            |           |            |            |           |           |           |
|------------|------------|------------|-----------|------------|------------|-----------|-----------|-----------|
| 0          | 0          | 0          | 0         | 0          | 0          | 0         | 0         | 0         |
| 29684.44   | 21852.66   | 51420.73   | 3219.37   | 42071.84   | 2348.20    | 2230      | 2274.63   | 1876.88   |
| 13961.08   | 31583.80   | 27384.39   | 44439.67  | 21866.26   | 1374.41    | 41292.42  | 44112.71  | 41643.32  |
| 22524.65   | 15454.09   | 25787.78   | 1756.15   | 22475.92   | 60080.28   | 2433      | 928.97    | 1012.61   |
| 47527.88   | 44623.80   | 160192.92  | 9438.24   | 153276.76  | 6254.89    | 5239.96   | 6055.36   | 5561.65   |
| 186232.49  | 264062.50  | 303951.52  | 109653.33 | 264042.31  | 729730.02  | 116938.20 | 106171.07 | 96626.75  |
| 64731.95   | 133543.30  | 130919.99  | 9801.88   | 91196.51   | 9181.23    | 8064.25   | 9278.73   | 5952.32   |
| 156507.04  | 143767.39  | 355130.11  | 45737.02  | 341432.87  | 315667.58  | 46056.60  | 40334.56  | 36091.12  |
| 498890.63  | 866248.47  | 747229.11  | 443729.07 | 636024.76  | 1061331.07 | 436547.80 | 443914.52 | 405089.63 |
| 9534.09    | 10727.83   | 7480.90    | 1125.01   | 7840.42    | 118978.43  | 3809.96   | 1274.81   | 517.91    |
| 405696.19  | 584799.07  | 601567.79  | 394903.61 | 488766.20  | 1115760.78 | 391858.28 | 394558.84 | 360081.37 |
| 192918.46  | 270726.87  | 255596.23  | 256730.77 | 228029.60  | 790775.70  | 258775.85 | 257719.16 | 238347.27 |
| 125799.18  | 118972.07  | 181061.68  | 35387.94  | 162104.96  | 248070.75  | 36263.18  | 32510.39  | 28644.38  |
| 63378.13   | 236496.01  | 117501.66  | 157255.43 | 102796.46  | 67281.08   | 148928.59 | 158019    | 147712.82 |
| 24086.75   | 16036.84   | 48610.19   | 2927.31   | 47335.93   | 2449.48    | 2168.36   | 2386.39   | 1808.77   |
| 29988.73   | 35964.03   | 66872.68   | 4086.67   | 61818.17   | 2687.14    | 2508.75   | 2292.61   | 2620.32   |
| 16421.91   | 33198.49   | 29803.22   | 2526.25   | 21430.17   | 2469.94    | 2101.84   | 2797.50   | 1541.58   |
| 16308.26   | 7750.64    | 25106.78   | 1655.89   | 20876.92   | 1027.48    | 991.39    | 1012.23   | 829.44    |
| 599855.14  | 819069.52  | 949930.35  | 311130.85 | 841575.44  | 1191180.50 | 309410.52 | 303083.81 | 272799.12 |
| 23043.98   | 16716.24   | 58994      | 3184.50   | 48604      | 2498.37    | 2227.54   | 2197.36   | 2332      |
| 275209.10  | 387607.59  | 420901.55  | 161510.32 | 329899.07  | 620351.31  | 162437.83 | 159823.60 | 143346.83 |
| 52806.90   | 38437.66   | 149803.30  | 9060.30   | 157238.18  | 5935.12    | 5335.01   | 5580.44   | 5167.18   |
| 486088.67  | 730278.11  | 683543.28  | 314754.89 | 569096.84  | 1003481.99 | 316075.38 | 315589.21 | 282610.39 |
| 415383.07  | 844004.32  | 730489.61  | 479212.17 | 605607.89  | 1172223.35 | 471600.78 | 479179.70 | 440231.74 |
| 8159.26    | 3172.09    | 2630.77    | 868.58    | 1019.37    | 1190.60    | 804.16    | 1166.08   | 705.66    |
| 496        | 134.17     | 0          | 33.67     | 1594       | 41         | 43.33     | 48.16     | 30.33     |
| 448810.14  | 693682.47  | 674431.34  | 394678.72 | 570014.08  | 1108637.17 | 387184.69 | 390866.42 | 358039.10 |
| 1432538.82 | 1909760.18 | 2875715.63 | 858404.50 | 2494509.17 | 2275877.41 | 805049.20 | 807773.69 | 747147.07 |
| 40771.96   | 33543.56   | 129333.66  | 6669.32   | 113373     | 4899.55    | 4367.72   | 4527.36   | 4802      |
| 78580.25   | 151585.99  | 152478.30  | 53846.69  | 129815.44  | 245926.71  | 54912.21  | 52849.77  | 47740.19  |
| 38458.27   | 48844.10   | 56899.83   | 25296.18  | 45460.18   | 63027.32   | 25035.05  | 25735.72  | 22922.68  |
| 12431.31   | 35098.46   | 21243.67   | 1934.01   | 19877.67   | 2132.67    | 1853.14   | 1779.72   | 1202.32   |
| 946771.20  | 1508038.22 | 1181632.44 | 864125.98 | 945569.61  | 2042361.84 | 855010.79 | 865446.46 | 793421.10 |
| 41337.22   | 87118.93   | 55302.81   | 69803.76  | 44195.85   | 182768.22  | 69615.91  | 71349.14  | 64521.59  |

|           |            |            |           |           |            |           |           |           |
|-----------|------------|------------|-----------|-----------|------------|-----------|-----------|-----------|
| 612614.66 | 1056734.69 | 848622.60  | 602006.25 | 701416.92 | 1486511.95 | 599168.60 | 606954.55 | 555016.51 |
| 101577.33 | 199252.35  | 133132.68  | 117485.70 | 105639.21 | 306190.88  | 117629.03 | 118466.45 | 108982.52 |
| 20721.39  | 12320.53   | 9220.35    | 2699.44   | 1399.17   | 60697.36   | 2924.26   | 2606.06   | 836.93    |
| 38709.50  | 77496.03   | 42556.32   | 46851.83  | 31303.51  | 122773.03  | 47110.23  | 46924.74  | 43255.38  |
| 17727.98  | 16744.32   | 70339.66   | 3484.82   | 64769     | 2388.18    | 2127.18   | 2319      | 2470      |
| 3012.65   | 16855.59   | 49760.66   | 2763.60   | 43703.50  | 1865.51    | 1472.83   | 1640.38   | 1612.99   |
| 39392.82  | 61015.73   | 56422.54   | 25394.09  | 45541.68  | 62784.67   | 24821.34  | 25057.02  | 22840.49  |
| 364625.04 | 649985.77  | 537209.83  | 383675.59 | 432270.81 | 1044773.24 | 383078.81 | 385359.56 | 353752.20 |
| 151802.59 | 170976.80  | 317060.50  | 67334.89  | 280352.96 | 199148.19  | 64326.84  | 65095.92  | 56865.44  |
| 472137.80 | 635701.09  | 931896.71  | 299476.88 | 848998.98 | 763750.69  | 288279.53 | 288337.02 | 264584.07 |
| 0         | 652.50     | 0          | 0         | 0         | 0          | 0         | 0         | 0         |
| 505805.39 | 505299.42  | 1011457.27 | 235218.20 | 885022.53 | 285205.57  | 207288.55 | 218079.03 | 199973.55 |
| 185.41    | 26373.33   | 8888.48    | 21793.33  | 1980.84   | 535.88     | 20545.38  | 22047.53  | 20600.44  |
| 9443.50   | 1991.92    | 4366.67    | 806.67    | 17761     | 515        | 583.08    | 620.66    | 437.33    |
| 115584.75 | 173796.72  | 165265.73  | 78697.81  | 152354.86 | 191340.04  | 76565.25  | 78248.92  | 70153.47  |
| 0         | 0          | 0          | 0         | 0         | 0          | 0         | 0         | 0         |
| 0         | 0          | 0          | 0         | 0         | 0          | 0         | 0         | 0         |
| 9845.73   | 56378.65   | 9641.73    | 22304.80  | 7026.59   | 119257.94  | 23919.66  | 22370.13  | 20896.33  |
| 137924.73 | 128845.57  | 291488.78  | 38606.44  | 280412.86 | 130665.55  | 35099.74  | 32890.80  | 31370.83  |
| 37820.82  | 43667.87   | 124644.94  | 6993.04   | 119144.51 | 6011.46    | 5345.64   | 6686.16   | 4341.38   |
| 0         | 0          | 0          | 0         | 0         | 0          | 0         | 0         | 0         |
| 61452.15  | 108161.15  | 126141.13  | 30602.11  | 104511.19 | 185341.52  | 31676.36  | 30065.34  | 26351.14  |
| 0         | 0          | 0          | 0         | 0         | 0          | 0         | 0         | 0         |
| 46023.95  | 65298.25   | 121178.01  | 29572.79  | 104094.51 | 6829.30    | 25677.78  | 28340.69  | 25354.43  |
| 221477.23 | 330763.49  | 312240.55  | 174343.99 | 267626.74 | 496550.71  | 172826.21 | 174624.98 | 158124.60 |
| 61118.02  | 37152.13   | 94519.43   | 6344.77   | 83000.93  | 64713.83   | 5992.08   | 5038.08   | 4016.80   |
| 24910.66  | 16382.09   | 50939.20   | 3773.97   | 46294.51  | 3242.20    | 2672.36   | 3341.22   | 2324.21   |
| 15729.42  | 7783.55    | 23852.97   | 1998.42   | 21644.09  | 1935.87    | 1580.47   | 1646.74   | 1137.08   |
| 49005.74  | 70623.93   | 93406.22   | 27601.89  | 91614.43  | 122623.34  | 27254.12  | 25694.43  | 24033.71  |
| 275730.54 | 248245.98  | 746055.10  | 71573.11  | 651229.34 | 37731.10   | 52269.61  | 54632.35  | 53304.63  |
| 210918.15 | 319119.58  | 301091.60  | 174449.26 | 263281.83 | 438120.02  | 172865.48 | 176108.98 | 159134.11 |
| 185970.19 | 110599.04  | 347331.12  | 19161.40  | 345521.46 | 13505.68   | 12647.44  | 12060.60  | 10986.98  |
| 196511.07 | 118979.06  | 401221.12  | 24470.59  | 351450    | 20325.17   | 17427.26  | 19729.52  | 14667.99  |
| 430494.99 | 737189.05  | 623669.43  | 413475.70 | 516735.33 | 1111652    | 411623.64 | 414351.79 | 379114.49 |



|           |            |           |           |           |            |           |           |           |
|-----------|------------|-----------|-----------|-----------|------------|-----------|-----------|-----------|
| 126256.78 | 230814.10  | 180533.19 | 98330.61  | 150300.96 | 248230.26  | 96875.42  | 98490.39  | 89336.79  |
| 188008    | 332179.43  | 270530.97 | 197274.05 | 219514.08 | 497665.07  | 193562.34 | 196771.76 | 178064.16 |
| 435953.18 | 617174.49  | 335199.30 | 356132.63 | 270365.89 | 866139.38  | 353860.20 | 358172.82 | 327061.49 |
| 0         | 32         | 0         | 0         | 0         | 28         | 0         | 0         | 0         |
| 120480.88 | 259230.26  | 203009.96 | 81005.06  | 147956.62 | 194318.56  | 79509.33  | 81299.13  | 72031.86  |
| 632948.39 | 1213320.84 | 883134.51 | 521153.28 | 702132.21 | 2017457.29 | 531827.89 | 519886.76 | 473408.23 |
| 507372.60 | 778318.29  | 673003.33 | 398599.66 | 567655.92 | 935541.59  | 387511.77 | 400164.81 | 358898.52 |
| 184613.52 | 212006.44  | 517404.64 | 33390.66  | 472934.45 | 201049.72  | 25574.27  | 24275.15  | 20718.40  |
| 518854.77 | 703255.85  | 986254.05 | 285204.51 | 851365.36 | 881457.71  | 270441.09 | 272495.19 | 245294.54 |
| 38571.20  | 120198.58  | 101645.39 | 73358.70  | 84824.93  | 186116.77  | 71694.12  | 74803.57  | 66254.20  |
| 541522.95 | 589376.98  | 224580.78 | 496395.24 | 141783.42 | 736423.58  | 481455.06 | 499037.32 | 461420.37 |
| 12285.26  | 3860.27    | 4287.57   | 43718.73  | 3449.05   | 2172.87    | 41254.99  | 44833.39  | 41645.74  |
| 0         | 0          | 0         | 0         | 0         | 0          | 0         | 0         | 0         |
| 458180.86 | 446337.98  | 848742.17 | 119940.79 | 797288.87 | 810804.68  | 120997.35 | 104287.78 | 96942.91  |
| 93146.82  | 178380.61  | 127072.32 | 95359.90  | 105459.36 | 363238.32  | 97523.17  | 93901.66  | 87851.72  |
| 154059.04 | 182549.39  | 209126.06 | 77373     | 214563.56 | 69565.75   | 71619.48  | 74658.71  | 68750.19  |
| 0         | 0          | 0         | 0         | 0         | 0          | 0         | 0         | 0         |
| 0         | 0          | 0         | 0         | 0         | 0          | 0         | 0         | 0         |
| 470011.52 | 645038.78  | 963292.46 | 236350.20 | 889536.46 | 1175226.60 | 238514.49 | 224156.71 | 204223.23 |
| 0         | 69.50      | 62.50     | 80        | 4.50      | 19         | 18        | 7.50      | 0         |
| 41663.18  | 38733.04   | 49689.39  | 24514.62  | 39312.09  | 2631.49    | 22262.90  | 23745.82  | 22209.19  |

| C17        | C18        | C19        | C2         | C20        | C3         | C4         | C5         | C6         |
|------------|------------|------------|------------|------------|------------|------------|------------|------------|
| 0          | 0          | 3.40       | 0          | 0          | 0          | 3.60       | 0          | 0          |
| 243265.40  | 1067070.46 | 376626.81  | 620797.13  | 297574.82  | 693835.56  | 344626.21  | 268092.97  | 594437.61  |
| 1342849.42 | 3950597.97 | 2069193.11 | 2262980.19 | 1644410.27 | 2590580.62 | 1437909.91 | 1427818.93 | 2692819.22 |
| 251685.83  | 870838.53  | 405208.12  | 474085.50  | 326413.62  | 545717.74  | 328488.08  | 269503.43  | 617398.40  |
| 23013.11   | 101727.64  | 40776.56   | 48611.72   | 31736.35   | 56169.19   | 38522.15   | 25267.81   | 48650.48   |
| 20939.11   | 51576.54   | 8529.99    | 27443.73   | 10670.79   | 38524.84   | 7851.47    | 21217.27   | 15472.55   |
| 131003.84  | 274773.07  | 180129.32  | 174271.67  | 137886     | 226971.80  | 136331.58  | 143232.43  | 193714.82  |
| 0          | 0          | 0          | 0          | 0          | 0          | 139        | 0          | 0          |
| 3380762.23 | 9259192.80 | 4144201.35 | 5710908.20 | 3371030.05 | 5997737.48 | 3610759.39 | 3628847.08 | 7135749.11 |
| 61885.73   | 76170.50   | 46917.62   | 60337.37   | 45021.80   | 58694.13   | 29538.78   | 64403.74   | 89498.47   |
| 53395.32   | 354167.16  | 72428.48   | 201913.76  | 62309.89   | 213635.19  | 98746.99   | 62423.91   | 182011.84  |
| 125241.92  | 1002020.84 | 330128.09  | 605113.48  | 312647.22  | 750156.70  | 356401.26  | 160219.27  | 781316.09  |
| 2777.50    | 23985.90   | 3175.67    | 43484.68   | 4691.31    | 33988.34   | 21500.82   | 4666.18    | 21365.15   |
| 23281.95   | 99138.27   | 25197.53   | 59442.17   | 18362.31   | 62883.43   | 34389.98   | 23417.98   | 73069.83   |
| 82         | 878.50     | 161        | 2605       | 268        | 1775       | 1060.50    | 116        | 317.50     |
| 1541.44    | 50942.10   | 2269.99    | 19852.07   | 1834.46    | 28537.38   | 7554.39    | 2883.52    | 11280.39   |
| 290296.65  | 920361.51  | 481777.08  | 443288.86  | 341656.86  | 672787.66  | 401385.25  | 328468.46  | 589174.13  |
| 136409.10  | 523863.37  | 247971.07  | 269308.38  | 178656.98  | 308149.20  | 249681.93  | 159623.17  | 348702.02  |
| 31307.05   | 297925.65  | 37829.89   | 201410.02  | 41406.34   | 190714.85  | 89503.27   | 41055.05   | 195036.35  |
| 568.74     | 27266.78   | 7227.71    | 708.86     | 7799.80    | 16114.40   | 20424.06   | 2606.80    | 7352.10    |
| 116514.31  | 537444.67  | 162443.96  | 289301.76  | 128241.80  | 352289.31  | 154770.48  | 129831.76  | 266932.31  |
| 0          | 25         | 0          | 0          | 0          | 0          | 139        | 0          | 5.50       |
| 222051.02  | 651517.33  | 340351.65  | 361026.80  | 269224.20  | 443824.40  | 228248.65  | 239423.38  | 436226.92  |
| 374891.75  | 2244138.66 | 591706.93  | 976699.71  | 519504.66  | 1327562.15 | 566749.93  | 408183.92  | 1258810.87 |
| 4394.64    | 41239.09   | 14559.48   | 48009.70   | 15080.27   | 57005.97   | 19470.21   | 5188.38    | 60490.87   |
| 0          | 0          | 0          | 0          | 0          | 0          | 0          | 0          | 0          |
| 175771.50  | 475742.65  | 195037.45  | 271594.06  | 154002.08  | 291323.40  | 168486.41  | 188060.72  | 310565.27  |
| 27715.29   | 161926.71  | 29787.28   | 119245.80  | 33007.81   | 139149.62  | 59065.69   | 34533.60   | 108017.21  |
| 71008.17   | 271252.43  | 83718.20   | 179982.13  | 66692.11   | 169715.89  | 108949.51  | 74903.62   | 165858.95  |
| 31215.72   | 606030.21  | 117683.85  | 379407.54  | 112037.33  | 502696.46  | 280592.59  | 70127.77   | 394474.97  |
| 96921.15   | 492669.18  | 107110.26  | 598650.22  | 97850.10   | 556062.41  | 293777.01  | 111586.20  | 704458     |
| 0          | 0          | 10         | 0          | 0          | 0          | 6          | 0          | 0          |
| 159        | 1676.67    | 176.33     | 2641       | 211.33     | 3337       | 316.33     | 211        | 780        |



|           |            |            |            |           |            |           |           |            |
|-----------|------------|------------|------------|-----------|------------|-----------|-----------|------------|
| 46486.05  | 438990.63  | 91459.44   | 420179.14  | 77398.99  | 371642.67  | 189756.08 | 66494.32  | 487645.88  |
| 0         | 25         | 2          | 0          | 0         | 0          | 139       | 0         | 13.50      |
| 733       | 3280.32    | 1477.33    | 345.40     | 396.25    | 22591.85   | 2212.27   | 491.15    | 7777.75    |
| 992.06    | 8337.17    | 929.50     | 11820.22   | 1502.39   | 10655.18   | 7035.56   | 1694.34   | 12959.86   |
| 5450.56   | 124769.55  | 6518.78    | 43998.25   | 6670.45   | 48681.95   | 24814.88  | 8094.22   | 93047.83   |
| 99315.39  | 42890.49   | 88121.06   | 65300.50   | 57615.16  | 250353.76  | 11274.56  | 95836.80  | 60092.27   |
| 451.30    | 13366.32   | 1135.82    | 6099       | 555.65    | 25401.30   | 1680.83   | 417.75    | 25784.17   |
| 733356    | 2830211.86 | 1089551.98 | 1429919.65 | 844874.36 | 1646431.35 | 920465.32 | 795942.14 | 1512427.90 |
| 683196.37 | 2399808.50 | 954607.68  | 1517341.73 | 739062.70 | 1689570.63 | 956102.32 | 725593.82 | 1693119.08 |
| 0         | 0          | 2          | 0          | 0         | 0          | 139       | 0         | 8          |
| 40110.98  | 116906.90  | 35093.32   | 18911.76   | 19337.32  | 26140.27   | 4830.46   | 39018.64  | 12706.70   |
| 863       | 1568.33    | 9876.16    | 4727       | 10692.86  | 2608.19    | 2188.38   | 405       | 19711.53   |
| 2777.50   | 23985.90   | 3175.67    | 43484.68   | 4691.31   | 33988.34   | 21500.82  | 4666.18   | 21365.15   |
| 0         | 0          | 0          | 0          | 0         | 0          | 0         | 0         | 0          |
| 38397.21  | 486936.72  | 57664.13   | 228206.84  | 58428.93  | 276253.97  | 145402.32 | 52293.75  | 209411.24  |
| 26986.05  | 254693.95  | 40068.37   | 109008.66  | 32530     | 156756.30  | 51448.36  | 30137.95  | 82205.94   |
| 71902.07  | 410929.75  | 133953.72  | 154105.18  | 112977.04 | 198284.78  | 91446.13  | 79611.41  | 207934.04  |
| 67421.45  | 255685.82  | 109505.25  | 111514.24  | 88527.37  | 143007.54  | 70808.26  | 71533.66  | 145041.07  |
| 0         | 0          | 0          | 0          | 0         | 0          | 0         | 0         | 0          |
| 3001.44   | 51571.10   | 31171.50   | 20674.07   | 31619.45  | 48016.38   | 10620.54  | 3016.02   | 58910.89   |
| 44        | 571        | 36.50      | 141        | 7         | 2023       | 141.50    | 0         | 120.50     |
| 252       | 344688     | 366        | 0          | 108       | 4121       | 232       | 0         | 84         |
| 14626.08  | 316978.17  | 54887.55   | 184709.06  | 58869.52  | 210984.05  | 86853.42  | 19770.72  | 234294.02  |
| 403174.21 | 1867505.06 | 616829.06  | 999644.91  | 484968.93 | 1198210.48 | 567118.97 | 438665.40 | 968137.79  |
| 4031      | 99962.25   | 5317.48    | 46511.10   | 5116.42   | 69449.58   | 23260.19  | 6041.60   | 44130.17   |
| 354192.24 | 1057829.48 | 544966.92  | 587907.83  | 441154.17 | 638307.02  | 420171.02 | 375909.28 | 830330.65  |
| 3244.94   | 98491.05   | 5977.66    | 43984.49   | 3746.73   | 98997.03   | 14888.84  | 6616.49   | 39366.13   |
| 182322.36 | 667109.62  | 288246.94  | 357933.34  | 255885.19 | 412862.98  | 217756.67 | 195352.72 | 419664.87  |
| 437       | 4158.20    | 11823.94   | 3647       | 1151.38   | 64148.90   | 1815.08   | 1046.75   | 3613.71    |
| 72321.33  | 407416.47  | 77026.63   | 242515.21  | 65028.11  | 275229.95  | 104859.25 | 80860.76  | 206710.35  |
| 6141.44   | 126669.92  | 16790.16   | 84727.14   | 18416.95  | 82289.65   | 37406.53  | 10234.04  | 60116.61   |
| 739.42    | 43916.74   | 943.75     | 3973.33    | 394.14    | 15883.43   | 2248.50   | 1148.50   | 1341.56    |
| 44457.58  | 196828.64  | 57620.36   | 80055.83   | 43020.34  | 103297.59  | 49438.10  | 50547.25  | 76374.03   |
| 2779.50   | 23985.90   | 3175.67    | 43484.68   | 4691.31   | 33988.34   | 21500.82  | 4666.18   | 21365.15   |

|            |            |            |            |            |            |            |            |            |
|------------|------------|------------|------------|------------|------------|------------|------------|------------|
| 0          | 25         | 4          | 0          | 2          | 0          | 139        | 538        | 37.50      |
| 114070.51  | 356486.23  | 188925.72  | 218254.40  | 157042.18  | 252482.61  | 146168.87  | 120681.91  | 322109.73  |
| 291168.25  | 771571.40  | 411529.78  | 490405.94  | 329759.03  | 581285.05  | 341692.08  | 314804.33  | 537841.28  |
| 5681.94    | 183656.99  | 6877.41    | 63167.41   | 6303.96    | 127261.19  | 30695.48   | 6924.56    | 54790.93   |
| 21454.17   | 52712.65   | 23339.98   | 30044.78   | 15463.49   | 45111.70   | 20632.45   | 24522.94   | 23417.04   |
| 23098.17   | 101494.42  | 33706.78   | 45141.01   | 27304.34   | 51346.08   | 30122.88   | 24369.70   | 46763.61   |
| 53222.84   | 292807.01  | 30664.94   | 212945.55  | 37767.40   | 221488.36  | 96487.91   | 61784.44   | 231089.26  |
| 3062       | 30242.32   | 3979.67    | 55359.48   | 5516.51    | 50652.77   | 24256.80   | 5140.28    | 28834.18   |
| 0          | 25         | 0          | 0          | 0          | 0          | 139        | 0          | 5.50       |
| 0          | 0          | 0          | 0          | 0          | 0          | 0          | 0          | 0          |
| 235762.71  | 1130870.69 | 391890.47  | 852873.20  | 333159.12  | 844837.43  | 492001.40  | 270310.12  | 1025762.20 |
| 6825.36    | 103708.55  | 19259.83   | 105789.51  | 15388.78   | 94154.45   | 57209.92   | 10018.76   | 164019.18  |
| 28119.09   | 123696.21  | 49267.38   | 132147.69  | 44647.47   | 116272.34  | 63824.92   | 33281.80   | 105801.27  |
| 224658.44  | 882367.32  | 298575.46  | 379561.45  | 244745.56  | 479722.44  | 224243.38  | 247768.17  | 486803.25  |
| 25651.59   | 198977.05  | 37031.30   | 85743.07   | 30617.79   | 98081.13   | 44275.48   | 27082.76   | 86884.18   |
| 89033.78   | 1094833.75 | 140955.58  | 734564.06  | 124582.21  | 822140.67  | 354505.60  | 127705.95  | 702209.75  |
| 781064.65  | 3206014.66 | 1019532.91 | 2028319.54 | 809635.39  | 2192782.70 | 1103126.98 | 816925.80  | 1839459.06 |
| 23165.61   | 143347.78  | 48309.10   | 51658.21   | 31510.84   | 70778.72   | 39488.04   | 27063.18   | 62933.14   |
| 289365.80  | 1369980.02 | 414736.14  | 675250.08  | 333371.49  | 859964.14  | 406664.83  | 321014.99  | 839353.84  |
| 76842.15   | 287890.15  | 105154     | 297903.28  | 86233.01   | 250040.31  | 148325.53  | 80726.53   | 373377.39  |
| 23459.03   | 80191.21   | 28077.31   | 64636.10   | 28662.44   | 68623.75   | 35362.82   | 26403.85   | 92941.54   |
| 21834.17   | 55133.57   | 32673.64   | 29997.85   | 25453.66   | 41526.74   | 20423.87   | 23049.74   | 36482.21   |
| 122732.73  | 789418.29  | 165187.55  | 415062.11  | 129266.77  | 561062.61  | 195178.48  | 150631.48  | 416869.61  |
| 6          | 249.50     | 14         | 296        | 0          | 2          | 69         | 34         | 58         |
| 0          | 0          | 4          | 0          | 2          | 0          | 0          | 538        | 32         |
| 1272749.22 | 5543343.69 | 1647189.72 | 3253850.32 | 1405700.89 | 3239718.05 | 1797775.66 | 1444530.55 | 3776998.47 |
| 6846.88    | 108419.24  | 7185.92    | 95710.36   | 11662.71   | 103754.32  | 49881.94   | 8060.86    | 128273.55  |
| 19291.67   | 619.27     | 6072.42    | 7612.66    | 8764.29    | 810.58     | 601.66     | 19421      | 14823.54   |
| 1822.50    | 51717.75   | 11344.50   | 21390.39   | 11891.18   | 19763.93   | 8347.32    | 2684.34    | 27465.57   |
| 58174.94   | 264036.22  | 62994.12   | 297811.12  | 65627      | 281031     | 120411.58  | 71377.06   | 326403.35  |
| 1827.46    | 23599.05   | 1754.80    | 45674.52   | 2744.91    | 28204.68   | 17067.44   | 3051.32    | 6100.76    |
| 1139457.30 | 2918503.10 | 1726092.91 | 1582570.92 | 1343057.79 | 1851219.97 | 1089697.54 | 1204885.88 | 1934393.87 |
| 0          | 0          | 2          | 0          | 0          | 0          | 0          | 0          | 8          |
| 6708.02    | 263007.25  | 32380.12   | 70876      | 20585.75   | 113704.65  | 38559.76   | 10610.05   | 83406.82   |

|            |            |            |            |            |            |            |            |            |
|------------|------------|------------|------------|------------|------------|------------|------------|------------|
| 270722.98  | 868214.02  | 462085.68  | 471087.94  | 362687.89  | 538511.55  | 334004.90  | 293202.32  | 551719.56  |
| 84         | 931.25     | 162.33     | 2613       | 119.33     | 340        | 287        | 204        | 596        |
| 571661.74  | 1469961.25 | 809278.39  | 837940.90  | 634956.05  | 1002373.10 | 555443.01  | 604997.05  | 942260     |
| 63         | 874        | 73.50      | 148        | 31         | 2029       | 42.33      | 28         | 290        |
| 0          | 24.17      | 0          | 0          | 0          | 0          | 4          | 0          | 5.50       |
| 178500.36  | 1965682.42 | 266019.96  | 261728.47  | 207767.57  | 334939.15  | 178027.02  | 188926.53  | 308628.01  |
| 0          | 0          | 2          | 0          | 0          | 0          | 0          | 0          | 8          |
| 840        | 4133.32    | 1763.83    | 975.40     | 617.25     | 22908.85   | 2742.10    | 568.15     | 30916.75   |
| 2777.50    | 23985.90   | 3175.67    | 43484.68   | 4691.31    | 33988.34   | 21500.82   | 4666.18    | 21365.15   |
| 3169.56    | 72027.99   | 8878.83    | 58700.31   | 5257.21    | 72316.85   | 19950.42   | 7597.08    | 44626.18   |
| 13         | 493.91     | 78.66      | 16         | 92.66      | 16         | 194        | 67         | 6705       |
| 215.50     | 2215.42    | 870        | 3194.80    | 185        | 24084.20   | 1233.58    | 925.85     | 1189       |
| 51964.88   | 206578.53  | 61411.87   | 177548.34  | 54840.49   | 193273.32  | 96564.40   | 61689.32   | 304084.66  |
| 205631.58  | 1375083.84 | 360094.14  | 671563.46  | 302755.39  | 788526.55  | 367171.67  | 236760.90  | 766167.66  |
| 193214.59  | 1201839.37 | 298579.89  | 705168.79  | 256138.88  | 909909.80  | 378575.55  | 214985.71  | 907445.26  |
| 241334.94  | 2234594.56 | 430586.22  | 1156898.49 | 382398.75  | 1298213.59 | 563390.45  | 299213.31  | 1048671.37 |
| 846.44     | 11827.41   | 10049.75   | 4216       | 10235.04   | 12639.43   | 1671.33    | 1533       | 17240.21   |
| 700118.25  | 1493926.87 | 914628.67  | 727674.66  | 680461.55  | 1061976.12 | 539218.02  | 722290.09  | 998508.40  |
| 190734.13  | 1377865.10 | 353104.90  | 681805.97  | 307922.35  | 852336.82  | 370045.25  | 211364.09  | 815746.72  |
| 86465.96   | 202258.58  | 61312.49   | 128917.69  | 58316.32   | 185744.83  | 76307.42   | 89775.26   | 51734.73   |
| 27827.15   | 102315.49  | 33034.45   | 117212.27  | 30868.29   | 119583.48  | 48090.82   | 32836.77   | 179539.38  |
| 1450904.37 | 5669256.07 | 2031817.21 | 3041547.41 | 1598688.26 | 3631868.59 | 1870051.04 | 1575396.37 | 3199201.85 |
| 1105545.28 | 3191076.54 | 1597955.41 | 1748900.40 | 1247327.68 | 2044714.17 | 1137791.83 | 1184106.03 | 2002882.66 |
| 1017.06    | 10867.92   | 1316.50    | 19211.22   | 1664.84    | 12709.36   | 7345.98    | 1176.09    | 3753.49    |
| 1311.44    | 16761.56   | 1101.15    | 13791.34   | 1769.36    | 14970.34   | 9276.09    | 2055.34    | 2983.37    |
| 59         | 541        | 54.75      | 0          | 68         | 1688       | 8.33       | 0          | 63         |
| 99398.97   | 16205.17   | 106091.71  | 49182.17   | 72729.60   | 10385.12   | 69419.85   | 101588.31  | 54262.19   |
| 80021.45   | 441000.74  | 98451.52   | 276987.23  | 80699.63   | 391382.76  | 134847.53  | 97011.05   | 356717     |
| 0          | 0          | 0          | 0          | 0          | 0          | 0          | 0          | 2          |
| 22761.97   | 56296.76   | 17666.49   | 52120.60   | 14135.20   | 62473.62   | 23008.24   | 23878.15   | 80391.25   |
| 20638.22   | 681587.37  | 90272.59   | 229303.14  | 97083.87   | 309642.95  | 124812.77  | 30374.67   | 269419.73  |
| 129        | 925.44     | 170.17     | 1793       | 179.53     | 2907.43    | 1315.23    | 151        | 7106.87    |
| 0          | 0          | 4          | 0          | 2          | 0          | 0          | 538        | 32         |
| 42534.94   | 45138.45   | 58459.53   | 32614.64   | 40444.15   | 158364.93  | 9648.76    | 40046.87   | 78739.97   |

|           |            |            |            |            |            |           |            |            |
|-----------|------------|------------|------------|------------|------------|-----------|------------|------------|
| 144923.64 | 812458.11  | 187168.06  | 449686.09  | 161555.15  | 465160.35  | 217439.64 | 164488.75  | 421390.65  |
| 2         | 0          | 0          | 0          | 0          | 0          | 0         | 0          | 52         |
| 800.44    | 11307.24   | 10155.58   | 6799       | 10243.37   | 9653       | 1860.50   | 1720       | 17676.21   |
| 2         | 5          | 2.50       | 3          | 0          | 0          | 64        | 0          | 69         |
| 2027.56   | 16891.46   | 3071       | 19921.36   | 2415.55    | 33492.11   | 7953.24   | 2804.54    | 29462.29   |
| 202831.29 | 525589.18  | 326134.93  | 359739.43  | 267145.63  | 371685.49  | 221300.61 | 219154.45  | 444002.64  |
| 439496.04 | 1100511.82 | 665476.66  | 633090.50  | 521715.19  | 783525.36  | 420570.93 | 464851.26  | 778857.45  |
| 47690.86  | 216645.76  | 67961.51   | 133478.55  | 52738.22   | 139171.81  | 55618.94  | 51807.73   | 109277.42  |
| 343668.95 | 1131197.33 | 501832.21  | 702781.72  | 413663.99  | 836533.27  | 438967.36 | 381609.97  | 886234.73  |
| 265360.66 | 745781.51  | 333890.29  | 502877.25  | 254653.27  | 469371.08  | 296542.04 | 292138.17  | 468987.49  |
| 48259.26  | 227071.95  | 62048.19   | 150812.64  | 49458.08   | 158736.29  | 80689.78  | 58097.97   | 206385.92  |
| 645472.12 | 2338556.67 | 929479.54  | 1338624.58 | 727593.33  | 1577446.11 | 804170.84 | 691266.42  | 1434472.86 |
| 8         | 69         | 0          | 0          | 0          | 3          | 2         | 0          | 0          |
| 23533.61  | 172481.64  | 43284.31   | 54288.10   | 37104.67   | 73264.88   | 29823.01  | 25672.68   | 72361.19   |
| 20120.23  | 6355.76    | 16233.90   | 15506.28   | 19295.60   | 12275.43   | 2563.68   | 20246.22   | 24550.49   |
| 588073.84 | 1898776.27 | 879681.51  | 1047111.55 | 695745.68  | 1285636.92 | 698415.21 | 637646.80  | 1205539.13 |
| 23785.31  | 83930.42   | 48180.65   | 59229.42   | 32718.41   | 92739.60   | 44356.28  | 27787.30   | 95188.45   |
| 143348.46 | 729130.80  | 216657.40  | 332816.09  | 169583.50  | 460184.60  | 197827.87 | 159248.17  | 351104.45  |
| 442515.27 | 1750769.76 | 649145.64  | 1021501.27 | 512613.72  | 1109571.52 | 624702.77 | 487524.76  | 1171937.83 |
| 71170.37  | 389077.19  | 107185.51  | 163038.60  | 88820.94   | 171435.90  | 111410.24 | 77597.10   | 160794.04  |
| 1874      | 15155      | 2208.64    | 25119.34   | 3865.76    | 15254.29   | 13974.89  | 5219.84    | 34432.76   |
| 54598.58  | 343565.49  | 110906.16  | 223368.29  | 99449.54   | 275960.60  | 120015.79 | 65866.44   | 321151.79  |
| 952911.02 | 2272275.15 | 1322153.71 | 1262471.17 | 1017524.26 | 1469154.15 | 885546.12 | 1009549.42 | 1465644.93 |
| 40151.90  | 785132.65  | 56483.36   | 794723.13  | 64234.13   | 631325.38  | 295503.93 | 65889.63   | 443780.49  |
| 1786.86   | 18652.14   | 24677.78   | 6358.62    | 2522.75    | 102165.59  | 5808.17   | 2063.12    | 9116.03    |
| 30637.49  | 292443.15  | 37339.38   | 191866.13  | 40433.56   | 185155.75  | 85086.44  | 39874.71   | 193234.19  |
| 27803.95  | 195289.86  | 39588.02   | 153791.11  | 35712.98   | 124260.30  | 68977.11  | 35529.24   | 104563.04  |
| 60023.75  | 54168.43   | 66845.72   | 28195.60   | 52552.99   | 28448.42   | 15440.05  | 57843.02   | 71001.15   |
| 209649.47 | 752420.10  | 299174.97  | 450891.85  | 243549.40  | 488379.56  | 255270.84 | 224945.64  | 489097.09  |
| 28104.90  | 864096.51  | 114293.44  | 365079.27  | 64907.27   | 541149.15  | 232987.03 | 55695.02   | 273576.32  |
| 33745.41  | 245425.63  | 79840.09   | 167273.90  | 76709      | 217557.32  | 81432.83  | 33806.63   | 256904.66  |
| 15        | 0          | 0          | 0          | 49         | 6          | 8.33      | 0          | 7          |
| 85613.67  | 462190.23  | 112421.57  | 400441.43  | 108543.42  | 407430.62  | 210232.73 | 102165.96  | 467728.94  |
| 24364.67  | 143916.01  | 54172.12   | 40327.29   | 46900.88   | 80595.39   | 25829.39  | 27221.63   | 92609.91   |

|           |            |            |            |           |            |            |           |            |
|-----------|------------|------------|------------|-----------|------------|------------|-----------|------------|
| 0         | 0          | 0          | 0          | 0         | 0          | 139        | 0         | 0          |
| 2298.94   | 47529.82   | 3295.92    | 40792.61   | 3492.55   | 38910.69   | 16006.46   | 3224.93   | 21412.91   |
| 39766.14  | 20281.66   | 37528.57   | 30465.59   | 24269.59  | 18634.53   | 17342.58   | 39186.07  | 30202.65   |
| 1506.56   | 72651.13   | 10743.57   | 22588.29   | 11540.97  | 18680.79   | 8288.09    | 1353.14   | 24749.79   |
| 7235.88   | 109500.82  | 8610.83    | 104260.69  | 12174.04  | 98194.76   | 51615.44   | 10258.36  | 166427.06  |
| 98735.76  | 659513.76  | 170102.33  | 251562.96  | 144681.05 | 285986.53  | 138028.46  | 105629.54 | 282857.03  |
| 8662.38   | 201338.39  | 95454.68   | 99553.02   | 56772.30  | 175290.53  | 85125.88   | 20062.35  | 129130.16  |
| 38837.17  | 391426.13  | 40640.35   | 271266.22  | 45663.39  | 306428.29  | 118103.52  | 47719.57  | 315376.27  |
| 400749.22 | 1217716.02 | 574385.46  | 707180.78  | 457410.08 | 824364.59  | 452858.55  | 430689.01 | 775568.47  |
| 1580.94   | 42745.76   | 19781.09   | 3563.33    | 20506.52  | 24220.71   | 2973.62    | 644.75    | 34223.04   |
| 356416.62 | 1068524.70 | 456998.49  | 584669.67  | 359732.17 | 677816.40  | 335840.11  | 384648.49 | 778949.49  |
| 233450.93 | 517324.42  | 237688.88  | 286783.73  | 216952.04 | 323777.48  | 140754.99  | 236155.12 | 323923.48  |
| 31930.29  | 298821.09  | 80855.21   | 156257.87  | 76499.26  | 192111.64  | 71255.91   | 37756.96  | 178253.78  |
| 142305.19 | 95930.69   | 117697.64  | 136506.07  | 97006.68  | 145796.55  | 78226.23   | 142211.32 | 140752.98  |
| 3085.44   | 97323.86   | 21661.35   | 32601.56   | 22856.72  | 49526.29   | 14658.31   | 3094.51   | 57649.44   |
| 2769.60   | 90674.66   | 3674.57    | 51082.66   | 5084.78   | 42526.66   | 20665.30   | 5044.02   | 54323.78   |
| 2307.94   | 53969.39   | 26638.64   | 23023.67   | 16601.55  | 36205.98   | 21298.16   | 5360.67   | 35137.14   |
| 1119      | 48585.65   | 1389.31    | 22612.89   | 1612.01   | 18200.86   | 7625.04    | 1873.14   | 9855.85    |
| 274839.19 | 1696680.91 | 386291.97  | 803279.47  | 308223.06 | 1047314.92 | 462456.68  | 321581.03 | 976363.05  |
| 2517.78   | 31291.24   | 3620       | 54577.01   | 4093.98   | 38828      | 19696.49   | 5004.51   | 30455.99   |
| 145128.52 | 738130.93  | 238694.07  | 385509.12  | 184168.12 | 434245.42  | 213215.33  | 153710.01 | 425959.16  |
| 6831.80   | 85687.93   | 7949.64    | 93999.80   | 10601.48  | 88451.87   | 45074.75   | 11845.20  | 145504.48  |
| 284126.14 | 1326464.28 | 477040.73  | 601794.55  | 365308.90 | 878081.53  | 388271.96  | 317860.23 | 758062.39  |
| 434560.12 | 1050318.83 | 601913.62  | 660814.60  | 509448.08 | 733407.32  | 431730.70  | 462562.54 | 830692.48  |
| 640.80    | 13400.60   | 12390.12   | 8980       | 1278.58   | 85509.53   | 2470.11    | 1323.55   | 4599.01    |
| 44        | 212        | 38         | 3          | 87        | 3          | 159.33     | 0         | 196        |
| 356451.08 | 1194004.63 | 507297.68  | 631174.67  | 405018.91 | 720079.34  | 374952.13  | 380294.48 | 829855.94  |
| 755170.05 | 3485071.51 | 890112.30  | 2538716.45 | 824198.26 | 2375743.60 | 1263169.74 | 821649.88 | 2118298.34 |
| 5295.28   | 55341.64   | 6795.67    | 98077.69   | 8785.29   | 72832.34   | 41291.31   | 9719.69   | 51917.14   |
| 48281     | 249521.63  | 77734.84   | 122215.33  | 61446.21  | 152640.43  | 78592.91   | 52276.72  | 162499.75  |
| 23390.61  | 104332.65  | 43757.23   | 50446.12   | 36804.70  | 60524.64   | 27913.69   | 24111.61  | 62420.75   |
| 1225      | 156657.71  | 2292.48    | 19157.32   | 2385.65   | 19974.29   | 8115.30    | 5665.67   | 19422.62   |
| 782940.10 | 1922680.76 | 1120251.88 | 1135192.87 | 856699.52 | 1214281.80 | 736203.27  | 823813.25 | 1242182.13 |
| 63817.95  | 177390.50  | 80159.71   | 71078.34   | 59346.54  | 81316.84   | 42541.55   | 63351.96  | 87268.19   |

|           |            |           |           |           |           |           |           |           |
|-----------|------------|-----------|-----------|-----------|-----------|-----------|-----------|-----------|
| 548509.05 | 1415617.44 | 824900.53 | 780091.45 | 641566.97 | 872668.36 | 529682.15 | 578453.18 | 957377.65 |
| 106923.41 | 249668.84  | 150556.21 | 129262.11 | 115288.68 | 133413.75 | 93174.37  | 111165.63 | 153790.66 |
| 3331.20   | 97867.54   | 48292     | 9596.70   | 50003.55  | 36872.43  | 6673.35   | 2299.07   | 82373.42  |
| 42102.78  | 165334.73  | 44688.62  | 39913.49  | 29625.55  | 46713.78  | 32684.81  | 43449.66  | 40726.97  |
| 2777.50   | 23987.40   | 3175.67   | 43484.68  | 4691.31   | 33988.34  | 21500.82  | 4666.18   | 21365.15  |
| 2184      | 18490      | 2085.08   | 28717.34  | 3383.65   | 26747.34  | 15647.09  | 2621.01   | 62228.08  |
| 22492.11  | 84326.91   | 24667.70  | 47664.39  | 16771.27  | 60872.12  | 26731.13  | 24351.45  | 29597.23  |
| 348915.40 | 784907.59  | 496580.53 | 498702.01 | 394257.17 | 559346.53 | 325325.70 | 369042.28 | 565387.87 |
| 60003.54  | 355682.80  | 112253.12 | 212945.37 | 90946.70  | 279371.18 | 124829.81 | 67203.01  | 255966.65 |
| 266786.67 | 1151895.72 | 393574.75 | 749620.14 | 328226.94 | 773237.87 | 409175.03 | 296513.79 | 758026.53 |
| 0         | 0          | 0         | 0         | 0         | 0         | 0         | 0         | 0         |
| 205234.06 | 1115804.60 | 246827.22 | 803451.33 | 208030.93 | 926400.19 | 379362.59 | 237089.36 | 625883    |
| 19711.61  | 18835.95   | 20341.14  | 11439.05  | 13377.60  | 14640.66  | 11162.56  | 21077.87  | 8651.14   |
| 959.50    | 33742.42   | 10554.33  | 14474     | 10887.99  | 8185.33   | 2615.83   | 1439      | 29819.33  |
| 70627.39  | 328397.49  | 100365.93 | 178381.88 | 78713.96  | 238069.20 | 103545.75 | 80328.70  | 250313.92 |
| 0         | 24.17      | 0         | 0         | 0         | 0         | 4         | 0         | 5.50      |
| 0         | 25         | 0         | 0         | 0         | 0         | 139       | 0         | 5.50      |
| 20190.47  | 13994.75   | 20720.05  | 10789.91  | 13708.73  | 8092.97   | 11754.47  | 20201.50  | 17321.99  |
| 32357.55  | 149319.59  | 43864.32  | 220356.53 | 34126.57  | 167531.77 | 99820.40  | 41405.83  | 187821.06 |
| 7187.30   | 91114.46   | 45464.51  | 78092.87  | 47760.01  | 118437.81 | 40950.33  | 8125.44   | 140064.56 |
| 0         | 25         | 0         | 0         | 0         | 0         | 139       | 0         | 5.50      |
| 27259.61  | 128387.02  | 52681.34  | 100809.06 | 45837.17  | 131523.64 | 62155.97  | 35248.71  | 116259.74 |
| 0         | 49.17      | 0         | 0         | 0         | 0         | 4         | 0         | 11        |
| 25935.01  | 183996.43  | 28042.06  | 86672.45  | 21971.18  | 111153.96 | 52228.04  | 29271.16  | 95627.46  |
| 157116.55 | 513423.63  | 216599.89 | 298214.82 | 165002.09 | 348052.33 | 178196.17 | 170844.37 | 307482.87 |
| 5295.38   | 112951.93  | 16474.64  | 78301.32  | 16346.33  | 98442.84  | 30130.76  | 8597.77   | 58414.83  |
| 2996.80   | 55016.42   | 4450.72   | 36557.58  | 3986.68   | 63076.82  | 16943.90  | 7038.08   | 43841.24  |
| 1541.44   | 50942.10   | 2269.99   | 19852.07  | 1834.46   | 28537.38  | 7554.39   | 2883.52   | 11280.39  |
| 24008.17  | 90581.92   | 18869.31  | 83286.07  | 19715.23  | 72237.85  | 39312.54  | 27246.37  | 61100.25  |
| 56444.67  | 719166.70  | 63333.39  | 765215.40 | 69822.82  | 560905.62 | 269795.65 | 85824.68  | 535172.24 |
| 159503.27 | 465960.67  | 271720.55 | 276918.30 | 215652.24 | 323029.45 | 178348.37 | 171807.81 | 372696.77 |
| 14581.54  | 188233.37  | 18068.42  | 229204.64 | 22068.68  | 224266.49 | 96835.83  | 20368.08  | 191327.37 |
| 20000.92  | 617975.93  | 27908.01  | 287230.26 | 25681.62  | 391976.42 | 121847.45 | 34831.46  | 174870.88 |
| 374327.23 | 1024976.88 | 537890.70 | 566146.54 | 409939.83 | 634481.26 | 377344.35 | 401001.88 | 622977.75 |

|           |            |           |            |           |            |           |           |            |
|-----------|------------|-----------|------------|-----------|------------|-----------|-----------|------------|
| 36536.35  | 181573.48  | 63653.52  | 181978.92  | 54536.36  | 126406.47  | 99270.05  | 44205.61  | 85554.15   |
| 183.50    | 30559.34   | 382       | 64         | 210.20    | 4845.43    | 668.73    | 187       | 7431.20    |
| 2777.50   | 23985.90   | 3175.67   | 43484.68   | 4691.31   | 33988.34   | 21500.82  | 4666.18   | 21365.15   |
| 0         | 0          | 2         | 0          | 0         | 0          | 0         | 0         | 8          |
| 383376.55 | 1360150.41 | 558539.99 | 714179.17  | 430313.77 | 794358.34  | 431924.97 | 411201.37 | 716228.08  |
| 121.30    | 8507.25    | 132       | 802        | 23        | 2727       | 251.05    | 69.80     | 422.10     |
| 488909.81 | 1056242.48 | 653183.89 | 593635.09  | 502380.83 | 610791.68  | 442789.53 | 514339.65 | 703449.72  |
| 62562.92  | 540667.91  | 110379.93 | 336585.02  | 100196.25 | 399432.44  | 168803.73 | 78133.36  | 356698.02  |
| 185966.12 | 758898.07  | 314837.08 | 365824.07  | 259828.01 | 456761.41  | 227895.45 | 201841.27 | 460525.08  |
| 472035.99 | 594468.86  | 486238.37 | 365653.62  | 332779.88 | 535205.74  | 199345.84 | 470567.05 | 398473.88  |
| 19        | 318        | 32        | 7          | 24        | 6          | 39.83     | 28        | 106        |
| 4642.94   | 93754.55   | 5774.65   | 83043.90   | 7414.56   | 72296.73   | 33155.06  | 9099.82   | 65996.92   |
| 4668.22   | 169690.72  | 6475.41   | 74948.75   | 6173.22   | 82298.53   | 29650.57  | 6899.48   | 46279.12   |
| 225764.56 | 681211.99  | 325089.40 | 402235.77  | 257336.91 | 451299.94  | 257487.60 | 251611.97 | 402262.81  |
| 1541.44   | 50942.10   | 2269.99   | 19852.07   | 1834.46   | 28537.38   | 7554.39   | 2883.52   | 11280.39   |
| 257384.50 | 1393328.52 | 440012.54 | 862863.08  | 366369.90 | 1033975.96 | 463727.82 | 299788.91 | 904896.52  |
| 267025.54 | 1028246.14 | 304861.46 | 536137.36  | 282707.06 | 520121.47  | 311394.72 | 275553.64 | 504197.95  |
| 33400.85  | 328666.13  | 65504.37  | 199363.80  | 54963.45  | 190650.57  | 102887.05 | 39463.67  | 153139.40  |
| 582374.94 | 2731948.57 | 900009.77 | 1602715.26 | 722354.49 | 1856175.63 | 836784.06 | 641069.60 | 1595451.84 |
| 43292.26  | 110730.17  | 45669.28  | 66749.38   | 32395.43  | 68925.70   | 46584.14  | 44098.40  | 96253.05   |
| 104016.29 | 169190.29  | 113917.58 | 96369.16   | 88503.76  | 90638.24   | 71205.08  | 105988.32 | 114598.31  |
| 243346.07 | 740306.12  | 354350.59 | 374128.81  | 275010.95 | 437168.49  | 245248.77 | 258085.38 | 435108.14  |
| 330       | 61482.17   | 516.84    | 45         | 438       | 5061       | 911.99    | 65.50     | 20374      |
| 23755.27  | 88698.67   | 43294.15  | 42470.79   | 37168.98  | 61067.41   | 30356.48  | 24518.28  | 68015.20   |
| 2812.42   | 20859.62   | 12607.13  | 40253.34   | 14527.33  | 26694.76   | 16255.62  | 4046.84   | 93743.20   |
| 114378.22 | 2488913.84 | 198362.39 | 2112479.73 | 216147.55 | 1758765.56 | 819947.36 | 167627.64 | 1178397.90 |
| 621       | 6716.33    | 659.67    | 10763.67   | 835.33    | 8648.67    | 4257.33   | 633.67    | 1759.33    |
| 76115.22  | 549322.20  | 125775.42 | 529895.33  | 119793.68 | 553549.35  | 257996.95 | 94243.93  | 638555.07  |
| 206104.29 | 673032.06  | 320365.23 | 400623.79  | 258071.58 | 449578.98  | 230980.57 | 219083.15 | 466087.06  |
| 0         | 25         | 0         | 0          | 0         | 0          | 139       | 0         | 5.50       |
| 23        | 191        | 97        | 0          | 36        | 0          | 10        | 0         | 7          |
| 122733.22 | 1759888.02 | 233565.35 | 614036.25  | 229774.68 | 716197.55  | 253659.82 | 153359.21 | 625819.80  |
| 0         | 25         | 0         | 0          | 0         | 0          | 139       | 0         | 5.50       |
| 0         | 25         | 0         | 0          | 0         | 0          | 0         | 0         | 5.50       |

|           |            |           |           |           |           |           |           |            |
|-----------|------------|-----------|-----------|-----------|-----------|-----------|-----------|------------|
| 88914.64  | 280210.28  | 108833.46 | 150493.88 | 101105.41 | 210492.23 | 115824.05 | 98584.59  | 162704.75  |
| 177018.36 | 1569568.75 | 263852.05 | 243613.58 | 205775.56 | 309639.22 | 169984.46 | 186908.69 | 297634.51  |
| 325687.77 | 783763.34  | 476757.05 | 332902.79 | 368882.98 | 477607.01 | 284860.53 | 337638.85 | 551790.26  |
| 176       | 2164       | 128       | 0         | 0         | 6728      | 0         | 0         | 32         |
| 72383.39  | 386738.85  | 164785.38 | 179881.02 | 103024.55 | 291115.93 | 143161.81 | 91558.75  | 212793.97  |
| 473264.55 | 1436706.33 | 775008.03 | 795906.17 | 614540.25 | 950575.84 | 572404.33 | 511643.18 | 1168342.54 |
| 359544.34 | 1383014.45 | 422584.16 | 601786.60 | 349382.54 | 779308.07 | 393830.59 | 380607.51 | 585028.62  |
| 25924.14  | 501431.83  | 57257.73  | 373849.79 | 56756.53  | 401533.75 | 193936.76 | 42177.38  | 547548.48  |
| 254894.60 | 1296747.82 | 424958.74 | 779089.89 | 341443.52 | 938502.52 | 447550.39 | 277608.44 | 863174.98  |
| 65755.79  | 235850.98  | 70850.42  | 98380.59  | 47784.06  | 139856.05 | 69787.99  | 68954.78  | 75920.79   |
| 452459.28 | 505315.51  | 520709.23 | 276752.36 | 383759.83 | 245907.03 | 232520.51 | 445117.23 | 395110.92  |
| 39638.14  | 17844.09   | 25495.71  | 30131.82  | 19053.29  | 107100.21 | 4487.59   | 38833.10  | 24885.73   |
| 0         | 0          | 0         | 0         | 0         | 0         | 0         | 0         | 0          |
| 101146.83 | 647627.86  | 165546.29 | 691933.80 | 148033.55 | 657311.46 | 318636.95 | 135698.58 | 703827.86  |
| 85018.30  | 219856.97  | 90447.14  | 124690.62 | 61978.35  | 106954.95 | 80226.85  | 92069.85  | 105325.49  |
| 68317.13  | 192114.12  | 71277.69  | 180354.80 | 59547.03  | 182313.01 | 82208.31  | 73996.81  | 204026.80  |
| 0         | 0          | 0         | 0         | 0         | 0         | 0         | 0         | 0          |
| 0         | 25         | 0         | 0         | 0         | 0         | 0         | 0         | 5.50       |
| 208434.32 | 997884.09  | 315169.43 | 735938.90 | 249444.13 | 789559    | 401144    | 236711.84 | 806990.21  |
| 0         | 63         | 10        | 11        | 0         | 322.50    | 186.50    | 22.50     | 44.50      |
| 21690.81  | 59441.55   | 23049.08  | 39506.99  | 16082.04  | 37832.51  | 24761.33  | 23952.21  | 28323.92   |



| C7         | C8         | C9         | D1         | D10        | D11        | D12        | D13        | D14        |
|------------|------------|------------|------------|------------|------------|------------|------------|------------|
| 0          | 0          | 0          | 0          | 2.40       | 0          | 0          | 0          | 0          |
| 417505.04  | 605372.14  | 714742.17  | 369821.42  | 267769.41  | 246975.90  | 754332.26  | 756416.66  | 698611.64  |
| 2076040.04 | 2049528.86 | 2317724.81 | 1750608.72 | 1461722.25 | 1372625.83 | 3757049.54 | 2788565.18 | 2316874.28 |
| 461620.74  | 490470.41  | 552251.81  | 357847.94  | 274425.75  | 256629.10  | 892945.21  | 590765.68  | 539597.93  |
| 34006.46   | 41134.76   | 52774.13   | 32541.91   | 24671.12   | 23056.81   | 57564.45   | 66162.72   | 51996.21   |
| 10534.77   | 21090.18   | 24712.15   | 15611.93   | 22650.79   | 22022.85   | 2677.44    | 27513.93   | 22352.90   |
| 188857.96  | 164207.20  | 180827.83  | 153025.05  | 142885.96  | 134551.01  | 335142.89  | 209380.04  | 191316.61  |
| 5          | 0          | 0          | 0          | 0          | 0          | 0          | 0          | 0          |
| 4592964.88 | 5615264.48 | 6695082.45 | 3867329.00 | 3691031.09 | 3446633.36 | 7052219.80 | 6669826.03 | 6117043.74 |
| 50534.11   | 38081.87   | 56783.24   | 51205.24   | 67454.94   | 64558.94   | 58831.07   | 52799.13   | 47933.21   |
| 85136.63   | 237282.74  | 283887.78  | 89164.63   | 58165.46   | 53926.80   | 129693.85  | 257659.16  | 279089.10  |
| 578272.07  | 654369.26  | 748217.01  | 338302.96  | 137731.96  | 122148.70  | 1377162.42 | 772022.48  | 738337.18  |
| 6261.18    | 59355.68   | 73545.34   | 12244.16   | 2402       | 2414.66    | 5112.34    | 46346.36   | 64447.02   |
| 22167.71   | 63266.09   | 72693.15   | 27353.05   | 25205.21   | 23336.59   | 6626.15    | 63302.68   | 81495.89   |
| 583        | 847        | 5435       | 134        | 112        | 62         | 187        | 2760       | 1756       |
| 2819.10    | 21055.51   | 24656.82   | 5819.01    | 1934.46    | 1465.19    | 2549.77    | 27513.93   | 22082.90   |
| 374349.59  | 374071.37  | 421138.12  | 376724.21  | 325680.68  | 294630.11  | 581545.13  | 531198.07  | 454426.50  |
| 216705.19  | 251869.64  | 311108.13  | 190230.08  | 148194.91  | 138643.76  | 344486.17  | 326984.74  | 310210.13  |
| 68158.39   | 232257.48  | 263728.67  | 63290.48   | 33867.62   | 31181.69   | 73931.87   | 250133.94  | 270169.42  |
| 14975      | 1466.14    | 741        | 5554.66    | 729.15     | 203.26     | 513.90     | 5348.64    | 947.80     |
| 253504.08  | 270304.13  | 312184.44  | 158080.70  | 128727.38  | 119929.85  | 554394.93  | 349650.74  | 301790.82  |
| 5          | 0          | 0          | 0          | 0          | 0          | 0          | 0          | 0          |
| 313153.08  | 327512     | 356194.99  | 288581.23  | 242126.81  | 228166.87  | 562634.88  | 455436.75  | 364578.77  |
| 1430433.56 | 986563.70  | 1102428.30 | 597722.40  | 419935.58  | 378093.36  | 3001201.07 | 1383961.24 | 1096494.36 |
| 7266.11    | 74365.13   | 59570.32   | 19577.35   | 3776.83    | 2374.66    | 5783.21    | 60419.82   | 104775.15  |
| 0          | 0          | 0          | 0          | 0          | 0          | 0          | 0          | 0          |
| 376746.07  | 232931.59  | 275069.21  | 189480.96  | 192771.53  | 181970.65  | 763980.36  | 345978.43  | 291750.72  |
| 70985.44   | 142694.68  | 155196.39  | 49915.22   | 31295.46   | 27868      | 118743.47  | 136168.21  | 161535.65  |
| 88394.80   | 192472.77  | 269980.86  | 91374.92   | 75884.65   | 71929.93   | 126957.65  | 216135.63  | 227911.32  |
| 371088.32  | 454318.78  | 518080.74  | 165091.52  | 40260.67   | 28910.19   | 886268.51  | 546677.49  | 501287.28  |
| 211622.71  | 724135.85  | 936279.57  | 183421.72  | 101077.13  | 92970.21   | 227765.21  | 694692.78  | 938315.71  |
| 0          | 0          | 0          | 0          | 4          | 0          | 0          | 0          | 0          |
| 359.50     | 2376.17    | 930        | 629        | 232        | 149.67     | 305        | 2428       | 4318       |

|            |            |            |           |           |           |            |            |            |
|------------|------------|------------|-----------|-----------|-----------|------------|------------|------------|
| 245391.70  | 478843.96  | 523084.46  | 125721.95 | 50064.97  | 44511.22  | 515983.22  | 483443.10  | 568049.78  |
| 5          | 0          | 0          | 0         | 0         | 0         | 2          | 0          | 0          |
| 20742.42   | 1458.67    | 312.15     | 1072.55   | 1276.90   | 428.30    | 53110.36   | 4362.57    | 2213       |
| 22274.02   | 17389.61   | 23495.25   | 3957.02   | 1063.46   | 868.77    | 53989.17   | 15482.46   | 18020.41   |
| 8066.69    | 84562.28   | 82750.87   | 18683.44  | 5723.46   | 3642.93   | 8587.01    | 69621.49   | 130321.40  |
| 40377.87   | 8804.69    | 25273.16   | 66800.50  | 109117.08 | 104294.50 | 5002.74    | 16872.43   | 9128.22    |
| 806.17     | 2553.67    | 1248.67    | 854.41    | 795.20    | 340       | 696.10     | 9048.67    | 16388.40   |
| 1167750.37 | 1382760.52 | 1587042.79 | 973550.87 | 802367.43 | 747937.49 | 2000245.20 | 1807277.62 | 1560531.53 |
| 1223550.96 | 1541427.49 | 1903089.01 | 919491.81 | 755763.76 | 692388.55 | 2290881.15 | 1718889.65 | 1729675.40 |
| 5          | 0          | 0          | 0         | 0         | 0         | 2          | 0          | 0          |
| 16902.18   | 10960.29   | 4421.81    | 25179.03  | 44654.26  | 42285.60  | 2918.69    | 22150.30   | 15539.24   |
| 1365.52    | 7113.60    | 5748.33    | 6585.98   | 397.20    | 126.50    | 472.67     | 8342.80    | 21993.73   |
| 6261.18    | 59355.68   | 73545.34   | 12244.16  | 2402      | 2414.66   | 5112.34    | 46346.36   | 64447.02   |
| 0          | 0          | 0          | 0         | 0         | 0         | 0          | 0          | 109.50     |
| 90119.46   | 257346.08  | 335922.56  | 93067.13  | 43937.38  | 36735.06  | 136492.59  | 313574.15  | 304163.60  |
| 91016.13   | 109756.99  | 129165.11  | 47943.57  | 30794.88  | 28120.09  | 117526.66  | 148624.99  | 136160.83  |
| 150980.48  | 152554.73  | 169172.95  | 117507.67 | 78191.54  | 72222.99  | 279893.34  | 241357.96  | 174596.36  |
| 97220.34   | 98921.17   | 113847.44  | 91291.26  | 73271.33  | 68693.48  | 169608.14  | 154250.95  | 123357.30  |
| 2          | 0          | 0          | 0         | 0         | 0         | 0          | 0          | 0          |
| 3907.45    | 27527.01   | 24861.82   | 24572.66  | 3734.96   | 1636.19   | 3048.77    | 36699.43   | 35845.90   |
| 10         | 61         | 134        | 0         | 3         | 0.83      | 8          | 2          | 0          |
| 484.50     | 170        | 1033       | 1538      | 1995.50   | 1122      | 1683.50    | 78776      | 60         |
| 88571.64   | 222521.42  | 288184.48  | 72527.69  | 14996.92  | 11099.18  | 179671.36  | 243627.30  | 274982.91  |
| 567475.93  | 973987.70  | 1162501.38 | 577661.92 | 438503.22 | 410758.33 | 896676.56  | 1237205.68 | 1062019    |
| 7080.35    | 65757.79   | 74089.16   | 15824.62  | 4405.73   | 3353.36   | 6702.80    | 65460.59   | 74289.16   |
| 562296.44  | 578332.39  | 630663.82  | 470313.98 | 386775.33 | 364942.49 | 1059494.29 | 713010.94  | 620549.15  |
| 4521.31    | 29694.28   | 32346.35   | 10909.40  | 5609.90   | 2177.20   | 5470.48    | 40570.23   | 35869.70   |
| 378170.64  | 337645.67  | 389495.52  | 266599.12 | 197299.27 | 187295.89 | 770765.04  | 448771.12  | 387120.55  |
| 498.78     | 1078.67    | 6215.69    | 2297.20   | 607.25    | 406       | 418.73     | 4746.37    | 1399.66    |
| 72046.56   | 217752.99  | 286979.94  | 89926.04  | 78576.61  | 74324.08  | 76237.36   | 267736.21  | 244157.39  |
| 32026.74   | 104078.97  | 124036.66  | 29492.68  | 6170.77   | 5415.24   | 62390.45   | 107541.83  | 111436.89  |
| 8141.11    | 2685.68    | 5824       | 1133.34   | 1348.73   | 447.99    | 1243.01    | 8039.82    | 5681.33    |
| 80359.78   | 78587.42   | 83152.05   | 52538.84  | 49430.37  | 46384.21  | 113760.56  | 114413.84  | 85265.56   |
| 6261.18    | 59355.68   | 73545.34   | 12244.16  | 2402      | 2414.66   | 5112.34    | 46346.36   | 64447.02   |

|            |            |            |            |            |            |            |            |            |
|------------|------------|------------|------------|------------|------------|------------|------------|------------|
| 8          | 0          | 0          | 106.67     | 0          | 0          | 0          | 0          | 0          |
| 227486.06  | 226383.10  | 249487.41  | 168271.45  | 124951.25  | 116447.98  | 443606.69  | 260723.26  | 250214.56  |
| 432017.48  | 480101.78  | 544435.14  | 373544.19  | 318901.23  | 299007.22  | 686401.43  | 586192.82  | 541502.15  |
| 10626.03   | 62291.39   | 101312.99  | 12554.63   | 7219.93    | 3652.27    | 9209.76    | 62223.19   | 71504.99   |
| 31239.42   | 25079.35   | 29463.82   | 21020.56   | 24059.41   | 22406.36   | 56000.67   | 34827.89   | 30391.65   |
| 33931.03   | 47443.96   | 64200.49   | 31472.42   | 24900.89   | 23136.63   | 57915.98   | 63515.61   | 58241.29   |
| 118835.28  | 237355.14  | 306542.40  | 72567.83   | 58110.79   | 53028.90   | 183280.98  | 236274.78  | 276879.98  |
| 7665.93    | 65180.62   | 83962.67   | 13144.55   | 2863.06    | 2935.07    | 5772.54    | 55961.83   | 70080.75   |
| 5          | 0          | 0          | 0          | 0          | 0          | 0          | 0          | 0          |
| 0          | 0          | 0          | 0          | 0          | 0          | 0          | 0          | 0          |
| 507126.73  | 971081.96  | 1124690.72 | 419924.03  | 254192.96  | 234348.21  | 936665.96  | 1006471.48 | 1176425.06 |
| 15942.58   | 141925.81  | 162463.74  | 26860.39   | 6394.58    | 5005.01    | 12132.57   | 127281.73  | 170262.22  |
| 64274.45   | 143746.32  | 171215.49  | 57608.82   | 29277.14   | 28341.36   | 118300.33  | 144899.88  | 149215.80  |
| 338648     | 363441.57  | 409492.99  | 280264.51  | 246891.91  | 229691.46  | 620933.90  | 509628.58  | 408880.08  |
| 38122.88   | 85287.99   | 110290.62  | 41129.05   | 28359.89   | 25623.53   | 62538.10   | 110544.46  | 98007.95   |
| 310914.63  | 837383.11  | 997692.63  | 230347.71  | 101642.70  | 84065.02   | 609269.03  | 848802.46  | 952385.91  |
| 1080825.39 | 2071542.74 | 2544950.08 | 1036716.33 | 851416.99  | 797767.89  | 1746902.28 | 2221962.70 | 2297215.14 |
| 14250.36   | 48645.43   | 62924.37   | 35538.85   | 25912.95   | 23606.42   | 6129.96    | 77100.49   | 56744.45   |
| 541066.16  | 746360.56  | 800490.38  | 414439.88  | 319336.52  | 292742.33  | 975295.38  | 968329.16  | 860011.38  |
| 118265.13  | 341185.20  | 384845.30  | 114005.62  | 81145.47   | 75461.82   | 136908.43  | 326241.58  | 442834.64  |
| 51106.70   | 69425.08   | 77235      | 31851.08   | 25348.23   | 23584.27   | 58791.42   | 84976.05   | 93915.52   |
| 31267.33   | 25913.35   | 27905.15   | 26697.39   | 23759.84   | 22459.82   | 55573.74   | 37794.05   | 28907.48   |
| 181698.55  | 393049.88  | 472950.36  | 170326.17  | 135802.49  | 125500.92  | 252789.83  | 490324.42  | 434607.04  |
| 0          | 5          | 57         | 118        | 15         | 0          | 31         | 2          | 505        |
| 3          | 0          | 0          | 106.67     | 0          | 0          | 0          | 0          | 0          |
| 2398154.89 | 3484496.32 | 4114296.55 | 1727308.10 | 1390000.52 | 1279062.71 | 4140282.09 | 3926879.65 | 3750921.17 |
| 17919.37   | 132501.72  | 187562.32  | 24208.98   | 6275.62    | 4912.91    | 12801.21   | 130861.72  | 174139.98  |
| 7753.34    | 1027.67    | 777.08     | 9898.16    | 20771.11   | 20595.95   | 248.17     | 1054       | 2303.67    |
| 22944.46   | 23667.78   | 25834.50   | 11429.51   | 1834.31    | 1535.39    | 54728.34   | 33681.54   | 24906.97   |
| 224713.03  | 327387.09  | 367368.05  | 103310.58  | 62868.74   | 58985.42   | 450726.27  | 321517.54  | 403176.24  |
| 2269.06    | 35536.42   | 59532.55   | 15710.19   | 3760.18    | 3540.84    | 5897       | 21935.60   | 40469.06   |
| 1731885.13 | 1401594.75 | 1503227.65 | 1407204.28 | 1239821.59 | 1171369.19 | 3155492.59 | 2032140.01 | 1558405.05 |
| 0          | 0          | 0          | 0          | 0          | 0          | 2          | 0          | 0          |
| 36002.87   | 62451.45   | 78262      | 25822.49   | 9960.40    | 5179.35    | 63478.27   | 88608.33   | 80124.70   |

|            |            |            |            |            |            |            |            |            |
|------------|------------|------------|------------|------------|------------|------------|------------|------------|
| 498149.32  | 453299.19  | 497215.61  | 382578.42  | 293605.14  | 277731.55  | 993994.93  | 616006.55  | 498723.73  |
| 139        | 649        | 273        | 348        | 120        | 85         | 168        | 733        | 712        |
| 841754.30  | 740249.10  | 844675.04  | 689651.46  | 622439.03  | 588487.18  | 1506909.81 | 1020345.42 | 826596.99  |
| 28.67      | 719        | 134        | 51.33      | 3          | 4.83       | 25         | 707        | 497        |
| 0          | 0          | 0          | 0          | 0          | 0          | 0          | 0          | 0          |
| 262066.56  | 238450.44  | 270481.37  | 231370.18  | 200963.20  | 186828.46  | 507249.32  | 651501.06  | 268143.98  |
| 0          | 0          | 0          | 0          | 0          | 0          | 2          | 0          | 0          |
| 21014.09   | 2118.67    | 1187.15    | 1294.88    | 1384.90    | 509.30     | 53275.36   | 5636.57    | 6801       |
| 6261.18    | 59355.68   | 73545.34   | 12244.16   | 2402       | 2414.66    | 5112.34    | 46346.36   | 64447.02   |
| 26656.67   | 52802.76   | 57427.50   | 10737.19   | 3874.96    | 2843.16    | 57590.48   | 59765.63   | 57128.84   |
| 28         | 297.50     | 0          | 124        | 0          | 0          | 26         | 0          | 2.33       |
| 155.42     | 1023.50    | 290        | 555.83     | 659        | 139.50     | 276.86     | 1491.84    | 2312       |
| 143247.49  | 217889.15  | 227364.51  | 77843.29   | 56976.25   | 51109.51   | 230368.09  | 223326.67  | 259119.75  |
| 417382.73  | 735793.03  | 822483.07  | 360082.55  | 226393.93  | 205032.34  | 601458.12  | 919934.02  | 810689.45  |
| 273976.41  | 800965.81  | 986050.12  | 343921.06  | 210639.62  | 189648.34  | 458334.65  | 869093.55  | 963456.71  |
| 648968.07  | 1279585.71 | 1494331.58 | 516565.12  | 264459.58  | 241074.04  | 1339264.27 | 1533562.75 | 1438749.27 |
| 715.61     | 5578.84    | 2239       | 7047.84    | 1106.93    | 277.33     | 678.67     | 5988.50    | 6520.40    |
| 896569.91  | 580172.13  | 658129.89  | 723051.90  | 764172.81  | 722783.83  | 1446238.72 | 911231.17  | 691885.52  |
| 509258.33  | 750684.44  | 914197.92  | 368836.93  | 208464.74  | 187122.07  | 1026582.72 | 912364.49  | 895544.20  |
| 120017.84  | 124982.45  | 123624.25  | 79462.90   | 96095.40   | 91139.30   | 170677.34  | 163013.47  | 120964.28  |
| 93281.07   | 138121.72  | 142721.78  | 44488.05   | 29765.73   | 27566.41   | 170438.63  | 142482.47  | 199745.26  |
| 2591400.98 | 2951095.64 | 3455747.04 | 1896256.71 | 1587971.55 | 1482920.76 | 4906776.85 | 3832779.86 | 3454174.87 |
| 1667924.83 | 1636028.37 | 1787130.58 | 1363004.80 | 1204058.12 | 1133720.22 | 2916086.36 | 2190851.79 | 1823016.10 |
| 22234.51   | 17455.21   | 23272.50   | 4222.93    | 1196.12    | 947.27     | 54154.10   | 16935.26   | 19056.81   |
| 2642.12    | 27021.51   | 31573.34   | 5621.33    | 1194.83    | 1005       | 2350.67    | 18952.68   | 30038.41   |
| 15.67      | 346.50     | 134        | 12.33      | 4          | 0          | 8          | 440        | 0          |
| 399539.69  | 33205.20   | 17188.32   | 74241.85   | 106308.85  | 105131.30  | 473908.90  | 116865.23  | 15500.69   |
| 200292.44  | 271756.41  | 327054.98  | 120794.74  | 90184.78   | 78010.40   | 350213.81  | 296396.59  | 325599.68  |
| 0          | 0          | 0          | 0          | 0          | 0          | 0          | 0          | 0          |
| 37882.13   | 64280.83   | 75090.06   | 23080.25   | 24827.04   | 23733.52   | 6780.29    | 66161.28   | 89007.61   |
| 196483.95  | 290668     | 373199.01  | 113193.08  | 22769.70   | 16908.95   | 450271.86  | 372134.17  | 326168.12  |
| 396.67     | 2998.10    | 3314       | 495.33     | 158.10     | 121        | 285        | 2169.80    | 3250.74    |
| 3          | 0          | 0          | 106.67     | 0          | 0          | 0          | 0          | 0          |
| 17739.16   | 10617.02   | 18660.95   | 42904.63   | 47826.14   | 42774.43   | 5169.30    | 19320.30   | 21023.22   |

|            |            |            |            |            |           |            |            |            |
|------------|------------|------------|------------|------------|-----------|------------|------------|------------|
| 226856.92  | 454395.94  | 515334.67  | 204086.64  | 157931.51  | 148031.51 | 361326.34  | 548887.07  | 501086.50  |
| 0          | 285.50     | 0          | 0          | 0          | 0         | 1          | 0          | 1468       |
| 625.11     | 4782.17    | 1239       | 7109.84    | 1089.43    | 291.83    | 684.67     | 4331.50    | 5089.40    |
| 142        | 0          | 4          | 0          | 5          | 5         | 5          | 265        | 1468       |
| 3828.30    | 36232.96   | 22355.32   | 7482.95    | 2148.16    | 1240.46   | 2852.37    | 28879.14   | 47344.41   |
| 326213.45  | 335414.76  | 376992.04  | 278624.86  | 218363.15  | 206157.49 | 615168.94  | 429649.32  | 393226.44  |
| 649200.67  | 549836.88  | 588976.92  | 546236.38  | 479376.98  | 452362.50 | 1168202.13 | 782587.02  | 617006.39  |
| 70598.41   | 119498.71  | 135268.15  | 66151.65   | 52488.40   | 48817.36  | 118421.22  | 151128.05  | 123837.19  |
| 705552.01  | 738018.10  | 756461.57  | 475061.65  | 378363.56  | 351743.94 | 1387616.41 | 850894.35  | 764537.11  |
| 412314.13  | 471052.49  | 552501.12  | 311140.82  | 287553.44  | 275559.31 | 733877.19  | 562246.99  | 532238.32  |
| 102957.96  | 157361.84  | 182996.45  | 68845      | 53167.58   | 49584.71  | 121987.31  | 178472.36  | 170085.30  |
| 1027800.73 | 1298235.35 | 1528274.57 | 857673.62  | 704438.43  | 663145.88 | 1879998.05 | 1591428    | 1434192.31 |
| 5          | 0          | 0          | 5          | 0          | 0         | 2          | 0          | 82         |
| 81726.74   | 51788.74   | 57310.84   | 38249.34   | 25928.10   | 24230.14  | 162953.75  | 87542.87   | 54861.43   |
| 8994.45    | 7375.34    | 6884.83    | 18356.36   | 21440.23   | 20922.60  | 1024.60    | 6503.67    | 12991.34   |
| 949728.60  | 1016260.24 | 1148103.58 | 777266.19  | 644218.54  | 603584.25 | 1639571.41 | 1317605.78 | 1131341.57 |
| 48291.88   | 60478.61   | 77780.45   | 36276.62   | 25783.44   | 24140.91  | 111653.13  | 69881.23   | 60902.88   |
| 252928.25  | 355254.86  | 398952.41  | 205798.22  | 159669.33  | 146485.36 | 459540.43  | 452732.31  | 396747.22  |
| 1007200.27 | 1008893.67 | 1166850.44 | 612410.21  | 481898.47  | 452885.75 | 1997887.77 | 1275793.88 | 1163290.19 |
| 105036.75  | 193217.98  | 219363.30  | 106118.19  | 76484.50   | 72318.09  | 176930.74  | 235126.86  | 211424.55  |
| 4703.02    | 38111.14   | 46328      | 7914.98    | 2084.09    | 1558.16   | 3910.34    | 29468.08   | 52982.06   |
| 126253.21  | 247560.53  | 260693.63  | 115031.36  | 61035.59   | 54628.66  | 181883.64  | 285398.69  | 280816.70  |
| 1316912.67 | 1100216.54 | 1192587.99 | 1098550.25 | 1037352.64 | 983236.88 | 2231916.58 | 1556732.76 | 1226965.43 |
| 85581.31   | 784567.40  | 983022.50  | 174283.47  | 48760.01   | 35124.23  | 75582.59   | 683204.21  | 831138.89  |
| 1297.02    | 5497.34    | 11442.23   | 7092.57    | 3173.35    | 1058.64   | 2607.02    | 9281.71    | 6442.40    |
| 66992.61   | 216927.14  | 248112     | 60680.37   | 33334.77   | 30634.42  | 72705.87   | 239508.60  | 251140.08  |
| 52971.81   | 158679.27  | 192560.49  | 52982.81   | 29366.21   | 28464.74  | 67216.17   | 168614.61  | 166082.10  |
| 44360.22   | 8321.79    | 4288.49    | 48693.07   | 64611.82   | 62357.68  | 54155.42   | 29072.59   | 13807.84   |
| 416722.81  | 431224.13  | 527550.15  | 282289.52  | 228212.25  | 213506.83 | 733162.64  | 551195.10  | 502764.06  |
| 113804.39  | 414041.87  | 553054.49  | 113188.55  | 32958.74   | 23304.23  | 151151.97  | 478247.17  | 506670.79  |
| 62399.61   | 224093.53  | 248748.32  | 90016.72   | 35616.26   | 31103.63  | 73861.05   | 236309.44  | 293123.31  |
| 15.67      | 0          | 0          | 12.33      | 0          | 0         | 4          | 0          | 0          |
| 178098.75  | 486653.55  | 599184.45  | 157859.52  | 91849.63   | 83661.31  | 204355.51  | 490928.38  | 582244.53  |
| 33612.86   | 49952.26   | 38113.22   | 45122.62   | 26788.56   | 23769.36  | 58295.87   | 69767.60   | 55637.38   |

|            |            |            |            |           |           |            |            |            |
|------------|------------|------------|------------|-----------|-----------|------------|------------|------------|
| 5          | 0          | 0          | 0          | 0         | 0         | 0          | 0          | 0          |
| 13074.76   | 36908.30   | 52216.83   | 8344.35    | 2909.02   | 2492.29   | 4350.02    | 45448.97   | 51847.77   |
| 17907.35   | 18525.85   | 22782.33   | 27896.50   | 43058.56  | 42123.95  | 2474.38    | 20307.14   | 19471.15   |
| 22582.68   | 22186.61   | 26425      | 11438.34   | 1531.68   | 1431.56   | 54490.34   | 38425.79   | 21344.91   |
| 24964.78   | 133599.71  | 182475.33  | 25097.13   | 6715.17   | 5051.07   | 13094.20   | 128320.79  | 175550.33  |
| 283583.66  | 261488.75  | 299846.87  | 164158.69  | 107725.77 | 100998.37 | 657930.58  | 371459.60  | 301982.66  |
| 15060.71   | 103069.66  | 141720.28  | 59564.48   | 10544.43  | 5900.59   | 13335.92   | 140453.09  | 129397.82  |
| 148192.86  | 314590.16  | 359218.57  | 87119.03   | 42792.04  | 37222.37  | 293785.06  | 329699.47  | 401161.36  |
| 573848.53  | 621371.73  | 692458.44  | 514072.41  | 441501.26 | 413046.54 | 967589.21  | 802366.94  | 689829.55  |
| 34289.95   | 9594.71    | 5232.25    | 14616.23   | 1695.88   | 1012.12   | 105597.10  | 19829.59   | 11365.87   |
| 558611.02  | 533923.58  | 639493.61  | 413240.67  | 390712.66 | 362739.43 | 1011439.53 | 710130.03  | 609842.37  |
| 338387.75  | 226367.13  | 246177.57  | 240027.75  | 254515.97 | 242291.73 | 708648.96  | 324545.03  | 252328.64  |
| 116460.08  | 168578.32  | 193514.82  | 83732.41   | 34490.93  | 30279.91  | 227249.66  | 204681.32  | 189390.90  |
| 209975.34  | 97357.57   | 102854.19  | 112176.34  | 153871.16 | 148999.20 | 63610.24   | 157957.99  | 103516.76  |
| 4972.94    | 37273.29   | 48228.67   | 20669.98   | 2665.81   | 1764.69   | 4046.71    | 54544.16   | 52026.37   |
| 29922.35   | 71946.37   | 75933.66   | 11282.60   | 2986.70   | 2321.96   | 5530.02    | 80980.99   | 71720.67   |
| 3834.67    | 24087.84   | 31838.32   | 16477.43   | 3170.37   | 1499.48   | 3355.07    | 34670.90   | 33435.31   |
| 2303.46    | 17724.28   | 25652.40   | 4170.54    | 1458.80   | 971.80    | 2103.84    | 26180.14   | 23062.47   |
| 638784.28  | 902704.59  | 977877.03  | 418789.24  | 307714.37 | 277622.89 | 1094474.80 | 1086734.18 | 959758.86  |
| 5892.51    | 50205.01   | 64176      | 10384      | 2301.20   | 2687.49   | 4433.51    | 50428.02   | 49997      |
| 300135.91  | 331959.44  | 412949.89  | 217053.91  | 161311.13 | 147058.96 | 565861.85  | 477554.67  | 386434.29  |
| 15275.80   | 130231.66  | 151221.01  | 24493.04   | 6748.10   | 5592.07   | 12321.03   | 111031.52  | 180040.63  |
| 509274.73  | 598266.90  | 655425.67  | 418949.72  | 315605.03 | 288047.91 | 912545.82  | 812581.62  | 673625.02  |
| 619170.38  | 589260.20  | 668720.80  | 544151.18  | 474117.02 | 450020.16 | 1063002.72 | 784379.91  | 651899.67  |
| 754.35     | 2687.27    | 9702.77    | 2951.37    | 1093.05   | 602.40    | 692.52     | 8408.85    | 2392.80    |
| 31.67      | 285.50     | 0          | 51.33      | 13.25     | 0         | 11         | 1002       | 3603       |
| 558102.10  | 551921.63  | 645783.34  | 440984.79  | 390067.25 | 364480.66 | 1012991.15 | 750013.40  | 645997.71  |
| 1355769.11 | 2363286.33 | 3104496.30 | 1078792.73 | 823160.52 | 766108.44 | 2150023.17 | 2671627.44 | 2718242.90 |
| 12181.69   | 109572.69  | 137721.34  | 22726.16   | 4703.20   | 5102.15   | 9560.85    | 96774.38   | 114444.02  |
| 118787.21  | 133339.28  | 144624.80  | 71182.57   | 52623.52  | 48526.36  | 223551.97  | 166525.82  | 146586.27  |
| 33804.70   | 44448.86   | 51308.15   | 36383.37   | 25479.35  | 23515.94  | 57448.65   | 67664.22   | 50046.88   |
| 39652.85   | 20909.02   | 25684.67   | 5415.99    | 1826.76   | 1472.15   | 2586.67    | 66639.61   | 29768.67   |
| 1080162.25 | 930176.84  | 1041547.85 | 918853.67  | 852504.84 | 809768.12 | 1846292.47 | 1354540.90 | 1017683.42 |
| 90014.46   | 40025.31   | 53910.73   | 61525.70   | 70228.79  | 65051.94  | 164521.22  | 80583.96   | 47208.83   |

|           |           |            |           |           |           |            |           |           |
|-----------|-----------|------------|-----------|-----------|-----------|------------|-----------|-----------|
| 774442.28 | 714021.54 | 769277.53  | 676820.94 | 595945.93 | 563660.59 | 1342198.75 | 995112.89 | 792919.39 |
| 153093.72 | 105576.41 | 114476.43  | 120603.85 | 116049.66 | 110616.91 | 275001.78  | 165443.22 | 120077.83 |
| 21566.60  | 7067.51   | 3203.17    | 33701.86  | 4020.50   | 1482.79   | 55439.69   | 20622.31  | 17489.23  |
| 59672.24  | 26717.20  | 33800.96   | 36982.39  | 45898.82  | 44337.18  | 109628.95  | 65329.17  | 30658.02  |
| 6261.18   | 59355.68  | 73545.34   | 12244.16  | 2402      | 2414.66   | 5112.34    | 46346.36  | 64447.02  |
| 12024.59  | 38857.18  | 56457.34   | 8164.48   | 1841.40   | 1622.33   | 3999.34    | 35760.34  | 48415.35  |
| 47787.37  | 48140.70  | 51232.14   | 25483.02  | 25345.74  | 23548.64  | 57821.91   | 64022.95  | 48860.69  |
| 521854.40 | 435746.69 | 481173.74  | 418438.15 | 378991.16 | 359026.42 | 942550.05  | 595344.24 | 490558.85 |
| 108603.26 | 284680.95 | 313339.82  | 125430.36 | 67076.80  | 60079.03  | 189067.32  | 274335.34 | 303426.50 |
| 439657.33 | 801679.37 | 942672.46  | 406650.27 | 288473.83 | 270468.65 | 713660.16  | 904342.43 | 966035.21 |
| 0         | 0         | 0          | 0         | 0         | 0         | 0          | 0         | 0         |
| 253291.05 | 812266.33 | 1045225.96 | 308212.02 | 223800.77 | 208661.05 | 297278     | 836866.88 | 912345.21 |
| 7939.79   | 2067.41   | 2382.50    | 13798.28  | 21425.42  | 20846.73  | 710.88     | 7639.92   | 2818.13   |
| 1728.17   | 18017     | 5344.33    | 7038.83   | 660.90    | 320.50    | 734.17     | 18384     | 24465.33  |
| 104620.30 | 170518.28 | 177577.85  | 93307.80  | 78346.70  | 71333.53  | 176987.41  | 206386.23 | 184986.15 |
| 0         | 0         | 0          | 0         | 0         | 0         | 0          | 0         | 0         |
| 5         | 0         | 0          | 0         | 0         | 0         | 0          | 0         | 0         |
| 71005.61  | 5155.76   | 1614.13    | 15299.39  | 22062.78  | 21296.41  | 105889.21  | 19719.60  | 2736.07   |
| 83407.83  | 240568.34 | 287864.68  | 64594.10  | 33827.20  | 32673.51  | 127463.91  | 226998.97 | 299645.64 |
| 19739.43  | 105743.69 | 121867.93  | 47744.32  | 7669.78   | 4915.71   | 10138.10   | 100628.11 | 134986.64 |
| 5         | 0         | 0          | 0         | 0         | 0         | 0          | 0         | 0         |
| 81918.51  | 109911.90 | 127047.04  | 56456.18  | 30969.61  | 27227.92  | 168941.76  | 120584.12 | 121785.44 |
| 0         | 0         | 0          | 0         | 0         | 0         | 0          | 0         | 0         |
| 27680.55  | 105576.20 | 126785.21  | 35739.92  | 28920.93  | 25781.74  | 12075.62   | 102033.06 | 117632.91 |
| 248084.90 | 271546.51 | 291344.05  | 193687.74 | 173633.66 | 160740.51 | 451634.91  | 340547.84 | 314809.07 |
| 29644.71  | 79355.81  | 95516.22   | 25430.49  | 6146.11   | 4567.21   | 60835.15   | 88180.57  | 85904.18  |
| 5572.69   | 50849.86  | 55180.40   | 10961.13  | 4093.29   | 2565.47   | 5277.21    | 42249.19  | 58429.54  |
| 2819.10   | 21055.51  | 24656.82   | 5819.01   | 1934.46   | 1465.19   | 2549.77    | 27513.93  | 22082.90  |
| 64662.89  | 81798.62  | 93364      | 29875.20  | 25690.30  | 24731.97  | 112632.73  | 90551.57  | 93780.66  |
| 98002.13  | 700927.14 | 941830.72  | 161657.42 | 62579.49  | 51835.23  | 68982.44   | 674108.41 | 751662.16 |
| 229610.45 | 263942.93 | 297554.43  | 225088.21 | 173983.35 | 161393.83 | 399099.97  | 348194.10 | 308078.84 |
| 47433.86  | 273052.98 | 320831.52  | 54883.74  | 14527.79  | 12821.31  | 25575.98   | 267238.25 | 359859.07 |
| 37814.63  | 314238.51 | 427417.36  | 66834.53  | 21786.02  | 17109.25  | 33046.43   | 350729.88 | 391665.99 |
| 560334.64 | 511054.26 | 573167.69  | 452711.64 | 408304.90 | 385673.68 | 1005761.47 | 704814.62 | 583099.93 |





|           |           |           |           |           |           |            |            |            |
|-----------|-----------|-----------|-----------|-----------|-----------|------------|------------|------------|
| 129307.83 | 146538.84 | 156342    | 111925.74 | 98109.96  | 92130.36  | 226495.12  | 180033.50  | 164141.48  |
| 246317.67 | 217244.16 | 243581.87 | 224697.48 | 197552.57 | 184382.73 | 451205.48  | 547791.42  | 246075.18  |
| 458776.16 | 290242.48 | 290231.91 | 378101.76 | 351294.96 | 330333.07 | 778398.16  | 442721.80  | 346155.59  |
| 0         | 244       | 536       | 0         | 0         | 0         | 0          | 0          | 0          |
| 115239.74 | 177176.59 | 214122.39 | 120026.75 | 81752.58  | 72450.62  | 180130.42  | 247835.41  | 209817.21  |
| 945321.80 | 736083.08 | 827518.17 | 644458.53 | 515523.16 | 480158.47 | 1818475.14 | 1028058.82 | 853887.56  |
| 544835.63 | 577881.26 | 604837.01 | 413533.25 | 400247.30 | 369731.96 | 859094.38  | 684070.92  | 610365.97  |
| 115917.58 | 473195.82 | 569219.86 | 106062.73 | 28556.32  | 20295.66  | 202965.81  | 427695.98  | 544945.32  |
| 458073.84 | 833784.27 | 978955.63 | 409275.17 | 277908.94 | 255345.89 | 825108.62  | 887264.11  | 905433.96  |
| 87256.63  | 88559.14  | 101507.53 | 66240.90  | 75680.63  | 67606.04  | 171292.70  | 99088.77   | 102503.94  |
| 514084.47 | 131800.31 | 140424.99 | 388159.16 | 485653.71 | 465465.34 | 662114.02  | 313254.58  | 182980.95  |
| 16273.39  | 4715.01   | 13263.92  | 23676.32  | 43541.81  | 41773.62  | 1682.72    | 8569.31    | 3825.41    |
| 2         | 0         | 0         | 0         | 0         | 0         | 0          | 0          | 0          |
| 368852.95 | 755566.38 | 856434.88 | 230499.28 | 109321.37 | 100513.89 | 752455.38  | 756267.67  | 923419.30  |
| 164773.40 | 103189.96 | 116317.10 | 80944.50  | 92557.11  | 89894.92  | 326512.62  | 143216.75  | 113560.05  |
| 109973.22 | 172951.70 | 184999.54 | 76522.96  | 74381.07  | 69956.34  | 69232.08   | 209846.76  | 236240.37  |
| 0         | 0         | 0         | 0         | 0         | 0         | 0          | 0          | 0          |
| 0         | 0         | 0         | 0         | 0         | 0         | 0          | 0          | 0          |
| 553444.60 | 819210.32 | 944039.84 | 341740.11 | 226792.43 | 209624.43 | 1079519.33 | 889638.35  | 1022478.58 |
| 43.50     | 13        | 61.50     | 129       | 115.25    | 69.50     | 109        | 2          | 4          |
| 11877.78  | 34740.02  | 42017.15  | 22091.47  | 23471.47  | 22657.59  | 4351.98    | 43556.15   | 39984.65   |

| D15        | D16        | D17        | D18        | D19        | D2         | D20        | D3         | D4         |
|------------|------------|------------|------------|------------|------------|------------|------------|------------|
| 0          | 0          | 0          | 4.60       | 5.40       | 3.80       | 0          | 0          | 0          |
| 597161.72  | 559233.02  | 404953     | 271767.43  | 253745.63  | 889722.85  | 274597.26  | 883062.39  | 416433.78  |
| 2205431.82 | 2862996.33 | 2035216.29 | 1507987.27 | 1427640.46 | 2973056.74 | 1440617.57 | 4362087.20 | 1381560.88 |
| 443762.20  | 649934.91  | 465801.09  | 282670     | 264533.31  | 655287.19  | 271458.53  | 1036833.77 | 324010.79  |
| 53404.29   | 44927.76   | 30955.98   | 25635.40   | 24051.65   | 63888.55   | 25716.80   | 66410.05   | 32776.83   |
| 18602.99   | 10189.96   | 1542.84    | 23324.86   | 23219.78   | 24794.13   | 21210.06   | 3403.95    | 14981.83   |
| 177899.70  | 260561.59  | 182815.53  | 148371.96  | 141521.39  | 227490.08  | 139964.20  | 389703.50  | 109243.51  |
| 0          | 0          | 2          | 0          | 0          | 748        | 0          | 0          | 25         |
| 5398745.69 | 5673611.72 | 4256421.45 | 3772582.76 | 3602976.76 | 7074947.90 | 3616566.77 | 8154842.52 | 3956822.01 |
| 41452.62   | 61997.76   | 31751.75   | 69672.55   | 68511.85   | 48558.93   | 62269.78   | 69062.71   | 27945.50   |
| 192793.51  | 96652.65   | 64905.95   | 57177.97   | 52484.56   | 319902.08  | 62789.16   | 150757.78  | 167000.80  |
| 619453.08  | 894165.26  | 665135.91  | 143752.42  | 116080.73  | 931997.08  | 156957.61  | 1593523.74 | 452614.26  |
| 42855.64   | 2817.33    | 1043.68    | 2311.60    | 1502.81    | 76415.16   | 5473.81    | 6068.18    | 50125.32   |
| 54193.63   | 12329.96   | 17818.92   | 25327.52   | 24156.70   | 71238.68   | 27531.91   | 7466.05    | 52310.32   |
| 1870.50    | 126        | 33         | 91         | 69         | 130        | 59         | 137        | 2074       |
| 18598.32   | 1694.63    | 1085.17    | 1372.53    | 1215.28    | 24605.70   | 2492.05    | 3334.62    | 14981.83   |
| 489754.23  | 472498.77  | 361772.90  | 323980.08  | 309817.68  | 541497.53  | 314817.81  | 678045.93  | 231866.65  |
| 272085.64  | 267497.43  | 216430.75  | 152356.72  | 143434.67  | 354008.10  | 149798.01  | 396673.16  | 177163.64  |
| 188015.81  | 53401.75   | 64639.12   | 32657.20   | 28499.75   | 305933.48  | 42531.66   | 83850.09   | 167232.63  |
| 2556.18    | 538.26     | 30853.64   | 79.86      | 186.20     | 7220.40    | 583.80     | 347.40     | 249        |
| 266798.21  | 385857.41  | 252042.41  | 131764.54  | 121203.34  | 401604.37  | 127295.69  | 641954.12  | 176812.97  |
| 0          | 0          | 2          | 0          | 0          | 748        | 0          | 0          | 25         |
| 327978.32  | 438060.73  | 290323.94  | 249433.03  | 237269.86  | 487067.89  | 235285.57  | 655830.63  | 207932.49  |
| 1043629.82 | 1993698.39 | 1792764.84 | 432834.46  | 377888.97  | 1300258.53 | 428128.97  | 3465761.18 | 640593.25  |
| 46353.94   | 3532.93    | 1869.51    | 3045.34    | 2124.58    | 79354.44   | 7015.96    | 7532.86    | 39169.66   |
| 0          | 0          | 11         | 0          | 0          | 0          | 0          | 0          | 0          |
| 269092.42  | 544323.26  | 414785.57  | 203681.68  | 189263.26  | 342375.67  | 187896.72  | 886397.57  | 150521.16  |
| 111887.71  | 81659.44   | 77094.77   | 29786.65   | 26772.45   | 179829.55  | 33424.57   | 137446.98  | 97081.31   |
| 173823.30  | 103145.80  | 64107.09   | 77609.95   | 73351.47   | 236527.37  | 80590.06   | 145893.83  | 168079.63  |
| 366865.45  | 553216.38  | 460168.52  | 38872.81   | 21358.59   | 673858.74  | 57094.19   | 1030160.42 | 315351.95  |
| 600942.97  | 165248.34  | 180865.15  | 102221.20  | 88412.42   | 914490.80  | 134478.51  | 255459.71  | 608022.52  |
| 0          | 0          | 0          | 0          | 0          | 0          | 0          | 0          | 0          |
| 4108       | 131.67     | 89         | 160.67     | 119.33     | 7369       | 292        | 422        | 179        |

|            |            |            |           |           |            |           |            |            |
|------------|------------|------------|-----------|-----------|------------|-----------|------------|------------|
| 385193.49  | 332085.16  | 271417.41  | 52782.97  | 38319.91  | 674977.16  | 69110.33  | 595169.41  | 333265.93  |
| 0          | 0          | 2          | 0         | 6         | 748        | 0         | 0          | 25         |
| 8181.34    | 33172      | 29264.67   | 1463.98   | 536.70    | 2402.50    | 2240.17   | 61199.80   | 126.67     |
| 12627.80   | 33450.70   | 28922.84   | 1524.90   | 522.89    | 19872.48   | 1795.89   | 62284.74   | 14180.33   |
| 55873.25   | 4669.68    | 2708.18    | 4681.67   | 3105.61   | 85883.67   | 9611.91   | 11269.21   | 51231.67   |
| 32088.45   | 44339.97   | 6329.35    | 111488.95 | 111734.90 | 40275.09   | 98968.65  | 6180.03    | 7533       |
| 8222.66    | 818.52     | 586        | 606.83    | 377.15    | 7246.30    | 1370.82   | 721.17     | 291        |
| 1419935.70 | 1522649.43 | 1169396.09 | 820176.67 | 773613.43 | 1989473.09 | 803063.03 | 2325609.41 | 961679.58  |
| 1536387.51 | 1656978.54 | 1215140.56 | 756495.92 | 704833.60 | 2066931.30 | 763566.49 | 2640393.46 | 1152662.81 |
| 0          | 0          | 2          | 0         | 6         | 748        | 0         | 0          | 25         |
| 9689.78    | 17527.71   | 1696.84    | 44276.60  | 44442.77  | 16875.35   | 39310.31  | 2367.97    | 1941       |
| 3487.80    | 374.34     | 207        | 416.67    | 154.66    | 2872.73    | 445.16    | 860.62     | 2642       |
| 42855.64   | 2817.33    | 1043.68    | 2311.60   | 1502.81   | 76415.16   | 5473.81   | 6068.18    | 50125.32   |
| 0          | 0          | 0          | 0         | 0         | 0          | 0         | 0          | 0          |
| 250892.85  | 92757.80   | 83914.16   | 39419.41  | 34226.52  | 336494.10  | 53186.67  | 158545.93  | 205177.31  |
| 101224.14  | 81257.31   | 123616.44  | 29527.64  | 26767.63  | 151515.90  | 31920.49  | 137294.35  | 80646.82   |
| 175671.43  | 201984.01  | 167124.75  | 80986.43  | 74231.31  | 229522.79  | 80141.59  | 325701.38  | 97567.66   |
| 106408.68  | 132264.45  | 92071.90   | 75381.19  | 71632.06  | 155262.06  | 71827.04  | 197008.44  | 66892.33   |
| 0          | 0          | 0          | 0         | 0         | 0          | 0         | 0          | 0          |
| 28097.32   | 2216.63    | 1261.67    | 1509.53   | 1439.78   | 30715.70   | 3162.55   | 4255.97    | 15504.83   |
| 2.50       | 52.50      | 13         | 3.50      | 21.50     | 2374       | 1.50      | 67         | 25         |
| 112        | 348        | 120        | 252       | 132       | 60         | 204       | 1982       | 0          |
| 198374.61  | 112226.04  | 93047.72   | 14128.18  | 8248.25   | 286733.58  | 26170.67  | 205883.49  | 182555.79  |
| 984455.01  | 707716.66  | 508382.71  | 444414.62 | 419246.41 | 1413443.47 | 450290.30 | 1043371.89 | 712043.90  |
| 58592.93   | 4344.40    | 2655.68    | 3756.23   | 2915.29   | 80244.76   | 8121.76   | 7940.89    | 51179.32   |
| 508857.19  | 795362.36  | 539594.69  | 398357.64 | 377128.86 | 803869.20  | 373878.07 | 1230917.48 | 367471.60  |
| 36670.78   | 3285.46    | 2505.17    | 2736.93   | 2179.21   | 63184.95   | 5360.07   | 7227.14    | 16966.33   |
| 309261.60  | 547949.81  | 400403.22  | 204823.02 | 190299.43 | 493113.79  | 193993.22 | 894713.34  | 231672.65  |
| 5544.31    | 604.38     | 1498.50    | 654.59    | 649.75    | 14086.34   | 806.55    | 874.42     | 1961       |
| 215343.42  | 74404.40   | 38316.68   | 79640.39  | 75332.03  | 315322.55  | 81168.53  | 88012.51   | 164345.64  |
| 83365.59   | 38847.11   | 31620.69   | 5813.40   | 3717.56   | 134114.79  | 11113.30  | 72571.96   | 80508.15   |
| 7443.33    | 423.98     | 15828.17   | 310.69    | 237.75    | 2485.67    | 875.15    | 938.13     | 3158       |
| 78206.69   | 87894.54   | 91854.33   | 50181.68  | 47620.65  | 111289.54  | 47854.25  | 132432.97  | 46617.33   |
| 42855.64   | 2817.33    | 1043.68    | 2315.60   | 1502.81   | 76415.16   | 5473.81   | 6068.18    | 50125.32   |

|            |            |            |            |            |            |            |            |            |
|------------|------------|------------|------------|------------|------------|------------|------------|------------|
| 0          | 0          | 2          | 1          | 0          | 751        | 0          | 0          | 25         |
| 199065.70  | 318100.67  | 238306.31  | 128098.66  | 119486.46  | 302350.15  | 121951.03  | 515218.79  | 148051.80  |
| 476089.80  | 539229.76  | 430095.50  | 325267.22  | 310089.08  | 674355.06  | 316127.02  | 800683.27  | 323132.78  |
| 65611.92   | 5145.72    | 3531.51    | 3302.76    | 2724.44    | 90199.02   | 7182.34    | 8231.26    | 57874.99   |
| 30271.79   | 43126.60   | 30554.91   | 24688.55   | 23566.47   | 43394.82   | 23204.68   | 65183.69   | 16026.83   |
| 47228.58   | 44500.70   | 30784.25   | 25585.61   | 24125.87   | 62103.56   | 25606.28   | 67118.05   | 40888.66   |
| 210871.37  | 128740.92  | 124409.57  | 57376.10   | 51753.68   | 314173.32  | 64741.60   | 209543.58  | 197541.30  |
| 48566.44   | 3427.83    | 1405.68    | 2711.43    | 1852.01    | 82590.03   | 5760.65    | 6829.28    | 54868.32   |
| 0          | 0          | 2          | 0          | 0          | 748        | 0          | 0          | 25         |
| 0          | 0          | 0          | 0          | 0          | 0          | 0          | 0          | 0          |
| 847179.97  | 658358.72  | 490126.29  | 258439.49  | 232065.81  | 1317472.33 | 286843.57  | 1081560.59 | 727850.68  |
| 103336.71  | 8181.44    | 3149.59    | 6405.92    | 4091.95    | 158697.31  | 13661.60   | 12839.22   | 103144.31  |
| 119573.55  | 82647.93   | 61469.27   | 30561.66   | 26887.87   | 200473.72  | 34099.92   | 137577.03  | 109286.81  |
| 359055.96  | 473961.61  | 321080.48  | 253039.97  | 239384.27  | 497322.87  | 241056.47  | 724174.95  | 236776.15  |
| 86843.39   | 47128.85   | 32261.59   | 27671.46   | 25511.12   | 116155.79  | 30016.37   | 72681.19   | 68165.32   |
| 680060.69  | 396445.50  | 299070.78  | 93903.04   | 74818.32   | 1120357.08 | 129768.21  | 704796.10  | 625640.87  |
| 1861287.56 | 1355425.58 | 907285.59  | 849243.81  | 803007.75  | 3091057.44 | 867729.46  | 2012751.77 | 1600628.69 |
| 53176.27   | 12230.66   | 2684.31    | 24847.88   | 24429.29   | 78261.77   | 25002.74   | 7758.48    | 33234.33   |
| 692865.94  | 711901.69  | 554389.91  | 323334.81  | 300114.26  | 985982.78  | 326361.73  | 1137422.28 | 483154.83  |
| 276942.37  | 109682.40  | 97172.95   | 82605.43   | 75747.78   | 384240.79  | 91968.92   | 154749.90  | 250453.44  |
| 67336.56   | 45172.48   | 61317.59   | 26079.65   | 24052.42   | 84595.32   | 28122.44   | 67623.34   | 46285.99   |
| 29361.13   | 43466.93   | 30471.41   | 24683.30   | 23563.77   | 37735.13   | 23020.35   | 64677.69   | 17041      |
| 366107.76  | 200921.41  | 163645.93  | 134293.74  | 125827.95  | 578302.09  | 138362.20  | 291893.03  | 277817.29  |
| 961        | 6          | 11         | 0          | 0          | 42         | 35         | 33         | 24         |
| 0          | 0          | 0          | 1          | 0          | 3          | 0          | 0          | 0          |
| 3036769.08 | 3029890.81 | 2417116.18 | 1417568.54 | 1317758.51 | 4177865.19 | 1414773.95 | 4787188.52 | 2447668.29 |
| 99638.92   | 7189.95    | 2652.86    | 5881.05    | 3889.45    | 148626.78  | 12433.07   | 12127.37   | 115044.64  |
| 6109       | 8460.13    | 282.17     | 21883.62   | 21903.25   | 3025.58    | 18792.39   | 178.25     | 214        |
| 21911.63   | 34335.15   | 29491.84   | 2129.27    | 999.47     | 33093.93   | 3147.44    | 63169.16   | 15401      |
| 275363.45  | 298435     | 254471.59  | 66494.84   | 55447.01   | 473915.57  | 72389.20   | 520722.62  | 235777.45  |
| 8237.10    | 1746.99    | 1264.50    | 1456.04    | 1401.26    | 43036.30   | 2935.46    | 7366.85    | 15617.50   |
| 1519915.91 | 2425187.66 | 1721907.41 | 1291616.01 | 1226305.29 | 2044489.09 | 1204876.76 | 3669922.42 | 877847.33  |
| 0          | 0          | 0          | 0          | 6          | 0          | 0          | 0          | 0          |
| 71675.76   | 38715.92   | 48308.58   | 5294.18    | 3383.03    | 93238.52   | 10940.97   | 71483.89   | 40333      |

|            |            |            |            |            |            |            |            |            |
|------------|------------|------------|------------|------------|------------|------------|------------|------------|
| 459534.75  | 724408.37  | 509178.89  | 307006.94  | 286885.50  | 645244.58  | 291264.54  | 1153813.11 | 294306.14  |
| 2385       | 110.67     | 76         | 120.67     | 73.33      | 5977       | 154.33     | 304.50     | 77         |
| 805805.45  | 1164546.31 | 820523.62  | 645307.52  | 613889.30  | 1087246.21 | 606978.21  | 1750927.91 | 508322.97  |
| 1171.50    | 104.50     | 31         | 49.50      | 41.50      | 1818.50    | 15.50      | 126.17     | 8          |
| 0          | 0          | 0          | 0          | 0          | 0          | 0          | 0          | 0          |
| 245655.65  | 383994.27  | 242482.95  | 202066.40  | 191115.87  | 361048.47  | 189433.18  | 591521.40  | 150288.80  |
| 0          | 0          | 0          | 0          | 6          | 0          | 0          | 0          | 0          |
| 10541.34   | 33487.50   | 29432.67   | 1769.48    | 689.20     | 7025       | 2659.67    | 61323.97   | 228.67     |
| 42855.64   | 2817.33    | 1043.68    | 2311.60    | 1502.81    | 76415.16   | 5473.81    | 6068.18    | 50125.32   |
| 54617.85   | 36397.55   | 30875.01   | 3724.44    | 2044.05    | 97442.66   | 5423.49    | 66688.02   | 37830.66   |
| 120        | 117.34     | 40         | 98.67      | 57.66      | 295.67     | 181.66     | 68         | 0          |
| 3077       | 296        | 601        | 252.50     | 240.30     | 7178.50    | 344.50     | 563.17     | 1696       |
| 182344.01  | 161550.64  | 167873.36  | 59317.98   | 52475.51   | 273601.13  | 64788.66   | 267126.27  | 135743.31  |
| 704326.30  | 444306.10  | 453052.04  | 223332.41  | 205269.92  | 975327.43  | 238765.89  | 699144.17  | 506737.43  |
| 731463.25  | 344290.73  | 188662.75  | 203935.92  | 187570.72  | 1051373.81 | 232317.35  | 530966.52  | 629860.91  |
| 1161028.75 | 905123.50  | 646866.17  | 265251.20  | 231096.72  | 1774288.18 | 305043.25  | 1555503.17 | 920051.52  |
| 6134.33    | 491.72     | 282.50     | 332.19     | 236.08     | 9356.23    | 868.05     | 831.75     | 801        |
| 764021.79  | 1181849.11 | 870171.98  | 792486.08  | 762610.78  | 870522.88  | 727761.12  | 1676844.49 | 353361.31  |
| 678752.96  | 696035.53  | 544716.75  | 207186.71  | 184087.22  | 997814.39  | 225493.07  | 1187579.85 | 561192.57  |
| 121609.16  | 140704.39  | 123757.25  | 97901.18   | 94766.69   | 146200.23  | 93261.66   | 198960.50  | 83560.50   |
| 114170.54  | 114947.21  | 105509.87  | 31496.43   | 26701.47   | 185986.67  | 33445.24   | 196959.31  | 89730.65   |
| 2908282.83 | 3588574.07 | 2590534.11 | 1630492.90 | 1521554.61 | 4181278.86 | 1593341.31 | 5680673.61 | 2069860.73 |
| 1727146.74 | 2248829.05 | 1639849.75 | 1243483.35 | 1180622.56 | 2290302.83 | 1184472.47 | 3387052.50 | 1062074.08 |
| 15178.10   | 33488.05   | 29226.84   | 1589.58    | 572.89     | 25935.83   | 1951.39    | 62345.14   | 14868.33   |
| 20383.65   | 989.22     | 447.84     | 846.80     | 591.30     | 34643.93   | 2815.20    | 2528.76    | 22817.66   |
| 0          | 46         | 18.50      | 0          | 20         | 1826       | 107        | 67.67      | 0          |
| 72204.73   | 338036.85  | 626918.53  | 119136.76  | 111121.55  | 31926.48   | 102086.90  | 545239.59  | 11377      |
| 283539.75  | 242464.29  | 232712.21  | 87701.29   | 78799.71   | 374510.82  | 98603.28   | 404971     | 188219.14  |
| 0          | 0          | 0          | 0          | 0          | 0          | 0          | 0          | 0          |
| 64008.95   | 12240.76   | 48083.19   | 25181.47   | 24055.68   | 75075.62   | 25603.78   | 6760.07    | 45572.99   |
| 280973.55  | 278585.40  | 238337.98  | 20617.60   | 9975.82    | 385489.34  | 35591.18   | 518489.19  | 224612.28  |
| 1449.80    | 233        | 79.50      | 101        | 111.50     | 6523.63    | 387.50     | 399.27     | 778        |
| 0          | 0          | 0          | 1          | 0          | 3          | 0          | 0          | 0          |
| 31512.95   | 20171.05   | 4395.34    | 46214.59   | 46169.40   | 24571.79   | 43959.72   | 7162.39    | 3779       |

|            |            |            |            |            |            |            |            |           |
|------------|------------|------------|------------|------------|------------|------------|------------|-----------|
| 430111.94  | 275013.83  | 203054.45  | 159024     | 147664.11  | 658471.73  | 166040.15  | 416387.11  | 323894.28 |
| 0          | 0          | 0          | 7          | 0          | 203        | 0          | 16         | 0         |
| 6620.33    | 518.39     | 320        | 380.86     | 245.41     | 14138.80   | 836.71     | 1029.75    | 691       |
| 0          | 4.50       | 11         | 9.50       | 1.50       | 9          | 1.50       | 0          | 0         |
| 22672.79   | 1858.31    | 1177.17    | 1707.42    | 1301.95    | 42587.28   | 3842.74    | 4064.91    | 13542     |
| 358083.32  | 460948.11  | 316835.88  | 227371.93  | 213947.28  | 484777.28  | 218073.93  | 713154.40  | 225540.31 |
| 609103.40  | 903998.26  | 637350.21  | 496244.75  | 472378.69  | 803124.89  | 464802.23  | 1359060.50 | 347466.49 |
| 120583.99  | 91304.55   | 63049.93   | 52818.76   | 49779.51   | 178078.89  | 53012.71   | 138434.09  | 80310.99  |
| 658749.49  | 993010.15  | 747990.03  | 389687.44  | 361680.66  | 1016075.51 | 374233.02  | 1611735.41 | 451351.45 |
| 438949.21  | 557341.48  | 393142.22  | 299657.36  | 283948.73  | 653423.05  | 285034.77  | 850840.58  | 323485.10 |
| 143140.58  | 93124.22   | 124348.35  | 53837.11   | 50082.70   | 218141.79  | 56441.94   | 141778.86  | 109469.98 |
| 1307625.21 | 1414028.52 | 982097     | 724440.90  | 681160.90  | 1830713.74 | 709158.93  | 2181550.70 | 918660.21 |
| 0          | 3          | 0          | 4          | 0          | 3          | 0          | 13         | 0         |
| 53943.73   | 109760.16  | 103548.09  | 27000.99   | 24117.89   | 74544.41   | 25533.84   | 187949.60  | 33335     |
| 8830.67    | 9136.89    | 752.17     | 22335.27   | 22293.19   | 11924.13   | 19569.90   | 1566.55    | 3579.50   |
| 1022732.76 | 1248350.28 | 962800.01  | 660154.50  | 624478.20  | 1427141.86 | 638087.69  | 1906826.14 | 673277.77 |
| 54508.93   | 77906.63   | 44471.65   | 26684.27   | 24445.35   | 89471.43   | 26395.57   | 128260.93  | 45083.99  |
| 344672.59  | 338091.68  | 245820.83  | 159483.40  | 148741.06  | 480330.98  | 161273.64  | 535159.48  | 242098.97 |
| 978368.48  | 1406959.56 | 1090754.04 | 504317.95  | 462544.30  | 1412314.80 | 492543.14  | 2312969.24 | 704291.06 |
| 168064.67  | 135928.70  | 93355.49   | 78875.09   | 73749.13   | 248797.26  | 81281.64   | 205654.91  | 144273.31 |
| 27976.72   | 1847.66    | 812.84     | 1774.21    | 1124.46    | 42920.99   | 4017.66    | 4388.58    | 27807.66  |
| 215587.44  | 131180.56  | 140735.93  | 58574.51   | 52945.70   | 371881.56  | 66101.36   | 212018.97  | 164267.13 |
| 1210405.51 | 1775028.71 | 1278710.04 | 1077639.09 | 1030748.28 | 1615024.31 | 1006959.28 | 2596625.61 | 703152.31 |
| 621034.16  | 43524.19   | 20413.47   | 33441.95   | 24279.80   | 1084602.89 | 73180.20   | 87256.95   | 606730.03 |
| 19739.63   | 1797.15    | 2656       | 1729.62    | 1574.21    | 19432.77   | 3547.87    | 3959.55    | 2471      |
| 179609.15  | 52927.37   | 64429.95   | 32209.37   | 28227.02   | 288825.72  | 41242.43   | 82704.87   | 155921.30 |
| 126087.51  | 49971.93   | 47908.44   | 29544.23   | 26566.40   | 228488.11  | 33737.02   | 77811      | 123261.97 |
| 20444.44   | 59126.06   | 30257.58   | 67767.55   | 66475.46   | 23667.24   | 59982.26   | 62386.23   | 1712.67   |
| 455597.78  | 533647.64  | 455483.02  | 235538.79  | 219187.30  | 610712.75  | 231562.90  | 847513.71  | 308916.96 |
| 410445.11  | 95242.53   | 120717.56  | 24798.57   | 16640.60   | 546277.03  | 49311.96   | 172571.06  | 335804.94 |
| 191904.79  | 55030.59   | 50925.55   | 33606.54   | 29733.80   | 325423.26  | 44073.84   | 86580.91   | 166257.96 |
| 741        | 0          | 0          | 0          | 0          | 754        | 4          | 37.67      | 25        |
| 415383.99  | 152023.99  | 176216.16  | 91316.89   | 81835.37   | 594738.73  | 112385.42  | 234350.64  | 378051.91 |
| 40391.82   | 45800.43   | 32060.41   | 26402.83   | 25008.57   | 64753.76   | 25966.85   | 68944.10   | 17868     |

|            |            |            |           |           |            |           |            |            |
|------------|------------|------------|-----------|-----------|------------|-----------|------------|------------|
| 0          | 0          | 2          | 0         | 0         | 748        | 0         | 0          | 25         |
| 41854.78   | 2609.76    | 16634.51   | 1927.55   | 1384.36   | 59148.54   | 4192.60   | 4852.75    | 31796.66   |
| 22418.80   | 18057.79   | 1038.91    | 44716.27  | 44514.83  | 33430.39   | 39687.09  | 2398.60    | 13607.33   |
| 16623.30   | 33772.55   | 29042.34   | 1610.35   | 698.79    | 29192.86   | 2042.56   | 62879.49   | 15013      |
| 108036.94  | 7971.55    | 18481.53   | 6859.21   | 4341.28   | 160626.80  | 13982.72  | 13227.34   | 116432.64  |
| 249760.33  | 443696.38  | 309122.68  | 112716.93 | 100266.19 | 348951.68  | 109311.83 | 762365.66  | 171482.49  |
| 106642.87  | 9333.73    | 5556.45    | 7323.48   | 5766.39   | 151958.13  | 15097.09  | 16239.32   | 81742.82   |
| 272095.88  | 192038.99  | 153852.74  | 41846.65  | 33651.47  | 434143.50  | 53470.80  | 341103.04  | 232162.13  |
| 624729.79  | 755716.67  | 551556.04  | 448037.64 | 427985.12 | 919340.43  | 426794.72 | 1129379.36 | 401679.79  |
| 9550.77    | 65934.63   | 42406.67   | 2124.43   | 600.65    | 12120.05   | 1434.22   | 122047.80  | 1384       |
| 564174.21  | 767826.55  | 547134.25  | 403535.30 | 380623.28 | 707031.36  | 386887.37 | 1174476.91 | 363865.47  |
| 213912.19  | 534085.39  | 308934.59  | 265393.74 | 253347.62 | 319502.91  | 239245.63 | 823787.82  | 137945.85  |
| 150131.84  | 150370.77  | 136306.11  | 33750.05  | 28618.70  | 217773.06  | 37891.54  | 263579.59  | 113185.48  |
| 105271.69  | 99420.09   | 294813.70  | 159960.41 | 158385.32 | 142513.54  | 145117.76 | 74178.08   | 65623.99   |
| 36248.94   | 2830.82    | 1496.34    | 2025.53   | 1483.45   | 63903.50   | 4343.99   | 4577.21    | 29735.66   |
| 59048.49   | 3560.98    | 47121.52   | 2764.44   | 1762.24   | 62443.84   | 5383.97   | 6084.67    | 45621.99   |
| 29724.45   | 2385.22    | 1506.07    | 1936.97   | 1524.04   | 36347.15   | 4070.94   | 4308.42    | 18130.83   |
| 15881.79   | 1109.28    | 533.17     | 820.63    | 602.03    | 30559.98   | 1857.10   | 2216.14    | 14762.33   |
| 786778.57  | 777004.70  | 721561.95  | 307305.98 | 281436.61 | 1208612.96 | 317368.09 | 1270985.33 | 564099.25  |
| 41437.98   | 3144       | 1151.01    | 2286.25   | 1467.48   | 78802.51   | 4555.48   | 5387.51    | 41567.99   |
| 367487.92  | 405466.62  | 319509.24  | 162939.73 | 149673.16 | 491900.65  | 164002.88 | 658278.04  | 240058.65  |
| 98705.40   | 7181.34    | 2964.86    | 5792.70   | 3586.29   | 169949.79  | 13986.04  | 12480.84   | 102460.64  |
| 603366.52  | 675570.47  | 524878.34  | 318158.48 | 297907.85 | 851681.53  | 316525.05 | 1065437.19 | 371604.63  |
| 516224.49  | 830149.22  | 587569.72  | 486361    | 466040.53 | 859245.32  | 453952.92 | 1237885.60 | 389834.44  |
| 7096.43    | 743.38     | 2037.50    | 841.31    | 894.45    | 15133.27   | 998.55    | 1219.09    | 2048       |
| 0          | 9          | 17         | 29        | 3         | 971        | 68        | 37.67      | 25         |
| 624365.61  | 763325.23  | 544649.03  | 398195.28 | 376806.32 | 783779.73  | 381275.34 | 1168883.84 | 380154.65  |
| 2198470.39 | 1587353.29 | 1313137.26 | 823379.65 | 765521.95 | 3267484.73 | 850397.34 | 2473756.78 | 1888188.10 |
| 84293.62   | 6000.33    | 2203.69    | 4629.85   | 2979.29   | 155287.67  | 10041.29  | 11510.69   | 91701.31   |
| 129365.31  | 157190.66  | 135754.41  | 54855.29  | 49638.79  | 172946.54  | 54884.19  | 258019.77  | 90533.32   |
| 49631.62   | 44824.31   | 30888.08   | 25560.40  | 24199.95  | 66747.10   | 25217.90  | 67043.95   | 30615.83   |
| 24294.69   | 2084.66    | 77286.52   | 1647.91   | 945.15    | 45481      | 2213.65   | 3592.73    | 14292.33   |
| 1044789.03 | 1462531.71 | 1033618.59 | 882837.06 | 843990.61 | 1416332.09 | 823796.68 | 2147242.83 | 588447.64  |
| 73055.21   | 127939.28  | 90235.66   | 71767.41  | 68728.45  | 71461      | 66261.13  | 189133.68  | 32348.17   |

|           |            |           |           |           |            |           |            |           |
|-----------|------------|-----------|-----------|-----------|------------|-----------|------------|-----------|
| 750008.35 | 1056694.98 | 745853.76 | 618778    | 589989.70 | 1000350.53 | 580944.24 | 1561774.51 | 447705.16 |
| 120532.83 | 214927.35  | 150099.88 | 121623.13 | 116094.74 | 156514.88  | 111978.87 | 319319.54  | 65566     |
| 15445.15  | 33675.09   | 30033.67  | 1462.18   | 554.79    | 25836.97   | 2404.19   | 62644.83   | 2391.85   |
| 38194.77  | 85705.24   | 60293.15  | 48631.10  | 46419.10  | 44341.26   | 44120.42  | 127628.03  | 18407.83  |
| 42855.64  | 2817.33    | 1043.68   | 2311.60   | 1502.81   | 76415.16   | 5473.81   | 6068.18    | 50125.32  |
| 30426.32  | 2426.32    | 16230.68  | 1927.52   | 1292.89   | 45656.71   | 4471.49   | 3804.02    | 38053.99  |
| 49430.29  | 44081.72   | 61389.92  | 25164.28  | 24092.87  | 61575.85   | 24179.11  | 67619.68   | 30977     |
| 470138.12 | 726564.53  | 512975.84 | 394771.48 | 375328.62 | 633662.94  | 368757.50 | 1094604.63 | 289655.98 |
| 239676.48 | 135932.90  | 99335.20  | 65136.76  | 59092.42  | 353939.54  | 76596.40  | 221716.61  | 203303.80 |
| 699569.95 | 536904.40  | 404724.55 | 292892.29 | 272785.90 | 1115628.05 | 301442.47 | 827603.93  | 583974.22 |
| 0         | 0          | 0         | 0         | 0         | 0          | 0         | 0          | 0         |
| 718430.38 | 247847.71  | 175129.50 | 216614.44 | 203374.46 | 1126091.73 | 239350.82 | 340825.04  | 646804.19 |
| 8192.16   | 8677.62    | 598.07    | 22121.50  | 22065.46  | 5612.97    | 19338.57  | 667.50     | 626.67    |
| 14029     | 882.84     | 365.50    | 705.17    | 345.66    | 12522.17   | 907.16    | 1303.67    | 2307      |
| 158400.59 | 137020.73  | 94719.14  | 79132.33  | 74030.16  | 238086.60  | 77759.90  | 205072.71  | 103331.99 |
| 0         | 0          | 0         | 0         | 0         | 0          | 0         | 0          | 0         |
| 0         | 0          | 2         | 0         | 0         | 748        | 0         | 0          | 25        |
| 6307.70   | 74172.45   | 103710.42 | 23972.25  | 22447.10  | 9383.97    | 20114.75  | 122366.08  | 435       |
| 204361.41 | 88444.79   | 78960.46  | 35133.54  | 29684.55  | 353128.42  | 45297.04  | 146113.54  | 190129.12 |
| 95737.86  | 6622.96    | 18635.69  | 4873.71   | 3556.08   | 155633.64  | 11933.39  | 12438.76   | 83760.48  |
| 0         | 0          | 2         | 0         | 0         | 748        | 0         | 0          | 25        |
| 91946.73  | 113859.45  | 90404.83  | 30402.27  | 26889.95  | 154077.93  | 32346.34  | 196797.28  | 74019.65  |
| 0         | 0          | 0         | 0         | 0         | 0          | 0         | 0          | 0         |
| 90441.80  | 14926.13   | 19236.26  | 26535.79  | 25380.55  | 122466.51  | 30628.92  | 13110.22   | 82583.48  |
| 281191.19 | 340467.59  | 243218.72 | 176169.48 | 166511.46 | 387018.46  | 170737.65 | 525039     | 173283.32 |
| 70292.93  | 38007.79   | 31520.35  | 4924.60   | 3189.53   | 114798.04  | 8602.14   | 71350.89   | 59945.49  |
| 38072.47  | 3359.10    | 2010.34   | 2632.34   | 1997.29   | 63709.62   | 5046.26   | 6114.73    | 31687.66  |
| 18598.32  | 1694.63    | 1085.17   | 1372.53   | 1215.28   | 24605.70   | 2492.05   | 3334.62    | 14981.83  |
| 69673.65  | 78273.62   | 74898.26  | 27276.85  | 24532.01  | 123515.38  | 27420.83  | 129566.63  | 59579.82  |
| 575821.35 | 51742.20   | 34635.29  | 54649.10  | 45813.99  | 892554.04  | 85163.31  | 80495.20   | 551772.55 |
| 286065.77 | 310441.44  | 215794.55 | 177745.97 | 168591.66 | 374231.32  | 173486.82 | 464467.45  | 173430.49 |
| 225836.22 | 15648.86   | 37052.56  | 11725.31  | 8009.53   | 390995.48  | 27535.34  | 28256.24   | 212113.28 |
| 296003.77 | 21827.38   | 12042.56  | 16449.97  | 11455.13  | 428807.07  | 33165.74  | 37254.82   | 259660.94 |
| 545745.12 | 774447.24  | 546621.99 | 423618.54 | 402156.26 | 725106.52  | 399701.22 | 1168399.17 | 340582.98 |





|           |           |            |           |           |            |           |            |           |
|-----------|-----------|------------|-----------|-----------|------------|-----------|------------|-----------|
| 147917.29 | 174504.64 | 121789.78  | 98705.18  | 94405.17  | 205620.53  | 94643.40  | 262899.19  | 93248.66  |
| 229617.36 | 349786.49 | 228429.28  | 199939.79 | 190218.24 | 330573.30  | 187137.08 | 526625.83  | 135009.47 |
| 415508.12 | 613581.05 | 474271.87  | 366383.45 | 349613.82 | 411947.18  | 340829.11 | 903466.38  | 157688.50 |
| 0         | 184       | 28         | 0         | 80        | 6504       | 0         | 68         | 0         |
| 187152.52 | 138557.87 | 111727.68  | 80569.02  | 75694.68  | 259745.30  | 83102.02  | 210670.95  | 119606.48 |
| 851385.11 | 1315308   | 1032870.92 | 537669.41 | 500068.55 | 1059726.07 | 513428.48 | 2109716.44 | 476191.29 |
| 616514.32 | 668188.85 | 569740.01  | 398855.53 | 379894.51 | 828016.25  | 386847.16 | 992133.40  | 369103.32 |
| 353581.10 | 126937.08 | 99809.56   | 25385.20  | 16008.53  | 592816.45  | 49934     | 230853.05  | 359878.42 |
| 731609.42 | 598233.86 | 435411.09  | 276474.14 | 255090.43 | 1315167.38 | 291116.30 | 951601.29  | 615640.07 |
| 88082.22  | 129018.67 | 76308.73   | 73170.80  | 69994.50  | 103145.19  | 70466.15  | 196940.86  | 59201.49  |
| 379255.81 | 595133.25 | 532845.10  | 509361.08 | 494201.54 | 262006.90  | 458534.19 | 761849.45  | 79624.17  |
| 10492.63  | 17899.29  | 2770.84    | 44712.05  | 44910.75  | 24297.72   | 39322.07  | 2480.38    | 3838      |
| 0         | 0         | 0          | 0         | 0         | 0          | 0         | 0          | 0         |
| 649672.29 | 497959.61 | 379913.94  | 114054.35 | 92404.98  | 1122935.74 | 138465.58 | 871410.39  | 543706.22 |
| 109350.98 | 236747.55 | 176976.98  | 98740.84  | 93002.40  | 143752.19  | 89880.52  | 377830.06  | 64952.82  |
| 172780.79 | 69361.99  | 126542.69  | 75728.79  | 71968.54  | 232672.82  | 77093.88  | 80018.04   | 111107.81 |
| 0         | 0         | 0          | 0         | 0         | 0          | 0         | 0          | 0         |
| 0         | 0         | 0          | 0         | 0         | 0          | 0         | 0          | 0         |
| 733727.57 | 741537.14 | 588539.50  | 234404.75 | 207666.53 | 1139981.76 | 250173.04 | 1248517.32 | 600886.22 |
| 2.50      | 10        | 10.50      | 0         | 0         | 773.50     | 0         | 110.50     | 25        |
| 33482.28  | 10718.27  | 1563.91    | 23752.99  | 23371.05  | 52433.19   | 23387.73  | 4996.60    | 27152.33  |

| D5         | D6         | D7         | D8         | D9         |
|------------|------------|------------|------------|------------|
| 0          | 0          | 1.20       | 0          | 0          |
| 682789.74  | 763676.66  | 811194.09  | 254202.32  | 744908.32  |
| 3606440.18 | 2615394.33 | 2790397.56 | 1346671.19 | 2635829.72 |
| 721985.16  | 614604.07  | 629468.74  | 256212.24  | 585945.64  |
| 68548.77   | 61869.19   | 59464.59   | 23066.96   | 54629.12   |
| 26804.79   | 28724.56   | 30300.06   | 20496.66   | 30565.45   |
| 327857.61  | 217538.64  | 220408.66  | 130932.47  | 234680.13  |
| 0          | 0          | 0          | 0          | 0          |
| 9055733.27 | 7767434.03 | 7399566.97 | 3403141.66 | 7185232.05 |
| 75643.59   | 72639.19   | 56467.02   | 60624.84   | 66774.05   |
| 178657.24  | 294015.70  | 283808.92  | 59142.11   | 239935.95  |
| 829550.65  | 777034.59  | 855642.73  | 141199.71  | 770297.22  |
| 2722.68    | 73032.38   | 74155.02   | 4220.18    | 50201.14   |
| 115730     | 81740.60   | 71520.91   | 24272.68   | 86884.20   |
| 102        | 6355       | 1287       | 153        | 3912.45    |
| 21770.46   | 28690.90   | 29857.73   | 2330.99    | 28853.12   |
| 1003883.85 | 560556.51  | 452669.23  | 298033.66  | 616369.30  |
| 644537.93  | 360192.60  | 339521.16  | 137968.24  | 396747.95  |
| 130830.58  | 280027.39  | 277202.02  | 36736.60   | 211952.41  |
| 62541.26   | 2623       | 9472.60    | 572.40     | 18253.80   |
| 400793.33  | 328639.48  | 369596.36  | 119977.68  | 325565.51  |
| 0          | 0          | 0          | 0          | 0          |
| 535099.57  | 408013.09  | 442509.32  | 223079.26  | 414962.67  |
| 2397236.97 | 1191989.02 | 1363130.96 | 387110.60  | 1446808.24 |
| 32339.36   | 85313.66   | 83465.79   | 5430.94    | 48487.25   |
| 0          | 0          | 0          | 0          | 0          |
| 399496.15  | 313836.18  | 337033.10  | 175722.49  | 313216.08  |
| 163980.61  | 157187.94  | 172915.59  | 31700.53   | 161657.46  |
| 179964.42  | 274853.28  | 255821.52  | 72675.24   | 236331.39  |
| 260236.37  | 518884.20  | 593531.30  | 49298.30   | 484229.39  |
| 318917.39  | 995649.79  | 884368     | 112062.63  | 732780.65  |
| 0          | 0          | 0          | 7          | 0          |
| 272        | 944        | 716.33     | 318        | 326        |

|            |            |            |           |            |
|------------|------------|------------|-----------|------------|
| 271970.51  | 577547.37  | 605339.36  | 58652.58  | 431597.04  |
| 0          | 0          | 0          | 0         | 0          |
| 614.13     | 3019.38    | 1693.23    | 1190.85   | 1155.40    |
| 996.47     | 21868.34   | 21965.57   | 1549.02   | 15333.45   |
| 143829.28  | 107135.39  | 70939.51   | 7529.69   | 94612.04   |
| 122854.18  | 31687.59   | 16497.91   | 97095.14  | 61309.49   |
| 20495.67   | 9398.03    | 9298.83    | 906.27    | 6979.50    |
| 2210338.61 | 1754569.22 | 1842303.97 | 747203.86 | 1758850.12 |
| 3451776.14 | 2002414.84 | 1985556.01 | 705526.93 | 2276049.64 |
| 0          | 0          | 0          | 0         | 0          |
| 224086.46  | 6670.79    | 14391.45   | 39049.71  | 67125.44   |
| 9304.82    | 18906.93   | 3185.73    | 916.10    | 4103.35    |
| 2722.68    | 73032.38   | 74155.02   | 4220.18   | 50201.14   |
| 0          | 0          | 0          | 0         | 0          |
| 360220.05  | 366321.51  | 338391.62  | 46796.77  | 350514.81  |
| 190564.13  | 136283.38  | 153926.54  | 30363.97  | 157979.13  |
| 225083.15  | 192035.46  | 212841.44  | 73599.22  | 183973.81  |
| 182813.66  | 139795.74  | 147965.93  | 67397.92  | 134748.40  |
| 0          | 0          | 0          | 0         | 0          |
| 48861.81   | 31910.41   | 35529.73   | 4546.99   | 31933.62   |
| 0          | 0          | 2310       | 1         | 180.67     |
| 806        | 187        | 9652       | 664.50    | 340        |
| 248977.19  | 292485.34  | 279828.69  | 20824.44  | 264407.01  |
| 1454787.09 | 1210528.31 | 1312334.41 | 414437.89 | 1251381.14 |
| 24025.68   | 76467.30   | 80649.88   | 5928.32   | 70473.80   |
| 826492.40  | 665661.58  | 731202.16  | 357115.62 | 665147.21  |
| 43387.30   | 47855.31   | 45546.69   | 6616.68   | 47448.90   |
| 546956.62  | 401969.91  | 444370.33  | 183745.88 | 401649.91  |
| 7198.89    | 8801.49    | 3783.83    | 706.67    | 11794.69   |
| 275230.37  | 309271.45  | 295874.72  | 76798.80  | 283903.56  |
| 55221.33   | 132032.62  | 135816.48  | 8758.21   | 102608.83  |
| 100403.05  | 8584.20    | 2730.49    | 1066.22   | 33739.47   |
| 121088.73  | 89430.10   | 102876.38  | 45847.90  | 93683.96   |
| 2722.68    | 73032.38   | 74155.02   | 4220.18   | 50201.14   |

|            |            |            |            |            |
|------------|------------|------------|------------|------------|
| 0          | 0          | 0          | 6          | 0          |
| 344525.33  | 247922.48  | 286518.06  | 116855.64  | 259363.07  |
| 599567.65  | 576306.79  | 621082.66  | 294627.94  | 574512.39  |
| 344068.55  | 114078.29  | 94451.12   | 8040.88    | 175972.32  |
| 35442.29   | 34596.34   | 29125.63   | 21711.37   | 36635.39   |
| 65103.26   | 63951.92   | 64378.94   | 23518.58   | 62556.34   |
| 363807.15  | 311081.50  | 309040.52  | 57796.23   | 320273.08  |
| 3335.98    | 90570.14   | 84886.91   | 4805.95    | 61953.93   |
| 0          | 0          | 0          | 0          | 0          |
| 0          | 0          | 0          | 0          | 0          |
| 1015785.16 | 1193163.91 | 1219961.13 | 253150.69  | 1041202.02 |
| 32942.80   | 188884.30  | 158366.93  | 10229.18   | 121242.52  |
| 79913.44   | 172110.59  | 186414.75  | 30612.64   | 136558.25  |
| 603136.11  | 485998.06  | 478692.49  | 228390.90  | 482668.49  |
| 168254.49  | 99553.37   | 105034.59  | 27324.42   | 126517.12  |
| 925226.60  | 1074952.52 | 1120535.03 | 114597.55  | 992523.16  |
| 3590238.96 | 2524764.47 | 2856377.77 | 805346.43  | 2729306.28 |
| 93335.99   | 67675.06   | 62790.85   | 23984.23   | 71572.51   |
| 1003797.19 | 973785.96  | 981044.19  | 301916.12  | 902639.24  |
| 236278.26  | 448451.23  | 394810.31  | 81707.73   | 321334.11  |
| 61792.11   | 93810.25   | 72405.19   | 24680.92   | 68551.45   |
| 44116.62   | 34960.50   | 35111.96   | 21705.37   | 36019.39   |
| 658811.67  | 510726.93  | 538969.64  | 129939.81  | 534965.67  |
| 23         | 4          | 3          | 28         | 7          |
| 0          | 0          | 0          | 6          | 0          |
| 4252437.61 | 4683612.62 | 4761426.50 | 1319649.27 | 4046984.52 |
| 46496.87   | 195677.03  | 152034.32  | 9751.23    | 139897.80  |
| 5111       | 85.70      | 1771.83    | 18252.42   | 2230.61    |
| 30728.19   | 30309.34   | 31803.73   | 2205.04    | 23554.57   |
| 234996.24  | 392161.02  | 427289.43  | 65518.29   | 321625.80  |
| 3615.40    | 33539.08   | 37885.10   | 3447.41    | 30883.24   |
| 2396262.91 | 1803067.77 | 1868514.34 | 1133105.18 | 1779357.77 |
| 0          | 0          | 0          | 0          | 0          |
| 402305.69  | 83606.84   | 90684.50   | 9906.02    | 162199.22  |

|            |            |            |            |            |
|------------|------------|------------|------------|------------|
| 702926.72  | 555222.20  | 586791.82  | 271954.58  | 547025.03  |
| 236        | 528        | 35         | 216        | 15         |
| 1335970.85 | 966032.85  | 995163.41  | 569371.23  | 994642.65  |
| 46.67      | 853        | 2317       | 34         | 186.62     |
| 0          | 0          | 0          | 2          | 0          |
| 378705.49  | 272165.83  | 376140.25  | 180634.38  | 301014.36  |
| 0          | 0          | 0          | 0          | 0          |
| 700.80     | 5589.58    | 2234.23    | 1340.85    | 1173.35    |
| 2722.68    | 73032.38   | 74155.02   | 4220.18    | 50201.14   |
| 26587.27   | 72777.27   | 74567.26   | 5420.18    | 57019.92   |
| 26         | 18.33      | 7          | 53         | 4.45       |
| 271.17     | 3371       | 1514       | 842        | 6064.50    |
| 124137.09  | 272631.01  | 257263.21  | 56858.49   | 192910.15  |
| 1057591.16 | 930495.81  | 950738.55  | 221228.54  | 871389.75  |
| 1310052.47 | 1066309.69 | 1042244.07 | 209636.53  | 1098520.12 |
| 1146024.12 | 1570618.77 | 1658637.87 | 275070.86  | 1401326.91 |
| 29585.22   | 3042       | 4230.16    | 1391.27    | 7106.62    |
| 1576140.50 | 822894.06  | 735805.39  | 688599.37  | 922198.66  |
| 1238658.37 | 942172.62  | 1022952.52 | 206179.20  | 964897.63  |
| 159971.90  | 146828.16  | 149451.72  | 87692.90   | 162564.80  |
| 87616.18   | 174498.55  | 172601.78  | 30593.79   | 117648.97  |
| 4941064.48 | 3807632.75 | 3939766.32 | 1477900.37 | 3852512.39 |
| 2835512.77 | 2055171.52 | 2176264.39 | 1106465.57 | 2070530.21 |
| 1334.94    | 23160.12   | 24096.97   | 1610.58    | 16783.59   |
| 21049.73   | 26452.99   | 31487.21   | 1970.11    | 26847.28   |
| 5.67       | 0          | 2236       | 28         | 3          |
| 69547.11   | 29682.84   | 22256.59   | 92969.82   | 23395.82   |
| 530741.15  | 397075.90  | 340385.81  | 87092.31   | 402547.43  |
| 0          | 0          | 0          | 0          | 0          |
| 72916.04   | 80138.37   | 68285.07   | 23427.10   | 71048.71   |
| 443060.85  | 352711.28  | 351929.58  | 28993.86   | 368606.28  |
| 274.47     | 799.97     | 4480.40    | 265.60     | 582.50     |
| 0          | 0          | 0          | 6          | 0          |
| 103388.99  | 25741.02   | 21312.65   | 43367.94   | 41946.56   |

|            |            |            |           |            |
|------------|------------|------------|-----------|------------|
| 522801.76  | 546238.79  | 596176.84  | 152169.07 | 495279.75  |
| 3          | 0          | 0          | 10        | 0          |
| 29642.22   | 3151       | 3583.83    | 1455.27   | 6628.45    |
| 11         | 557        | 0          | 12        | 0          |
| 1921.94    | 37583.97   | 38403.78   | 2805.50   | 17817.78   |
| 529697.65  | 422221.36  | 444908.22  | 202129.58 | 398013.27  |
| 1053735.83 | 698765.34  | 756188.42  | 437736.79 | 729872.21  |
| 172203.78  | 152611.11  | 178494.37  | 49422.95  | 148011.63  |
| 997354.75  | 824423.89  | 966312.03  | 354087.53 | 839116.34  |
| 503221.13  | 555999.90  | 596770.88  | 267091.36 | 514261.30  |
| 105704.58  | 189007.01  | 214800.72  | 51927.92  | 148829.99  |
| 1900385.48 | 1617613.66 | 1705534.29 | 655998.96 | 1634125.69 |
| 0          | 0          | 0          | 12        | 1.50       |
| 95001.54   | 55716.18   | 65532.22   | 24131.94  | 66994.65   |
| 14652      | 14080.88   | 8314.53    | 19320.17  | 10731.28   |
| 1605001.48 | 1258996.52 | 1352537.36 | 597012.74 | 1291043.36 |
| 73568.60   | 79153.71   | 87557.75   | 24185.51  | 65576.76   |
| 499787.99  | 439457.73  | 440181.14  | 151570.08 | 438244.85  |
| 1336031.58 | 1254066.72 | 1329989.31 | 451753.10 | 1193124.26 |
| 158534.26  | 229097.73  | 240047.92  | 73226.14  | 197446.78  |
| 2298.42    | 52889.28   | 29718.94   | 3266.14   | 30558.24   |
| 229016.29  | 273333.36  | 309546.48  | 61447.20  | 241378.16  |
| 2019594.20 | 1404145.79 | 1493870.32 | 944414.24 | 1450536.30 |
| 809662.49  | 955133.33  | 1066191.15 | 65760.63  | 947353.90  |
| 34714.53   | 15548.08   | 10169.93   | 3442.88   | 25392.33   |
| 130234.41  | 264693.68  | 263126.68  | 35769.43  | 201732.74  |
| 91306.40   | 188754.10  | 205226.98  | 31009.09  | 153227.60  |
| 90737.13   | 14179.63   | 13129.68   | 56933.05  | 20550.02   |
| 804882.57  | 563746.66  | 581147.27  | 212936.53 | 579749.36  |
| 888907.56  | 548614.61  | 570052.26  | 43460.41  | 646346.71  |
| 109913.12  | 269820.32  | 279950.85  | 39136.87  | 205086.47  |
| 5.67       | 0          | 0          | 24        | 1.50       |
| 267028.99  | 626170.68  | 581939.31  | 96822.66  | 489954.89  |
| 104646.39  | 54216.76   | 66178.32   | 24854.65  | 58488.36   |

|            |            |            |           |            |
|------------|------------|------------|-----------|------------|
| 0          | 0          | 0          | 0         | 0          |
| 62879.03   | 51140.48   | 49470.22   | 3819.46   | 54025.80   |
| 45959.27   | 20727.20   | 21936.86   | 38240.48  | 26475.40   |
| 10595.80   | 23077.01   | 41355.10   | 1785.48   | 17701.21   |
| 46556.04   | 208637.42  | 159208.51  | 10521.23  | 143423.82  |
| 495239.11  | 328355.22  | 341627.32  | 101616.47 | 335743     |
| 106500.37  | 145644.48  | 136377.04  | 13437.53  | 133536.93  |
| 335405.43  | 395900.21  | 424775.84  | 47563.77  | 351263.53  |
| 983940.04  | 743068.72  | 858868.28  | 406413.21 | 768091.93  |
| 38792.99   | 4938.63    | 10487.96   | 1743.93   | 11442.59   |
| 917350.47  | 766185.06  | 682845.45  | 358969.13 | 736687.44  |
| 425356.33  | 310739.85  | 327965.64  | 229755.13 | 297045.60  |
| 269491.73  | 213421.86  | 218015.82  | 35323.15  | 204236.58  |
| 103253.69  | 114350.65  | 138943.60  | 137810.38 | 104809.76  |
| 60191.64   | 52978.94   | 58978.39   | 3470.48   | 50776.62   |
| 3843.51    | 109164.21  | 81901.83   | 4432.68   | 55952.97   |
| 38974.06   | 33466.87   | 33620.60   | 4040.19   | 37114.86   |
| 21179.26   | 23056.67   | 26272.63   | 1682.55   | 22254.42   |
| 1104574.64 | 1083825    | 1213634.56 | 295469.67 | 1053948.31 |
| 3269.01    | 62239.57   | 71785.01   | 3920.01   | 44749.91   |
| 697185.68  | 458404.78  | 470974.76  | 151793.89 | 483161.04  |
| 66664.42   | 161072.87  | 158054.91  | 9938.44   | 119743.03  |
| 970754.47  | 755099.98  | 811516.09  | 295463.51 | 781592.24  |
| 897411.18  | 688943.26  | 794839.66  | 435345.78 | 723800.73  |
| 27395.76   | 16274.09   | 5036.43    | 1170.67   | 19082.37   |
| 20.67      | 1257       | 138        | 70        | 543.95     |
| 1315762.02 | 727527.15  | 780209.10  | 357659.45 | 799078.92  |
| 3537733.02 | 3126659.90 | 3191099.28 | 793579.87 | 3108139.13 |
| 6017.69    | 135285.95  | 145947.03  | 8189.19   | 94951.05   |
| 196226.67  | 172381.21  | 174097.92  | 49750.44  | 160888.86  |
| 74443.85   | 54408.69   | 58837.29   | 23875.81  | 54806.06   |
| 2049.50    | 26992.44   | 40665.67   | 2508.30   | 15449.69   |
| 1920410.26 | 1170951.17 | 1264137.36 | 775343.64 | 1270144.74 |
| 337142.41  | 61067.95   | 71577.64   | 62622.85  | 130581.94  |



|            |            |            |           |            |
|------------|------------|------------|-----------|------------|
| 1129268.58 | 910171.20  | 952261.96  | 545653.51 | 866294.79  |
| 189526.14  | 136976.81  | 141170.57  | 105092.36 | 131817.33  |
| 265734.63  | 15880.26   | 11414.18   | 3250.63   | 70186.86   |
| 89072.23   | 40275.30   | 35624.22   | 40524.67  | 52363.87   |
| 2722.68    | 73032.38   | 74155.02   | 4220.18   | 50201.14   |
| 1686.35    | 51102.86   | 52310.55   | 2886.01   | 37899.50   |
| 76672.89   | 64461.91   | 70227.33   | 23384.18  | 65413.39   |
| 728748.47  | 556916.97  | 591157.68  | 346329.71 | 549047.61  |
| 225608.61  | 325501.77  | 336952.40  | 67234.07  | 299529.19  |
| 783708.76  | 987374.34  | 1024790.01 | 280293.86 | 873667.76  |
| 0          | 0          | 0          | 0         | 0          |
| 1262740.30 | 1020850.82 | 1060137.49 | 221661.10 | 1078340.09 |
| 53027.85   | 7666.53    | 3152.99    | 18762.52  | 14706.20   |
| 9728.17    | 24646.50   | 15617.33   | 1129      | 4909.25    |
| 190812.07  | 234800.66  | 220740.71  | 74241.57  | 196612.07  |
| 0          | 0          | 0          | 2         | 0          |
| 0          | 0          | 0          | 0         | 0          |
| 33888.58   | 1944.56    | 8281.69    | 19296.14  | 8777.73    |
| 72038.23   | 300836.13  | 317297.23  | 37176.82  | 216317.50  |
| 61926.22   | 126591.38  | 130055.25  | 10998.64  | 104448.50  |
| 0          | 0          | 0          | 0         | 0          |
| 120358.69  | 130277.50  | 145345.12  | 31121.70  | 129365.53  |
| 0          | 0          | 0          | 2         | 0          |
| 259312.51  | 129253.82  | 143269.98  | 28518.60  | 158571.92  |
| 495930.56  | 329152.38  | 362977.30  | 160467.74 | 345318.99  |
| 94521.66   | 100240.40  | 114851.69  | 8036.13   | 97260.30   |
| 63210.69   | 65172.51   | 59116.09   | 5247.99   | 63027.50   |
| 21770.46   | 28690.90   | 29857.73   | 2330.99   | 28853.12   |
| 54301.26   | 105159.27  | 104799.66  | 25042.67  | 79002.59   |
| 473192.31  | 953907.20  | 934860.33  | 77032.66  | 812022.99  |
| 366121.55  | 347185.19  | 346366     | 162352.17 | 309091.98  |
| 116984.50  | 328180.64  | 358029.18  | 20911.41  | 251283.34  |
| 520137.19  | 412092.24  | 459736.93  | 30883.80  | 452369.47  |
| 871562.83  | 668792.63  | 679248.66  | 374305.66 | 659920.45  |

|            |            |            |           |            |
|------------|------------|------------|-----------|------------|
| 57002.76   | 158870.02  | 188573.83  | 46958.19  | 222986.13  |
| 196.80     | 3103.80    | 5458.73    | 131.10    | 476.12     |
| 2722.68    | 73032.38   | 74155.02   | 4220.18   | 50201.14   |
| 0          | 0          | 0          | 0         | 0          |
| 1130997.18 | 827483.83  | 884460.65  | 388362.80 | 866695.89  |
| 19986.90   | 7          | 20.20      | 186.40    | 5730       |
| 908240.43  | 629982.32  | 631423.26  | 480858.66 | 628240.01  |
| 626193.77  | 452028.56  | 474573.26  | 72079.54  | 474808.25  |
| 540185.15  | 450150.06  | 473373.03  | 188412.68 | 440489.49  |
| 982419.41  | 346742.35  | 267661.04  | 460982.21 | 458591.67  |
| 43.67      | 853        | 7          | 27        | 5.95       |
| 45581.91   | 103800.19  | 122029.21  | 7092.60   | 82455.92   |
| 165068.02  | 98359      | 100626.25  | 7447.67   | 117120.06  |
| 460521.75  | 514439.75  | 550527.81  | 228954.75 | 445623.35  |
| 21770.46   | 28690.90   | 29857.73   | 2330.99   | 28853.12   |
| 1036969.45 | 1110439.01 | 1190289.92 | 277061.32 | 1054179.69 |
| 831088.34  | 645256.91  | 635271.20  | 267282.70 | 655975.37  |
| 270217.02  | 256572.64  | 287189.08  | 38050.90  | 253155.01  |
| 3029440.54 | 2029602.84 | 2077516.96 | 608772.57 | 2147103.93 |
| 149028.37  | 91766.38   | 75885.91   | 43049.23  | 95993.04   |
| 161018.38  | 95076.66   | 96829      | 100642.91 | 101152.55  |
| 599509.86  | 443180.47  | 449893.05  | 243397.77 | 453882.21  |
| 160.01     | 4412.60    | 9539       | 271       | 1007.46    |
| 113916.74  | 63780.19   | 64747.97   | 24010.41  | 71337.06   |
| 11356.04   | 81821.91   | 48327.99   | 3813.18   | 41034.44   |
| 1872516.84 | 2642469.44 | 2882910.28 | 180229.89 | 2477406.69 |
| 541.67     | 12187.66   | 21206.34   | 777.67    | 10211      |
| 401680.51  | 792202.30  | 794448.09  | 93848.14  | 616575.31  |
| 504238.86  | 489827.09  | 517284.67  | 208629.88 | 446876.32  |
| 0          | 0          | 0          | 0         | 0          |
| 0          | 0          | 0          | 51        | 0          |
| 644216.50  | 754636.74  | 967859.97  | 140648.56 | 689225.51  |
| 0          | 0          | 0          | 0         | 0          |
| 0          | 0          | 0          | 0         | 0          |

|            |            |            |           |            |
|------------|------------|------------|-----------|------------|
| 258937.31  | 166405.30  | 187206.39  | 90705.54  | 195700.29  |
| 356520.30  | 247965.33  | 328800.02  | 177517.13 | 277712.57  |
| 1086131.47 | 417795.05  | 353594.73  | 314157.09 | 516452.92  |
| 0          | 0          | 8944       | 0         | 0          |
| 211787.23  | 233618.93  | 229278.47  | 78199.68  | 223768.06  |
| 1374261.03 | 955748.50  | 946361.06  | 474446.48 | 962470.03  |
| 1918956.53 | 691736.77  | 753916.11  | 365722.44 | 987158.14  |
| 401717.23  | 613631.57  | 574825.40  | 40060.74  | 515770.99  |
| 1458229.96 | 1023266.17 | 1093216.70 | 267986.30 | 1077499.33 |
| 365190.35  | 111266.91  | 98152.71   | 69168.48  | 171280     |
| 1353847.28 | 236646.24  | 156729.50  | 427147.02 | 435581.70  |
| 37893.79   | 13340.68   | 13020.89   | 38727.46  | 29343.32   |
| 0          | 0          | 0          | 0         | 0          |
| 351306.63  | 924194.94  | 994739.88  | 120331.91 | 700480.63  |
| 140283.67  | 115737.65  | 125570.07  | 83369.55  | 113531.61  |
| 131675.14  | 229096.57  | 216281.62  | 70281.99  | 169308.91  |
| 0          | 0          | 0          | 0         | 0          |
| 0          | 0          | 0          | 0         | 0          |
| 814175.01  | 1019395.32 | 1060005.67 | 224712.91 | 881377.58  |
| 63         | 14.50      | 276        | 49        | 29.50      |
| 35323.11   | 43327.25   | 52114.23   | 21480.20  | 38208.41   |
