# Supplementary material for: Bacterial Colonization in the Airways and Intestines of Twin and Singleton Preterm Neonates: A Single‐Center Study
Source: Hindawi journal article supplement (doi:10.1155/2023/2973605), 2023-01-01

We created stacked bar plots of groups A – D for abundance at the phylum, order, family, genus, and species levels. We constructed heat maps displaying the top 30 compositions for relative abundance.

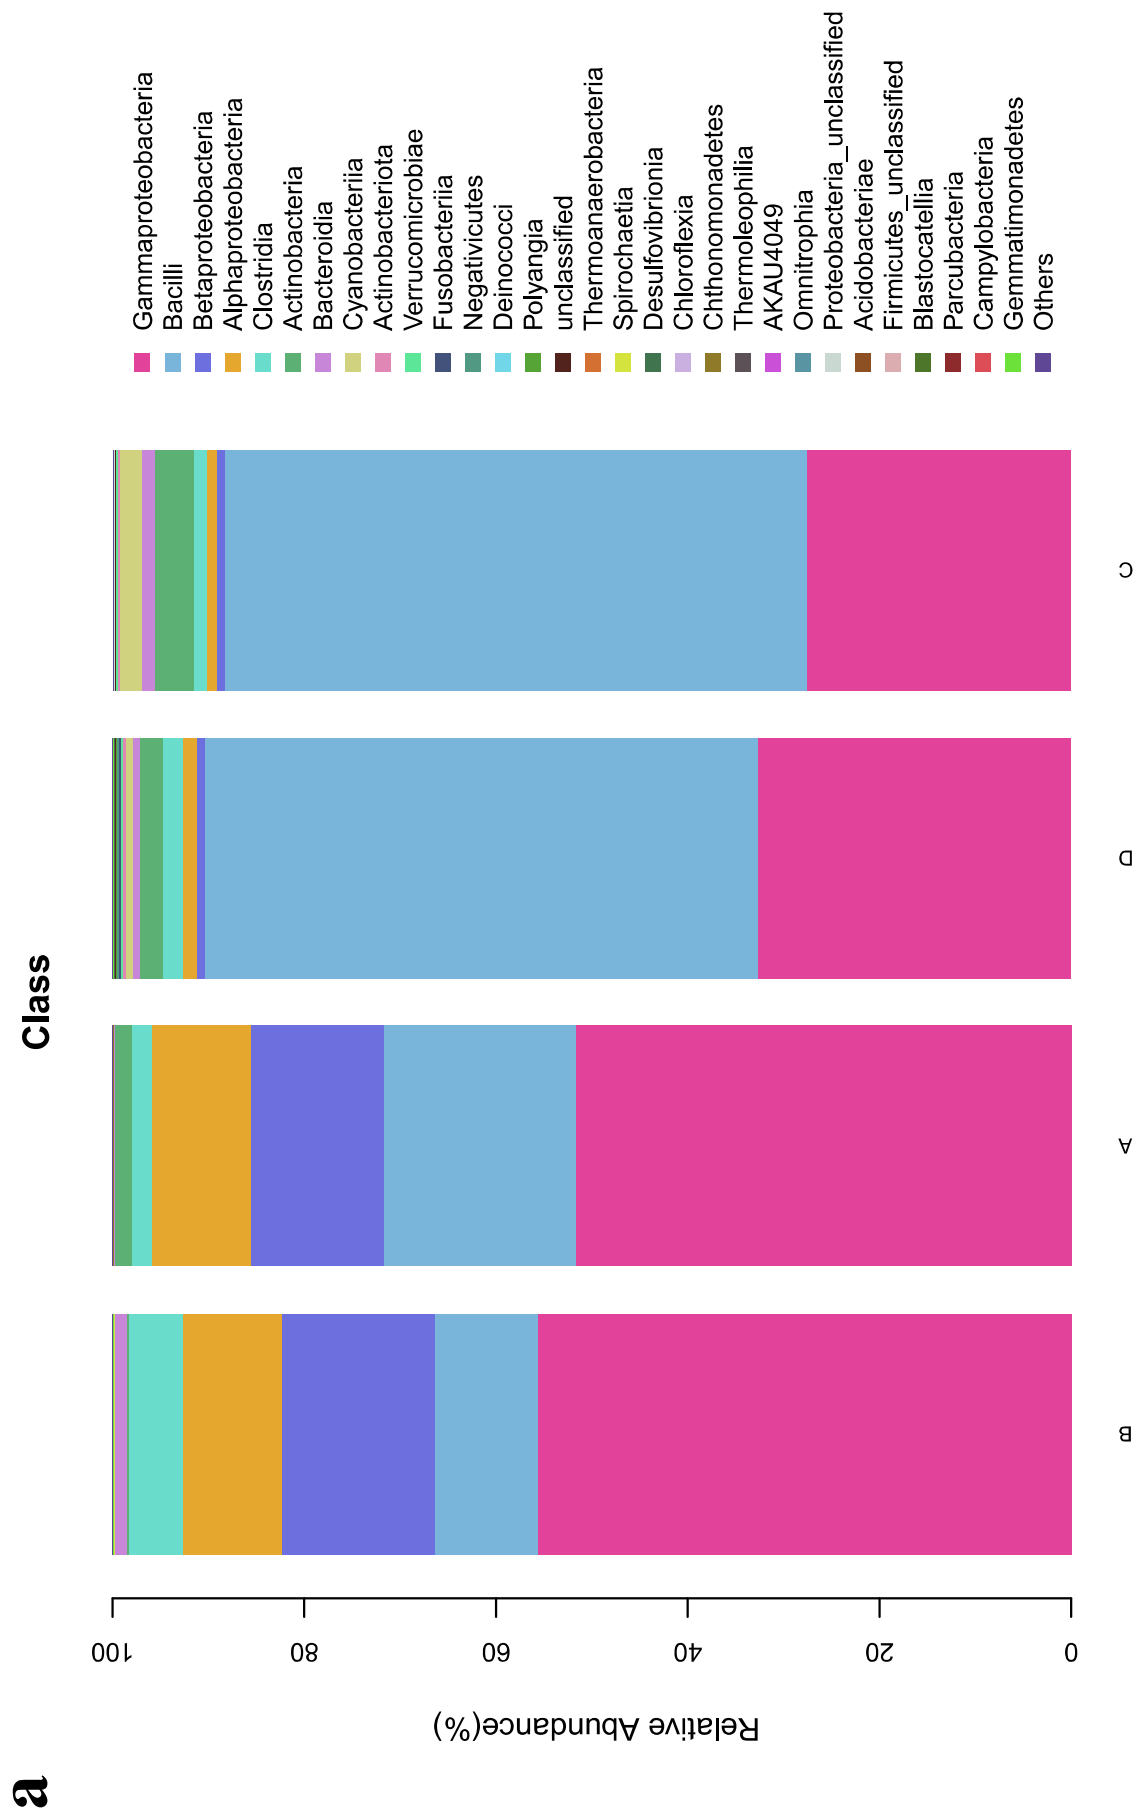

**b**

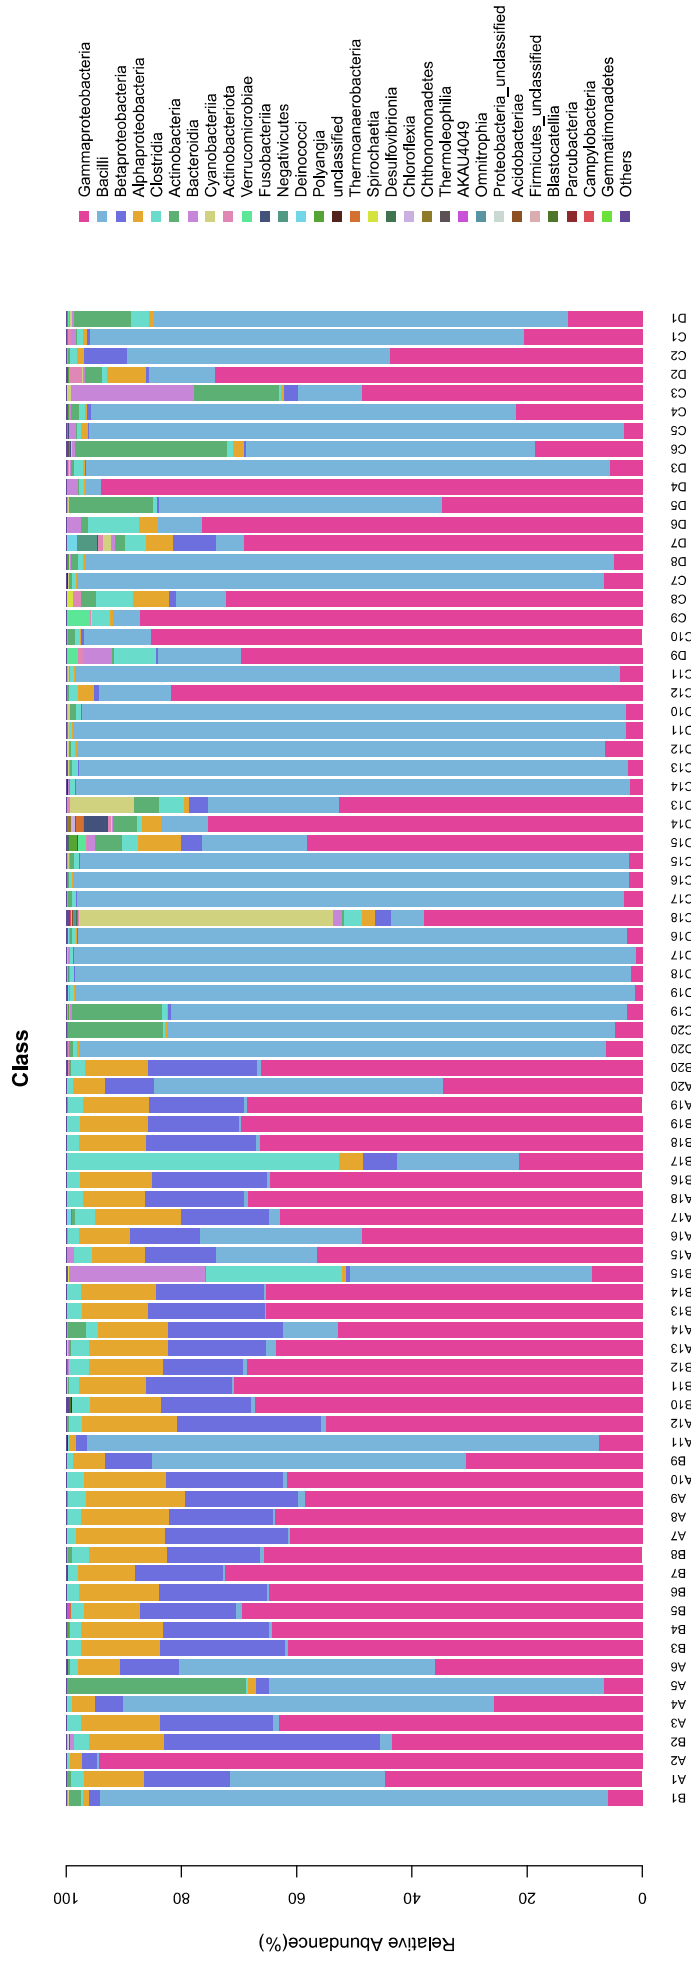

**c**

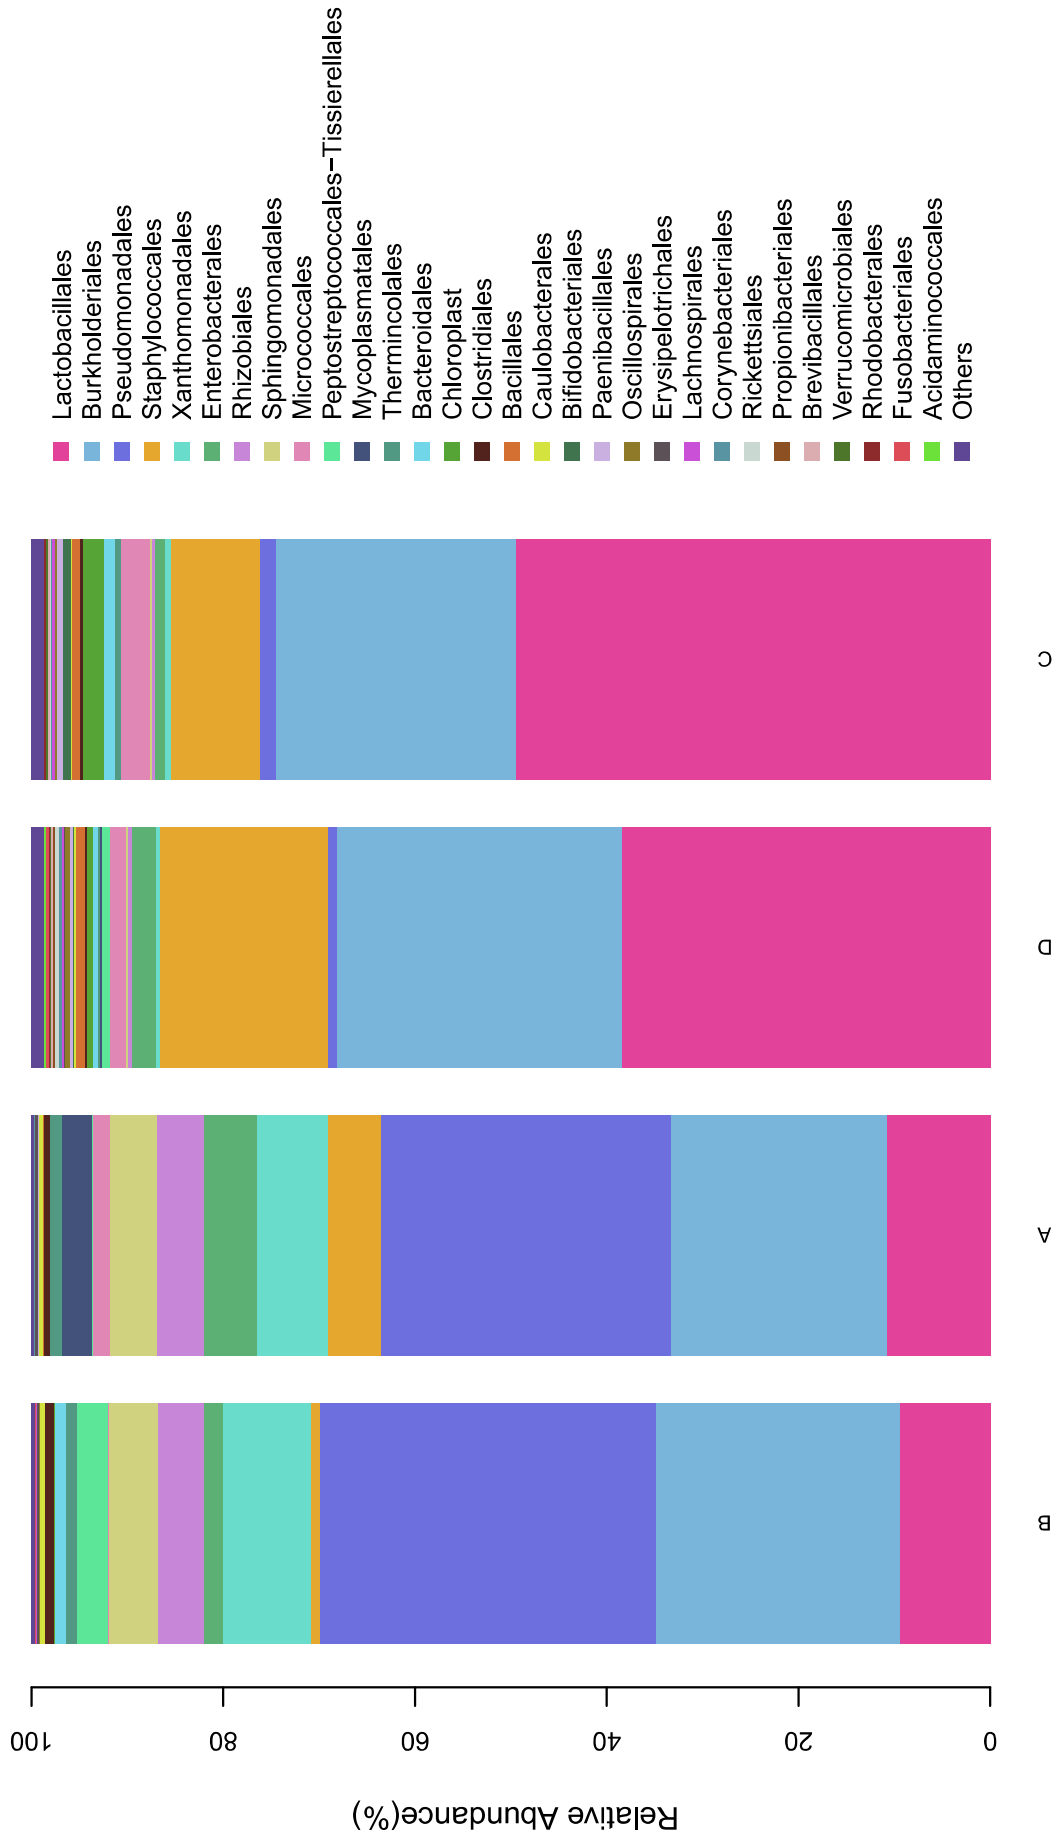

d

Order

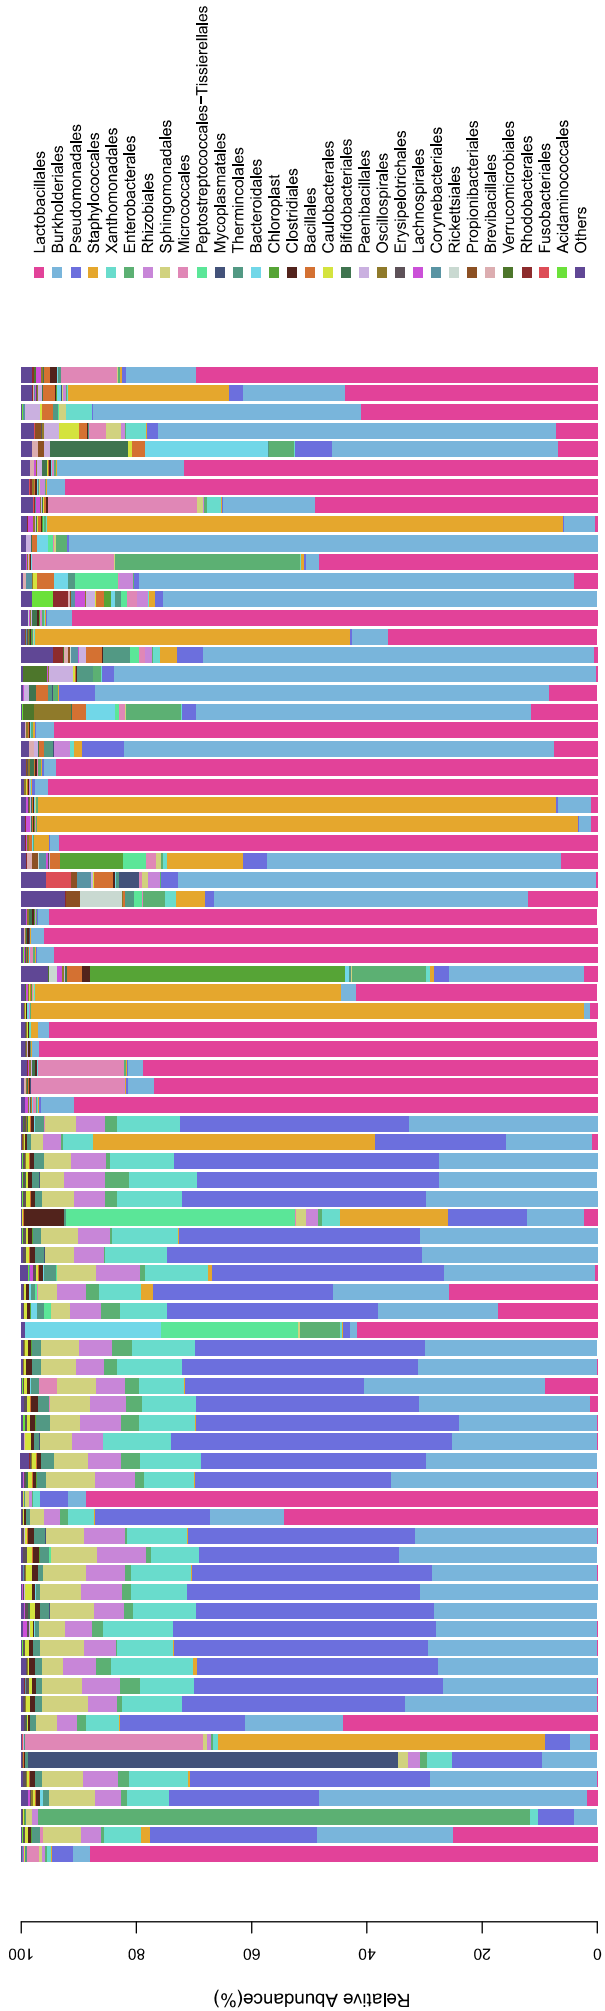

e

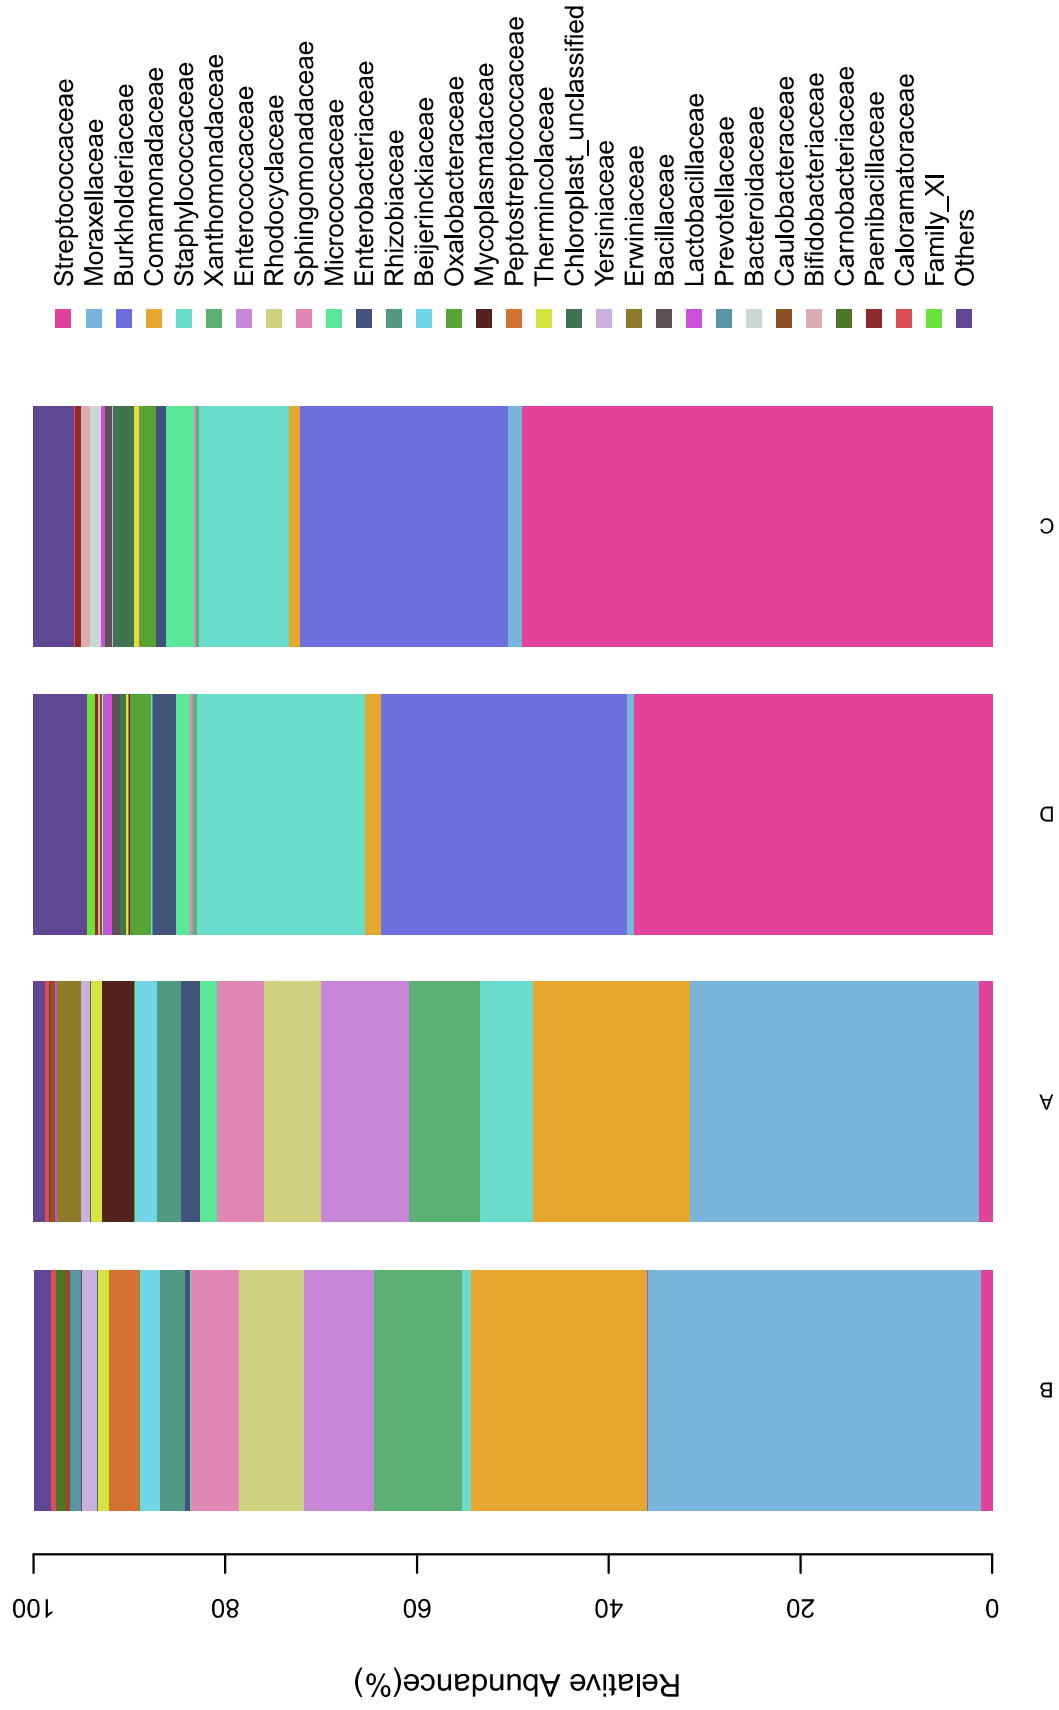

f

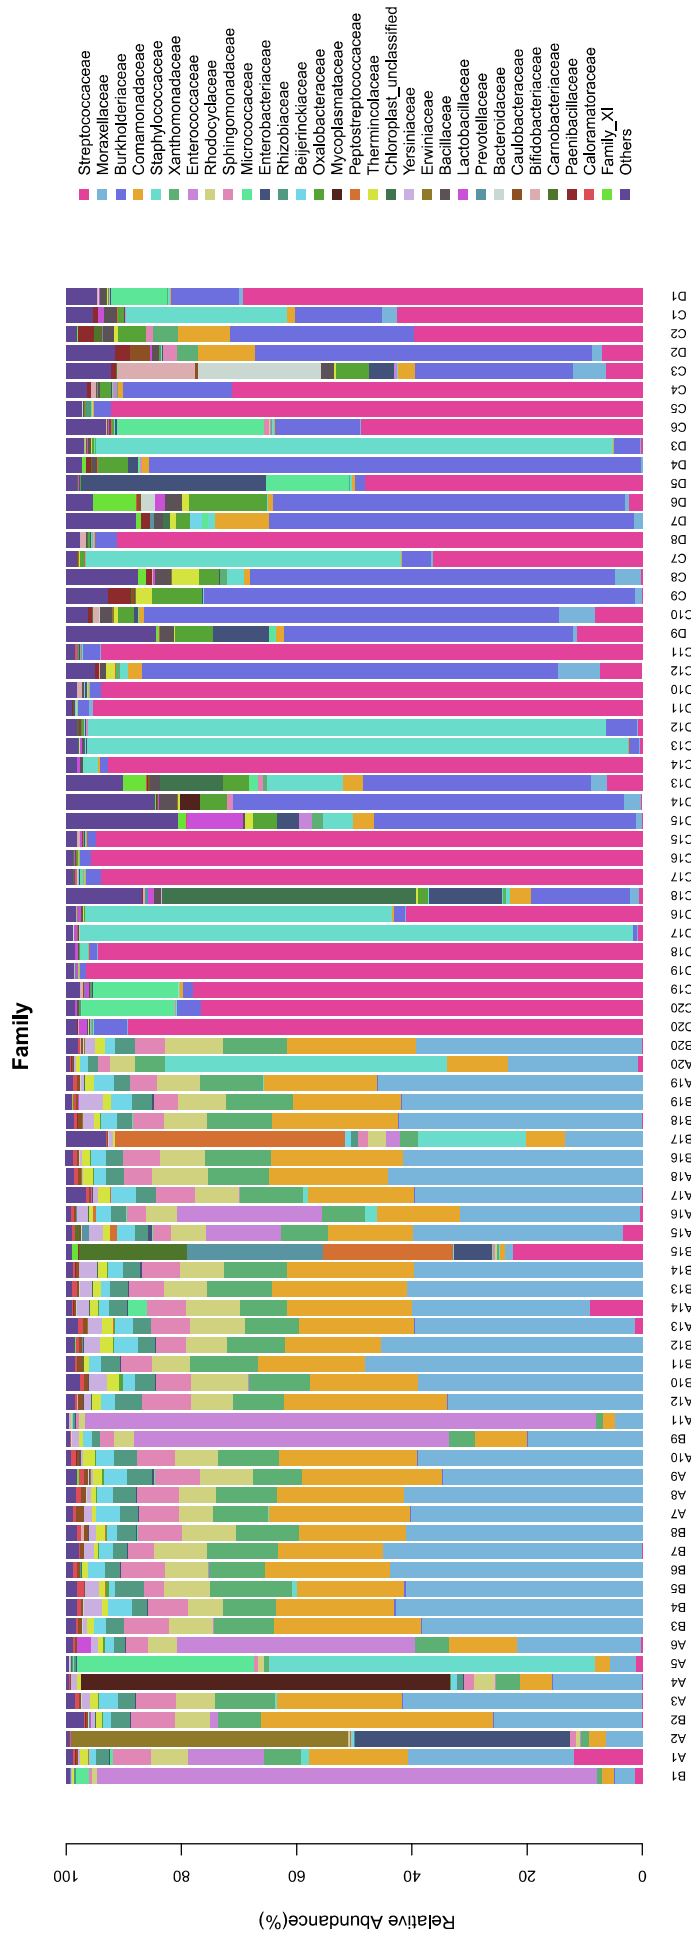

Species

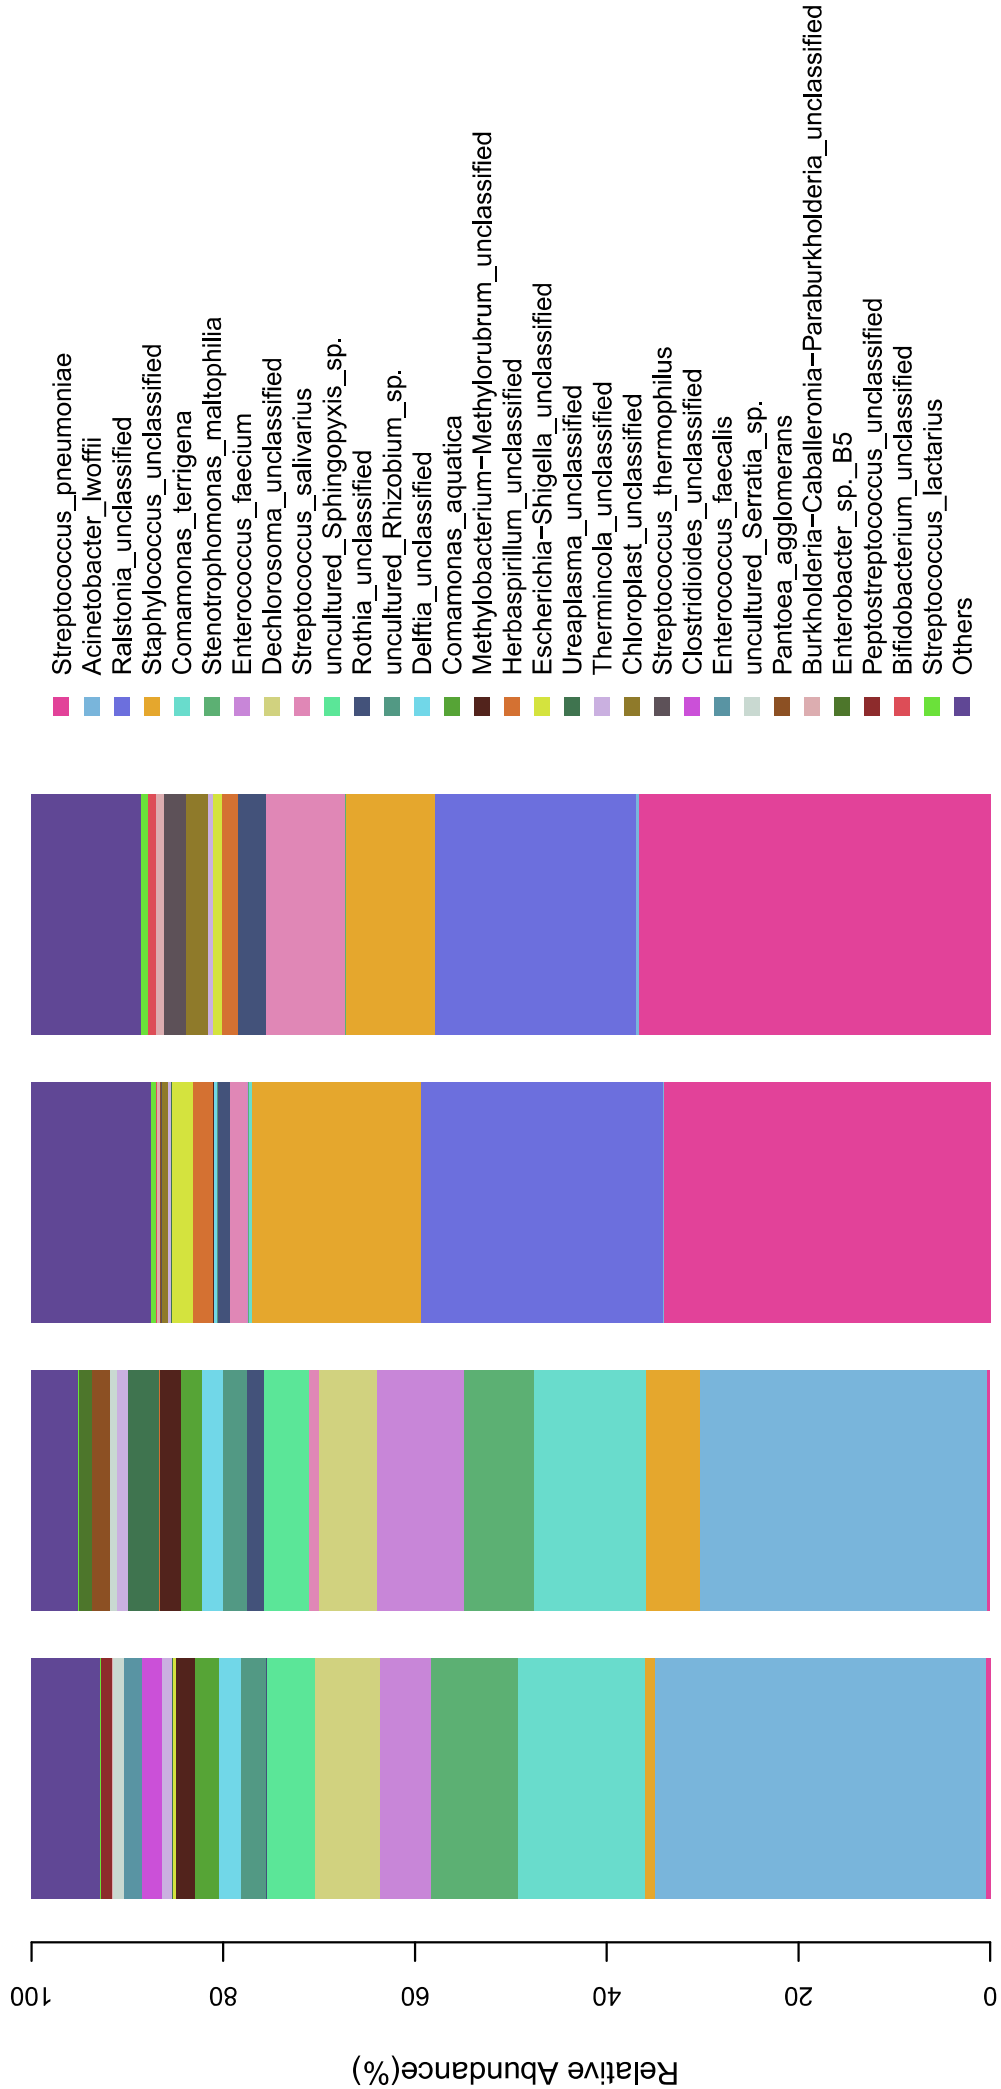

h

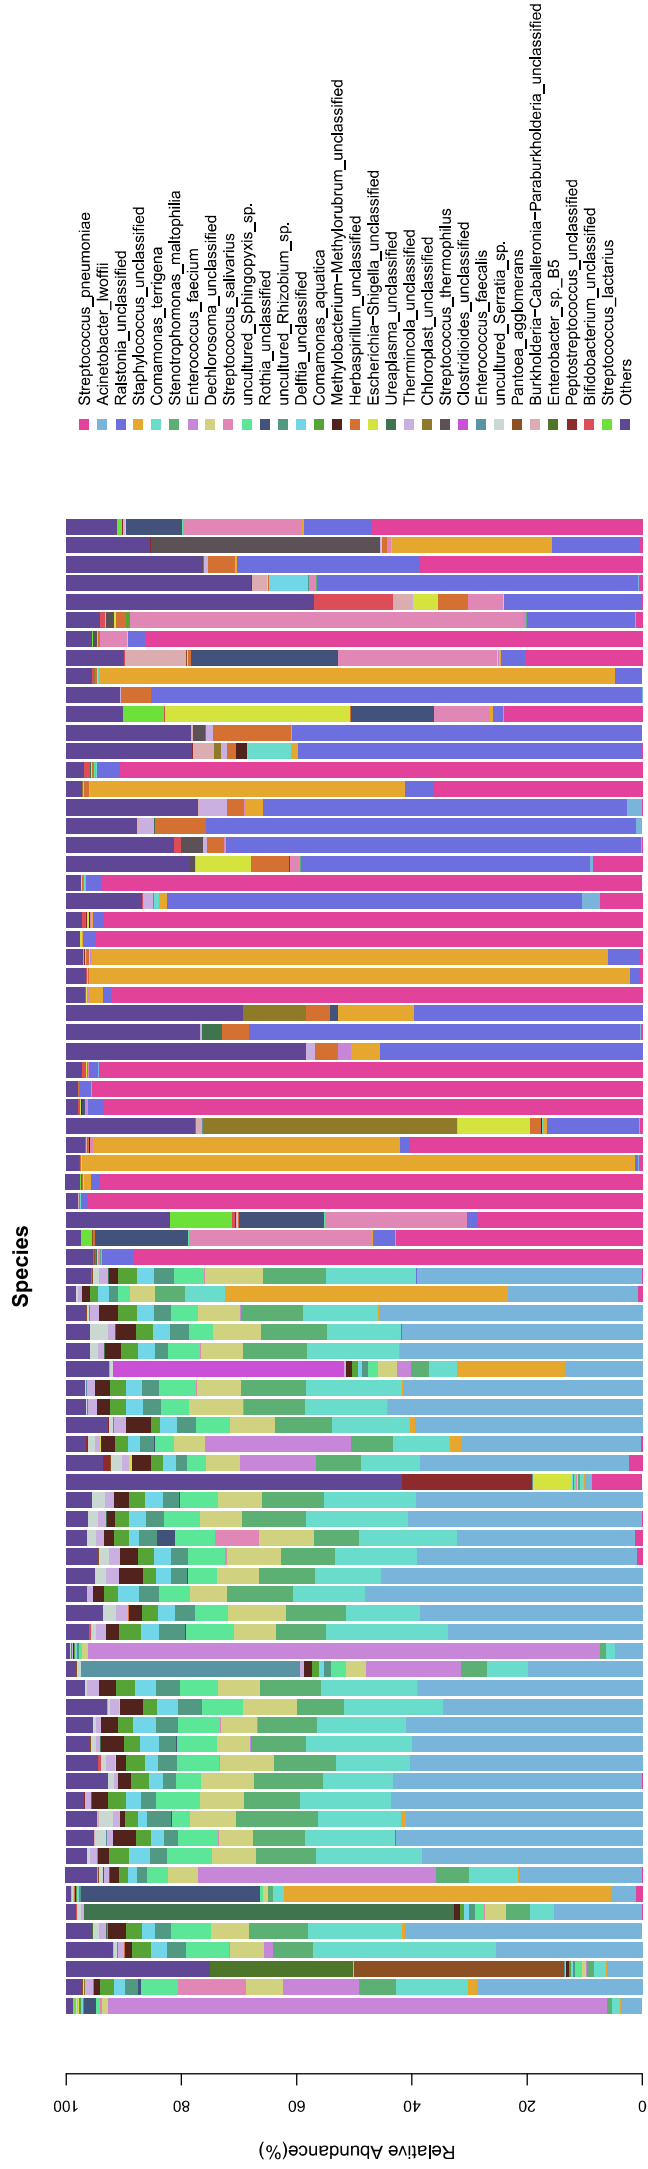



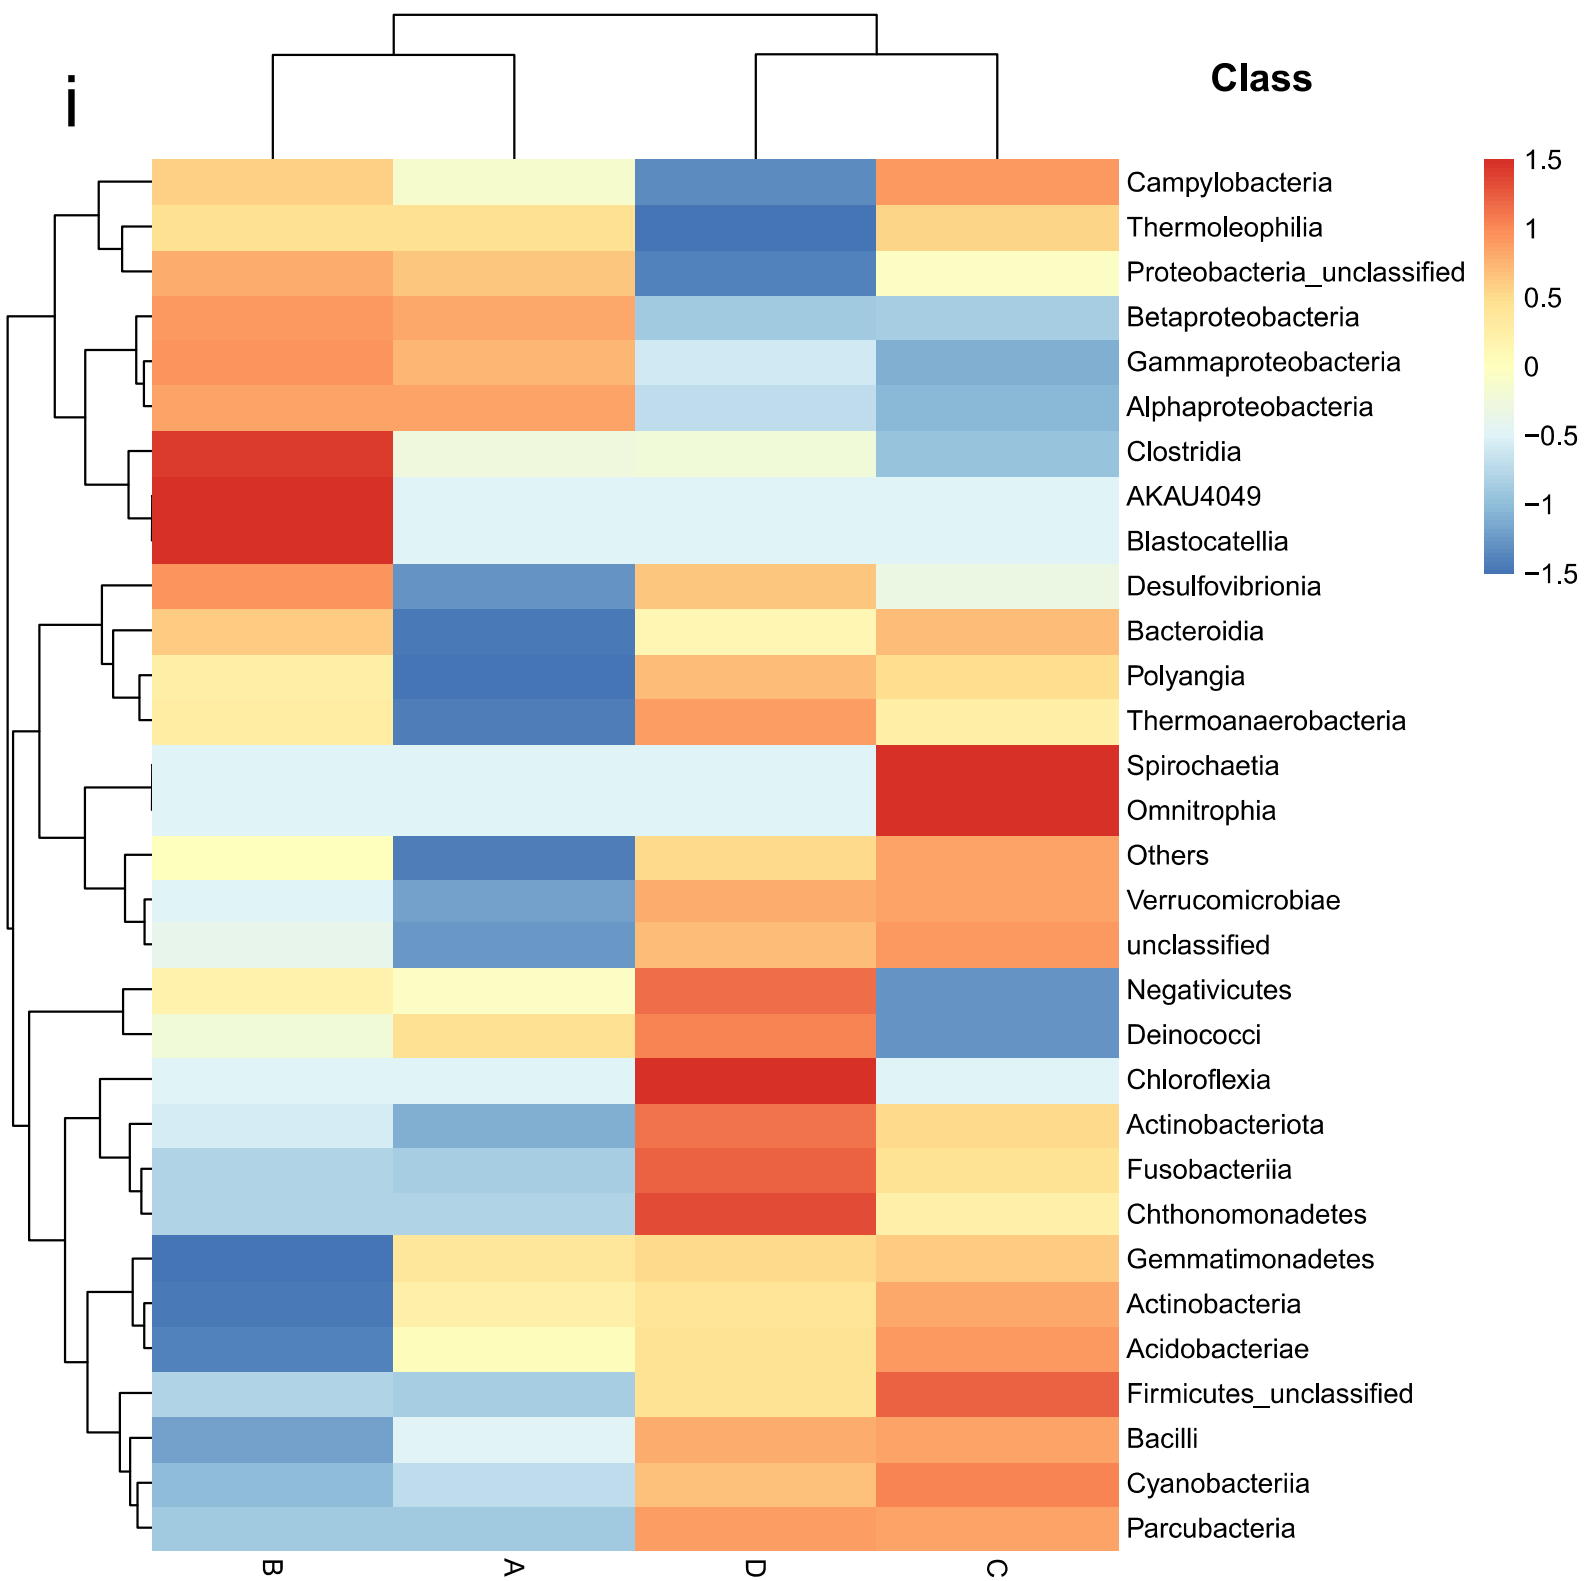

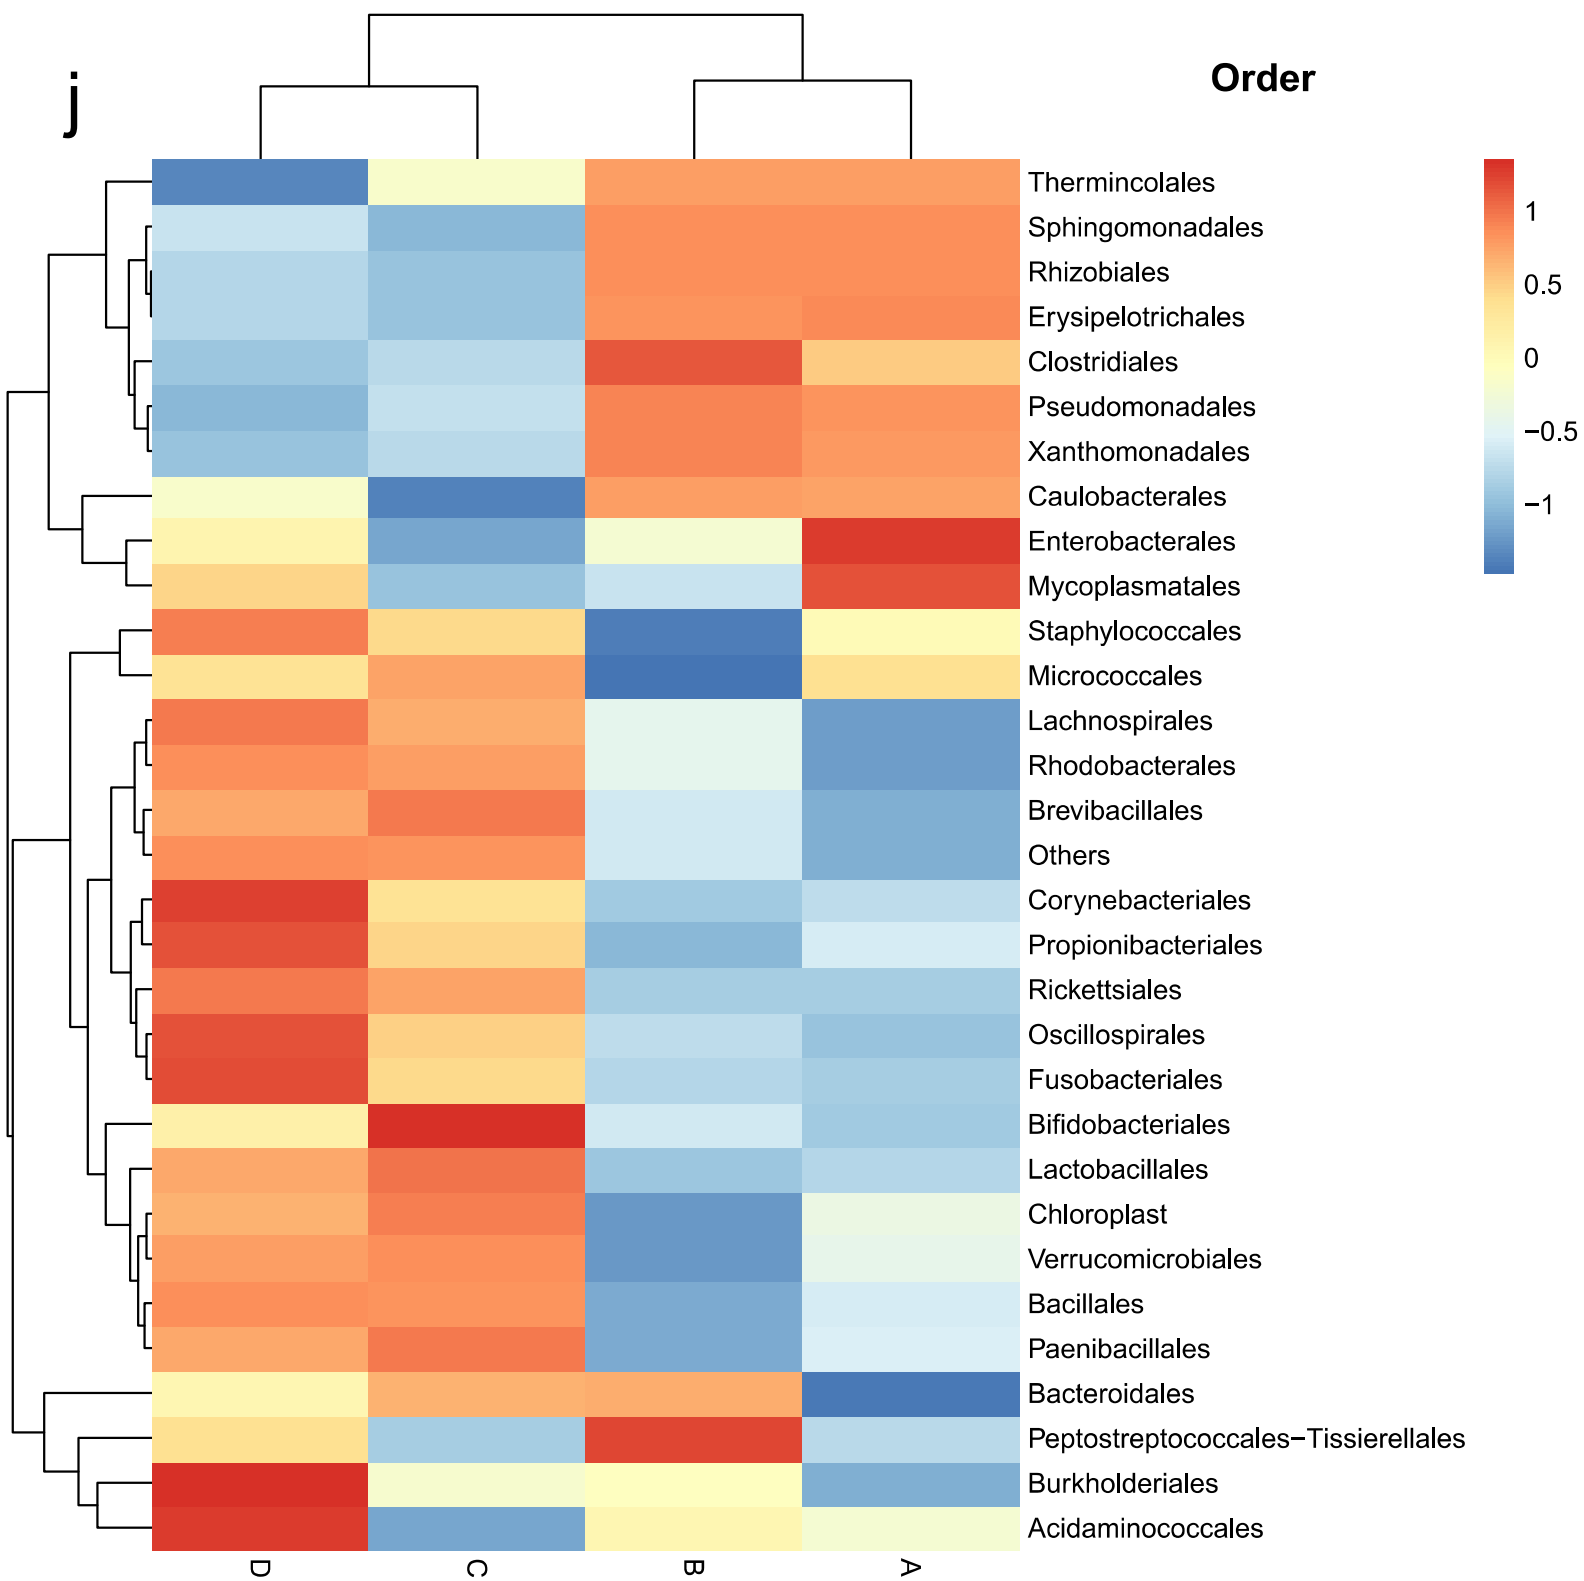

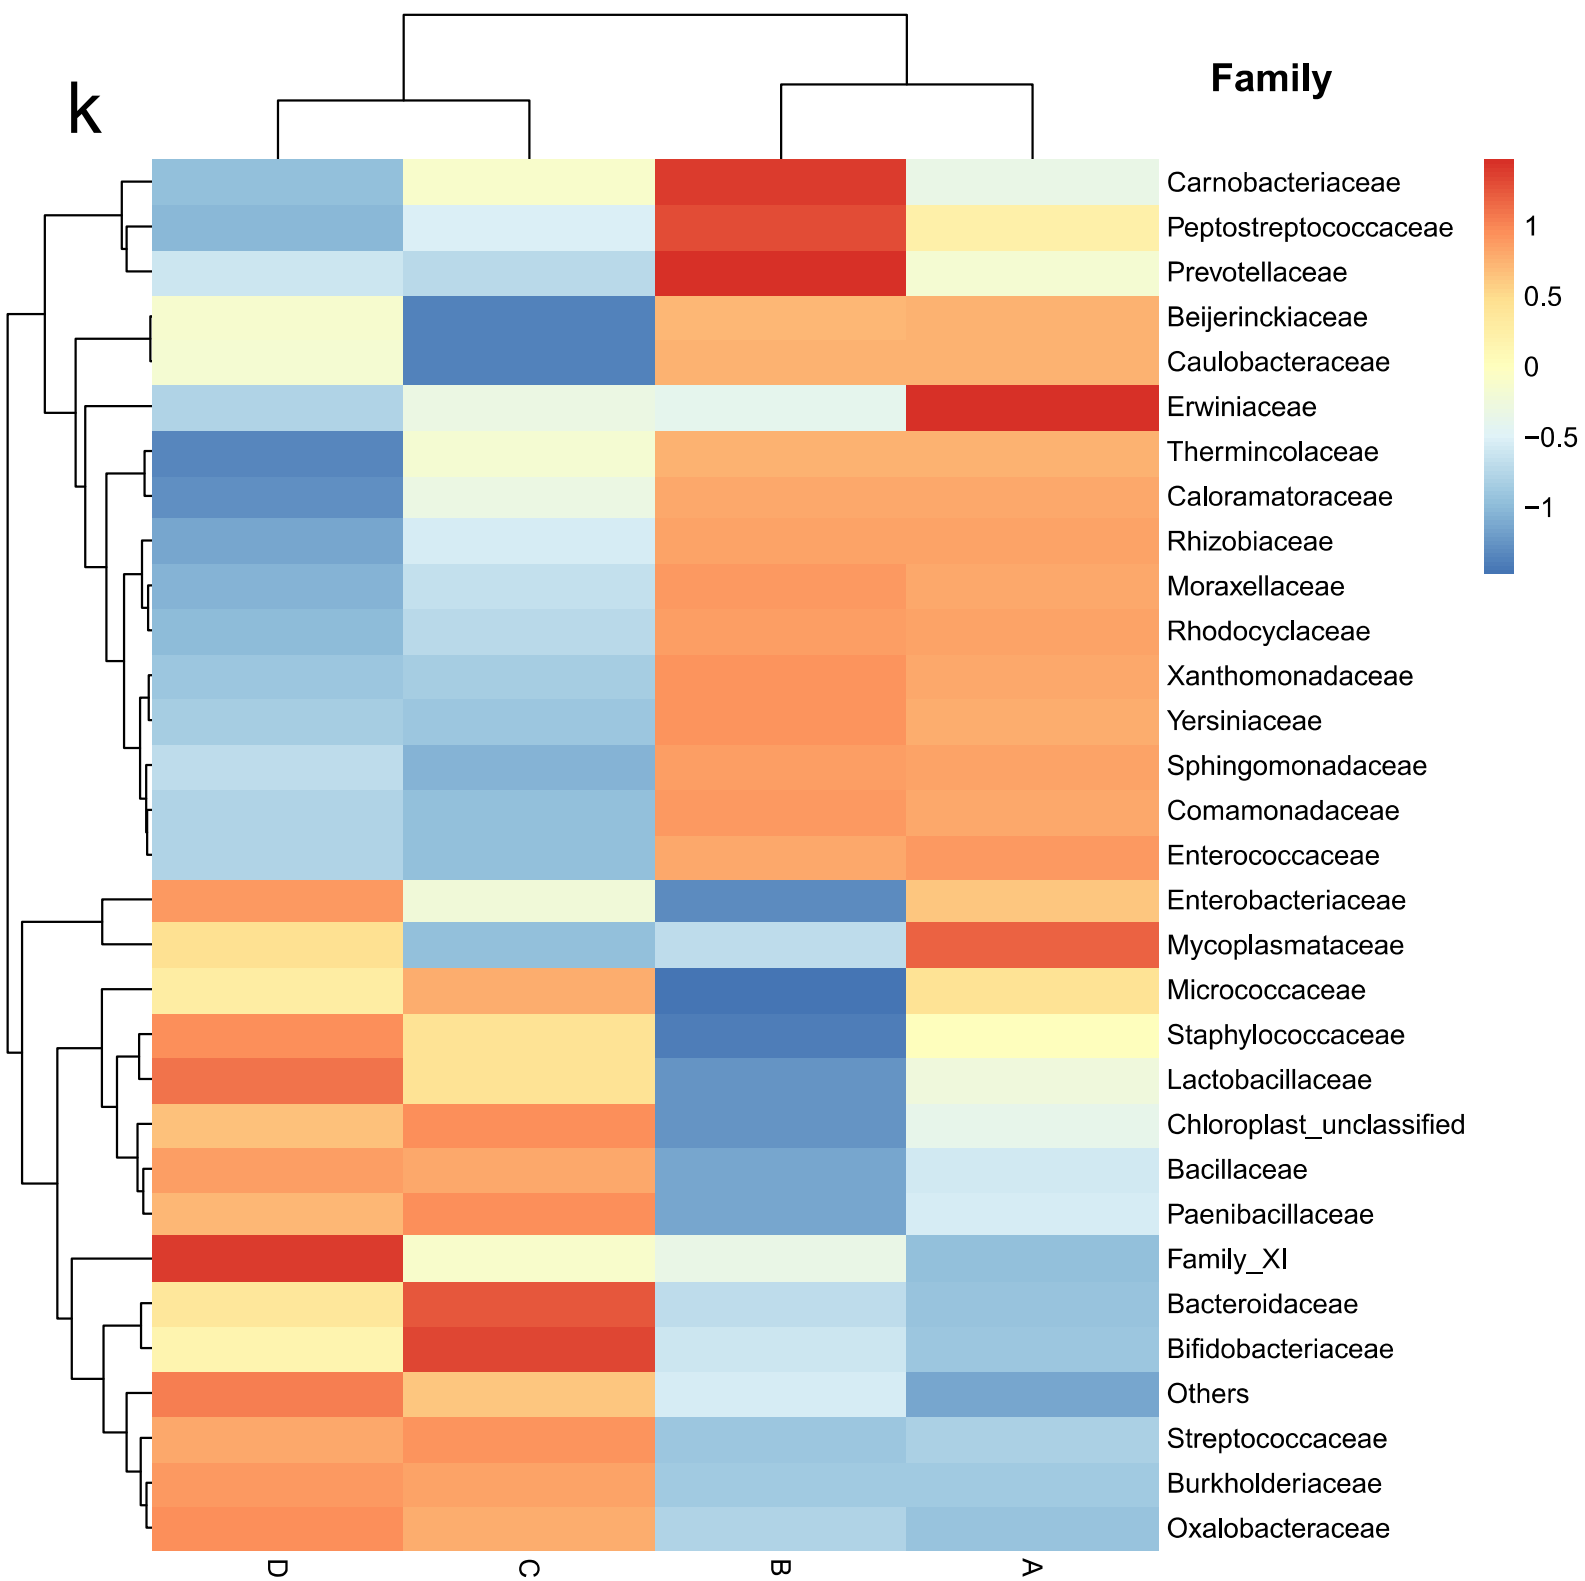

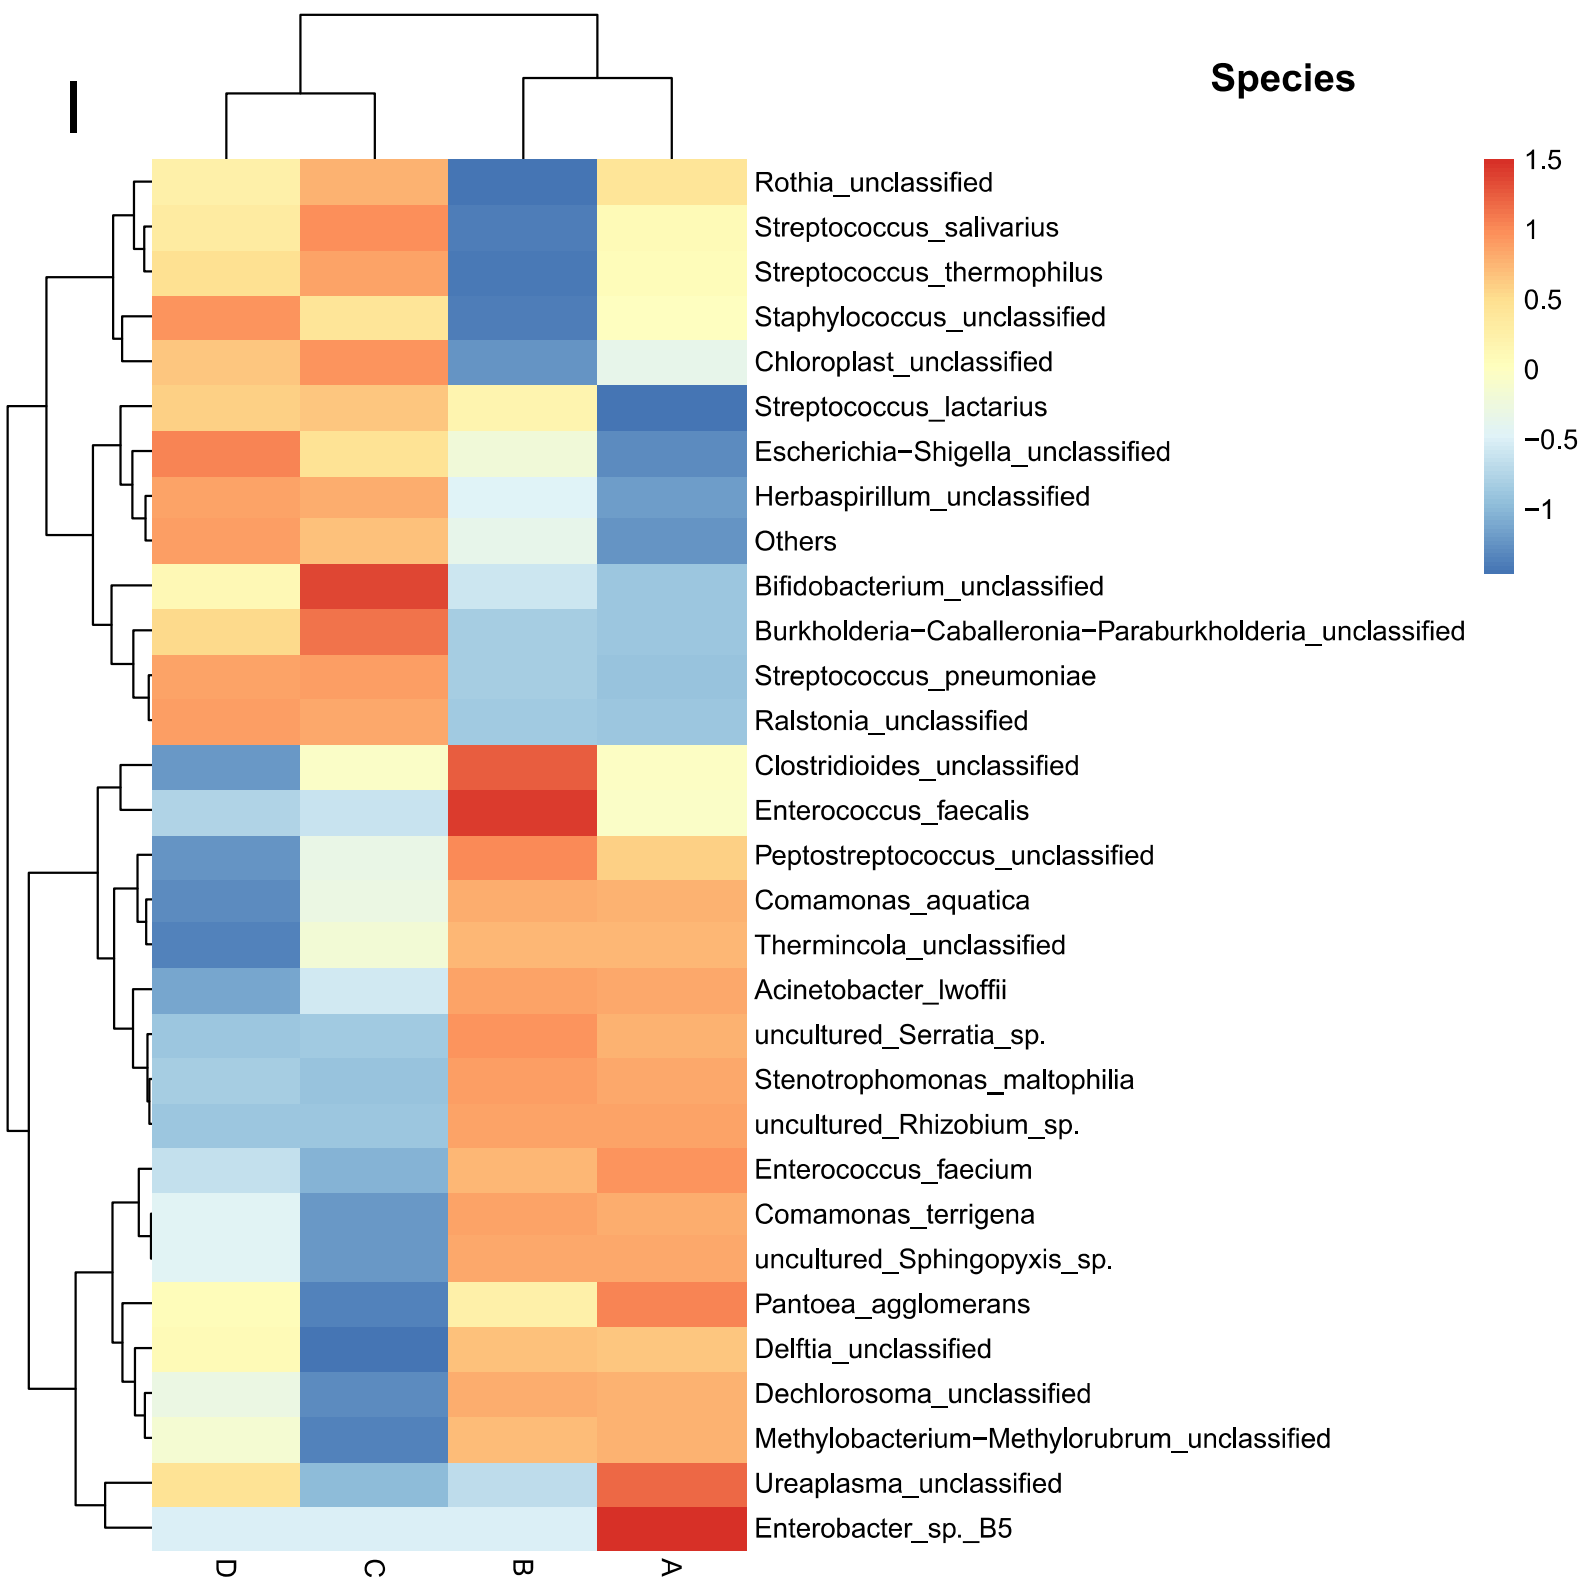

Supplement: f1 [file 2973605.f1.zip]
