# Supplementary material for: Bacterial Colonization in the Airways and Intestines of Twin and Singleton Preterm Neonates: A Single-Center Study
Source: Can J Infect Dis Med Microbiol. 2023 Aug 1;2023:2973605. doi: 10.1155/2023/2973605 (PMC10409585; doi:10.1155/2023/2973605)
Supplement: Supplementary Materials — Supplementary Material 1: sequence information identified in singleton and twin preterm neonates. Supplementary Material 2: abundance of bacterial taxa and corresponding 16SrRNA gene sequences in singleton and twin preterm neonates. Supplementary Material 3: class-, order-, family-, and species-level differences were determined using the Kruskal–Wallis test. Supplementary Material 4: three levels of annotation in the KEGG database on metabolic pathways. [file 2973605.f1.zip]

Archive with 6 entries (6 files):
- Supplementary Material 1 Sequence information.docx
- Supplementary Material 2 ASV_table_with_taxonomy.pdf
- Supplementary Material 3 Class, Order, Family and Species levels.pdf
- Supplementary Material 4 KEGG_level1.pdf
- Supplementary Material 4 KEGG_level2.pdf
- Supplementary Material 4 KEGG_level3.pdf
